# Supplementary material
Source: Copernicus journal article supplement (doi:10.5194/essd-2024-115)
Supplement: Supplementary file 2 [file essd-2024-115-supplement.zip]

1 **Global Methane Budget 2000-2020**

2 Marielle [Saunois](#)<sup>1</sup>, [Adrien Martinez](#)<sup>1</sup>, [Benjamin Poulter](#)<sup>2</sup>, [Zhen Zhang](#)<sup>3,4</sup>, [Peter A. Raymond](#)<sup>5</sup>, [Pierre](#)  
3 [Regnier](#)<sup>6</sup>, [Josep G. Canadell](#)<sup>7</sup>, [Robert B. Jackson](#)<sup>8</sup>, [Prabir K. Patra](#)<sup>9,10</sup>, [Philippe Bousquet](#)<sup>1</sup>, [Philippe](#)  
4 [Ciais](#)<sup>1</sup>, [Edward J. Dlugokencky](#)<sup>11</sup>, [Xin Lan](#)<sup>11,12</sup>, [George H. Allen](#)<sup>13</sup>, [David Bastviken](#)<sup>14</sup>, [David J.](#)  
5 [Beerling](#)<sup>15</sup>, [Dmitry A. Belikov](#)<sup>16</sup>, [Donald R. Blake](#)<sup>17</sup>, [Simona Castaldi](#)<sup>18</sup>, [Monica Crippa](#)<sup>19,20</sup>, [Bridget R.](#)  
6 [Deemer](#)<sup>21</sup>, [Fraser Dennison](#)<sup>22</sup>, [Giuseppe Etiope](#)<sup>23,24</sup>, [Nicola Gedney](#)<sup>25</sup>, [Lena Höglund-Jaksson](#)<sup>26</sup>,  
7 [Meredith A. Holgerson](#)<sup>27</sup>, [Peter O. Hopcroft](#)<sup>28</sup>, [Gustaf Hugelius](#)<sup>29</sup>, [Akihiko Ito](#)<sup>30</sup>, [Atul K. Jain](#)<sup>31</sup>, [Rajesh](#)  
8 [Janardanan](#)<sup>32</sup>, [Matthew S. Johnson](#)<sup>33</sup>, [Thomas Kleinen](#)<sup>34</sup>, [Paul B. Krummel](#)<sup>22</sup>, [Ronny Lauerwald](#)<sup>35</sup>,  
9 [Tingting Li](#)<sup>36</sup>, [Xiangyu Liu](#)<sup>37</sup>, [Kyle C. McDonald](#)<sup>38</sup>, [Joe R. Melton](#)<sup>39</sup>, [Jens Mühle](#)<sup>40</sup>, [Jurek Müller](#)<sup>41</sup>,  
10 [Fabiola Murguía-Flores](#)<sup>42</sup>, [Yosuke Niwa](#)<sup>32,43</sup>, [Sergio Noce](#)<sup>44</sup>, [Shufen Pan](#)<sup>45</sup>, [Robert J. Parker](#)<sup>46</sup>, [Changhui](#)  
11 [Peng](#)<sup>47,48</sup>, [Michel Ramonet](#)<sup>1</sup>, [William J. Riley](#)<sup>49</sup>, [Gerard Rocher-Ros](#)<sup>50</sup>, [Judith A. Rosentreter](#)<sup>51</sup>, [Motoki](#)  
12 [Sasakawa](#)<sup>32</sup>, [Arjo Segers](#)<sup>52</sup>, [Steven J. Smith](#)<sup>53,54</sup>, [Emily H. Stanley](#)<sup>55</sup>, [Joël Thanwerdas](#)<sup>56,\*</sup>, [Hanqin Tian](#)<sup>57</sup>,  
13 [Aki Tsuruta](#)<sup>58</sup>, [Francesco N. Tubiello](#)<sup>59</sup>, [Thomas S. Weber](#)<sup>60</sup>, [Guido R. van der Werf](#)<sup>61</sup>, [Douglas E. J.](#)  
14 [Worthy](#)<sup>62</sup>, [Yi Xi](#)<sup>1</sup>, [Yukio Yoshida](#)<sup>32</sup>, [Wenxin Zhang](#)<sup>63</sup>, [Bo Zheng](#)<sup>64,65</sup>, [Qing Zhu](#)<sup>49</sup>, [Qian Zhu](#)<sup>66</sup>, and  
15 [Qianlai Zhuang](#)<sup>37</sup>

- 16  
17 <sup>1</sup>Laboratoire des Sciences du Climat et de l'Environnement, LSCE-IPSL (CEA-CNRS-UVSQ), Université  
18 Paris-Saclay 91191 Gif-sur-Yvette, France  
19 <sup>2</sup>NASA Goddard Space Flight Center, Biospheric Science Laboratory, Greenbelt, MD 20771, USA  
20 <sup>3</sup>National Tibetan Plateau Data Center (TPDC), State Key Laboratory of Tibetan Plateau Earth System,  
21 Environment and Resource (TPESER), Institute of Tibetan Plateau Research, Chinese Academy of Sciences,  
22 Beijing, 100101, China  
23 <sup>4</sup>Earth System Science Interdisciplinary Center, University of Maryland, College Park, MD 20740, USA  
24 <sup>5</sup>Yale School of the Environment, Yale University, New Haven, CT 06511, USA  
25 <sup>6</sup>Department Geoscience, Environment & Society (BGEOSYS), Université Libre de Bruxelles, 1050 Bruxelles,  
26 Belgium  
27 <sup>7</sup>Global Carbon Project, CSIRO Environment, Canberra, ACT 2601, Australia  
28 <sup>8</sup>Department of Earth System Science, Woods Institute for the Environment, and Precourt Institute for Energy,  
29 Stanford University, Stanford, CA 94305-2210, USA  
30 <sup>9</sup>Research Institute for Global Change, JAMSTEC, 3173-25 Showa-machi, Kanazawa, Yokohama, 236-  
31 0001, Japan  
32 <sup>10</sup>Research Institute for Humanity and Nature, Kyoto 6038047, Japan  
33 <sup>11</sup>NOAA Global Monitoring Laboratory, 325 Broadway, Boulder, CO 80305, USA  
34 <sup>12</sup>Cooperative Institute for Research in Environmental Sciences, University of Colorado Boulder, CO 80303,  
35 USA  
36 <sup>13</sup>Department of Geosciences, Virginia Polytechnic Institute and State University, Blacksburg, VA, USA  
37 <sup>14</sup>Department of Thematic Studies – Environmental Change, Linköping University, 581 83 Linköping, Sweden  
38 <sup>15</sup>School of Biosciences, University of Sheffield, UK  
39 <sup>16</sup>Center for Environmental Remote Sensing, Chiba University, Chiba, 263-8522, Japan  
40 <sup>17</sup>Department of Chemistry, University of California Irvine, 570 Rowland Hall, Irvine, CA 92697, USA  
41 <sup>18</sup>Dipartimento di Scienze Ambientali, Biologiche e Farmaceutiche, Università degli Studi della Campania Luigi

Définition du style ... [1]

Supprimé: The ...lobal Methane Budget 2000-2017 ... [2]

Supprimé: Saunois<sup>1</sup>, Ann R. Stavert<sup>2</sup>, Ben Poulter<sup>3</sup>, Philippe Bousquet<sup>1</sup>, ...aunois<sup>1</sup>, Adrien Martinez<sup>1</sup>, Benjamin Poulter<sup>2</sup>, Zhen Zhang<sup>3,4</sup>, Peter A. Raymond<sup>5</sup>, Pierre Regnier<sup>6</sup>, Josep G. Canadell<sup>7</sup>, ...anadell<sup>7</sup>, Robert B. Jackson<sup>8</sup>, Peter A. Raymond<sup>5</sup>, Edward J. Dlugokencky<sup>9</sup>, Sander Houweling<sup>7,8</sup> ... [3]

Mis en forme : Police :12 pt

Supprimé: Ciais<sup>1</sup>, Vivek K. Arora<sup>11</sup>, ...ousquet<sup>1</sup>, Philippe Ciais<sup>1</sup>, Edward J. Dlugokencky<sup>11</sup>, Xin Lan<sup>11,12</sup>, George H. Allen<sup>13</sup>, David Bastviken<sup>12</sup>, Peter Bergamaschi<sup>13</sup>, ...astviken<sup>14</sup>, David J. Beerling<sup>15</sup>, Dmitry A. Belikov<sup>16</sup>, Donald R. Blake<sup>14</sup>, Gordon Brailsford<sup>15</sup>, Lori Bruhwiler<sup>6</sup>, Kimberly M. Carlson<sup>16,17</sup>, Mark Carol<sup>1</sup> ... [4]

Mis en forme

Supprimé: <sup>19</sup>

Mis en forme : Police :12 pt

Supprimé: Naveen Chandra<sup>8</sup>, Cyril Crevoisier<sup>21</sup>, Patrick M. Crill<sup>22</sup>, Kristofer Covey<sup>23</sup>, Charles L. Curry<sup>24</sup>, ...ridget R. Deemer<sup>21</sup>, Fraser Dennison<sup>22</sup>, Giuseppe Etiope<sup>25,26</sup>, Christian ... [6]

Mis en forme : Police :12 pt

Supprimé: Aki Tsuruta<sup>60</sup> Nicolas Viomy<sup>1</sup>, Apostolos ... [7]

Mis en forme : Police :10 pt

Supprimé: <sup>2</sup>Global Carbon Project, CSIRO Oceans and ... [8]

Mis en forme

Supprimé: <sup>4</sup>Department

Mis en forme : Retrait : Gauche : 0 cm

Supprimé: <sup>5</sup>School of Forestry and Environmental Studies, Yale ... [10]

Mis en forme

Mis en forme : Police :10 pt

Supprimé: <sup>10</sup> Center

Mis en forme

Supprimé: Remote Sensing, Chiba...ciences, University, Chiba ... [12]

Mis en forme : Police :8 pt

Supprimé: <sup>11</sup>Canadian Centre for Climate Modelling and ... [14]

Mis en forme

Supprimé: <sup>13</sup>European Commission Joint Research Centre, Via ... [16]

Mis en forme

Mis en forme

Supprimé: Irvine

Mis en forme

Supprimé: <sup>15</sup>National Institute of Water and Atmospheric ... [20]

Mis en forme : Police :10 pt

204 Vanvitelli, via Vivaldi 43, 81100 Caserta, Italy

205 <sup>19</sup>European Commission, Joint Research Centre (JRC), Ispra, Italy

206 <sup>20</sup>Unisystems S.A., Milan, Italy

207 <sup>21</sup>U.S. Geological Survey, Southwest Biological Science Center, Flagstaff, AZ, USA

208 <sup>22</sup>CSIRO Environment, Aspendale, Victoria 3195, Australia

209 <sup>23</sup>Istituto Nazionale di Geofisica e Vulcanologia, Sezione Roma 2, via V. Murata 605 00143 Rome, Italy

210 <sup>24</sup>Faculty of Environmental Science and Engineering, Babes Bolyai University, Cluj-Napoca, Romania

211 <sup>25</sup>Met Office Hadley Centre, Joint Centre for Hydrometeorological Research, Maclean Building, Wallingford

212 OX10 8BB, UK

213 <sup>26</sup>Pollution Management Group (PM), International Institute for Applied Systems Analysis (IIASA), 2361

214 Laxenburg, Austria

215 <sup>27</sup>Department of Ecology & Evolutionary Biology, Cornell University, Ithaca, NY, USA

216 <sup>28</sup>School of Geography, Earth & Environmental Sciences, University of Birmingham, UK

217 <sup>29</sup>Department of Physical Geography and Bolin Centre for Climate Research, Stockholm University, 106 91

218 Stockholm, Sweden

219 <sup>30</sup>Graduate School of Agricultural and Life Sciences, The University of Tokyo, Tokyo, Japan

220 <sup>31</sup>Department of Atmospheric Sciences, University of Illinois, Urbana, IL 61821, USA

221 <sup>32</sup>Earth System Division, National Institute for Environmental Studies (NIES), Onogawa 16-2, Tsukuba, Ibaraki

222 305-8506, Japan

223 <sup>33</sup>Earth Science Division, NASA Ames Research Center, Moffett Field, CA USA

224 <sup>34</sup>Max Planck Institute for Meteorology, Bundesstraße 53, 20146 Hamburg, Germany

225 <sup>35</sup>Université Paris-Saclay, INRAE, AgroParisTech, UMR EcoSys, Palaiseau, France

226 <sup>36</sup>LAPC, Institute of Atmospheric Physics, Chinese Academy of Sciences, Beijing, 100029, China

227 <sup>37</sup>Department of Earth, Atmospheric, and Planetary Sciences, Purdue University, West Lafayette, IN, USA

228 <sup>38</sup>Department of Earth and Atmospheric Sciences, City College of New York, City University of New York, NY,

229 USA

230 <sup>39</sup>Climate Research Division, Environment and Climate Change Canada, Victoria, BC, V8W 2Y2, Canada

231 <sup>40</sup>Scripps Institution of Oceanography, University of California San Diego, La Jolla, CA, 92037, USA

232 <sup>41</sup>Climate and Environmental Physics, Physics Institute and Oeschger Centre for Climate Change Research,

233 University of Bern, Sidlerstr. 5, 3012 Bern, Switzerland

234 <sup>42</sup>Instituto de Investigaciones en Ecología y Sustentabilidad, Universidad Nacional Autónoma de México,

235 Morelia, Mexico

236 <sup>43</sup>Department of Climate and Geochemistry Research, Meteorological Research Institute (MRI), Nagamine 1-1, Tsukuba,

237 Ibaraki 305-0052, Japan

238 <sup>44</sup>CMCC Foundation - Euro-Mediterranean Center on Climate Change, Italy

239 <sup>45</sup>Department of Engineering and Environmental Studies Program, Boston College, Chestnut Hill, MA 02467,

240 USA

241 <sup>46</sup>National Centre for Earth Observation, School of Physics and Astronomy, University of Leicester, Leicester,

242 LE1 7RH, UK

243 <sup>47</sup>Department of Biology Sciences, Institute of Environment Science, University of Quebec at Montreal,

244 Montreal, QC H3C 3P8, Canada

245 <sup>48</sup>School of Geographic Sciences, Hunan Normal University, Changsha 410081, China

246 <sup>49</sup>Climate and Ecosystem Sciences Division, Lawrence Berkeley National Lab, 1 Cyclotron Road, Berkeley, CA

247 94720, US

248 <sup>50</sup>Department of Forest Ecology and Management, Swedish University of Agricultural Sciences, 90183 Umeå,

249 Sweden

250 <sup>51</sup>Centre for Coastal Biogeochemistry, Faculty of Science and Engineering, Southern Cross University, Lismore,

251 NSW 2480, Australia

252 <sup>52</sup>TNO, dep. of Climate Air & Sustainability, P.O. Box 80015, NL-3508-TA, Utrecht, The Netherlands

Mis en forme ... [21]

Supprimé: <sup>19</sup>Department of Landscape Design and Sustainable ... [22]

Mis en forme ... [24]

Supprimé: Sciences and Bolin Centre for Climate Research, ... [25]

Mis en forme ... [26]

Mis en forme ... [23]

Supprimé: <sup>24</sup>School of Earth and Ocean Sciences, University of ... [27]

Mis en forme ... [28]

Supprimé: <sup>26</sup> Faculty

Supprimé: <sup>27</sup> Division of Geological and Planetary Sciences, ... [29]

Supprimé: <sup>30</sup>Department of Meteorology, University of ... [30]

Mis en forme ... [31]

Supprimé: <sup>32</sup>Department

Mis en forme ... [32]

Mis en forme ... [33]

Supprimé: <sup>33</sup>Center for Global Environmental Research

Mis en forme ... [34]

Mis en forme ... [35]

Supprimé: <sup>34</sup>Department

Mis en forme ... [36]

Mis en forme ... [37]

Supprimé: New York,

Mis en forme ... [38]

Supprimé: 10031

Mis en forme ... [39]

Supprimé: <sup>35</sup>Climate

Mis en forme ... [40]

Supprimé: <sup>36</sup>Max Planck Institute for Meteorology, ... [41]

Supprimé: Earth, Atmospheric, Planetary Sciences, Department ... [42]

Supprimé: <sup>46</sup>School of Chemistry, University of Bristol, ... [43]

Mis en forme ... [44]

Supprimé: <sup>48</sup>Department

Supprimé: <sup>49</sup>Sino-French Institute for Earth System Science, ... [45]

Supprimé: <sup>50</sup>CICERO Center for International Climate Research ... [46]

Supprimé: <sup>54</sup>Centre

Mis en forme ... [47]

Supprimé: School...aculty of Environment, ... [48]

Mis en forme ... [49]

Supprimé: <sup>55</sup>TNO

406 <sup>53</sup>Joint Global Change Research Institute, Pacific Northwest National Lab, College Park, MD, USA  
 407 <sup>54</sup>Center for Global Sustainability, University of Maryland, College Park, MD, USA  
 408 <sup>55</sup>Center for Limnology, University of Wisconsin-Madison, Madison, WI, USA  
 409 <sup>56</sup>Empa, Swiss Federal Laboratories for Materials Science and Technology, Dübendorf, Switzerland  
 410 <sup>57</sup>Center for Earth System Science and Global Sustainability, Schiller Institute for Integrated Science and  
 411 Society, Department of Earth and Environmental Sciences, Boston College, Chestnut Hill, MA 02467, USA  
 412 <sup>58</sup>Finnish Meteorological Institute, P.O. Box 503, FI-00101, Helsinki, Finland  
 413 <sup>59</sup>Statistics Division, Food and Agriculture Organization of the United Nations (FAO), Viale delle  
 414 Terme di Caracalla, Rome 00153, Italy  
 415 <sup>60</sup>Department of Earth and Environmental Sciences, University of Rochester, Rochester, NY 14627,  
 416 USA  
 417 <sup>61</sup>Meteorology and Air Quality Group, Wageningen University and Research, Wageningen, the Netherlands  
 418 <sup>62</sup>Environment and Climate Change Canada, 4905, Dufferin Street, Toronto, Canada  
 419 <sup>63</sup>Department of Physical Geography and Ecosystem Science, Lund University, Solvegatan 12, 223 62, Lund, Sweden  
 420 <sup>64</sup>Institute of Environment and Ecology, Tsinghua Shenzhen International Graduate School, Tsinghua University,  
 421 Shenzhen 518055, China  
 422 <sup>65</sup>State Environmental Protection Key Laboratory of Sources and Control of Air Pollution Complex, Beijing 100084,  
 423 China  
 424 <sup>66</sup>College of Geography and Remote Sensing, Hohai University, Nanjing, 210098, China  
 425  
 426 \*formerly at LSCE <sup>1</sup>  
 427  
 428 Correspondence to: Marielle Sauniois (marielle.sauniois@lsce.ipsl.fr)

429 **Abstract.** Understanding and quantifying the global methane (CH<sub>4</sub>) budget is important for assessing realistic pathways to  
 430 mitigate climate change. Emissions and atmospheric concentrations of CH<sub>4</sub> continue to increase, maintaining CH<sub>4</sub> as the  
 431 second most important human-influenced greenhouse gas in terms of climate forcing after carbon dioxide (CO<sub>2</sub>). The relative  
 432 importance of CH<sub>4</sub> compared to CO<sub>2</sub> for temperature change is related to its shorter atmospheric lifetime, stronger radiative  
 433 effect, and acceleration in atmospheric growth rate over the past decade, the causes of which are still debated. Two major  
 434 challenges in reducing uncertainties in the factors explaining the well-observed atmospheric growth rate arise from diverse,  
 435 geographically overlapping CH<sub>4</sub> sources and from the uncertain magnitude and temporal change in the destruction of CH<sub>4</sub>  
 436 by short-lived and highly variable hydroxyl radicals (OH). To address these challenges, we have established a consortium  
 437 of multi-disciplinary scientists under the umbrella of the Global Carbon Project to improve, synthesise and update the global  
 438 CH<sub>4</sub> budget regularly and to stimulate new research on the methane cycle. Following Sauniois et al. (2016, 2020), we present  
 439 here the third version of the living review paper dedicated to the decadal CH<sub>4</sub> budget, integrating results of top-down CH<sub>4</sub>  
 440 emission estimates (based on in-situ and greenhouse gas observing satellite (GOSAT) atmospheric observations and an  
 441 ensemble of atmospheric inverse-model results) and bottom-up estimates (based on process-based models for estimating  
 442 land-surface emissions and atmospheric chemistry, inventories of anthropogenic emissions, and data-driven extrapolations).  
 443 We present a budget for the most recent 2010-2019 calendar decade (the latest period for which full datasets are available),  
 444 for the previous decade of 2000-2009 and for the year 2020.

Supprimé: <sup>56</sup>International Center for Climate and Global ... [50]  
 Supprimé: <sup>58</sup>Department of Atmospheric and Oceanic Science  
 Déplacé (insertion) [1]  
 Mis en forme ... [52]  
 Mis en forme ... [51]  
 Mis en forme ... [53]  
 Déplacé vers le haut [1]: Meteorological Institute, P.O.  
 Supprimé: <sup>60</sup>Finnish  
 Mis en forme ... [54]  
 Supprimé: <sup>61</sup>Department of Physics, Imperial College ... [55]  
 Supprimé: <sup>64</sup>KNMI, P.O. Box 201, 3730 AE, De Bilt  
 Mis en forme ... [56]  
 Supprimé: <sup>65</sup>Scripps Institution of Oceanography (SIO), ... [57]  
 Mis en forme ... [58]  
 Supprimé: rue  
 Mis en forme ... [59]  
 Supprimé: , Toronto, Canada<sup>6</sup> ... [60]  
 Supprimé: <sup>68</sup>Department <sup>3</sup>Department of Geographical Science<sup>61</sup>  
 Mis en forme ... [62]  
 Supprimé: Maryland, United States  
 Mis en forme ... [63]  
 Mis en forme ... [64]  
 Supprimé: America  
 Mis en forme ... [65]  
 Supprimé: <sup>69</sup>College <sup>6</sup>College of Hydrology...eography and... [66]  
 Mis en forme ... [67]  
 Mis en forme ... [68]  
 Mis en forme ... [69]  
 Supprimé: Atmospheric emissions...missions and atmospheric [70]  
 Supprimé: ,  
 Supprimé: depends on...or temperature change is related to its [71]  
 Supprimé: variations...cceleration in atmospheric growth rate [72]  
 Supprimé: the variety of  
 Supprimé: difficulties  
 Supprimé: synthesise  
 Supprimé: aimed at improving and regularly updating the global [73]  
 Supprimé: second...hird version of the living review paper ... [74]  
 Supprimé: within  
 Supprimé: modelling framework...odel results) and bottom-up [75]  
 Supprimé:

The revision of the bottom-up budget in this edition benefits from important progress in estimating inland freshwater emissions, with better accounting of emissions from lakes and ponds, reservoirs, and streams and rivers. This budget also reduces double accounting across freshwater and wetland emissions and, for the first time, includes an estimate of the potential double accounting that still exists (average of 23 Tg CH<sub>4</sub> yr<sup>-1</sup>). Bottom-up approaches show that the combined wetland and inland freshwater emissions average 248 [159-369] Tg CH<sub>4</sub> yr<sup>-1</sup> for the 2010-2019 decade. Natural fluxes are perturbed by human activities through climate, eutrophication, and land use. In this budget, we also estimate, for the first time, this anthropogenic component contributing to wetland and inland freshwater emissions. Newly available gridded products also allowed us to derive an almost complete latitudinal and regional budget based on bottom-up approaches. For the 2010-2019 decade, global CH<sub>4</sub> emissions are estimated by atmospheric inversions (top-down) to be 575 Tg CH<sub>4</sub> yr<sup>-1</sup> (range 553-586, corresponding to the minimum and maximum estimates of the model ensemble). Of this amount, 369 Tg CH<sub>4</sub> yr<sup>-1</sup> or ~65% are attributed to direct anthropogenic sources in the fossil, agriculture and waste and anthropogenic biomass burning (range 350-391 Tg CH<sub>4</sub> yr<sup>-1</sup> or 63-68%). For the 2000-2009 period, the atmospheric inversions give a slightly lower total emission than for 2010-2019, by 32 Tg CH<sub>4</sub> yr<sup>-1</sup> (range 9-40). Since 2012, global direct anthropogenic CH<sub>4</sub> emission trends have been tracking scenarios that assume no or minimal climate mitigation policies proposed by the Intergovernmental Panel on Climate Change (shared socio-economic pathways SSP5 and SSP3). Bottom-up methods suggest 46% (94 Tg CH<sub>4</sub> yr<sup>-1</sup>) larger global emissions (669 Tg CH<sub>4</sub> yr<sup>-1</sup>, range 512-849) than top-down inversion methods for the 2010-2019 period. The discrepancy between the bottom-up and the top-down budgets has been greatly reduced compared to the previous differences (167 and 156 Tg CH<sub>4</sub> yr<sup>-1</sup> in Saunio et al. (2016, 2020), respectively), and for the first time uncertainty in bottom-up and top-down budgets overlap. The latitudinal distribution from atmospheric inversion-based emissions indicates a predominance of tropical and southern hemisphere emissions (~65% of the global budget, <30°N) compared to mid (30°N-60°N, ~30% of emissions) and high-northern latitudes (60°N-90°N, ~4% of global emissions). This latitudinal distribution is similar in the bottom-up budget though the bottom-up budget estimates slightly larger contributions for the mid and high-northern latitudes, and slightly smaller contributions from the tropics and southern hemisphere than the inversions. Although differences have been reduced between inversions and bottom-up, the most important source of uncertainty in the global CH<sub>4</sub> budget is still attributable to natural emissions, especially those from wetlands and inland freshwaters. We identify five major priorities for improving the CH<sub>4</sub> budget: i) producing a global, high-resolution map of water-saturated soils and inundated areas emitting CH<sub>4</sub> based on a robust classification of different types of emitting ecosystems; ii) further development of process-based models for inland-water emissions; iii) intensification of CH<sub>4</sub> observations at local (e.g., FLUXNET-CH<sub>4</sub> measurements, urban-scale monitoring, satellite imagery with pointing capabilities) to regional scales (surface networks and global remote sensing measurements from satellites) to constrain both bottom-up models and atmospheric inversions; iv) improvements of transport models and the representation of photochemical sinks in top-down inversions, and v) integration of 3D variational inversion systems using isotopic and/or co-emitted species such as ethane

**Supprimé:** 2008-2017...2010-2019 decade, global methane...H<sub>4</sub> emissions are estimated by atmospheric inversions (a ...op-down approach... to be 576...75 Tg CH<sub>4</sub> yr<sup>-1</sup> (range 550-594...53-586, corresponding to the minimum and maximum estimates of the model ensemble), of which 359.... Of this amount, 369 Tg CH<sub>4</sub> yr<sup>-1</sup> or ~60...5% are attributed to direct anthropogenic sources, that is emissions caused by direct human activity ... [76]

**Mis en forme :** Anglais (G.B.)

**Supprimé:** 336-376

**Mis en forme :** Anglais (G.B.)

**Supprimé:** 50-65%). The updated...3-68%). For the 2000-2009 period, the atmospheric inversions give a slightly lower total emission is 29 Tg CH<sub>4</sub> yr<sup>-1</sup> larger ...han our estimate for the period 2000-2009 and 24 Tg CH<sub>4</sub> yr<sup>-1</sup> larger than the one reported in the previous budget for 2003-2012 (Saunio et al., 2016). ... [77]

**Supprimé:** CH<sub>4</sub> emissions...irect anthropogenic CH<sub>4</sub> emission trends have been tracking the warmest ...enarios assessed...hat assume no or minimal climate mitigation policies proposed by the Intergovernmental Panel on Climate Change...(shared socio-economic pathways SSP5 and SSP3). Bottom-up methods suggest almost 30%...6% (94 Tg CH<sub>4</sub> yr<sup>-1</sup>) larger global emissions (737...69 Tg CH<sub>4</sub> yr<sup>-1</sup>, range 594-881...12-849) than top-down inversion methods. Indeed...for the 2010-2019 period. The discrepancy between the bottom-up estimates for natural sources such as natural wetlands, other inland water systems, and geological sources are higher than...nd the top-down estimates. The atmospheric constraints on the ... [78]

**Supprimé:** budget suggest that at least some of these bottom-up emissions are overestimated...The latitudinal distribution of ...rom atmospheric observation...nversion-based emissions indicates a predominance of tropical and southern hemisphere emissions (~65% of the global budget, <30°N) compared to mid (~30%, ...30°N-60°N, ~30% of emissions) and high-northern latitudes (~4%, 60°N-90°N). The ... [79]

**Supprimé:** methane

**Mis en forme :** Indice

**Supprimé:** other inland waters. Some of our global source estimates are smaller than those in previously published budgets (Saunio et al. 2016; Kirschke et al. 2013), particularly for wetland emissions that are about 35 Tg CH<sub>4</sub> yr<sup>-1</sup> lower due to efforts to better partition wetlands and other inland waters. Emissions from geological sources are also found to be... [80]

**Supprimé:** methane

**Mis en forme :** Indice

**Supprimé:** include

**Supprimé:** methane

**Supprimé:** habitats...cosystems; ii) further development of process-based models for inland-water emissions; iii) intensification... [81]

**Mis en forme :** Indice

**Mis en forme :** Indice

**Supprimé:** scales ...e.g., FLUXNET-CH<sub>4</sub> measurements and...urban-scale monitoring, satellite imagery with pointing capabilities... [82]

as well as information in the bottom-up inventories on anthropogenic super-emitters detected by remote sensing (mainly oil and gas sector but also coal, agriculture and landfills) to improve source partitioning. The data presented here can be downloaded from <https://doi.org/10.18160/GCP-CH4-2024/> (Martinez et al., 2024).

## 1 Introduction

The average surface dry air mole fraction of atmospheric methane ( $\text{CH}_4$ ) reached 1912 ppb in 2022 (Fig. 1, Lan et al., 2024), 2.6 times greater than its estimated pre-industrial value in 1750. This increase is attributable in large part to increased anthropogenic emissions arising primarily from agriculture (e.g., livestock production, rice cultivation, biomass burning), fossil fuel production and use, waste disposal, and alterations to natural  $\text{CH}_4$  fluxes due to increased atmospheric  $\text{CO}_2$  concentrations, land use (Woodward et al., 2010; Fluet-Chouinard et al., 2023) and climate change (Ciais et al., 2013; Canadell et al., 2021). Atmospheric  $\text{CH}_4$  is a stronger absorber of Earth's emitted thermal infrared radiation than carbon dioxide ( $\text{CO}_2$ ), as assessed by its global warming potential (GWP) relative to  $\text{CO}_2$ . For a 100-yr time horizon and without considering climate feedbacks the GWP of  $\text{CH}_4$ -fossil is 29.8 ( $\text{CH}_4$ -non fossil GWP is 27), whereas the values reach 82.5 over a 20-year horizon for  $\text{CH}_4$ -fossil and 79.7 for  $\text{CH}_4$ -non fossil (Forster et al., 2021). Although global anthropogenic emissions of  $\text{CH}_4$  are estimated at around 359 Tg  $\text{CH}_4 \text{ yr}^{-1}$  (Sauniois et al., 2020), representing around 2.5% of the global  $\text{CO}_2$  anthropogenic emissions when converted to units of carbon mass flux for the recent decade, the emissions-based effective radiative forcing of  $\text{CH}_4$  concentrations has contributed ~31% ( $1.19 \text{ W m}^{-2}$ ) to the additional radiative forcing from anthropogenic emissions of greenhouse gases and their precursors ( $3.84 \text{ W m}^{-2}$ ) over the industrial era (1750-2019) (Forster et al., 2021). Changes in other chemical compounds such as nitrogen oxides ( $\text{NO}_x$ ) or carbon monoxide ( $\text{CO}$ ) also influence atmospheric  $\text{CH}_4$  through changes to its atmospheric lifetime. Emissions of  $\text{CH}_4$  contribute to the production of ozone, stratospheric water vapour, and  $\text{CO}_2$ , and most importantly affect its own lifetime (Myhre et al., 2013; Shindell et al., 2012).  $\text{CH}_4$  has a short lifetime in the atmosphere (about 9 years for the year 2010, Prather et al., 2012). Hence a stabilisation or reduction of  $\text{CH}_4$  emissions leads to the stabilisation or reduction of its atmospheric concentration (assuming no change in the chemical oxidants), and therefore its radiative forcing, in only a few decades. While reducing  $\text{CO}_2$  emissions is necessary to stabilise long-term warming, reducing  $\text{CH}_4$  emissions is recognized as an effective option to limit climate warming in the near-term (Shindell et al., 2012; Jackson et al., 2020; Ocko et al., 2021; UNEP, 2021), because of its shorter lifetime compared to  $\text{CO}_2$ .

The momentum around the potential of  $\text{CH}_4$  to limit near-term warming has led to the launch of the Global Methane Pledge at the November 2021 Conference of the Parties (COP 26). Signed by 150 countries, this collective effort aims at reducing global  $\text{CH}_4$  anthropogenic emissions at least 30 percent from 2020 levels by 2030 (Global Methane Pledge, 2023). Given that global baseline  $\text{CH}_4$  emissions are expected to grow through 2030 (by an additional 20-50 Million tons (Mt) of  $\text{CH}_4$ , UNEP 2022), the  $\text{CH}_4$  emission reductions currently needed to reach the Global Methane Pledge objective (UNEP,

**Supprimé:** <https://doi.org/10.18160/GCP-CH4-2019> (Sauniois

**Supprimé:** 2019) and from the Global Carbon Project.

**Supprimé:** ¶

**Mis en forme :** Normal, Espace Avant : 24 pt, Après : 12 pt, Paragraphes solidaires, Bordure : Haut: (Pas de bordure), Bas: (Pas de bordure), Gauche: (Pas de bordure), Droite: (Pas de bordure), Entre : (Pas de bordure)

**Mis en forme :** Police :Gras, Couleur de police : Noir

**Supprimé:** The surface dry air mole fraction of atmospheric methane ( $\text{CH}_4$ ) reached 1857 ppb in 2018 (Fig. 1), approximately 2.6 times greater than its estimated pre-industrial equilibrium value in 1750. This increase is attributable in large part to increased anthropogenic emissions arising primarily from agriculture (e.g., livestock production, rice cultivation, biomass burning), fossil fuel production and use, waste disposal, and alterations to natural methane fluxes due to increased atmospheric  $\text{CO}_2$  concentrations and climate change (Ciais et al., 2013). Atmospheric  $\text{CH}_4$  is a stronger absorber of Earth's emitted thermal infrared radiation than carbon dioxide ( $\text{CO}_2$ ), as assessed by its global warming potential (GWP) relative to  $\text{CO}_2$ . For a 100-yr time horizon and without considering climate feedbacks  $\text{GWP}(\text{CH}_4) = 28$  (IPCC AR5, Myhre et al., 2013). Although global anthropogenic emissions of  $\text{CH}_4$  are estimated at around 366 Tg  $\text{CH}_4 \text{ yr}^{-1}$  (Sauniois et al., 2016), representing only 3% of the global  $\text{CO}_2$  anthropogenic emissions in units of carbon mass flux, the increase of atmospheric  $\text{CH}_4$  concentrations has contributed ~23% ( $-0.62 \text{ W m}^{-2}$ ) to the additional radiative forcing accumulated in the lower atmosphere since 1750 (Etminan et al., 2016). Changes in other chemical compounds (such as nitrogen oxides ( $\text{NO}_x$ ) or carbon monoxide ( $\text{CO}$ )) also influence the forcing of atmospheric  $\text{CH}_4$  through changes to its atmospheric lifetime. From an emission perspective, the total radiative forcing attributable to anthropogenic  $\text{CH}_4$  emissions is currently about  $0.97 \text{ W m}^{-2}$  (Myhre et al., 2013). Emissions of  $\text{CH}_4$  contribute to the production of ozone, stratospheric water vapour, and  $\text{CO}_2$ , and most importantly affect its own lifetime (Myhre et al., 2013; Shindell et al., 2012).  $\text{CH}_4$  has a short lifetime in the atmosphere (about 9 years for the year 2010 (Prather et al., 2012)) hence a stabilization or reduction of  $\text{CH}_4$  emissions leads rapidly, in a few decades, to a stabilization or reduction of its atmospheric concentration and therefore its radiative forcing. Reducing  $\text{CH}_4$  emissions is therefore recognized as an effective option for rapid climate change mitigation, especially on decadal timescales (Shindell et al., 2012), because of its shorter lifetime than  $\text{CO}_2$ . ¶ Of concern, the current anthropogenic methane emissions trajectory is estimated to lie between the two warmest IPCC-AR5 scenarios (Nisbet et al., 2016, 2019), i.e., the RCP8.5 and RCP6.0, corresponding to temperature increases above  $3^\circ\text{C}$  by the end of this century. This trajectory implies that large reductions of methane emissions are needed to meet the  $1.5\text{-}2^\circ\text{C}$  target of the Paris Agreement (Collins et al., 2013; Nisbet et al., 2019). Moreover,  $\text{CH}_4$  is a precursor of important air pollutants such as ozone, and, as such, its emissions are covered by two international conventions: the United Nations Framework Convention on Climate Change (UNFCCC) and the Convention on Long Range Transport of Air Pollution (CLRTAP), another motivation to reduce its emissions. ¶ Changes in the magnitude and temporal variation (annual to inter-annual) of methane sources and sinks over the past decades are characterized by large uncertainties (Kirschke et al., 2013; Sauniois et al., 2017; Turner et al., 2019). Also, the decadal budget suggests relative uncertainties (hereafter reported as min-max ranges) of 20-31%



2022) correspond to 36% of the projected baseline emissions in 2030 (ie. if no further emission reductions were implemented). This implies that large reductions of CH<sub>4</sub> emissions are needed to meet the Global Methane Pledge that is consistent also with the 1.5-2°C target of the Paris Agreement (UNEP, 2022). Moreover, because CH<sub>4</sub> is a precursor of important air pollutants such as ozone, CH<sub>4</sub> emissions reductions are required by two international conventions: the United Nations Framework Convention on Climate Change (UNFCCC) and the Convention on Long Range Transport of Air Pollution (CLRTAP), making this global CH<sub>4</sub> budget assessment all the more critical.

Changes in the magnitude and temporal variation (annual to inter-annual) of CH<sub>4</sub> sources and sinks over the past decades are characterised by large uncertainties (e.g., Kirschke et al., 2013; Sauniois et al., 2017; Turner et al., 2019). Also, the decadal budget suggests relative uncertainties (hereafter reported as min-max ranges) of 20-35% for inventories of anthropogenic emissions in specific sectors (e.g., agriculture, waste, fossil fuels (Tibrewal et al., 2024)), 50% for biomass burning and natural wetland emissions, and up to 100% for other natural sources (e.g., inland waters, geological sources). The uncertainty in the chemical loss of CH<sub>4</sub> by OH, the predominant sink of atmospheric CH<sub>4</sub>, has been estimated using Prather et al. (2012) and Rigby et al. (2017) estimated this uncertainty at ~10% from the uncertainty in the reaction rate between CH<sub>4</sub> and OH, or using methyl-chloroform measurements. Bottom-up approaches (chemistry transport models) estimate the uncertainty of the chemical loss by OH at around 15-20% (Sauniois et al., 2016, 2020). This uncertainty on the OH induced loss translates, in the top-down methods, into the minimum relative uncertainty associated with global CH<sub>4</sub> emissions, as other CH<sub>4</sub> sinks (atomic oxygen and chlorine oxidations, soil uptake) are much smaller and the atmospheric growth rate is well-defined (Dlugokencky et al., 2009). Globally, the contribution of natural CH<sub>4</sub> emissions to total emissions can be quantified by combining lifetime estimates with reconstructed pre-industrial atmospheric CH<sub>4</sub> concentrations from ice cores (assuming natural emissions have not been perturbed during the anthropocene) (e.g., Ehhalt et al., 2001). Regionally or nationally, uncertainties in emissions may reach 40-60% (e.g., for South America, Africa, China, and India, see Sauniois et al., 2016).

To monitor emission reductions, for example to help conduct the Paris Agreement's stocktake, sustained and long-term monitoring of anthropogenic emissions per sector is needed in particular for hotspots of emissions that may be missed in inventories (Bergamaschi et al., 2018a; Pacala, 2010; Lauvaux et al., 2022). At the same time, reducing uncertainties in all individual CH<sub>4</sub> sources, and thus in the overall CH<sub>4</sub> budget remains challenging for at least four reasons. First, CH<sub>4</sub> is emitted by multiple processes, including natural and anthropogenic sources, point and diffuse sources, and sources associated with at least three different production origins (i.e., microbial, thermogenic, and pyrogenic). These multiple sources and processes require the integration of data from diverse scientific communities and across multiple temporal and spatial scales. The production of accurate bottom-up estimates is complicated by the fact that anthropogenic emissions result from leakage from fossil fuel production with large differences between countries depending on technologies and practices, the fact that many large leak events are sporadic, and the location of many emissions hotspots is not well known, and from uncertain emission factors used to summarise complex microbial processes in the agriculture and waste sectors. For the

899 latter, examples include difficulties in upscaling methane emissions from livestock without considering the variety of animal  
900 weight, diet and environment, and difficulties in assessing emissions from landfills depending on waste type and waste  
901 management technology. Second, atmospheric CH<sub>4</sub> is removed mainly by chemical reactions in the atmosphere involving  
902 OH and other radicals that have very short lifetimes (typically ~1s). Due to the short lifetime of OH, the spatial and temporal  
903 distributions of OH are highly variable. While OH can be measured locally, calculating global CH<sub>4</sub> loss through OH  
904 measurements requires high-resolution global OH measurements (typically half an hour to integrate cloud cover, and 1 km  
905 spatially to consider OH high reactivity and heterogeneity) which is impossible from direct OH observations. As a result,  
906 OH can only be calculated through large scale atmospheric chemistry modelling. Those simulated OH concentrations from  
907 transport-chemistry models prescribed with emissions of precursor species affecting OH still show uncertain spatio-temporal  
908 distribution from regional to global scales (Zhao et al., 2019). Third, only the net CH<sub>4</sub> budget (sources minus sinks) is well  
909 constrained by precise observations of atmospheric growth rates (Dlugokencky et al., 2009), leaving the sum of sources and  
910 the sum of sinks uncertain. One distinctive feature of CH<sub>4</sub> sources compared to CO<sub>2</sub> fluxes is that the oceanic contribution  
911 to the global CH<sub>4</sub> budget is small (~1-3%), making CH<sub>4</sub> source estimation predominantly a terrestrial endeavour (USEPA,  
912 2010b). Finally, we lack comprehensive observations to constrain 1) the areal extent of different types of wetlands and  
913 inland freshwater (Kleinen et al., 2012, 2020, 2021, 2023; Stocker et al., 2014; Zhang et al., 2021), 2) models of wetland  
914 and inland freshwater emission rates (Melton et al., 2013; Poulter et al., 2017; Wania et al., 2013; Bastviken et al., 2011;  
915 Wik et al., 2016a; Rosentreter et al., 2021; Bansal et al., 2023; Lauerwald et al., 2023a; Stanley et al., 2023), 3) inventories  
916 of anthropogenic emissions (Höglund-Isaksson et al., 2020; Crippa et al., 2023; USEPA, 2019), and 4) atmospheric  
917 inversions, which aim to estimate CH<sub>4</sub> emissions from global to regional scales (Houweling et al., 2017; Jacob et al., 2022).

918 The global CH<sub>4</sub> budget inferred from atmospheric observations by atmospheric inversions relies on regional  
919 constraints from atmospheric sampling networks, which are relatively dense for northern mid-latitudes, with various high-  
920 precision and high-accuracy surface stations, but are sparser at tropical latitudes and in the Southern Hemisphere  
921 (Dlugokencky et al., 2011). Recently, the density of atmospheric observations has increased in the tropics due to satellite-  
922 based platforms that provide column-average CH<sub>4</sub> mixing ratios. Despite continuous improvements in the precision and  
923 accuracy of space-based measurements (e.g., Buchwitz et al., 2016), systematic errors greater than several ppb on total  
924 column observations can still limit the usage of such data to constrain surface emissions (e.g., Jacob et al., 2022). The  
925 development of robust bias corrections on existing data can help overcome this issue (e.g., Inoue et al., 2016) and satellite  
926 data are now widely used in atmospheric inversions where they provide more global information on the distribution of fluxes  
927 and highly complement the surface networks (e.g., Lu et al., 2021).

928 In this context, the Global Carbon Project (GCP) seeks to develop a complete picture of the carbon cycle by  
929 establishing common, consistent scientific knowledge to support policy development and actions to mitigate greenhouse gas  
930 emissions to the atmosphere (www.globalcarbonproject.org). The objective of this paper is to analyse and synthesise the  
931 current knowledge of the global CH<sub>4</sub> budget, by gathering results of observations and models to better understand and

Mis en forme : Retrait : Première ligne : 1,27 cm

Supprimé: debate

Supprimé: synthesize

Supprimé: methane

Supprimé: in order

quantify the main robust features of this budget, its remaining uncertainties, and to make recommendations for improvement. We combine results from a large ensemble of bottom-up approaches (e.g., process-based models for natural wetlands, data-driven approaches for other natural sources, inventories of anthropogenic emissions and biomass burning, and atmospheric chemistry models), and top-down approaches (including CH<sub>4</sub> atmospheric observing networks, atmospheric inversions inferring emissions and sinks from the assimilation of atmospheric observations into models of atmospheric transport and chemistry). The focus of this work is to update the previous assessment made for the period 2000-2017 (Saunois et al., 2020) to the more recent 2000-2020 period. More in-depth analyses of trends and year-to-year changes are left to future publications. Our current paper is a living review, published at about four-year intervals, to provide an update and new synthesis of available observational, statistical, and model data for the overall CH<sub>4</sub> budget and its individual components. Kirschke et al. (2013) was the first CH<sub>4</sub> budget synthesis followed by Saunois et al. (2016) and Saunois et al. (2020), with companion papers by Stavert et al. (2021) on regional CH<sub>4</sub> budgets and Jackson et al. (2020) focusing on the last year of the budget (2017). Saunois et al. (2020) covered 2000-2017 and reported CH<sub>4</sub> emissions and sinks for three time periods: 1) the latest calendar decade at that time (2000-2009), 2) data for the latest available decade (2008-2017), and 3) the latest available year (2017) at the time. Here, the Global Methane Budget (GMB) covers 2000-2020 split into the 2000-2009 decade, the 2010-2019 decade (where data are available), the year 2020 affected by COVID induced changes in human activity, and briefly for 2021-2023 as per data availability (Section 6). The CH<sub>4</sub> budget is presented at global, latitudinal, and regional scales and data can be downloaded from <https://doi.org/10.18160/GCP-CH4-2024/> (Martinez et al., 2024). Six sections follow this introduction. Section 2 presents the methodology used in the budget: units, definitions of source categories, regions, data analysis; and discusses the delay between the period of study of the budget and the release date. Section 3 presents the current knowledge about CH<sub>4</sub> sources and sinks based on the ensemble of bottom-up approaches reported here (models, inventories, data-driven approaches). Section 4 reports atmospheric observations and top-down atmospheric inversions gathered for this paper. Section 5, based on Sections 3 and 4, provides the updated analysis of the global CH<sub>4</sub> budget by comparing bottom-up and top-down estimates and highlighting differences. Section 6 discusses the recent changes in atmospheric CH<sub>4</sub> in relation with changes in CH<sub>4</sub> sources and sinks. Finally, Section 7 discusses future developments, missing components, and the most critical remaining uncertainties based on our update to the global CH<sub>4</sub> budget.

## 2 Methodology

### 2.1 Units used

Unless specified, fluxes are expressed in teragrams of CH<sub>4</sub> per year ( $1 \text{ Tg CH}_4 \text{ yr}^{-1} = 10^{12} \text{ g CH}_4 \text{ yr}^{-1}$ ), while atmospheric mixing ratios are expressed as dry air mole fractions, in parts per billion (ppb), with atmospheric CH<sub>4</sub> annual increases,  $G_{\text{ATM}}$ , expressed in ppb yr<sup>-1</sup>. In the tables, we present mean values and ranges for the two decades 2000-2009 and 2010-

Supprimé :

Supprimé: methane

Supprimé: on decadal budgets and on the update of the previous assessment made for the period 2003-2012 to the more recent 2008-2017 decade. More in-depth analysis of trends and year-to-year changes are left to future publications. The regional budget is further discussed in Stavert et al. (2020). Our current paper is a living review, published at about three-year intervals, to provide an update and new synthesis of available observational, statistical

Supprimé: Kirschke et al. (2013) was the first CH<sub>4</sub> budget synthesis and was followed by Saunois et al. (2016). Kirschke et al. (2013) reported decadal mean CH<sub>4</sub> emissions and sinks from 1980 to 2009 based on bottom-up and top-down approaches. Saunois et al. (2016) reported methane emissions for three time periods: 1) the last calendar decade (2000-2009), 2) the last available decade (2003-2012), and 3) the last available year (2012) at the time. Here, we update reporting methane emissions and sinks for 2000-2009 decade, for the most recent 2008-2017 decade where data are available, and for the year 2017, reducing the time lag between the last reported year and analysis. The methane budget is presented here at global and latitudinal scales and data can be downloaded from <https://doi.org/10.18160/GCP-CH4-2019> (Saunois et al., 2019). Five

Mis en forme : Retrait : Première ligne : 1,27 cm

Supprimé: of

Supprimé: methane

Supprimé: methane

Supprimé: 6

Supprimé: methane

Mis en forme : Police : Gras, Couleur de police : Noir

Mis en forme : Normal, Espace Avant : 24 pt, Après : 12 pt, Paragraphes solidaires, Bordure : Haut: (Pas de bordure), Bas: (Pas de bordure), Gauche: (Pas de bordure), Droite: (Pas de bordure), Entre : (Pas de bordure)

Supprimé: lTg

Supprimé: =

Supprimé: gCH<sub>4</sub>

Supprimé: concentrations

Supprimé: methane

Supprimé: ,

Supprimé: 2008-2017



2019, together with results for the most recent available year (2020). Results obtained from previous syntheses (i.e., Saunois et al., 2020 and Saunois et al., 2016) are also given for the decade 2000-2009. Following Saunois et al. (2016) and considering that the number of studies is often relatively small for many individual source and sink estimates, uncertainties are reported as minimum and maximum values of the available studies, given in brackets. In doing so, we acknowledge that we do not consider the uncertainty of the individual estimates, and we express uncertainty as the range of available mean estimates, i.e., differences across measurements/methodologies considered. These minimum and maximum values are those presented in Section 2.5 and exclude identified outliers.

The CH<sub>4</sub> emission estimates are provided with up to three significant digits, for consistency across all budget flux components and to ensure the accuracy of aggregated fluxes. Nonetheless, given the values of the uncertainties in the CH<sub>4</sub> budget, we encourage the reader to consider not more than two digits as significant for the global total budget.

## 2.2 Period of the budget and availability of data

The bottom-up estimates rely on global anthropogenic emission inventories, an ensemble of process-based models for wetlands emissions, and published estimates in the literature for other natural sources. The global gridded anthropogenic inventories (see Section 3.1.1) are updated irregularly, generally every 3 to 5 years. The last reported years of available inventories were 2018 or 2019 when we started the top-down modelling activity. In order to cover the period 2000-2020, it was necessary to extrapolate the anthropogenic inventory EDGARv6 (Crippa et al., 2021) to 2020 to use it as prior information for the anthropogenic emissions in the atmospheric inversion systems as explained in the supplementary material. The land surface (wetland) models were run over the full period 2000-2020 using dynamical wetland areas derived by remote sensing data or other models of flooded area variability (Sect. 3.2.1).

The atmospheric inversions run until mid-2021, but the last year of reported inversion results is 2020, which represents a three-year lag with the present. This is due to the long time period it takes to acquire atmospheric in-situ data and integrate models. Even though satellite observations are processed operationally and are generally available with a latency of days to weeks, by contrast surface observations can lag from months to years because of the time for flask analyses and data quality checks in (mostly) non-operational chains. In addition, the final six months of inversions must be generally ignored because the estimated fluxes are not constrained by as many observations as the previous periods. Lastly, this budget presents an extended synthesis of the most recent development regarding inland water emissions (Sect. 3.2.2) and corrections associated with double counting with wetlands.

## 2.3 Definition of regions

Geographically, emissions are reported globally and for three latitudinal bands (90°S-30°N, 30-60°N, 60-90°N, only for gridded products). When extrapolating emission estimates forward in time (see Sect. 3.1.1), and for the regional budget presented by Stavert et al. (2021), a set of 19 regions (oceans and 18 continental regions, see supplementary Fig. S3) were

Supprimé: 2017

Supprimé: .

Supprimé: methane

Mis en forme : Police :Gras, Couleur de police : Noir

Mis en forme : Normal, Espace Avant : 12 pt, Après : 12 pt, Paragraphes solidaires, Bordure : Haut: (Pas de bordure), Bas: (Pas de bordure), Gauche: (Pas de bordure), Droite: (Pas de bordure), Entre : (Pas de bordure)

Supprimé: surface land

Supprimé: 2012, 2014

Supprimé: 2016

Supprimé: this study. For this budget, in

Supprimé: reported

Supprimé: (

Supprimé: 2017),

Supprimé: some of these datasets as

Supprimé: Sect. 3.1.1.

Supprimé: land

Supprimé: 2017

Supprimé: (Sect.

Supprimé: For the top-down estimates, we use

Supprimé: covering 2000-2017. The simulations

Supprimé: 2018

Supprimé: 2017

Supprimé: two and a half

Supprimé: , a two-year shorter lag than for the last release (Saunois et al., 2016). Satellite

Supprimé: linked to operational data chains

Supprimé: after the recording of the spectra. Surface

Supprimé: The

Supprimé: are

Supprimé: (spin down)

Mis en forme : Police :Gras, Couleur de police : Noir

Mis en forme : Normal, Espace Avant : 12 pt, Après : 12 pt, Paragraphes solidaires, Bordure : Haut: (Pas de bordure), Bas: (Pas de bordure), Gauche: (Pas de bordure), Droite: (Pas de bordure), Entre : (Pas de bordure)

Supprimé:

Mis en forme : Police :Gras, Couleur de police : Noir

Supprimé: Geographically, emissions are reported globally and for three latitudinal bands (90°S-30°N, 30-60°N, 60-90°N, only for gridded products). When extrapolating emission estimates forward in

used. As anthropogenic emissions are often reported by country, we define these regions based on a country list (Table S1). This approach was compatible with all top-down and bottom-up approaches considered. The number of regions was chosen to be close to the widely used TransCom inter-comparison map (Gurney et al., 2004) but with subdivisions to separate the contribution from important countries or regions for the CH<sub>4</sub> cycle (China, South Asia, Tropical America, Tropical Africa, United States of America, and Russia). The resulting region definition is the same as that used for the Global Carbon Project (GCP) N<sub>2</sub>O budget (Tian et al., 2020). Compared to Saunois et al. (2020), the Oceania region has been replaced by Australasia including only Australia and New Zealand. Other territories formerly in Oceania were included in Southeast Asia.

## 2.4 Definition of source and sink categories

CH<sub>4</sub> is emitted by different processes (i.e., biogenic, thermogenic, or pyrogenic) and can be of anthropogenic or natural origin. Biogenic CH<sub>4</sub> is the final product of the decomposition of organic matter by methanogenic *Archaea* in anaerobic environments, such as water-saturated soils, swamps, rice paddies, marine and freshwater sediments, landfills, sewage and wastewater treatment facilities, or inside animal digestive systems. Thermogenic methane is formed on geological time scales by the breakdown of buried organic matter due to heat and pressure deep in the Earth's crust. Thermogenic CH<sub>4</sub> reaches the atmosphere through marine and land geological gas seeps. These CH<sub>4</sub> emissions are increased by human activities, for instance, the exploitation and distribution of fossil fuels. Pyrogenic CH<sub>4</sub> is produced by the incomplete combustion of biomass and other organic materials. Peat fires, biomass burning in deforested or degraded areas, wildfires, and biofuel burning are the largest sources of pyrogenic CH<sub>4</sub>. CH<sub>4</sub> hydrates, ice-like cages of frozen CH<sub>4</sub> found in continental shelves and slopes and below sub-sea and land permafrost, can be of either biogenic or thermogenic origin. Each of these three process categories has both anthropogenic and natural components.

In the following, we present the different CH<sub>4</sub> sources depending on their anthropogenic or natural origin, which is relevant to climate policy. Compared to the previous budgets, marginal changes have been made regarding source categories (naming and grouping), to reflect the improved estimates for inland water sources and their indirect anthropogenic component. In the previous Global Methane Budgets (Saunois et al., 2016, 2020), natural and anthropogenic emissions were split in a way that did not correspond exactly to the definition used by the UNFCCC following the IPCC guidelines (IPCC, 2006), where, for pragmatic reasons, all emissions from managed land are typically reported as anthropogenic. For instance, we considered all wetlands as natural emissions, despite some wetlands being on managed land and their emissions being partly reported as anthropogenic in UNFCCC national communications. The human induced perturbation of climate, atmospheric CO<sub>2</sub>, and nitrogen and sulfur deposition may cause changes in wetland sources we classified as natural. Following our previous definition, emissions from wetlands, inland freshwaters, thawing permafrost, or geological leaks are accountable for "natural" emissions, even though we acknowledge that climate change and other human perturbations (e.g., eutrophication) may cause changes in those emissions. CH<sub>4</sub> emissions from reservoirs were also considered as natural even though reservoirs

Mis en forme : Police :Gras, Couleur de police : Noir

Supprimé:

Mis en forme : Normal, Espace Avant : 12 pt, Après : 12 pt, Paragraphes solidaires, Bordure : Haut: (Pas de bordure), Bas: (Pas de bordure), Gauche: (Pas de bordure), Droite: (Pas de bordure), Entre : (Pas de bordure)

Mis en forme : Police :Gras, Couleur de police : Noir

Mis en forme : Police :Gras, Couleur de police : Noir

Supprimé: Methane

Supprimé: methane

Supprimé: methane

Supprimé: methane

Supprimé: methane

Supprimé: material

Supprimé: methane. Methane

Supprimé: trapped methane

Supprimé: methane

Supprimé: for

Supprimé: Here, "natural sources" refer to pre-agricultural emissions even if they are perturbed by anthropogenic climate change,

Supprimé: "anthropogenic sources" are caused by direct human activities since pre-industrial/pre-agricultural time (3000-2000 BC, Nakazawa et al., 1993) including agriculture, waste management and fossil fuel related activities. Natural emissions are split between "wetland" and "other natural" emissions (e.g., non-wetland inland waters, wild animals, termites, land geological sources, oceanic geological and biogenic sources, and terrestrial permafrost). ... [85]

Supprimé: ... [86]

Supprimé: (IPCC, 2006),

Supprimé: , which is not the case here.

Supprimé: consider

Mis en forme : Indice

Supprimé: the

Supprimé: water or

Supprimé: will be

Supprimé: in

Supprimé: ,

Supprimé: – a

Supprimé: perturbation –

Supprimé: increasing

Supprimé: from these sources. Methane

Supprimé: are

are human-made. Indeed, since the 2019 refinement to the IPCC guidelines (IPCC, 2019) emissions from reservoirs and other flooded lands are considered to be anthropogenic by the UNFCCC and should be reported as such. However these estimates are not provided by inventories and not systematically reported by all countries (especially non Annex-I countries). In this budget we rename “natural sources” to “natural and indirect anthropogenic sources” to acknowledge that CH<sub>4</sub> emissions from reservoirs, as well as from water bodies that were perturbed by agricultural activities (drainage, eutrophication, land use change) are indirect anthropogenic emissions. As a result, here, “natural and indirect anthropogenic sources” refer to “emissions that do not directly originate from fossil, agricultural, waste, and biomass burning sources” even if they are perturbed by anthropogenic activities and climate change. Natural and indirect anthropogenic emissions are split between “Wetlands and Inland Freshwaters” and “Other natural” emissions (e.g., wild animals, termites, land geological sources, oceanic geological and biogenic sources, and terrestrial permafrost). “Anthropogenic direct sources” are caused by direct human activities since pre-industrial/pre-agricultural time (3000-2000 BC, Nakazawa et al., 1993) including agriculture, waste management, fossil fuel-related activities and biofuel and biomass burning (yet we acknowledge that a small fraction of wildfires are naturally ignited). Direct anthropogenic emissions are split between: “Agriculture and waste emissions”, “Fossil fuel emissions”, and “Biomass and biofuel burning emissions”, assuming that all types of fires are caused by anthropogenic activities. To conclude, this budget reports “direct anthropogenic”, and “natural and indirect anthropogenic” methane emissions for the five main source categories explained above for both bottom-up and top-down approaches.

The sinks of methane are split into the soil uptake that can be derived from land-surface models in the bottom-up budget, and the chemical sinks. The chemical sinks are estimated by either chemistry climate or chemistry transport models in the bottom-up budget, and are further detailed in terms of vertical distribution (troposphere and stratosphere) and oxidants.

Bottom-up estimates of CH<sub>4</sub> emissions for some processes are derived from process-oriented models (e.g., biogeochemical models for wetlands, models for termites), inventory models (agriculture and waste emissions, fossil fuel emissions, biomass and biofuel burning emissions), satellite-based models (large scale biomass burning), or observation-based upscaling models for other sources (e.g., inland water, geological sources). From these bottom-up approaches, it is possible to provide estimates for more detailed source subcategories inside each main category described above (see budget in Table 3). However, the total CH<sub>4</sub> emission derived from the sum of independent bottom-up estimates remains unconstrained.

For atmospheric inversions (top-down approach), atmospheric methane concentration observations provide a constraint on the global methane total source if we assume the global sink is known (OH and other oxidant prescribed), or inversions are optimising also for the chemical sink. OH estimates are constrained by methyl chloroform-inversion (Montzka et al., 2011; Rigby et al., 2017; Patra et al., 2021). The inversions reported in this work solve for the total net CH<sub>4</sub> flux at the surface (sum of sources minus soil uptake) (e.g., Pison et al., 2013), or a limited number of source categories (e.g., Bergamaschi et al., 2013). In most of the inverse systems the atmospheric oxidant concentrations were prescribed with pre-optimized or scaled OH fields, and thus the atmospheric sink is not optimised. The assimilation of CH<sub>4</sub> observations alone, as reported in

**Supprimé:** , and

**Supprimé:** (IPCC, 2006, 2019)

**Supprimé:** by UNFCCC.¶

Following Sauniois et al. (2016), we report

**Supprimé:** and natural methane

**Supprimé:** for

**Supprimé:**

**Supprimé:** methane

**Supprimé:** sub-categories

**Supprimé:** GCP

**Supprimé:** methane

**Supprimé:** For atmospheric inversions (top-down approach) the situation is different. Atmospheric observations provide a constraint on the global total source and a reasonable constraint on the global sink derived from methyl chloroform (Montzka et al., 2011; Rigby et al., 2017). The inversions reported in this work solve either for a total methane flux (e.g. Pison et al., 2013), or for a limited number of source categories (e.g. Bergamaschi et al., 2013). In most of the inverse systems the atmospheric oxidant concentrations are prescribed with pre-optimized or scaled OH fields, and thus the atmospheric sink is not solved. The assimilation of CH<sub>4</sub> observations alone, as reported in this synthesis, can help to separate sources with different locations or temporal variations but cannot fully separate individual sources as they often overlap in space and time in some regions. Top-down global and regional methane emissions per source category were obtained directly from gridded optimized fluxes, wherever an inversion had solved for the separate five main GCP categories. Alternatively, if an inversion only solved for total emissions (or for categories other than the main five described above), then the prior contribution of each source category at the spatial resolution of the inversion was scaled by the ratio of the total (or embedding category) optimized flux divided by the total (or embedding category) prior flux (Kirschke et al., 2013). In other words, the prior relative mix of sources at model resolution is kept while updating total emissions with atmospheric observations. The soil uptake was provided separately in order to report total gross surface emissions instead of net fluxes (sources minus soil uptake).¶

1229 this synthesis, can help to separate sources with different locations or temporal variations but cannot fully separate individual  
1230 sources where they overlap in space and time in some regions. Top-down global and regional CH<sub>4</sub> emissions per source  
1231 category were nevertheless obtained from gridded optimised fluxes, for the inversions that separated emissions into the five  
1232 main GCP categories. Alternatively, for the inversion that only solved for total emissions (or for other categories other than  
1233 the five described above), the prior contribution of each source category at the spatial resolution of the inversion was scaled  
1234 by the ratio of the total (or embedding category) optimised flux divided by the total (or embedding category) prior flux  
1235 (Kirschke et al., 2013). In other words, the prior relative mix of sources at model resolution is kept in each grid cell while  
1236 total emissions are given by the atmospheric inversions. The soil uptake was provided separately to report total gross surface  
1237 emissions instead of net fluxes (sources minus soil uptake).

1238 In summary, bottom-up models and inventories emissions are presented for all relevant source processes and grouped if  
1239 needed into the five main categories defined above. Top-down inversion emissions are reported globally and, for the five  
1240 main emission categories.

1241 **2.5 Processing of emission maps and box-plot representation of emission budgets**

1242 Common data analysis procedures have been applied to the different bottom-up models, inventories and atmospheric  
1243 inversions whenever gridded products exist. Gridded emissions from atmospheric inversions, land-surface models for  
1244 wetland or biomass burning were provided at the monthly scale. Emissions from anthropogenic inventories are usually  
1245 available as yearly estimates. These monthly or yearly fluxes were provided on a 1°x1° grid or re-gridded to 1°x1°, then  
1246 converted into units of Tg CH<sub>4</sub> per grid cell. Inversions with a resolution coarser than 1° were downscaled to 1° by each  
1247 modelling group. Land fluxes in coastal pixels were reallocated to the neighbouring land pixel according to our 1° land-sea  
1248 mask, and vice-versa for ocean fluxes. Annual and decadal means used for this study were computed from the monthly or  
1249 yearly gridded 1°x1° maps.

1250 Budgets are presented as boxplots with quartiles (25%, median, 75%), outliers, and minimum and maximum values without  
1251 outliers. Outliers were determined as values below the first quartile minus three times the interquartile range, or values above  
1252 the third quartile plus three times the interquartile range. Mean values reported in the tables are represented as “+” symbols  
1253 in the corresponding figures.

1254 **3 Methane sources and sinks: bottom-up estimates**

1255 For each source category, a short description of the relevant processes, original data sets (measurements, models) and related  
1256 methodology are given. More detailed information can be found in original publication references, in Annex A2 where the  
1257 sources of data used to estimate the different sources and sinks are summarised and compared with those used in Saunois et  
1258 al. (2020) and in the Supplementary Material of this study, when specified in the text. The emission estimates for each source

Supprimé: for

Supprimé: globally

Supprimé: inversions

Supprimé: only

Mis en forme : Police :Gras, Couleur de police : Noir

Mis en forme : Normal, Espace Avant : 12 pt, Après : 12 pt, Paragraphes solidaires, Bordure : Haut: (Pas de bordure), Bas: (Pas de bordure), Gauche: (Pas de bordure), Droite: (Pas de bordure), Entre : (Pas de bordure)

Supprimé: modeling

Supprimé: inter-quartile

Supprimé: inter-quartile

Mis en forme : Police :Gras, Couleur de police : Noir

Mis en forme : Normal, Espace Avant : 24 pt, Après : 12 pt, Paragraphes solidaires, Bordure : Haut: (Pas de bordure), Bas: (Pas de bordure), Gauche: (Pas de bordure), Droite: (Pas de bordure), Entre : (Pas de bordure)

Mis en forme : Police :Gras, Couleur de police : Noir

Supprimé: and

Supprimé: supplementary material

Supprimé: .

category are compared with Saunois et al. (2020) in Table 3 and with Saunois et al. (2016) in Table S12 for the decade 2000-2009.

### 3.1 Anthropogenic direct sources

#### 3.1.1 Global inventories

The main bottom-up global inventory datasets covering direct anthropogenic emissions from all sectors (Table 1) are from the United States Environmental Protection Agency (USEPA, 2019), the Greenhouse gas and Air pollutant Interactions and Synergies (GAINS) model developed by the International Institute for Applied Systems Analysis (IIASA) (Höglund-Isaksson et al., 2020) and the Emissions Database for Global Atmospheric Research (EDGARv6 and v7, Crippa et al., 2021, 2023) compiled by the European Commission Joint Research Centre (EC-JRC) and Netherlands Environmental Assessment Agency (PBL). We also used the Community Emissions Data System for historical emissions (CEDS) (Hoesly et al., 2018) developed for climate modelling and the Food and Agriculture Organization (FAO) FAOSTAT emission database (Tubiello et al., 2022), which covers emissions from agriculture and land use (including peatland fires and biomass fires). These inventories are not independent as they may use the same activity data or emission factors, as discussed below.

These inventory datasets report emissions from fossil fuel production, transmission, and distribution; livestock enteric fermentation; manure management and application; rice cultivation; solid waste and wastewater. Since the level of detail provided by country and by sector varies among inventories, the data were reconciled into common categories according to Table S2. For example, agricultural waste burning emissions treated as a separate category in EDGAR, GAINS and FAO, are included in the biofuel sector in the USEPA inventory and in the agricultural sector in CEDS. The GAINS, EDGAR and FAO estimates of agricultural waste burning were excluded from this analysis (these amounted to 1-3 Tg CH<sub>4</sub> yr<sup>-1</sup> in recent decades) to prevent any potential overlap with separate estimates of biomass burning emissions (e.g., GFEDv4.1s, Giglio et al. (2013); van der Werf et al (2017)). In the inventories used here, emissions for a given region/country and a given sector are usually calculated following IPCC methodology (IPCC, 2006), as the product of an activity factor and its associated emission factor. An abatement coefficient may also be used, to account for any regulations implemented to control emissions (see e.g., Höglund-Isaksson et al., 2015). These datasets differ in their assumptions and data used for the calculation; however, they are not completely independent because they often use the same activity data and some of them follow the same IPCC guidelines (IPCC, 2006). While the USEPA inventory adopts emissions reported by the countries to the UNFCCC, other inventories (FAOSTAT, EDGAR and the GAINS model) produce their own estimates using a consistent approach for all countries, typically IPCC Tier 1 methods or deriving IPCC Tier 2 emission factors from country-specific information using a consistent methodology. These other inventories compile country-specific activity data and emission factor information or, if not available, adopt IPCC default factors (Tibrewal et al., 2024; Oreggioni et al., 2021; Höglund-Isaksson et al., 2020; Tubiello, 2019). CEDS takes a different approach (Hoesly et al., 2018) and combines data from GAINS, EDGAR and FAO depending on the sector. Then their first estimates are scaled to match other individual or region-

Mis en forme : Police :Gras, Couleur de police : Noir

Mis en forme : Normal, Espace Avant : 12 pt, Après : 12 pt, Paragraphes solidaires, Bordure : Haut: (Pas de bordure), Bas: (Pas de bordure), Gauche: (Pas de bordure), Droite: (Pas de bordure), Entre : (Pas de bordure)

Mis en forme : Police :Gras, Couleur de police : Noir

Supprimé: gathered

Mis en forme : Police :Gras, Couleur de police : Noir

Supprimé: The main bottom-up global inventory datasets covering anthropogenic emissions from all sectors (Table 1) are from the United States Environmental Protection Agency (USEPA, 2012), the Greenhouse gas and Air pollutant Interactions and Synergies (GAINS) model developed by the International Institute for Applied Systems Analysis (IIASA) (Gomez Sanabria et al., 2018; Höglund-Isaksson, 2012, 2017) and the Emissions Database for Global Atmospheric Research (EDGARv3.2.2, Janssens-Maenhout et al., 2019) compiled by the European Commission Joint Research Centre (EC-JRC) and Netherlands' Environmental Assessment Agency (PBL). We also used the Community Emissions Data System for historical emissions (CEDS) (Hoesly et al., 2018) developed for climate modelling and the Food and Agriculture Organization (FAO) dataset emission database (Tubiello, 2019), which only covers emissions from agriculture and land use (including peatland and biomass fires).

Supprimé: and

Supprimé:

Supprimé: inadvertent

Supprimé: .

Supprimé: ).

Supprimé: (IPCC, 2006),

Supprimé: an

Supprimé: for this activity.

Supprimé: is

Supprimé: additionally

Supprimé: (see e.g. Höglund-Isaksson et al., 2015).

Supprimé: (IPCC, 2006), and, at least for agriculture, use the same FAOSTAT activity data.

Supprimé: .

Supprimé: (Höglund-Isaksson, 2012; Janssens-Maenhout et al., 2019; Tubiello, 2019).

Supprimé: starting

Supprimé: pre-existing default emission estimates; for methane, a combination of

Supprimé: is used,



specific inventory values when available. This process maintains the spatial information in the default emission inventories while preserving consistency with country level data. The **FAOSTAT dataset** (hereafter **FAO-CH<sub>4</sub>**) provides estimates at the country level and is limited to agriculture (**CH<sub>4</sub> emissions from** enteric fermentation, manure management, rice cultivation, energy usage, burning of crop residues, and prescribed burning of savannahs) and land-use (**peatland fires and** biomass burning). FAO-CH<sub>4</sub> uses activity data mainly from the FAOSTAT crop and livestock production database, as reported by countries to FAO (Tubiello et al., 2013), and applies mostly the Tier 1 IPCC methodology for emissions factors (IPCC, 2006), which depends on geographic location and development status of the country. For manure, the country-scale temperature was obtained from the FAO global agro-ecological zone database (GAEZv3.0, 2012). Although country emissions are reported annually to the UNFCCC by annex I countries, and episodically by non-annex I countries, data gaps of those national inventories do not allow the inclusion of these estimates in this analysis.

In this budget, we use the following versions of these **inventories that were available at the start and during the analysis** (see Table 1):

- **EDGARv6** which provides yearly gridded emissions by sectors from 1970 to 2018 (Crippa et al., 2021; Oreggioni et al., 2021; EDGARv6 website [https://edgar.jrc.ec.europa.eu/dataset\\_ghg60](https://edgar.jrc.ec.europa.eu/dataset_ghg60); Monforti Ferrario et al., 2021).
- **EDGARv7**, which provides yearly gridded emissions by sectors from 1970 to 2020 (monthly for some sectors), but emissions from fossil fuel energy are not separated (oil and gas, and coal are lumped together - see Table S2) (EDGARv7 website [https://edgar.jrc.ec.europa.eu/dataset\\_ghg70](https://edgar.jrc.ec.europa.eu/dataset_ghg70); Crippa et al., 2023).
- **GAINS model scenario version 4.0** (Höglund-Isaksson et al., 2020) which provides an annual sectorial gridded product from 1990 to 2020 both by country and gridded. USEPA (USEPA, 2019), which provides 5-year sectorial totals by country from 1990 to 2020 (estimates from 2015 onward are a projection), with no gridded distribution available. The USEPA dataset was linearly interpolated to provide yearly values from 1990-2020.
- **CEDS version v 2021\_04\_21** which provides gridded monthly and annual country-based emissions by sectors from 1970 to 2019 (Hoesly et al., 2018; O'Rourke et al., 2021). Fossil fuel emissions for 2020 have been updated using the methodology described for CO in Zheng et al. (2023).
- **FAO-CH<sub>4</sub>** (database accessed in December 2022, FAO, 2022) containing annual country level data for the period 1961-2020, for rice, manure, and enteric fermentation; and 1990-2020 for burning savannah, crop residue and non-agricultural biomass burning.

### 3.1.2 Total anthropogenic direct emissions

We calculated separately the total anthropogenic emissions for each inventory by adding its values for "Agriculture and waste", "Fossil fuels" and "Biofuels" with additional large-scale biomass burning emissions data (Sect. 3.1.5). This method avoids double counting and ensures consistency within each inventory. This approach was used for the EDGARv6 and v7, CEDS and GAINS inventories, but we kept the USEPA inventory as originally reported because it includes its own estimates

Supprimé: FAOSTATdataset

Supprimé: was used to provide

Supprimé: of methane emissions

Supprimé: but

Supprimé: (Tubiello et al., 2013),

Supprimé: (IPCC, 2006),

Supprimé: depend

Supprimé: necessary

Supprimé: (GAEZv3.0, 2012).

Supprimé: databases

Supprimé: <#>EDGARv4.3.2 which provides yearly gridded emissions by sectors from 1970 to 2012 (Janssens-Maenhout et al., 2019).  
<#>GAINS model scenario ECLIPSE v6 (Gomez Sanabria et al., 2018; Höglund-Isaksson, 2012, 2017) which provides both annual sectoral totals by country from 1990 to 2015 and a projection for 2020 (that assumes current emission legislation for the future) and an annual sectorial gridded product from 1990 to 2015.

Mis en forme : Hiérarchisation + Niveau : 1 + Style de numérotation : Puce + Alignement : 0,63 cm + Retrait : 1,27 cm

Supprimé: (USEPA, 2012),

Supprimé: 2005

Supprimé: ,

Supprimé: <#>CEDS version 2017-05-18 which provides both gridded monthly and annual country-based emissions by sectors from 1970 to 2014 (Hoesly et al., 2018).

Mis en forme : Hiérarchisation + Niveau : 1 + Style de numérotation : Puce + Alignement : 0,63 cm + Retrait : 1,27 cm

Supprimé: February 2019, (FAO, 2019))

Supprimé: 2016

Supprimé: 2016

Supprimé: In order to report emissions for the period 2000-2017, we extended and interpolated some of the datasets as explained in [87]

Mis en forme ... [88]

Mis en forme : Police :Gras, Couleur de police : Noir

Mis en forme : Police :Gras, Couleur de police : Noir

Mis en forme ... [89]

Supprimé: In order to avoid double counting and ensure ... [90]

Supprimé: biofuels

Supprimé: the range of available

Supprimé: .

Supprimé: EGDARv4.3.2

1443 of biomass burning emissions. FAO-CH<sub>4</sub> was only included in the range reported for the “Agriculture and waste” category.  
1444 For the latter, we calculated the range and mean value as the sum of the mean and range of the three anthropogenic  
1445 subcategory estimates “Enteric fermentation and Manure”, “Rice”, and “Landfills and Waste”. The values reported for the  
1446 upper-level anthropogenic categories (“Agriculture and waste”, “Fossil fuels” and “Biomass burning & biofuels”) are  
1447 therefore consistent with the sum of their subcategories, although there might be small percentage differences between the  
1448 reported total anthropogenic emissions and the sum of the three upper-level categories. This approach provides a more  
1449 accurate representation of the range of emission estimates, avoiding an artificial expansion of the uncertainty attributable to  
1450 subtle differences in the definition of sub-sector categorisations between inventories.

1451 Based on the ensemble of databases detailed above, total direct anthropogenic emissions were 358 [329-387] Tg CH<sub>4</sub> yr<sup>-1</sup>  
1452 for the decade 2010-2019 (Table 3, including biomass and biofuel burning) and 331 [305-365] Tg CH<sub>4</sub> yr<sup>-1</sup> for the decade  
1453 2000-2009. Our estimate for the 2000-2009 decade is within the range of Sauniois et al. (2020) (334 [321-358]), Sauniois et  
1454 al. (2016) (338 Tg CH<sub>4</sub> yr<sup>-1</sup> [329-342]) and Kirschke et al. (2013) (331 Tg CH<sub>4</sub> yr<sup>-1</sup> [304-368]) for the same period. The  
1455 slightly larger range reported herein with respect to previous estimates is due to the USEPA lower estimate for agriculture,  
1456 waste and fossil emissions associated with the lowest estimate of biomass burning.  
1457 Figure 2 (left) summarises or projects global CH<sub>4</sub> emissions of anthropogenic sources (including biomass and biofuel  
1458 burning) by different datasets between 2000 and 2050. The datasets consistently estimate total anthropogenic emissions of  
1459 ~300 Tg CH<sub>4</sub> yr<sup>-1</sup> in 2000. For the Sixth Assessment Report of the IPCC, seven main Shared Socioeconomic Pathways  
1460 (SSPs) were defined for future climate projections in the Coupled Model Intercomparison Project 6 (CMIP6) (Gidden et al.,  
1461 2019; O'Neill et al., 2016) ranging from 1.9 to 8.5 W m<sup>-2</sup> radiative forcing by the year 2100 (as shown by the number in the  
1462 SSP names). For the 1970-2015 period, historical emissions used in CMIP6 (Feng et al., 2019) combine anthropogenic  
1463 emissions from CEDS (Hoesly et al., 2018) and a climatological value from the GFEDv4.1s biomass burning inventory (van  
1464 Marle et al., 2017). The harmonised scenarios used for CMIP6 activities start in 2015 at 388 Tg CH<sub>4</sub> yr<sup>-1</sup>, which corresponds  
1465 to the higher range of our estimates. Since CH<sub>4</sub> emissions continue to track scenarios that assume no or minimal climate  
1466 policies (SSP5 and SSP3), it may indicate that climate policies, when present, have not yet produced sufficient results to  
1467 change the emissions trajectory substantially (Nisbet et al., 2019). After 2015, the SSPs span a range of possible outcomes,  
1468 but current emissions appear likely to follow the higher-emission trajectories over the next decade in terms of trend, and the  
1469 peak year has not yet been reached. This illustrates the challenge of methane mitigation that lies ahead to help reach the  
1470 goals of the Paris Agreement. In addition, estimates of methane atmospheric concentrations (Meinshausen et al., 2017, 2020)  
1471 from the harmonised scenarios (Riahi et al., 2017) indicate that observations of global CH<sub>4</sub> concentrations fall well within  
1472 the range of scenarios (Fig. 2 right). The CH<sub>4</sub> concentrations are estimated using a simple exponential decay with inferred  
1473 natural emissions (Meinshausen et al., 2011), and the emergence of any trend between observations and scenarios needs to  
1474 be confirmed in the following years. However, the current observed concentrations and emissions estimates lie in the upper  
1475 range of the former RCPs scenarios starting in 2005 (Fig. S1). In the future, it will be important to monitor the trends from

**Supprimé:** Based on the ensemble of databases detailed above, total anthropogenic emissions were 366 [349-393] Tg CH<sub>4</sub> yr<sup>-1</sup> for the decade 2008-2017 (Table 3, including biomass and biofuel burning) and 334 [321-358] Tg CH<sub>4</sub> yr<sup>-1</sup> for the decade 2000-2009. Our estimate for the preceding decade is statistically consistent with Sauniois et al. (2016) (338 Tg CH<sub>4</sub> yr<sup>-1</sup> [329-342]) and Kirschke et al. (2013) (331 Tg CH<sub>4</sub> yr<sup>-1</sup> [304-368]) for the same period. The slightly larger range reported herein with respect to previous estimates is mainly due to a larger range in the biomass burning estimates, as more biomass burning products are included in this update. The range associated with our estimates (~10-12%) is smaller than the range reported in Höglund-Isaksson et al. (2015) (~20%), perhaps because they analysed data from a wider range of inventories and projections, plus this study was referenced to one year only (2005) rather than averaged over a decade, as done here.<sup>4</sup>  
Figure 2 (top panels) summarizes global methane emissions of anthropogenic sources (including biomass and biofuel burning) by different datasets between 2000 and 2050. The datasets consistently estimate total anthropogenic emissions of ~300 Tg CH<sub>4</sub> yr<sup>-1</sup> in 2000. The main discrepancy between the inventories is their trend after 2005, with the lowest emissions projected by GAINS and the largest by CEDS. For the Sixth Assessment Report of the IPCC, seven main Shared Socioeconomic Pathways (SSPs) were defined for future climate projections in the Coupled Model Intercomparison Project 6 (CMIP6) (Gidden et al., 2019; O'Neill et al., 2016) ranging from 1.9 to 8.5 W m<sup>-2</sup> radiative forcing by the year 2100 (as shown by the number in the SSP names). The trends in methane emissions from 2010 estimated by current inventories track the pathways with the highest radiative forcing in 2100 (based on the unharmonized scenarios developed by Integrated Assessment Models, top left panel). For the 1970-2015 period, historical emissions used in CMIP6 (Feng et al., 2019) combine anthropogenic emissions from CEDS (Hoesly et al., 2018) and a climatological value from the GFEDv4.1s biomass burning inventory (van Marle et al., 2017). The CEDS anthropogenic emissions estimates, based on EDGARv4.2, are 10-20 Tg higher than the more recent EDGARv4.3.2 (van Marle et al., 2017). Harmonized scenarios used for CMIP6 activities start in 2015 at 388 Tg CH<sub>4</sub> yr<sup>-1</sup>. Since methane emissions continue to track scenarios that assume no or minimal climate policies, it may indicate that climate policies, when present, have not yet produced sufficient results to change the emissions trajectory substantially (Nisbet et al., 2019). After 2015, the SSPs span a range of possible outcomes, but current emissions appear likely to follow the higher-emission trajectories over the next decade. This illustrates the challenge of methane mitigation that lies ahead to help reach the goals of the Paris agreement. In addition, estimates of methane atmospheric concentrations from the unharmonized scenarios (Riahi et al., 2017) indicate that observations of global methane concentrations fall well within the range of scenarios (Fig. 2 bottom). The methane concentrations are estimated using a simple exponential decay with inferred natural emissions (Meinshausen et al., 2011), and the emergence of any trend between observations and scenarios needs to be confirmed in the following years. In the future, it will be important to monitor the trends from year 2015 (the Paris agreement) estimated in inventories and from atmospheric observations, and compare them to various scenarios.<sup>4</sup>

1532 2015 (the Paris Agreement) and from 2020 (Global Methane Pledge) estimated in inventories and from atmospheric  
1533 observations, and compare them to various scenarios.

### 1534 3.1.3 Fossil fuel production and use

1535 Most anthropogenic **CH<sub>4</sub>** emissions related to fossil fuels come from the exploitation, transportation, and usage of coal, oil,  
1536 and natural gas. Additional emissions reported in this category include small industrial contributions such as **the** production  
1537 of chemicals and metals, fossil fuel fires (e.g., underground coal mine fires and the Kuwait oil and gas fires), and transport  
1538 (road and non-road transport). **CH<sub>4</sub>** emissions from the oil **processing** industry (e.g., refining) and production of charcoal  
1539 are estimated to be a few Tg CH<sub>4</sub> yr<sup>-1</sup> only and are included in the transformation industry sector in the inventory. Fossil  
1540 fuel fires are included in the **subcategory** “Oil & Gas”. Emissions from industries, road and, non-road transport are reported  
1541 apart from the two main **subcategories** “Oil & Gas” and “Coal”, as in Saunois et al. (2020) and contrary to Saunois et al.  
1542 (2016); each of **these** amounts to about 2 to 5 Tg CH<sub>4</sub> yr<sup>-1</sup> (Table 3). The large range (1-9 Tg CH<sub>4</sub> yr<sup>-1</sup>) is attributable to  
1543 difficulties in allocating some sectors to these sub-sectors consistently among the different inventories (See Table S2). The  
1544 spatial distribution of **CH<sub>4</sub>** emissions from fossil fuels is presented in Fig. 3 based on the mean gridded maps provided by  
1545 CEDS, **EDGARv6**, and GAINS for the **2010-2019** decade; USEPA lacks a gridded product.

1546 Global mean emissions from fossil fuel-related activities, other industries and transport are estimated from the four global  
1547 inventories (Table 1) to be of **120 [117-125]** Tg CH<sub>4</sub> yr<sup>-1</sup> for the **2010-2019** decade (Table 3), but with large differences in  
1548 the rate of change during this period across inventories. The sector accounts on average for **34%** (range **31-42%**) of total  
1549 global anthropogenic emissions.

#### 1550 Coal mining.

1551 During mining, **CH<sub>4</sub>** is emitted primarily from ventilation shafts, where large volumes of air are pumped **in and out** of the  
1552 mine to keep the CH<sub>4</sub> mixing ratio below 0.5% to avoid accidental ignition, and from dewatering operations. In countries of  
1553 the Organization for Economic Co-operation and Development (OECD), **coalbed CH<sub>4</sub> is often extracted as fuel up to ten**  
1554 **years before the coal mine starts operation, thereby reducing the CH<sub>4</sub> channelled through** ventilation shafts **during mining.**  
1555 **In many countries, large quantities of ventilation air CH<sub>4</sub> are still released to the atmosphere or flared, despite efforts to**  
1556 **extend coal mine gas** recovery under the UNFCCC Clean Development Mechanisms (<http://cdm.unfccc.int>). **CH<sub>4</sub>** leaks also  
1557 occur during post-mining handling, processing, and transportation. Some CH<sub>4</sub> is released from coal waste piles and  
1558 abandoned mines; while emissions from these sources were believed to be low (**IPCC, 2000**), recent work has estimated  
1559 these at 22 billion m<sup>3</sup> (**compared to** 103 billion m<sup>3</sup> from functioning coal mines) in 2010 with emissions projected to increase  
1560 into the future (**Kholod et al., 2020**).  
1561 **In 2020, more than 35% (IEA, 2023a)** of the world’s electricity is still produced from coal. This contribution grew in the  
1562 2000s at the rate of several **percent** per year, driven by Asian economic growth where large reserves exist, but global coal  
1563

Mis en forme : Police :Gras, Couleur de police : Noir

Mis en forme : Police :Gras, Couleur de police : Noir, Motif :  
Transparente (Orange clair)

Mis en forme : Normal, Espace Avant : 12 pt, Après : 12 pt,  
Paragraphe solidaires, Bordure : Haut: (Pas de bordure), Bas:  
(Pas de bordure), Gauche: (Pas de bordure), Droite: (Pas de  
bordure), Entre : (Pas de bordure)

Supprimé: methane

Supprimé: Methane

Supprimé: .

Supprimé: sub-category

Supprimé: and

Supprimé: sub-categories

Supprimé: theses

Supprimé: 0-12

Supprimé: methane

Supprimé: EDGARv4.3.2

Supprimé: 2008-2017

Supprimé:

Supprimé: 128 [113-154]

Supprimé: 2008-2017

Supprimé: 35

Supprimé: 30

Supprimé: methane

Supprimé: into

Supprimé: methane released from

Supprimé: is in principle used as fuel, but in

Supprimé: it is

Supprimé: emitted into

Supprimé: the

Supprimé: for coalmine

Supprimé: Methane

Supprimé: (IPCC, 2000),

Supprimé: against

Supprimé: (Kholod et al., 2020).

Mis en forme : Anglais (G.B.)

Supprimé: In 2017, almost 40% (IEA, 2019b)

Supprimé: per cent

1594 consumption declined between 2014 and 2020. In 2020, the top ten largest coal producing nations accounted for ~90% of  
1595 total world CH<sub>4</sub> emissions from coal mining; among them, the top three producers (China, United States of America, and  
1596 India) produced almost two-thirds (66%) of the world's coal (IEA, 2021).

1597 Global estimates of CH<sub>4</sub> emissions from coal mining show a reduced range of 37-44 Tg CH<sub>4</sub> yr<sup>-1</sup> for 2010-2019, compared  
1598 to the previous estimate for 2008-2017 in Sauniois et al. (2020) reporting a range of 29-61 Tg CH<sub>4</sub> yr<sup>-1</sup> for 2008-2017. This  
1599 reduced range probably results from using similar activity data (mostly from IEA statistics) in the different inventories. The  
1600 highest value of the range in Sauniois et al. (2020) came from the CEDS inventory while the lowest came from USEPA.  
1601 CEDS seems to have revised downward their estimate compared to the previous version used in Sauniois et al. (2020). There  
1602 were previously large discrepancies in Chinese coal emissions, with a large overestimation from EDGARv4.2 on which  
1603 CEDS was based. As highlighted by Liu et al. (2021a), a county-based inventory of Chinese methane emissions also  
1604 confirms the overestimation of previous EDGAR inventories and estimated total anthropogenic Chinese emissions at  
1605 38.2±5.5 Tg CH<sub>4</sub> yr<sup>-1</sup> for 2000-2008 (Liu et al., 2021a). Coal mining emission factors depend strongly on the type of coal  
1606 extraction (underground mining emits up to 10 times more than surface mining), the geological underground structure  
1607 (region-specific), history (basin uplift), and the quality of the coal (brown coal (lignite) emits more than hard coal  
1608 (anthracite)). Finally, the different emission factors derived for coal mining is the main reason for the differences between  
1609 inventories globally (Fig. 2).

1610 For the 2010-2019 decade, methane emissions from coal mining represent 33% of total fossil fuel-related emissions of CH<sub>4</sub>  
1611 (40 [37-44] Tg CH<sub>4</sub> yr<sup>-1</sup>). An additional very small source corresponds to fossil fuel fires (mostly underground coal fires,  
1612 ~0.15 Tg yr<sup>-1</sup> any year in EDGARv7).

## 1613 Oil and natural gas systems.

1615 This sub-category includes emissions from both conventional and shale oil and gas exploitation. Natural gas is composed  
1616 primarily of CH<sub>4</sub>, so both fugitive and planned emissions during the drilling of wells in gas fields, extraction, transportation,  
1617 storage, gas distribution, end use, and incomplete combustion in gas flares emit CH<sub>4</sub> (Lamb et al., 2015; Shorter et al., 1996).  
1618 Persistent fugitive emissions (e.g., due to leaky valves and compressors) should be distinguished from intermittent emissions  
1619 due to maintenance (e.g., purging and draining of pipes) or incidents. During transportation, fugitive emissions can occur in  
1620 oil tankers, fuel trucks and gas transmission pipelines, attributable to corrosion, manufacturing, and welding faults.  
1621 According to Lelieveld et al. (2005), CH<sub>4</sub> fugitive emissions from gas pipelines should be relatively low, however, old  
1622 distribution networks in some cities may have higher rates, especially those with cast-iron and unprotected steel pipelines  
1623 (Phillips et al., 2013). Measurement campaigns in cities within the USA (e.g., McKain et al., 2015) and Europe (e.g.,  
1624 Defratyka et al., 2021) revealed that significant emissions occur in specific locations (e.g., storage facilities, city natural gas  
1625 fueling stations, well and pipeline pressurisation/depressurisation points, sewage systems, and furnaces of buildings) along  
1626 the distribution networks (e.g., Jackson et al., 2014a; McKain et al., 2015; Wunch et al., 2016). However, CH<sub>4</sub> emissions

**Supprimé:** since

**Supprimé:** 2018

**Supprimé:** methane

**Supprimé:** for

**Supprimé:** USA

**Supprimé:**

**Supprimé:** 64

**Supprimé:** (IEA, 2019a).

**Supprimé:** Global estimates of CH<sub>4</sub> emissions from coal mining show a large range of 29-61 Tg CH<sub>4</sub> yr<sup>-1</sup> for 2008-2017, in part due to the lack of comprehensive data from all major producing countries. The highest value of the range comes from the CEDS inventory while the lowest comes from USEPA. CEDS seems to have overestimated coal mining emissions from China by almost a factor of 2, most likely due to its dependence on the EDGARv4.2 emission inventory. As highlighted by Sauniois et al. (2016), a county-based inventory of Chinese methane emissions also confirms the overestimate of about +38% with total anthropogenic emissions estimated at 43±6 Tg CH<sub>4</sub> yr<sup>-1</sup> (Peng et al., 2016). EDGARv4.2 inventory follows the IPCC guidelines and uses European averaged emission factor for CH<sub>4</sub> from coal production to substitute missing data for China, which appears to be overestimated by a factor of approximately two. These differences highlight significant errors resulting from the use of emission factors, and that applying "Tier 1" approaches for coal mine emissions is not sufficiently accurate as stated by the IPCC guidelines. The newly released version of EDGARv4.3.2 used here has revised China coal methane emission factors downwards and distributed them to more than 80 times more coal mining locations in China. Coal mining emission factors depend strongly on the type of coal extraction (underground mining emits up to 10 times more than surface mining), the geological underground structure (region-specific), history (basin uplift), and the quality of the coal (brown coal emits more than hard coal). Finally, coal mining is the main source explaining the differences between inventories globally (Fig. 2).

**Supprimé:** 2008-2017

**Supprimé:**

**Supprimé:** methane (42

**Supprimé:** , range of 29-61

**Supprimé:** 2012, EDGARv4.3.2).

**Mis en forme :** Police :Glas

**Supprimé:** Natural gas is comprised primarily of methane, so both fugitive and planned emissions during the drilling of wells in gas fields, extraction, transportation, storage, gas distribution, end use, and incomplete combustion of gas flares emit methane (Lamb et al., 2015; Shorter et al., 1996). Persistent fugitive emissions (e.g., due to leaky valves and compressors) should be distinguished from intermittent emissions due to maintenance (e.g. purging and draining of pipes). During transportation, fugitive emissions can occur in oil tankers, fuel trucks and gas transmission pipelines, attributable to corrosion, manufacturing and welding faults. According to Lelieveld et al. (2005), CH<sub>4</sub> fugitive emissions from gas pipelines should be relatively low, however distribution networks in older cities may have higher rates, especially those with cast-iron and unprotected

vary significantly from one city to another depending, in part, on the age of city infrastructure and the quality of its maintenance, making urban emissions difficult to scale-up from measurement campaigns, although attempts have been made (e.g., Defratyka et al., 2021). In many facilities, such as gas and oil fields, refineries, and offshore platforms, most of the associated and other waste gas generated will be flared for security reasons with almost complete conversion to CO<sub>2</sub>, however, due to the large quantities of waste gas generated, small fractions of gas still being vented make up relatively large quantities of methane. These two processes are usually considered together in inventories of oil and gas industries. In addition, single-point failure of natural gas infrastructure can leak CH<sub>4</sub> at high rate for months, such as at the Aliso Canyon blowout in the Los Angeles, CA (Conley et al., 2016) or the shale gas well blowout in Ohio (Pandey et al., 2019), thus hampering emission control strategies. Production of natural gas from the exploitation of hitherto unproductive rock formations, especially shale, began in the 1970s in the US on an experimental or small-scale basis, and then, from the early 2000s, exploitation started at a large commercial scale. The shale gas contribution to total dry natural gas production in the United States reached 82% in 2023, growing rapidly from 48% in 2013 (IEA, 2023b). The possibly larger emission factors from shale gas compared to conventional gas, have been widely debated (e.g., Cathles et al., 2012; Howarth, 2019; Lewan, 2020). However, the latest studies tend to infer similar emission factors in a narrow range of 1-3% (Alvarez et al., 2018; Peischl et al., 2015; Zavala-Araiza et al., 2015), different from the widely spread rates of 3-17% from previous studies (e.g., Caulton et al., 2014; Schneising et al., 2014).

CH<sub>4</sub> emissions from oil and natural gas systems vary greatly in different global inventories (67 to 80 Tg yr<sup>-1</sup> in 2020, Table 3). The inventories generally rely on the same sources and magnitudes for activity data, with the derived differences therefore resulting primarily from different methodologies and parameters used, including emission factors. Those factors are country- or even site-specific and the few field measurements available often combine oil and gas activities (Brandt et al., 2014), resulting in high uncertainty in emission estimates for many major oil and gas producing countries. Depending on the region, the IPCC 2006 default emission factors may vary by two orders of magnitude for oil production and one order for gas production. For instance, the GAINSv4.0 estimate of CH<sub>4</sub> emissions from US oil and gas systems in 2015 is 16 Tg, which is almost twice as high as EDGARv8.0 at 8.4 Tg and USEPA (UNFCCC, 2023) at 9.5 Tg. The difference can partly be explained by GAINS using a bottom-up methodology to derive country- and year-specific flows of associated petroleum gas and attributing these to recovery/reinjection, flaring or venting (Höglund-Isaksson, 2017), and partly to GAINS using a higher emission factor for unconventional gas production (Höglund-Isaksson et al., 2020). Recent quantifications using satellite observations and inversion estimate a relatively stable trend for US oil and gas systems emissions since 2010, with Lu et al. (2023) estimating 14.6 Tg for 2010, 15.9 Tg for 2014 and 15.6 Tg for 2019, Shen et al. (2022) estimating a mean of 12.6 Tg for 2018-2020, and Maasakkers et al (2021) a mean of 11.1 Tg for 2010 to 2015. The stable top-down trend for the US appears not well captured in the bottom-up inventories from GAINS and EDGAR, which tend to show an increasing trend driven by increase in production volumes.

**Supprimé:** Methane emissions from oil and natural gas systems vary greatly in different global inventories (72 to 97 Tg yr<sup>-1</sup> in 2017, Table 3). The inventories generally rely on the same sources and magnitudes for activity data, with the derived differences therefore resulting primarily from different methodologies and parameters used, including emission factors. Those factors are country- or even site-specific and the few field measurements available often combine oil and gas activities (Brandt et al., 2014) and remain largely unknown for most major oil- and gas-producing countries. Depending on the country, the reported emission factors may vary by two orders of magnitude for oil production and by one order of magnitude for gas production (Table SI-5.1 of Höglund-Isaksson (2017)). The GAINS estimate of methane emissions from oil production, for instance, is twice as high as EDGARv4.3.2. For natural gas, the uncertainty is of a similar order of magnitude. During oil extraction, natural gas generated can be either recovered (re-injected or utilized as an energy source) or not recovered (flared or vented to the atmosphere). The recovery rates vary from one country to another (being much higher in the USA, Europe and Canada than elsewhere), and from one type of oil to another: flaring is less common for heavy oil wells than for conventional ones (Höglund-Isaksson et al., 2015). Considering recovery rates could lead to two-times-higher methane emissions accounting for country-specific rates of generation and recovery of associated gas than when using default values (Höglund-Isaksson, 2012). This difference in methodology explains, in part, why GAINS estimates are higher than those of EDGARv4.3.2.†

Most studies (Alvarez et al., 2018; Brandt et al., 2014; Jackson et al., 2014b; Karion et al., 2013; Moore et al., 2014; Olivier & Janssens-Maenhout, 2014; Pétron et al., 2014; Zavala-Araiza et al., 2015), albeit not all (Allen et al., 2013; Cathles et al., 2012; Peischl et al., 2015), suggest that methane emissions from oil and gas industry are underestimated by inventories and agencies, including the USEPA. Zavala-Araiza et al. (2015) showed that a few high-emitting facilities, i.e., super-emitters, neglected in the inventories, dominated USA emissions. These high emitting points, located on the conventional part of the facility, could be avoided through better operating conditions and repair of malfunctions. As USA production increases, absolute methane emissions almost certainly increase, as well USA crude oil production doubled over the last decade and natural gas production rose more than 50% (EIA, 2019). However, global implications of the rapidly growing shale gas activity in the US remains to be determined precisely.†



Most studies (Alvarez et al., 2018; Brandt et al., 2014; Jackson et al., 2014b; Karion et al., 2013; Moore et al., 2014; Olivier and Janssens-Maenhout, 2014; Pétron et al., 2014; Zavala-Araiza et al., 2015), albeit not all (Allen et al., 2013; Cathles et al., 2012; Peischl et al., 2015), suggest that the methane emissions from oil and gas industry are underestimated by inventories, industries, and agencies, including the USEPA. Lauvaux et al. (2022) showed that emissions from a few high-emitting facilities, i.e., super-emitters ( $> 20 \text{ t hr}^{-1}$ ), which are usually sporadic in nature, and not accounted for in the inventories, could represent 8-12% of global oil & gas emissions, or around  $8 \text{ Tg CH}_4 \text{ yr}^{-1}$ . These high emitting points, located on the conventional part of the facilities, could be avoided through better operating conditions and repair of malfunctions. Over the last decade, absolute  $\text{CH}_4$  emissions almost certainly increased, since USA crude oil production doubled and natural gas production rose by about 50% (IEA, 2023a). However, global implications of the rapidly growing shale gas activity in the US remain to be determined precisely.

For the 2010-2019 decade,  $\text{CH}_4$  emissions from upstream and downstream oil and natural gas sectors are estimated to represent about 56% of total fossil  $\text{CH}_4$  emissions ( $67 [57-74] \text{ Tg CH}_4 \text{ yr}^{-1}$ , Table 3) based on global inventories, with a lower uncertainty range than for coal emissions for most countries. However, it is worth noting that  $8 \text{ Tg CH}_4 \text{ yr}^{-1}$  should be added on top of this estimate to acknowledge the ultra-emitters contribution, as done in Tibrewal et al (2024).

### 3.1.4 Agriculture and waste sector

This main category includes  $\text{CH}_4$  emissions related to livestock production (i.e., enteric fermentation in ruminant animals and manure management), rice cultivation, landfills, and wastewater handling. Of these activities, globally and in most countries, livestock is by far the largest source of  $\text{CH}_4$ , followed by waste handling and rice cultivation. Conversely, field burning of agricultural residues is a minor source of  $\text{CH}_4$  reported in emission inventories, (a few  $\text{Tg}$  at the global scale). The spatial distribution of  $\text{CH}_4$  emissions from agriculture and waste handling is presented in Fig. 3 based on the mean gridded maps provided by CEDS, EDGARv6 and GAINS over the 2010-2019 decade.

Global emissions from agriculture and waste for the period 2010-2019 are estimated to be  $211 [195-231] \text{ Tg CH}_4 \text{ yr}^{-1}$  (Table 3), representing 60% of total direct anthropogenic emissions. Agriculture emissions amount to  $144 \text{ Tg CH}_4 \text{ yr}^{-1}$ , 40% of the direct anthropogenic emissions, with the rest coming from the fossil fuel sector (34%), waste (19%) and biomass (5%) and biofuel (3%) burning.

**Livestock: Enteric fermentation and manure management.** Domestic ruminants such as cattle, buffalo, sheep, goats, and camels emit  $\text{CH}_4$  as a by-product of the anaerobic microbial activity in their digestive systems (Johnson et al., 2002). The very stable temperatures (about  $39^\circ\text{C}$ ) and pH (6.5-6.8) within the rumen of domestic ruminants, along with a constant plant matter flow from grazing (cattle graze many hours per day), allow methanogenic *Archaea* residing within the rumen to produce  $\text{CH}_4$ .  $\text{CH}_4$  is released from the rumen mainly through the mouth of multi-stomached ruminants (eructation, ~90% of emissions) or absorbed in the blood system. The  $\text{CH}_4$  produced in the intestines and partially transmitted through the rectum is only ~10%.

- Supprimé: 2008-2017
- Supprimé: methane
- Supprimé: 63
- Supprimé:  $80 \text{ Tg CH}_4 \text{ yr}^{-1}$ , range of 68-92
- Supprimé: ),
- Supprimé: sectors
- Mis en forme : Police :Gras, Couleur de police : Noir
- Mis en forme : Police :Gras, Couleur de police : Noir, Motif : Transparente (Orange clair)
- Mis en forme : Normal, Espace Avant : 12 pt, Après : 12 pt, Paragraphes solidaires, Bordure : Haut: (Pas de bordure), Bas: (Pas de bordure), Gauche: (Pas de bordure), Droite: (Pas de bordure), Entre : (Pas de bordure)
- Supprimé: methane
- Mis en forme : Non Exposant/ Indice
- Supprimé: .
- Supprimé: methane
- Supprimé: EDGARv4.3.2
- Supprimé: 2008-2017
- Supprimé: 2008-2017
- Supprimé: 206
- Supprimé: range 191-223,
- Supprimé: 56
- Supprimé: methane
- Supprimé: (Johnson et al., 2002).
- Supprimé: values
- Supprimé: methane. Methane
- Supprimé: 87
- Supprimé: methane
- Supprimé: 13

1852 The total number of livestock continues to grow steadily. There are currently (2020) about 1.5 billion cattle globally, almost  
 1853 1.3 billion sheep, and nearly as many goats (<http://www.fao.org/faostat/en/#data/GE>). Livestock numbers are linearly related  
 1854 to CH<sub>4</sub> emissions in inventories using the Tier 1 IPCC approach such as FAOSTAT. In practice, some non-linearity may  
 1855 arise due to dependencies of emissions on the total weight of the animals and their diet, which are better captured by Tier 2  
 1856 and higher approaches. Cattle, due to their large population, large individual size, and particular digestive characteristics,  
 1857 account for the majority of enteric fermentation CH<sub>4</sub> emissions from livestock worldwide (Tubiello, 2019; FAO, 2022),  
 1858 particularly in intensive agricultural systems in wealthier and emerging economies, including the United States (USEPA,  
 1859 2016). CH<sub>4</sub> emissions from enteric fermentation also vary from one country to another as cattle may experience diverse  
 1860 living conditions that vary spatially and temporally, especially in the tropics (Chang et al., 2019).  
 1861 Anaerobic conditions often characterise manure decomposition in a variety of manure management systems globally (e.g.,  
 1862 liquid/slurry treated in lagoons, ponds, tanks, or pits), with the volatile solids in manure producing CH<sub>4</sub>. In contrast, when  
 1863 manure is handled as a solid (e.g., in stacks or dry-lots) or deposited on pasture, range, or paddock lands, it tends to  
 1864 decompose aerobically and to produce little or no CH<sub>4</sub>. However aerobic decomposition of manure tends to produce nitrous  
 1865 oxide (N<sub>2</sub>O), which has a larger global warming impact than CH<sub>4</sub>. Ambient temperature, moisture, energy contents of the  
 1866 feed, manure composition, and manure storage or residency time affect the amount of CH<sub>4</sub> produced. Despite these  
 1867 complexities, most global datasets used herein apply a simplified IPCC Tier 1 approach, where amounts of manure treated  
 1868 depend on animal numbers and simplified climatic conditions by country.  
 1869 Global CH<sub>4</sub> emissions from enteric fermentation and manure management are estimated in the range of 114-124 Tg CH<sub>4</sub> yr<sup>-1</sup>  
 1870 for the year 2020, in the GAINS model and CEDS, USEPA, FAO-CH<sub>4</sub> and EDGARv7 inventories. Using the Tier 2  
 1871 method adopted from the 2019 Refinement to 2006 IPCC guidelines, a recent study (Zhang et al., 2022) estimated that  
 1872 global CH<sub>4</sub> emissions from livestock increased from 31.8 [26.5–37.1] (mean [minimum–maximum of 95% confidence  
 1873 interval) Tg CH<sub>4</sub> yr<sup>-1</sup> in 1890 to 131.7 [109.6–153.7] Tg CH<sub>4</sub> yr<sup>-1</sup> in 2019, a fourfold increase in the past 130 years. Chang  
 1874 et al. (2021) estimates enteric fermentation and manure management emissions based on mixed Tier 1&2 and Tier1  
 1875 approaches and calculate livestock emissions being 120±13 and 136±15 Tg CH<sub>4</sub> yr<sup>-1</sup> respectively for 2018. Chang et al.  
 1876 (2021) and Zhang et al. (2022) estimates for 2018 or 2019 are on average a bit higher than the inventories estimates but in  
 1877 agreement considering the uncertainties.  
 1878 For the period 2010-2019, we estimated total emissions of 112 [107-118] Tg CH<sub>4</sub> yr<sup>-1</sup> for enteric fermentation and manure  
 1879 management, about one third of total global anthropogenic emissions.  
 1880 **Rice cultivation.** Most of the world's rice is grown in flooded paddy fields (Baicich, 2013). The water management systems,  
 1881 particularly flooding, used to cultivate rice are one of the most important factors influencing CH<sub>4</sub> emissions and one of the  
 1882 most promising approaches for CH<sub>4</sub> emission mitigation: periodic drainage and aeration not only cause existing soil CH<sub>4</sub> to  
 1883 oxidise, but also inhibit further CH<sub>4</sub> production in soils (Simpson et al., 1995; USEPA, 2016; Zhang, 2016). Upland rice  
 1884 fields are not typically flooded, and therefore are not a significant source of CH<sub>4</sub>. Other factors that influence CH<sub>4</sub> emissions

Supprimé: 2017

Supprimé: (Tubiello, 2019),

Supprimé: (USEPA, 2016). Methane

Supprimé: (Chang et al., 2019).

Supprimé: characterize

Supprimé: Global methane emissions from enteric fermentation and manure management are estimated in the range of 99-115 Tg CH<sub>4</sub> yr<sup>-1</sup>, for the year 2010, in the GAINS model and CEDS, USEPA, FAO-CH<sub>4</sub> and EDGARv4.3.2 inventories. These values are slightly higher than the IPCC Tier 2 estimate of Dangal et al. (2017) (95.7 Tg CH<sub>4</sub>/yr for 2010) and the IPCC Tier 3 estimates of Herrero et al. (2013) (83.2 Tg CH<sub>4</sub> yr<sup>-1</sup> for 2000), but in agreement with the recent IPCC Tier 2 estimate of Chang et al. (2019) (99± 12 Tg CH<sub>4</sub> yr<sup>-1</sup> for 2012).

Supprimé: 2008-2017

Supprimé: 111 [106-116

Supprimé: Most of the world's rice is grown in flooded paddy fields (Baicich, 2013). The water management systems, particularly flooding, used to cultivate rice are one of the most important factors influencing CH<sub>4</sub> emissions and one of the most promising approaches for CH<sub>4</sub> emission mitigation: periodic drainage and aeration not only cause existing soil CH<sub>4</sub> to oxidize, but also inhibit further CH<sub>4</sub> production in soils (Simpson et al., 1995; USEPA, 2016; Zhang, 2016). Upland rice fields are not typically flooded, and therefore are not a significant source of CH<sub>4</sub>. Other factors that influence CH<sub>4</sub> emissions from flooded rice fields include fertilization practices (i.e. the use of urea and organic fertilizers), soil temperature, soil type (texture and aggregated size), rice variety and cultivation practices (e.g., tillage, seeding, and weeding practices) (Conrad et al., 2000; Kai et al., 2011; USEPA, 2011; Yan et al., 2009). For instance, methane emissions from rice paddies increase with organic amendments (Cai et al., 1997) but can be mitigated by applying other types of fertilizers (mineral, composts, biogas residues) or using wet seeding (Wassmann et al., 2000).

from flooded rice fields include fertilisation practices (i.e., the use of urea and organic fertilisers), soil temperature, soil type (texture and aggregated size), rice variety and cultivation practices (e.g., tillage, seeding, and weeding practices) (Conrad et al., 2000; Kai et al., 2011; USEPA, 2011; Yan et al., 2009). For instance, CH<sub>4</sub> emissions from rice paddies increase with organic amendments (Cai et al., 1997) but can be mitigated by applying other types of fertilisers (mineral, composts, biogas residues) or using wet seeding (Wassmann et al., 2000).

The geographical distribution of rice emissions has been assessed by global (e.g., Janssens-Maenhout et al., 2019; Tubiello, 2019; USEPA, 2012) and regional (e.g., Castelań-Ortega et al., 2014; Chen et al., 2013; Chen and Prinn, 2006; Peng et al., 2016; Yan et al., 2009; Zhang and Chen, 2014) inventories and land surface models (Li et al., 2005; Pathak et al., 2005; Ren et al., 2011; Spahni et al., 2011; Tian et al., 2010, 2011; Zhang, 2016). The emissions show a seasonal cycle, peaking in the summer months in the extra-tropics associated with monsoons and land management. Emissions from rice paddies are influenced not only by the extent of rice field area, but also by changes in the productivity of plants (Jiang et al., 2017) as these alter the CH<sub>4</sub> emission factor used in inventories. However, the inventories considered herein are largely based on IPCC Tier 1 methods, which mainly scale with cultivated areas and include regional specific emission factors but do not account for changes in plant productivity and detailed cultivation practices.

The largest emissions from rice cultivation are found in Asia accounting for 30 to 50% of global emissions (Fig. 3). The decrease of CH<sub>4</sub> emissions from rice cultivation over recent decades is confirmed in most inventories, because of the decrease in rice cultivation area, changes in agricultural practices, and a northward shift of rice cultivation since the 1970s, as in China (e.g., Chen et al., 2013).

Based on the global inventories considered in this study, global CH<sub>4</sub> emissions from rice paddies are estimated to be 32 [25-37] Tg CH<sub>4</sub> yr<sup>-1</sup> for the 2010-2019 decade (Table 3), or about 9% of total global anthropogenic emissions of CH<sub>4</sub>. These estimates are consistent with the 29 Tg CH<sub>4</sub> yr<sup>-1</sup> estimated for the year 2000 by Carlson et al. (2017).

**Waste management.** This sector includes emissions from managed and non-managed landfills (solid waste disposal on land), and wastewater handling, where all kinds of waste are deposited. CH<sub>4</sub> production from waste depends on the pH, moisture, and temperature of the material. The optimum pH for CH<sub>4</sub> emission is between 6.8 and 7.4 (Thorneloe et al., 2000). The development of carboxylic acids leads to low pH, which limits methane emissions. Food or organic waste, such as leaves and grass clippings, ferment quite easily, while wood and wood products generally ferment slowly, and cellulose and lignin even more slowly (USEPA, 2010a).

Waste management was responsible for about 11% of total global direct anthropogenic CH<sub>4</sub> emissions in 2000 (Kirschke et al., 2013). A recent assessment of CH<sub>4</sub> emissions in the USA found landfills to account for almost 26% of total USA anthropogenic CH<sub>4</sub> emissions in 2014, the largest contribution of any single CH<sub>4</sub> source in the United States of America (USEPA, 2016). In Europe, gas control has been mandatory on all landfills since 2009, and more importantly for CH<sub>4</sub> emissions, the EU Landfill Directive (1999) with subsequent amendments, has diverted most biodegradable waste away

**Supprimé:** The geographical distribution of rice emissions has been assessed by global (e.g. Janssens-Maenhout et al., 2019; Tubiello, 2019; USEPA, 2012) and regional (e.g. Castelań-Ortega et al., 2014; Chen et al., 2013; Chen and Prinn, 2006; Peng et al., 2016; Yan et al., 2009; Zhang and Chen, 2014) inventories or land surface models (Li et al., 2005; Pathak et al., 2005; Ren et al., 2011; Spahni et al., 2011; Tian et al., 2010, 2011; Zhang, 2016). The emissions show a seasonal cycle, peaking in the summer months in the extra-tropics associated with monsoons and land management. Similar to emissions from livestock, emissions from rice paddies are influenced not only by extent of rice field area (analogous to livestock numbers), but also by changes in the productivity of plants (Jiang et al., 2017) as these alter the CH<sub>4</sub> emission factor used in inventories. Nonetheless, the inventories considered herein are largely based on IPCC Tier 1 methods, which largely scale with cultivated areas but include regional specific emission factors.¶

The largest emissions from rice cultivation are found in Asia accounting for 30 to 50% of global emissions (Fig. 3). The decrease of CH<sub>4</sub> emissions from rice cultivation over recent decades is confirmed in most inventories, because of the decrease in rice cultivation area, changes in agricultural practices, and a northward shift of rice cultivation since the 1970s, as in China (e.g. Chen et al., 2013).¶

Based on the global inventories considered in this study, global methane emissions from rice paddies are estimated to be 30 [25-38] Tg CH<sub>4</sub> yr<sup>-1</sup> for the 2008-2017 decade (Table 3), or about 8% of total global anthropogenic emissions of methane. These estimates are consistent with the 29 Tg CH<sub>4</sub> yr<sup>-1</sup> estimated for the year 2000 by Carlson et al. (2017).¶

**Supprimé:** Methane

**Supprimé:** methane emission is between 6.8 and 7.4 (Thorneloe et al., 2000).

**Supprimé:** (USEPA, 2010a).

**Supprimé:** Waste management was responsible for about 11% of total global anthropogenic methane emissions in 2000 (Kirschke et al., 2013). A recent assessment of methane emissions in the U.S. found landfills to account for almost 26% of total U.S. anthropogenic methane emissions in 2014, the largest contribution of any single CH<sub>4</sub> source in the United States (USEPA, 2016). In Europe, gas control has been mandatory on all landfills since 2009, following the ambitious objective raised in the EU Landfill Directive (1999) to reduce landfilling of biodegradable waste to 65% below the 1990 level by 2016. This mitigation is attempted through source separation and treatment of separated biodegradable waste in composts, biogas, and paper recycling.¶

from landfills towards source separation, recycling, composting and energy recovery, and with a legally binding target not to landfill more than 10% of municipal solid waste by 2035.

Wastewater from domestic and industrial sources is treated in municipal sewage treatment facilities and private effluent treatment plants. The principal factor in determining the CH<sub>4</sub> generation potential of wastewater is the amount of degradable organic material in the wastewater. Wastewater with high organic content is treated anaerobically, which leads to increased emissions (André et al., 2014). Excessive and rapid urban development worldwide, especially in Asia and Africa, could enhance methane emissions from waste unless adequate mitigation policies are designed and implemented rapidly.

The GAINS model and CEDS and EDGAR inventories give robust emission estimates from solid waste in the range of 37-42 Tg CH<sub>4</sub> yr<sup>-1</sup> for the year 2019, and more uncertain wastewater emissions in the range 20-45 Tg CH<sub>4</sub> yr<sup>-1</sup>.

In our study, the global emission of CH<sub>4</sub> from waste management is estimated in the range of 56-80 Tg CH<sub>4</sub> yr<sup>-1</sup> for the 2010-2019 period with a mean value of 69 Tg CH<sub>4</sub> yr<sup>-1</sup>, about 19% of total global anthropogenic emissions.

### 3.1.5 Biomass and biofuel burning

This category includes CH<sub>4</sub> emissions from biomass burning in forests, savannahs, grasslands, peats, agricultural residues, as well as, from the burning of biofuels in the residential sector (stoves, boilers, fireplaces). Biomass and biofuel burning emit CH<sub>4</sub> under incomplete combustion conditions (i.e., when oxygen availability is insufficient for complete combustion), for example in charcoal manufacturing and smouldering fires. The amount of CH<sub>4</sub> emitted during the burning of biomass depends primarily on the amount of biomass, burning conditions, fuel moisture and the specific material burned.

In this study, we use large-scale biomass burning (forest, savannah, grassland, and peat fires) from five biomass burning inventories (described below) and the biofuel burning contribution from anthropogenic emission inventories (EDGARv6 and v7, CEDS, GAINS and USEPA). The spatial distribution of emissions from the burning of biomass and biofuel over the 2010-2019 decade is presented in Fig. 3 based on data listed in Table 1.

At the global scale, during the period of 2010-2019, biomass and biofuel burning generated CH<sub>4</sub> emissions of 28 [21-39] Tg CH<sub>4</sub> yr<sup>-1</sup> (Table 3), of which 30-50% is from biofuel burning.

**Biomass burning.** Fire is an important disturbance event in terrestrial ecosystems globally (van der Werf et al., 2010), and can be of either natural (typically ~10% of fires, ignited by lightning strikes or started accidentally) or anthropogenic origin (~90%, human initiated fires) (USEPA, 2010b, chapter 9.1). As previously noted all fires are accounted as anthropogenic in Table 3. Anthropogenic fires are concentrated in the tropics and subtropics, where forests, savannahs and grasslands may be burned to clear land for agricultural purposes or to maintain pastures and rangelands. Small fires associated with agricultural activity, such as field burning and agricultural waste burning, are often not well detected by remote sensing methods and are instead estimated based on cultivated area.

Supprimé: (André et al., 2014).

Supprimé: 29-41

Supprimé: 2005

Supprimé: 14-33

Supprimé: methane

Supprimé: 60-69

Supprimé: 2008-2017

Supprimé: 65

Supprimé: 12

Mis en forme : Police :Gras, Couleur de police : Noir

Mis en forme : Normal, Espace Avant : 12 pt, Après : 12 pt, Paragraphes solidaires, Bordure : Haut: (Pas de bordure), Bas: (Pas de bordure), Gauche: (Pas de bordure), Droite: (Pas de bordure), Entre : (Pas de bordure)

Supprimé: methane

Supprimé: emits methane

Supprimé: methane

Supprimé: EDGARv4.3.2

Supprimé: 2008-2017

Supprimé: 2008-2017

Supprimé: methane

Supprimé: 30 [26-40

Supprimé:

Supprimé: ¶  
**Biomass burning.** Fire is an important disturbance event in terrestrial ecosystems globally (van der Werf et al., 2010), and can be of either natural (typically ~10% of fires, ignited by lightning strikes or started accidentally) or anthropogenic origin (~90%, human initiated fires) (USEPA (2010b) chapter 9.1). Anthropogenic fires are concentrated in the tropics and subtropics, where forests, savannahs and grasslands may be burned to clear land for agricultural purposes or to maintain pastures and rangelands. Small fires associated with agricultural activity, such as field burning and agricultural waste burning, are often not well detected by remote sensing methods and are instead estimated based on cultivated area.¶  
Emission rates of biomass burning vary with biomass loading (depending on the biomes) at the location of the fire, the efficiency of the fire (depending on the vegetation type), the fire type (smouldering

1060 Emission rates of biomass burning vary with biomass loading (depending on the biomes) at the location of the fire, the  
1061 efficiency of the fire (depending on the vegetation type), the fire type (smouldering or flaming) and emission factor (mass  
1062 of the considered species / mass of biomass burned). Depending on the approach, these parameters can be derived using  
1063 satellite data and/or biogeochemical model, or through simpler IPCC default approaches.

1064 In this study, we use five products to estimate biomass burning emissions. The Global Fire Emission Database (GFED) is  
1065 the most widely used global biomass burning emission dataset and provides estimates from 1997 onwards. Here, we use  
1066 GFEDv4.1s (van der Werf et al., 2017), based on the Carnegie-Ames-Stanford-Approach (CASA) biogeochemical model  
1067 (van der Werf et al., 2010) driven by satellite derived vegetation characteristics and burned area mostly from the MODerate  
1068 resolution Imaging Sensor, MODIS (Giglio et al., 2013). GFEDv4.1s (with small fires) is available at a 0.25° resolution and  
1069 on a daily basis from 1997 to 2020. One characteristic of the GFEDv4.1s burned area is that small fires are better accounted  
1070 for compared to GFEDv4.1 (Randerson et al., 2012), increasing carbon emissions by approximately 35% at the global scale.  
1071 The latest version GFEDv5 (Chen et al., 2023) suggest 61% higher burned area than GFEDv4.1s, in closer agreement with  
1072 burned area products from higher resolution satellite sensors. The next budget would benefit from GFEDv5 to revisit the  
1073 estimates of biomass burning emissions (which would likely go up) based on more specific comparison studies.

1074 The Quick Fire Emissions Dataset (QFED) is calculated using the fire radiative power (FRP) approach, in which the thermal  
1075 energy emitted by active fires (detected by MODIS) is converted to an estimate of CH<sub>4</sub> flux using biome specific emissions  
1076 factors and a unique method of accounting for cloud cover. Further information related to this method and the derivation of  
1077 the biome specific emission factors can be found in Darmenov and da Silva (2015). Here we use the historical QFEDv2.5  
1078 product available daily on a 0.1x0.1 grid for 2000 to 2020.

1079 The Fire INventory from the National Center for Atmospheric Research (FINNv2.5, Wiedinmyer et al., 2023) provides  
1080 daily, 1 km resolution estimates of gas and particle emissions from open burning of biomass (including wildfire, agricultural  
1081 fires and prescribed burning) over the globe for the period 2002-2020. FINNv2.5 uses MODIS and VIIRS satellite  
1082 observations for active fires, land cover and vegetation density.

1083 We use v1.3 of the Global Fire Assimilation System (GFAS, Kaiser et al., 2012), which calculates emissions of biomass  
1084 burning by assimilating Fire Radiative Power (FRP) observations from MODIS at a daily frequency and 0.5° resolution and  
1085 is available for 2000-2020.

1086 The FAO-CH<sub>4</sub> yearly biomass burning emissions are based on the most recent MODIS 6 burned area products (Prosperi et  
1087 al., 2020), coupled with a pixel level (500 m) implementation of the IPCC Tier 1 approach, and are available from 1990 to  
1088 2020 (Table 1).

1089 The differences in emission estimates for biomass burning arise from specific geographical and meteorological conditions  
1090 and fuel composition, which strongly impact combustion completeness and emission factors. The latter vary greatly  
1091 according to fire type, ranging from 2.2 g CH<sub>4</sub> kg<sup>-1</sup> dry matter burned for savannah and grassland fires up to 21 g CH<sub>4</sub> kg<sup>-1</sup>  
1092 dry matter burned for peat fires (van der Werf et al., 2010). Biomass burning emissions encountered large inter annual

**Supprimé:** . Here, we use GFEDv4.1s (van der Werf et al., 2017), based on the Carnegie-Ames-Stanford-Approach (CASA) biogeochemical model and satellite derived estimates of burned area (from MODerate resolution Imaging Sensor, MODIS), fire activity and plant productivity. GFEDv4.1s (with small fires) is available at a 0.25° resolution and on a daily basis from 1997 to 2017. One characteristic of the GFEDv4.1s burned area is that small fires are better accounted compared to GFEDv4.1 (Randerson et al., 2012), increasing carbon emissions by approximately 35% at the global scale

**Supprimé:** methane

**Supprimé:** (Darmenov and da Silva, 2015). Here we use the historical QFEDv2.5 product available daily on a 0.1x0.1 grid for 2000 to 2017

**Supprimé:** The Fire Inventory from NCAR (FINN, Wiedinmyer et al., 2011) provides daily, 1km resolution estimates of gas and particle emissions from open burning of biomass (including wildfire, agricultural fires and prescribed burning) over the globe for the period 2002-2018. FINNv1.5 uses MODIS satellite observations for active fires, land cover and vegetation density. ¶

**Supprimé:** (GFAS, Kaiser et al., 2012),

**Supprimé:** 2016

**Supprimé:** ,

**Supprimé:** 500m

**Supprimé:** 2016

**Supprimé:** The differences in emission estimates for biomass burning arise from specific geographical and meteorological conditions and fuel composition, which strongly impact combustion completeness and emission factors. The latter vary greatly according to fire type, ranging from 2.2 g CH<sub>4</sub> kg<sup>-1</sup> dry matter burned for savannah and grassland fires up to 21 g CH<sub>4</sub> kg<sup>-1</sup> dry matter burned for peat fires (van der Werf et al., 2010). ¶



1125 variability related to meteorological conditions, with generally higher emissions during El-Nino periods as in 2019 (20 [14-  
1126 28] Tg CH<sub>4</sub> yr<sup>-1</sup>), 2015 (22 [15-28] Tg CH<sub>4</sub> yr<sup>-1</sup>) and 2010 to a lesser extent (18 [15-29] Tg CH<sub>4</sub> yr<sup>-1</sup>).  
1127 In this study, based on the five aforementioned products, biomass burning emissions are estimated at 17 Tg CH<sub>4</sub> yr<sup>-1</sup> [12-  
1128 24] for 2010-2019, representing about 5% of total global anthropogenic CH<sub>4</sub> emissions.

1130 **Biofuel burning.** Burning of biomass to produce energy for domestic, industrial, commercial, or transportation purposes is  
1131 hereafter called biofuel burning. A largely dominant fraction of CH<sub>4</sub> emissions from biofuel burning comes from domestic  
1132 cooking or heating in stoves, boilers, and fireplaces, mostly in open cooking fires where wood, charcoal, agricultural  
1133 residues, or animal dung are burned. It is estimated that more than two billion people, mostly in developing countries, use  
1134 solid biofuels to cook and heat their homes daily (André et al., 2014), and yet CH<sub>4</sub> emissions from biofuel combustion have  
1135 received relatively little attention. Biofuel burning estimates are gathered from the CEDS, USEPA, GAINS and EDGAR  
1136 inventories. Due to the sectoral breakdown of the EDGAR and CEDS inventories the biofuel component of the budget has  
1137 been estimated as equivalent to the “RCO - Energy for buildings” sector as defined in Worden et al. (2017) and Hoesly et  
1138 al. (2018) (Table S2). This is equivalent to the sum of the IPCC 1A4a Commercial-institutional, 1A4b Residential,  
1139 1A4c Agriculture-forestry-fishing and 1A5 Other-unspecified reporting categories. This definition is consistent with that  
1140 used in Saunio et al. (2016) and Kirschke et al. (2013). While this sector incorporates biofuel use, it also includes the use  
1141 of other combustible materials (e.g., coal or gas) for small-scale heat and electricity generation within residential and  
1142 commercial premises. Data provided by the GAINS inventory suggests that this approach may overestimate biofuels  
1143 emissions by between 5 and 50%. Further study into this category would be needed to better disentangle biofuels from fossil  
1144 combustibles.

1145 In our study, biofuel burning is estimated to contribute 11 [8-14] Tg CH<sub>4</sub> yr<sup>-1</sup> to the global CH<sub>4</sub> budget, about 3% of total  
1146 global anthropogenic CH<sub>4</sub> emissions for 2010-2019.

### 1147 3.1.6 Other anthropogenic sources (not explicitly included in this study)

1148 Other anthropogenic sources not included in this study are related to agriculture and land-use management. In particular,  
1149 increases in agricultural areas (such as global palm oil production) have led to the clearing of natural peat forests, reducing  
1150 natural peatland area and associated natural CH<sub>4</sub> emissions. Peatlands planted to forests (like in Northern Europe) also lead  
1151 to reduced CH<sub>4</sub> emissions. While studies have long suggested that CH<sub>4</sub> emissions from peatland drainage ditches are likely  
1152 to be significant (e.g., Minkinen and Laine, 2006, Peacock et al., 2021), CH<sub>4</sub> emissions related to palm oil plantations have  
1153 yet to be properly quantified (e.g., Manning et al. 2019). Taylor et al. (2014) have quantified global palm oil wastewater  
1154 treatment fluxes to be 4 ± 32 Tg CH<sub>4</sub> yr<sup>-1</sup> for 2010-2013. This currently represents a small and highly uncertain source of  
1155 methane but one potentially growing in the future.

Supprimé: 14-26

Supprimé: 2008-2017

Supprimé: methane

Supprimé: Biomass that is used

Supprimé: methane

Supprimé: biofuels

Supprimé: (André et al., 2014), and yet methane

Supprimé: (2017) and Hoesly et al. (2018) (See Table S2).

Supprimé: .

Supprimé:

Supprimé: 12

Supprimé: [10-14]

Supprimé: methane

Supprimé: methane

Supprimé: 2008-2017

Mis en forme : Police :Gras, Couleur de police : Noir

Mis en forme : Normal, Espace Avant : 12 pt, Après : 12 pt, Paragraphes solidaires, Bordure : Haut: (Pas de bordure), Bas: (Pas de bordure), Gauche: (Pas de bordure), Droite: (Pas de bordure), Entre : (Pas de bordure)

Mis en forme : Police :Gras, Couleur de police : Noir

Supprimé: In particular, increases in global palm oil production have led to the clearing of natural peat forests, reducing natural peatland area and associated natural CH<sub>4</sub> emissions. While studies have long suggested that CH<sub>4</sub> emissions from peatland drainage ditches are likely to be significant (e.g. Minkinen and Laine, 2006), CH<sub>4</sub> emissions related to palm oil plantations have yet to be properly quantified. Taylor et al. (2014) have quantified global palm oil wastewater treatment fluxes to be 4 ± 32 Tg CH<sub>4</sub> yr<sup>-1</sup> for 2010-2013.

1179 **3.2 Natural and indirect anthropogenic sources**

1180 As introduced in section 2.4, natural and indirect anthropogenic sources refer to pre-agricultural CH<sub>4</sub> emissions even if they

1181 are perturbed by anthropogenic climate change or other global change factors (e.g., eutrophication), and indirect emissions

1182 resulting from anthropogenic perturbation of the landscape (reservoirs) and the biogeochemical characteristics of soil. They

1183 include vegetated wetland emissions and inland freshwater systems (lakes, small ponds, reservoirs, and rivers), land

1184 geological sources (gas-oil seeps, mud volcanoes, microseepage, geothermal manifestations, and volcanoes), wild animals,

1185 wildfires, termites, thawing terrestrial and marine permafrost, and coastal and oceanic sources (biogenic, geological and

1186 hydrate). In water-saturated or flooded ecosystems, the decomposition of organic matter gradually depletes most of the

1187 oxygen in the soil or the sediment zone, resulting in anaerobic conditions and CH<sub>4</sub> production. Once produced, CH<sub>4</sub> can

1188 reach the atmosphere through a combination of three processes: (1) diffusive loss of dissolved CH<sub>4</sub> across the air-water

1189 boundary; (2) ebullition flux from sediments; and (3) flux mediated by emergent aquatic macrophytes and terrestrial plants

1190 (plant transport). On its way to the atmosphere, in the soil or water columns, CH<sub>4</sub> can be partly or completely oxidised by

1191 microorganisms, which use CH<sub>4</sub> as a source of energy and carbon (USEPA, 2010b). Concurrently, methane from the

1192 atmosphere can diffuse into the soil column and be oxidised (See Sect. 3.3.4 on soil uptake).

1193 **3.2.1 Wetlands**

1194 Wetlands are generally defined as ecosystems in which mineral or peat soils are water-saturated at some depth or where

1195 surface inundation (permanent or not) has a dominating influence on the soil biogeochemistry and determines the ecosystem

1196 species composition (USEPA, 2010b). To refine such an overly broad definition for CH<sub>4</sub> emissions, we define wetlands as

1197 ecosystems with inundated or saturated soils or peats where anaerobic conditions below the water table lead to CH<sub>4</sub>

1198 production (Matthews and Fung, 1987; USEPA, 2010b). Brackish water emissions are discussed separately in Sect. 3.2.6.

1199 Our definition of wetlands includes ombrotrophic and minerotrophic peatlands (i.e., bogs and fens), mineral soil wetlands

1200 (swamps and marshes), and seasonal or permanent floodplains. It excludes exposed water surfaces without emergent

1201 macrophytes, such as lakes, rivers, estuaries, ponds, and reservoirs (addressed in the next section), as well as rice agriculture

1202 (see Sect. 3.1.4, rice cultivation paragraph), and wastewater ponds. It also excludes coastal vegetated ecosystems

1203 (mangroves, seagrasses, salt marshes) with salinities usually >0.5 (See Sect. 3.2.6). Even with this definition, some wetlands

1204 could be considered as anthropogenic systems, being affected by human land-use changes such as impoundments, drainage,

1205 or restoration (Woodward et al., 2012). In the following, we retain the generic denomination “wetlands” for natural and

1206 human-influenced wetlands, as discussed in Sect. 2.2.

1207 The three most important factors influencing CH<sub>4</sub> production in wetlands are the spatial and temporal extent of anoxia

1208 (linked to water saturation), temperature, and substrate availability (Valentine et al., 1994; Wania et al., 2010; Whalen, 2005;

1209 Delwiche et al., 2021; Knox et al., 2021).

Mis en forme : Police :Gras, Couleur de police : Noir

Mis en forme : Normal, Espace Avant : 12 pt, Après : 12 pt, Paragraphes solidaires, Bordure : Haut: (Pas de bordure), Bas: (Pas de bordure), Gauche: (Pas de bordure), Droite: (Pas de bordure), Entre : (Pas de bordure)

Mis en forme : Police :Gras, Couleur de police : Noir

Supprimé: Natural methane

Supprimé: water

Supprimé: methane

Supprimé: methane

Supprimé: methane

Supprimé: oxidized

Supprimé: a group of bacteria called methanotrophs

Supprimé: methane

Supprimé: their only

Supprimé: (USEPA, 2010b).

Supprimé: oxidized

Mis en forme : Police :Gras, Couleur de police : Noir

Mis en forme : Normal, Retrait : Première ligne : 0 cm, Espace Avant : 12 pt, Après : 12 pt, Paragraphes solidaires, Bordure : Haut: (Pas de bordure), Bas: (Pas de bordure), Gauche: (Pas de bordure), Droite: (Pas de bordure), Entre : (Pas de bordure)

Supprimé: or peats

Supprimé:

Supprimé: dominates

Supprimé: (USEPA, 2010b). In order to

Supprimé: methane

Supprimé: methane

Supprimé: (Matthews and Fung, 1987; USEPA, 2010b).

Supprimé: psu

Supprimé: (Woodward et al., 2012).

Supprimé: 2.

Supprimé: The three most important factors influencing methane production in wetlands are the spatial and temporal extent of anoxia (linked to water saturation), temperature and substrate availability (Valentine et al., 1994; Wania et al., 2010; Whalen, 2005). Land-surface models estimate CH<sub>4</sub> emissions through a series of processes, including CH<sub>4</sub> production, oxidation and transport. The models are then forced with inputs accounting for changing environmental factors (Melton et al., 2013; Poulter et al., 2017; Tian et al., 2010; Wania et al., 2013; Xu et al., 2010). Methane emissions from wetlands are computed as the product of an emission flux density and a methane producing area or surface extent (see Supplementary Material; Bohn et al., 2015; Melton et al., 2013). Wetland extent appears to be a primary contributor to uncertainty in

Land surface models estimate CH<sub>4</sub> emissions through a series of processes, including CH<sub>4</sub> production, oxidation, and transport. The models are then forced with inputs accounting for changing environmental factors (Melton et al., 2013; Poulter et al., 2017; Tian et al., 2010; Wania et al., 2013; Xu et al., 2010). CH<sub>4</sub> emissions from wetlands are computed as the product of an emission flux density and a CH<sub>4</sub> producing area or surface extent (see Supplementary Material; Bohn et al., 2015; Melton et al., 2013). The areal extent of different wetland types (having large differences in areal CH<sub>4</sub> emission rates) appears to be a primary contributor to uncertainties in the absolute flux of CH<sub>4</sub> emissions from wetlands, with meteorological response being the main source of uncertainty for seasonal and interannual variability (Poulter et al., 2017; Kuhn et al., 2021; Parker et al., 2022; McNicol et al., 2023; Karlson and Bastviken 2023).

In this work, sixteen land surface models computing net CH<sub>4</sub> emissions (Table 2) were run under a common protocol with a spin-up using repeated climate data from 1901-1920 to pre-industrial conditions followed by a transient simulation through the end of 2020. Of the 16 models, 13 previously contributed to Saunio et al. (2020), and three models were new to this release (CH4MOD<sub>wetland</sub> (Li et al., 2010), ISAM (Shu et al., 2020; Xu et al., 2021), and SDGVM (Beerling and Woodward, 2001; Hopcroft et al., 2011; Hopcroft et al., 2020 )) (Table 2, see also in the Supplementary Material Table S3 for a history of the contributing models). Climatic forcing uncertainties are considered in the ensemble estimate by using two climate datasets, CRU/CRU-JRA55 (Harris, 2014) and GSWP3-W5E5 (Dirmeyer et al., 2006; Kim 2017; Lange, 2019; Cucchi et al., 2020). Atmospheric CO<sub>2</sub> was also prescribed in the models. For all models, two wetland area dynamic schemes were applied: a diagnostic scheme using a remote sensing-based wetland area and dynamics dataset called WAD2M (Wetland Area Dynamics for Methane Modeling; Zhang et al., 2021a; 2021b) available at 0.25 degree of horizontal resolution, as in Saunio et al. (2020), and a prognostic scheme using internal model-specific hydrologic models.

The diagnostic wetland extent product WAD2Mv1.0 (Zhang et al., 2021a) has been updated since Saunio et al. (2020) to WAD2Mv2.0 (Zhang et al., 2021b) and extended to 2020. It uses the same Surface Water Microwave Product Series (SWAMPSv3.2) for capturing inundation dynamics (Jenson and McDonald, 2019), which was extended to 2020. To reduce potential double-counting with the freshwater budget, the surface areas of rivers/streams and lakes/ponds are excluded by using the products Global River Widths from Landsat (GRWL) database v01.01 (Allen and Pavelsky, 2018) and HydroLakes v1.0 (Messenger et al., 2016), instead of the Global Surface Water (GSW) product (Pekel et al., 2016) used in WAD2Mv1.0. The GRWL and Hydrolakes are also the datasets used separately in the upscaling of the freshwater budget allowing for a more consistent approach between the wetland and freshwater CH<sub>4</sub> budgets (Sect. 3.2.2). This update in WAD2M leads to a downward revised annual average wetland extent by 0.5 Mkm<sup>2</sup> for the mid-high latitudes (mainly due to larger lake extent in HydroLakes than in the GSW dataset) with small impacts in other regions. However, since HydroLakes includes only vectorized lakes larger than 0.1 km<sup>2</sup>, smaller lakes/ponds under 0.1 km<sup>2</sup> are implicitly still included as wetlands in WAD2Mv2.0. For the high-latitude region, the recent peatland extent product from Hugelius et al. (2020) is applied, which indicates a slightly higher peatland area by 0.2 Mkm<sup>2</sup> primarily in regions above 60°N, compared to the Northern Circumpolar Soil Carbon Database (NCSCD) product (Hugelius et al., 2013) used in WAD2Mv1.0. Rice agriculture was

removed using the Monthly Irrigated and Rainfed Crop Areas (MIRCA2000, Portmann et al. (2010)) dataset from circa 2000, as a fixed distribution.

The combined remote-sensing and inventory WAD2Mv2.0 product leads to a maximum wetland area of 13.6 Mkm<sup>2</sup> during the peak season (7.9 Mkm<sup>2</sup> on annual average, with a range of 7.5 to 8.4 Mkm<sup>2</sup> from 2000-2020, about 5.2% of the global land surface). The largest wetland areas in WAD2Mv2.0 are in Amazonia, the Congo Basin, and the Western Siberian Lowlands, which in previous studies were underestimated by inventories (Bohn et al., 2015). However, the SWAMPS v3.2 dataset which serves as a proxy of temporal variations of wetland extent, has discontinuity issues over a few tropical hotspots since 2015 and hence affects the temporal variations of WAD2M. Consequently, this affects CH<sub>4</sub> emissions estimates for a subset of land surface models that are particularly sensitive to inundation in these hotspots. Meanwhile, prognostic estimates show moderate consistency in capturing the spatial distribution of wetland area with WAD2M, with an annual average wetland area of 8.0±2.0 Mkm<sup>2</sup> during the peak season for 2000-2020. The ensemble mean of annual wetland area anomaly by the prognostic models show reasonable agreement with satellite-based estimates in capturing the response of wetland area to climate variations (Zhang et al., in review), with higher agreement over temperate and boreal regions than in the tropics.

For the wetland methane emissions estimate, we use the decadal mean from the prognostic runs and adjust these flux estimates for double counting from inland waters (described in next section) given the reliance of the prognostic models on satellite flooded area data like WAD2Mv2 to parameterize maximum wetland extent (Zhang et al., in review). The average emission from wetlands for 2010-2019 for the 16 models is plotted in Fig. 3. The zones with the largest emissions are the Amazon basin, equatorial Africa and Asia, Canada, western Siberia, eastern India, and Bangladesh. Regions where CH<sub>4</sub> emissions have high inter-model agreement (defined as regions where mean flux is larger than the standard deviation of the models, on a decadal mean) represent 72% of the total CH<sub>4</sub> flux due to natural wetlands. The different sensitivities of the models to temperature, vapour pressure, precipitation, and radiation can generate substantially different patterns, such as in India. Emission estimates over regions with lower emissions (in total) are also consistently inferred between models, (e.g., Scandinavia, Continental Europe, Eastern Siberia, Central United States of America, and Southern Africa).

The resulting global flux range for vegetated wetland emissions from the prognostic runs is 117-195 Tg CH<sub>4</sub> yr<sup>-1</sup> for the 2000-2020 period, with an average of 157 Tg CH<sub>4</sub> yr<sup>-1</sup> and a one-sigma standard deviation of 24 Tg CH<sub>4</sub> yr<sup>-1</sup>. Using the prognostic set of simulations, the average ensemble emissions were 159 [119-203] Tg CH<sub>4</sub> yr<sup>-1</sup> for the 2010-2019 period (Table 3). The estimated average ensemble annual total from the two sets of simulations by CRU/CRU-JRA55 and GSWP3-W5E5 are 158 [126-193] and 158 [118-203] for 2010-2019, respectively. Generally, the magnitude and interannual variability agree between these two sets of simulations (Zhang et al., in review). Wetland emissions represent about 25% of the total (natural plus anthropogenic) CH<sub>4</sub> sources estimated by bottom-up approaches. The large range in the estimates of wetland CH<sub>4</sub> emissions results from difficulties in defining wetland CH<sub>4</sub> producing areas as well as in parameterizing terrestrial anaerobic conditions that drive sources and the oxidative conditions leading to sinks (Melton et al., 2013; Poulter

**Supprimé:** methane

**Supprimé:** are robustly inferred

**Supprimé:** 61

**Supprimé:** methane

**Supprimé:** This contribution is 80% lower than found in Saunio et al. (2016) probably due to the different ensemble of models gathered here and the more stringent exclusion of inland waters.

**Supprimé:** main primary emission zones are consistent between models, which is clearly favoured by the prescribed common wetland extent. However, the

**Supprimé:** Some secondary

**Supprimé:** magnitude) emission zones

**Supprimé:** :

**Supprimé:** USA

**Supprimé:** tropical

**Supprimé:** :

**Supprimé:** The resulting global flux range for natural wetland emissions is 101-179 Tg CH<sub>4</sub> yr<sup>-1</sup> for the 2000-2017 period, with an average of 148 Tg CH<sub>4</sub> yr<sup>-1</sup> and a one-sigma standard deviation of 25 Tg CH<sub>4</sub> yr<sup>-1</sup>. For the last decade, 2008-2017, the average ensemble emissions were 149 Tg CH<sub>4</sub> yr<sup>-1</sup> with a range of 102-182 (Table 3). Using a prognostic set of simulations, where models used their own internal approach to estimate wetland area and dynamics, the average ensemble emissions were 161 Tg CH<sub>4</sub> yr<sup>-1</sup> with a range of 125-218 for the 2008-2017 period. The greater range of uncertainty from prognostic area models is due to unconstrained wetland area, but generally the magnitude and interannual variability agree between diagnostic and prognostic area approaches. Wetland emissions represent about 20% of the total (natural plus anthropogenic) methane sources estimated by bottom-up approaches. The large range in the estimates of wetland CH<sub>4</sub> emissions results from difficulties in defining wetland CH<sub>4</sub> producing areas as well as in parameterizing terrestrial anaerobic conditions that drive sources and the oxidative conditions leading to sinks (Melton et al., 2013; Poulter et al., 2017; Wania et al., 2013). The ensemble mean emission using diagnostic wetland extent in the models is lower by ~35 Tg CH<sub>4</sub> yr<sup>-1</sup> than the one previously reported (see Table 3, for 2000-2009 with comparison to Saunio et al., 2016). This difference results from a reduction in double counting due to i) decreased wetland area in WAD2M, especially for high-latitude regions where inland waters, i.e., lakes, small ponds and lakes, were removed, and ii) to some extent, an improved removal of rice agriculture area using the MIRCA-2000 database.

For the last decade, 2008-2017, the average ensemble emissions were 149 Tg CH<sub>4</sub> yr<sup>-1</sup> with a range of 102-182.

### 3.2.2 Other inland water systems (lakes, ponds, reservoirs, streams, rivers)

This category includes methane emissions from freshwater systems (lakes, ponds, reservoirs, streams and rivers). To date, very few process-based models exist for these fluxes, relying on data driven approaches and extrapolations. Meta-data analyses are hampered for methane due to a mix of methodological approaches, which capture different components of emissions, and different scales in space and time, depending on method and time of deployment and data processing (Stanley et al., 2016). Altogether, this inconsistency in

et al., 2017; Wania et al., 2013). The ensemble mean emission using the same simulation setup (i.e., diagnostic wetland extent and CRU/CRU-JRA55) in the models is 163 [117-195] Tg CH<sub>4</sub> yr<sup>-1</sup>, higher by ~22 Tg CH<sub>4</sub> yr<sup>-1</sup> than the one previously reported (see Table 3, for 2000-2009 with comparison to Saunio et al., 2020). This difference is mainly due to the updated model structure and parameterizations in the wetland CH<sub>4</sub> models compared to the versions in the previous budget and the inclusion of three new land surface models. For the last decade 2010-2019, we report in this budget an average ensemble estimate of 159 Tg CH<sub>4</sub> yr<sup>-1</sup> with a range of 119-203 (based on prognostic wetland extent runs).

### 3.2.2 Inland freshwater systems (lakes, ponds, reservoirs, streams, rivers)

This category includes CH<sub>4</sub> emissions from freshwater systems (lakes, ponds, reservoirs, streams, and rivers). Numerous advances have been made in the freshwater greenhouse gases knowledge base in the last few years (Lauerwald et al., 2023a). These advances include improvements in the underlying databases used to estimate inland water surface areas and model their dynamics, a rapidly growing number of direct measurements of methane fluxes, and improvements in our process-based understanding of methane biogeochemistry. Despite this, aspects of global freshwater methane estimates remain rather crude and continue to have large uncertainties. This includes the overall temperature dependency of methane emissions, the relative role of ebullition (i.e., bubble flux, which may represent the most important, but most difficult-to-capture emission path in many standing water bodies), fluxes from the smallest standing water bodies (sometimes referred to as ponds) having large emissions per m<sup>2</sup> but uncertain area extent, and the magnitude of anthropogenic influence on emissions, all which are discussed below.

**Streams and rivers.** The last global CH<sub>4</sub> budget used an estimate of 27 Tg CH<sub>4</sub> yr<sup>-1</sup> for global streams and rivers based largely on a data compilation by Stanley et al. (2016). This estimate was scaled from a simple data compilation without a spatial component or an estimate of ebullition. More recently, Rosentreter et al. (2021) performed a new data compilation of 652 flux estimates, including diffusive and ebullitive fluxes, coupled to an ice corrected surface area estimate of ~625,000 km<sup>2</sup> that was aggregated to 5 latitudinal bands to come up with a global estimate of 6 and 31± 17 Tg CH<sub>4</sub> yr<sup>-1</sup> (respectively for the median and mean ± c.i. 95%). We believe, due to better data representation in underlying datasets, that the mean estimate of Rosentreter et al. (2021) is more representative statistically because the median does not capture hotspots and hot moments of intense ebullitive fluxes. Finally, Rocher-Ros et al. (2023) used a new Global River Methane (GRiMeDB) database (Stanley et al., 2023) with > 24,000 observations of CH<sub>4</sub> concentrations to predict ~28±17 Tg CH<sub>4</sub> yr<sup>-1</sup> (±c.i. 95%) river emissions globally. This approach used machine learning methods coupled to the latest spatially and temporally explicit mapping of monthly stream surface area (the smallest streams are still extrapolated) which incorporates drying and freezing effects (yearly average 672,000 km<sup>2</sup>, Liu et al., 2022) and includes an ebullitive flux estimated from a correlation between measured diffusive and ebullitive emissions in the GRiMeDB database (Stanley et al., 2023). Thus, for this study we use an



estimate of  $29 \pm 17$  ( $\pm$ c.i. 95%)  $\text{Tg CH}_4 \text{ yr}^{-1}$  for streams and rivers, which averages the mean estimate of Rosentreter et al. (2021) and Rocher-Ros et al. (2023). Currently, ebullitive fluxes remain a major unknown quantity in streams and rivers but appear to be coarsely linearly correlated in a log-space to diffusive fluxes and of similar magnitude (Rocher-Ros et al., 2023). Methodologically, the high-water velocity of many streams and rivers make measurement of ebullitive fluxes challenging (Robison et al., 2021). Effluxes are also linked to hydrology (Aho et al., 2021) although very few studies have sampled over a representative hydrograph. Plant-mediated effluxes of  $\text{CH}_4$  in running waters also remain difficult to constrain, with a recent compilation highlighting very few measurements (Bodmer et al. 2024). Connected adjacent wetlands is a common source of  $\text{CH}_4$  to streams and rivers (Borges et al., 2019) which may be important for the regulation of running water emissions but is currently difficult to assess at the global scale. Overall, the poor representation of sites and deficient mechanistic understanding make it difficult to model and predict methane evasion from streams and rivers using process-based models.

**Lakes and ponds.** The previous global  $\text{CH}_4$  budget used an estimate of  $71 \text{ Tg CH}_4 \text{ yr}^{-1}$  for lakes and  $18 \text{ Tg CH}_4 \text{ yr}^{-1}$  for reservoirs. These estimates were based on an early study by Bastviken et al. (2011) coupled with a newer estimate for lakes north of  $50^\circ\text{N}$  (Wik et al., 2016b). There have been three new lake studies that have published their data with global estimates of  $56$  and  $151 \pm 73$  (Rosentreter et al. (2021); ( $\pm$ c.i. 95%) : respectively for the median and mean  $\pm$  c.i. 95% ),  $22 \pm 8$  (Zhuang et al., 2023;  $\pm$ lake-area-weighted normalised RMSE for all parameterized lake types ), process-based model), and  $41 \pm 36$   $\text{Tg CH}_4 \text{ yr}^{-1}$  (Johnson et al., 2022, mean  $\pm$ c.i. 95%). This large range in estimated emissions can be attributed to the differences in the datasets and methods used to calculate the surface area of small waterbodies, as well as the differences between how the flux data were analyzed and extrapolated between studies. For instance, total surface areas of all lakes and ponds of  $3712\text{-}5688 \times 10^3 \text{ km}^2$  (Rosentreter et al., 2021) and  $2806 \times 10^3 \text{ km}^2$  (Johnson et al., 2022) were used along with measurement data from 198 and 575 individual lake systems, respectively. In contrast, Zhuang et al. (2023) generated estimates using higher temporal resolution data from just 54 lakes to build a process-based model, which generated much lower flux estimates from tropical lakes than previously implemented statistical approaches, but in line with the most recent assessments by Borges et al. (2022). For this study, we explicitly excluded lakes  $< 0.1 \text{ km}^2$  which are treated separately (see below). If we re-assess these three studies for only lakes greater than  $0.1 \text{ km}^2$ , we obtain global effluxes of  $17$  and  $42.9 \pm 20.8$   $\text{Tg CH}_4 \text{ yr}^{-1}$  (Rosentreter et al. (2021); median and mean ( $\pm 95\%$  C.I.) of global flux),  $21.9 \pm 8.0$ . (Zhuang et al., 2023,  $\pm$ lake-area-weighted normalised RMSE for all parameterized lake types), and  $35.3 \pm 31.0$   $\text{Tg CH}_4 \text{ yr}^{-1}$  (Johnson et al. 2022,  $\pm 95\%$  C.I.) (with areas of  $2556\text{-}3468 \times 10^3$ ,  $2640 \times 10^3$ , and  $2676 \times 10^3 \text{ km}^2$  respectively). Thus, for lakes  $> 0.1 \text{ km}^2$ , we propose an efflux of  $\sim 33 \pm 26$   $\text{Tg CH}_4 \text{ yr}^{-1}$  (an average of the mean from Rosentreter et al., 2021 Zhuang et al., 2023, and Johnson et al., 2022, with the average 95% C.I. from Rosentreter et al., 2021 and Johnson et al. 2022).

Small waterbody emissions, hereafter small lakes and ponds  $< 0.1 \text{ km}^2$ , remain difficult to assess. Evidence is emerging that there is a lower limit to the power scaling laws that early studies used to extrapolate the surface area of these small systems

1559 (Bastviken et al., 2023; Kyzivat et al., 2022). Thus, for small lakes and ponds < 0.1 km<sup>2</sup> (and >0.001 km<sup>2</sup>), we disregard the  
 1560 higher end surface area used in Rosentreter et al., 2021 which relied on these earlier estimates and scale their numbers to  
 1561 the evasion estimates to the lower end surface area of 1,002x10<sup>3</sup> to obtain a mean flux of 33 Tg CH<sub>4</sub> yr<sup>-1</sup> (Rosentreter et al.,  
 1562 2021). Johnson et al. (2022) estimated a surface area of only 166,000 km<sup>2</sup> for this size class to obtain an efflux of 6.3  
 1563 Tg CH<sub>4</sub> yr<sup>-1</sup>, which we acknowledge as a lower limit. Averaging these two values provide a conservative estimate of ~20  
 1564 [6-33] Tg CH<sub>4</sub> yr<sup>-1</sup>, which is close to the number proposed by Holgerson and Raymond (2016) for diffusion effluxes only  
 1565 for this size class. The experts involved in this assessment have low confidence in this estimate. This also does not include  
 1566 artificial ponds, which we discuss below. As a result, CH<sub>4</sub> emissions from both large lakes (>0.1 km<sup>2</sup>) and small lakes and  
 1567 ponds (<0.1km<sup>2</sup>) are estimated at 53 [19-86] Tg CH<sub>4</sub> yr<sup>-1</sup>, on average lower than the 71 Tg estimated in the previous budget.  
 1568  
 1569 **Reservoirs.** New mean estimates of diffusive + ebullitive CH<sub>4</sub> emissions from reservoirs include 15 and 24±8 (the median  
 1570 and mean±95% C.I. from Rosentreter et al., 2021), 10±4 (Johnson et al., 2021, mean±95% C.I.), 10 (Harrison et al., 2021,  
 1571 low and high 95% CI 7 and 22, respectively), and 2.1 Tg CH<sub>4</sub> yr<sup>-1</sup> (Zhuang et al., 2023). We compile the first three estimates  
 1572 to a direct efflux of ~14 Tg CH<sub>4</sub> yr<sup>-1</sup> (with ±95% C.I. of 9 and 23). We note the fourth estimate as a lower bound, but exclude  
 1573 it from this budget given that it was generated via a model that only included data from six reservoir systems (Zhuang et al.,  
 1574 2023). We also add in an additional 12 Tg CH<sub>4</sub> yr<sup>-1</sup> (95% C.I. 7 and 37) that is estimated to degas in dam turbines (Harrison  
 1575 et al., 2021), which was not addressed in the studies by Rosentreter et al. (2021), Zhuang et al. (2023), or Johnson et al.  
 1576 (2021). Rocher-Ros et al. (2023) also excluded river observations below dams when executing their statistical model, and  
 1577 so did not capture downstream dam emissions. Thus, we use a direct reservoir emission here of ~13 [6-28] Tg CH<sub>4</sub> yr<sup>-1</sup> and  
 1578 estimate an additional ~12 [7-37] Tg CH<sub>4</sub> yr<sup>-1</sup> from dam turbine degassing fluxes, giving a total of 25 [13-65] Tg CH<sub>4</sub> yr<sup>-1</sup>  
 1579 from reservoirs.  
 1580  
 1581 **Uncertainties and confidence levels.** The emission estimates of lakes, reservoirs and ponds described above are limited by  
 1582 several uncertainties. First, a major unknown for lakes remains the size cut off and the representation of small lakes and  
 1583 ponds (Deemer and Holgerson, 2021), which are also more variable than larger water bodies in their CH<sub>4</sub> concentrations  
 1584 and fluxes (Rosentreter et al. 2021, Ray et al., 2023). Interestingly, there is also a lack of methane data representation from  
 1585 large lakes that are a large component of global lake surface area (Deemer and Holgerson, 2021; Messenger et al., 2016).  
 1586 There is also a growing knowledge base on the importance of high CH<sub>4</sub> fluxes from lake littoral zones that is not yet well  
 1587 incorporated into global scaling efforts (e.g., Grinham et al., 2011; Natchimuthu et al., 2016), and emergent vegetation  
 1588 (Bastviken et al., 2023; Kyzivat et al., 2022). Ebullition is more constrained in lakes/reservoirs compared to streams/rivers  
 1589 but is still difficult to measure and model accurately. Finally, for all aquatic systems a greater scrutiny of the regulation  
 1590 (including the impact of ice-cover and seasonality) of different CH<sub>4</sub> emission pathways is needed.

2591 The majority of the inland water CH<sub>4</sub> estimates are from a limited number of studies, some without spatial representation or  
2592 reported statistical uncertainties. Furthermore, as mentioned above the knowledge base of the surface area of these  
2593 ecosystems is new and rapidly expanding, but not standardised between studies leading to uncertainty (but see Lauerwald  
2594 et al. 2023b), particularly for ponds. For this study, we are able to provide confidence intervals from the original studies for  
2595 all fluxes except the smallest lake/pond size class.

2596  
2597 **The Surface Area of Inland Freshwaters.** For all of these ecosystems, determining their surface area remains a central  
2598 challenge. Since the last GMB, several methodological advances have reduced the uncertainty associated with the surface  
2599 area estimates of rivers, streams, lakes, and reservoirs. Using a single geospatial dataset that includes both lakes and  
2600 reservoirs (Messenger et al., 2016) has decreased double counting of lakes and reservoirs (Johnson et al., 2022; Rosentreter  
2601 et al., 2021). For rivers and streams, high-resolution global streamflow simulations, informed by satellite observations,  
2602 enabled a much finer scale estimate of surface areas for rivers with a new temporal component (Allen and Pavelsky, 2018;  
2603 Lin et al., 2019; Liu et al., 2022), although the surface for the smaller streams are still estimated indirectly, and mapping of  
2604 human-created drainage ditches and canals is lacking. Seasonal ice cover and melt turnover corrections also have been newly  
2605 incorporated into rivers, streams, lakes, and reservoirs (Harrison et al., 2021; Johnson et al., 2022; Lauerwald et al., 2023b;  
2606 Rocher-Ros et al., 2023; Rosentreter et al., 2021; Zhuang et al., 2023). Finally, removing open water body surface areas  
2607 from wetland surface areas based on geographic location has reduced double counting between these two land cover types,  
2608 as described in the wetlands section of the GMB. Yet, the surface area of small lakes and ponds (<0.1 km<sup>2</sup>) is still highly  
2609 uncertain, and new techniques for counting these systems and determining the overlap with wetland data bases is paramount.

2610  
2611 **Anthropogenic Contributions to Inland Freshwater Emissions.** We argue that all reservoirs should be categorised as an  
2612 direct anthropogenic source of emissions. Most of the surface area of reservoirs are human-made and reservoir construction  
2613 leads to anoxic sediments and/or bottom waters with labile organic matter sourced from the watershed and to in-situ nutrient  
2614 augmented phytoplankton production (Deemer et al., 2016; Maavara et al., 2017; Prairie et al., 2018). It is also clear that the  
2615 cultural eutrophication of natural lakes is augmenting CH<sub>4</sub> emissions (DelSontro et al., 2018; Li et al., 2021), with shallow  
2616 lakes particularly likely to experience eutrophication (Qin et al., 2020). For instance, Beaulieu et al. (2019) modelled a 15%  
2617 reduction in lake CH<sub>4</sub> with a 25% reduction in lake phosphorus concentrations. Several recent studies have estimated that  
2618 anywhere between 30 and 50% of lakes are eutrophic (Cael et al., 2022; Qin et al., 2020; Sayers et al., 2015; Wu et al.,  
2619 2022). These studies estimate numerical percentages (one by depth class: Qin et al., 2020), but none have estimated the  
2620 percent of lake surface area that is eutrophic nor have any determined the extent of anthropogenic vs. natural eutrophication.  
2621 Still, numerous studies have noted widespread increases in eutrophication indicators across lakes due to nutrient loading  
2622 and warming (Griffiths et al., 2022; Ho et al., 2019; Taranu et al., 2015), thus we estimate that ⅓, or 11 Tg CH<sub>4</sub> yr<sup>-1</sup> of  
2623 CH<sub>4</sub> emissions from lakes >0.1 km<sup>2</sup> could be anthropogenic. Similarly, CH<sub>4</sub> emissions from small lakes and ponds are

1624 influenced by human factors, with emissions increasing with eutrophication (Deemer and Holgerson, 2021), erosion and  
 1625 runoff in agricultural landscapes (Heathcote et al., 2013), and warming, the latter likely to have a disproportionately greater  
 1626 effect in small, shallow systems (Woolway et al., 2016). Thus, we adopt the same  $\frac{1}{3}$  number as for lakes for the proportion  
 1627 of anthropogenic emissions in small lakes and ponds ( $<0.1 \text{ km}^2$ ), which amounts to  $6 \text{ Tg CH}_4 \text{ yr}^{-1}$ .  
 1628 There are also human-made small lakes and ponds, notably for agriculture, aquaculture, and recreation, that generally have  
 1629 conditions favourable for high  $\text{CH}_4$  emissions (Downing, 2010; Holgerson and Raymond, 2016; Malerba et al., 2022;  
 1630 Ollivier et al., 2019; Zhao et al., 2021; Dong et al., 2023). Downing (2010) estimated that farm ponds comprise a global  
 1631 surface area of  $\sim 77,000 \text{ km}^2$ ; using a conservative emission rate of  $265 \text{ mg CH}_4 \text{ m}^{-2} \text{ d}^{-1}$  and an ice correction factor of 0.6  
 1632 leads to an emission of  $4.5 \text{ Tg yr}^{-1}$  that is anthropogenically sourced from farm ponds. Here the value is rounded to  $5 \text{ Tg yr}^{-1}$ .  
 1633 Clearly, more work is required to assess the anthropogenic component of  $\text{CH}_4$  emissions from lakes and ponds.  
 1634 It remains difficult to parse out an anthropogenic component to stream and river  $\text{CH}_4$  fluxes. Although some studies have  
 1635 noticed a temperature dependence with stream sediments (Comer-Warner et al., 2018; Zhu et al., 2020), Rocher-Ros et al.  
 1636 (2023) noted a small temperature dependence of  $\text{CH}_4$  emissions in streams and rivers compared to other freshwater  
 1637 ecosystems, potentially due to the many other external processes affecting fluxes in these dynamic flowing ecosystems.  
 1638 Urbanisation can lead to elevated river  $\text{CH}_4$  emissions, particularly in regions with elevated organic matter and nutrient  
 1639 loading due to limited wastewater treatment (Begum et al., 2021; Nirmal Rajkumar et al., 2008; Wang et al., 2021a). Some  
 1640 studies have found agricultural streams and ditches can have higher effluxes due to inputs of fine sediments (Comer-Warner  
 1641 et al., 2018; Crawford and Stanley, 2016), organic carbon, and nutrients (Borges et al., 2018) that lead to in-situ methane  
 1642 production. Furthermore, the creation of drainage ditches in organic soils tap  $\text{CH}_4$  rich waters from water-logged horizons  
 1643 and heighten emissions from ex-situ sources (Peacock et al., 2021), although limitations in both the geographic scope of  
 1644 existing ditch emission estimates our ability to estimate global surface area of ditches precludes their inclusion in this budget.  
 1645 Finally, extremely high rates of  $\text{CH}_4$  emission have been linked to ongoing permafrost thaw in Asia's Qinghai-Tibet Plateau  
 1646 (Zhang et al., 2020). However, the loss and disconnection of wetlands to rivers may have resulted in a decrease in the input  
 1647 of dissolved  $\text{CH}_4$  from this source. A recent expert elicitation (Rosentreter, et al. submitted) reported that 35% of all inland  
 1648 freshwater sources were anthropogenic and given that some of the river flux is from upstream reservoirs, we assign a 30%  
 1649 anthropogenic contribution to the stream and river flux ( $9 \text{ Tg CH}_4 \text{ yr}^{-1}$ ), which approximates the expert elicitation via the  
 1650 impact of eutrophication and urban influences.  
 1651  
 1652 **Combination (lakes, ponds, reservoirs, streams and rivers, farm ponds).** Combining the aforementioned emissions from  
 1653 lakes  $>0.1 \text{ km}^2$  ( $\sim 33$  [13-53]  $\text{Tg CH}_4 \text{ yr}^{-1}$ ), small lakes and ponds  $< 0.1 \text{ km}^2$  (20 [6-33]  $\text{Tg CH}_4 \text{ yr}^{-1}$ ), reservoirs (25 [13-65]  
 1654  $\text{Tg CH}_4 \text{ yr}^{-1}$ ), streams and rivers (29 [12-46]  $\text{Tg CH}_4 \text{ yr}^{-1}$ ) and farm ponds (5  $\text{Tg CH}_4 \text{ yr}^{-1}$ ), leads to a total of  $\sim 112 \text{ Tg CH}_4$   
 1655  $\text{yr}^{-1}$  from freshwater systems, with a range of [49-202]  $\text{Tg CH}_4 \text{ yr}^{-1}$ . This estimate is about 50  $\text{Tg}$  lower than in Sauniois et  
 1656 al. (2020) and is broadly consistent with the recent regionalized estimate by Lauerwald et al. (2023b) compiled for the

1657 Regional Carbon Cycle Assessment and Processes (RECCAP2, <https://www.globalcarbonproject.org/reccap/>; 103 Tg CH<sub>4</sub>  
1658 yr<sup>-1</sup>, IQR= 82.1–134.8). The updated budget from these ecosystems and their anthropogenic components are represented on  
1659 Fig 4. The gridded products for emissions from lakes and ponds by Johnson et al. (2022), from reservoirs by Johnson et al.  
1660 (2021) and from streams and rivers by Rocher-Ros et al. (2023) have been combined into a single map presented in Fig. 5.  
1661  
1662 **Double-counting aquatic systems in the bottom-up estimates.** To address the differences found between bottom-up and  
1663 top-down CH<sub>4</sub> budgets, and to acknowledge advances in addressing the central issue of double counting CH<sub>4</sub> emissions for  
1664 inland ecosystems, we introduce here a new correction term. Historically, the bottom-up estimate of global CH<sub>4</sub> emissions  
1665 has been higher than the top-down estimate, first recognized in Kirschke et al. (2013) and confirmed in Saunio et al. (2016,  
1666 2020). The larger bottom-up emissions estimate has been partly attributed to double-counting vegetated wetland emissions  
1667 with inland freshwater emissions (including lakes, ponds, rivers, streams, and reservoirs) and also the emissions of CH<sub>4</sub>  
1668 produced in vegetated wetlands and then transported via aquatic processes and emitted from inland freshwaters (Pangala et  
1669 al., 2017; Kirk and Cohen, 2023). The Saunio et al. (2020) CH<sub>4</sub> budget addressed the issue of double counting through the  
1670 use of a revised vegetated wetland area dataset, WAD2M v1.0 (Zhang et al., 2021), that removed inland waters from the  
1671 SWAMPS (Jenson and McDonald, 2019) surface-inundation dataset, allowing for independent vegetated wetlands and  
1672 inland freshwater CH<sub>4</sub> emissions to be compiled. Yet, the Saunio et al. (2020) CH<sub>4</sub> budget still had a ~150 Tg CH<sub>4</sub> yr<sup>-1</sup>  
1673 difference between bottom-up and top-down estimates. In this budget, we refined the vegetated wetland area dataset with  
1674 WAD2M v2.0 (see section 3.2.1, where HydroLakes is used to remove lakes and ponds >0.1 km<sup>2</sup>). Additionally, we applied  
1675 numbers from peer-reviewed publications and expert elicitation to account for lateral CH<sub>4</sub> flux emissions. This most recent  
1676 BU budget estimates 159 [119–203] Tg CH<sub>4</sub> yr<sup>-1</sup> from vegetated wetlands for 2010–2019 and 112 Tg CH<sub>4</sub> yr<sup>-1</sup> from inland  
1677 freshwaters that includes 83 Tg CH<sub>4</sub> yr<sup>-1</sup> from lakes, ponds, and reservoirs and 29 Tg CH<sub>4</sub> yr<sup>-1</sup> from rivers and streams,  
1678 leading to a combined wetland and inland freshwater flux of 271 Tg CH<sub>4</sub> yr<sup>-1</sup>. Here, we propose a correction of 20 Tg CH<sub>4</sub>  
1679 yr<sup>-1</sup> to account for double counting of small lakes and ponds (< 0.1 km<sup>2</sup>) that are likely included in our vegetated wetlands  
1680 estimate, and removing 1–3 Tg CH<sub>4</sub> yr<sup>-1</sup> from river emissions due to lateral transport of CH<sub>4</sub> originating in adjacent vegetated  
1681 wetlands. The river flux correction arises from assuming that for catchments with >10% wetlands, rivers provide 5–10% of  
1682 vegetated CH<sub>4</sub> emissions. The total double-counting correction term of 23 Tg CH<sub>4</sub> reduces the BU budget for combined  
1683 wetlands and inland waters from 271 Tg CH<sub>4</sub> yr<sup>-1</sup> to 248 Tg CH<sub>4</sub> yr<sup>-1</sup> (see Fig. 4 and Table 3). Comparing the 2000–2009  
1684 decadal emissions from wetlands and inland freshwater ecosystems across the last three previous assessments of the budget  
1685 shows a significant downward revision with 305 (183+122) Tg CH<sub>4</sub> yr<sup>-1</sup>, 356 (147+209) Tg CH<sub>4</sub> yr<sup>-1</sup> and 248 (159+112–23)  
1686 Tg CH<sub>4</sub> yr<sup>-1</sup> (respectively from Saunio et al. (2016; 2020) and this work).  
1687 Finally, it is worth noting that inland freshwater ecosystems can overlap with geological seepage systems in some areas,  
1688 i.e., they may occur in correspondence with geological structures that emit fossil (microbial, thermogenic, or abiotic)  
1689 CH<sub>4</sub> generated in the Earth’s crust. Examples have been documented in the Fisherman Lake in Canada (Smith et al., 2005).

in the Baikal lake (Schmid et al., 2007), and in rice paddies in Japan (Etiope et al., 2011). Thus, some gas emissions in freshwater environments, particularly as bubble plumes, can be incorrectly attributed to modern biological (ecosystem) activities if appropriate isotopic and molecular analyses are not performed.

### 3.2.3 Onshore and offshore geological sources

Significant amounts of  $\text{CH}_4$  produced within the Earth's crust, naturally migrate to the atmosphere through tectonic faults and fractured rocks. Major emissions are related to hydrocarbon formation in sedimentary basins (microbial and thermogenic methane), through continuous or episodic exhalations from onshore and shallow marine hydrocarbon seeps and through diffuse soil microseepage (Etiope, 2015). Specifically, five source categories have been considered. Four are onshore sources: gas-oil seeps, mud volcanoes, diffuse microseepage, and geothermal manifestations including volcanoes. One source is offshore: submarine seepage, which may include the same types of gas manifestations occurring on land. Etiope et al. (2019) have produced the first gridded maps of geological  $\text{CH}_4$  emissions and their isotopic signature for these five categories, with a global total of  $37.4 \text{ Tg CH}_4 \text{ yr}^{-1}$  (reproduced in Fig. 5). However, these maps are based on incomplete data on geological sites due to missing information and difficulties in defining all current geological emitting sites. Combining the best estimates for the five categories of geological sources (from grid maps or from previous statistical and process-based models), the breakdown by category reveals that onshore microseepage dominate ( $24 \text{ Tg CH}_4 \text{ yr}^{-1}$ ), the other categories having similar smaller contributions: as mean values,  $4.7 \text{ Tg CH}_4 \text{ yr}^{-1}$  for geothermal manifestations, about  $7 \text{ Tg CH}_4 \text{ yr}^{-1}$  for submarine seepage and  $9.6 \text{ Tg CH}_4 \text{ yr}^{-1}$  for onshore seeps and mud volcanoes. These values lead to a global bottom-up geological emission mean of  $45 [27-63] \text{ Tg CH}_4 \text{ yr}^{-1}$  (Etiope and Schwietzke, 2019). While all bottom-up and some top-down estimates, following different and independent techniques from different authors, consistently suggest a global geo- $\text{CH}_4$  emission in the order of  $40-50 \text{ Tg yr}^{-1}$ , the radiocarbon ( $^{14}\text{C}-\text{CH}_4$ ) data in ice cores reported by Hmiel et al. (2020) appear to give a much lower estimate, with a minimum of about  $1.6 \text{ Tg CH}_4 \text{ yr}^{-1}$  and a maximum value of  $5.4 \text{ Tg CH}_4 \text{ yr}^{-1}$  (95 percent confidence) for the pre-industrial period. The discrepancy between Hmiel et al. (2020) and all other estimates has been discussed in Thornton et al. (2021), which demonstrated that the global near-zero geologic  $\text{CH}_4$  emission estimate in Hmiel et al. (2020) is incompatible with the sum of multiple independent bottom-up estimates, based on a wide variety of methodologies, from individual natural geological seepage areas: for example, from the Black Sea (up to  $1 \text{ Tg CH}_4 \text{ yr}^{-1}$ ), the Eastern Siberian Arctic Shelf (ESAS, up to  $4.6 \text{ Tg CH}_4 \text{ yr}^{-1}$ , referring mostly to thermogenic gas), onshore Alaska (up to  $1.4 \text{ Tg CH}_4 \text{ yr}^{-1}$ ) and a single seepage site in Indonesia (releasing  $0.1 \text{ Tg CH}_4 \text{ yr}^{-1}$  as estimated by satellite measurement) (see Thornton et al. (2021) and references therein). Jackson et al. (2020) expressed doubt about the low Hmiel et al. (2020) estimates, noting that they are difficult to reconcile with the results of many other researchers and with bottom-up approaches in general. This discrepancy highlights another main unresolved uncertainty in the methane budget. Waiting for further investigation to better understand discrepancies between radiocarbon approaches and other studies, we decided to keep the estimates from Etiope and Shwietzke (2019) for the mean values, and associate it

**Mis en forme :** Police :Gras, Couleur de police : Noir

**Mis en forme :** Normal, Espace Avant : 12 pt, Après : 12 pt, Paragraphes solidaires, Bordure : Haut: (Pas de bordure), Bas: (Pas de bordure), Gauche: (Pas de bordure), Droite: (Pas de bordure), Entre : (Pas de bordure)

**Mis en forme :** Police :Gras, Couleur de police : Noir

**Supprimé :** methane

**Supprimé :** production

**Supprimé :** (Etiope, 2015). Specifically, five source categories have been considered.

**Supprimé :** (2019) have produced the first gridded maps of geological methane

**Supprimé :** 4). According to them, the grid maps do not represent, however, the actual global geological- $\text{CH}_4$  emission because the datasets used for the spatial gridding (developed for modelling purposes) were not complete or did not contain the information necessary for improving all previous estimates.

**Supprimé :** average

**Supprimé :** These values lead to a global bottom-up geological emission mean of  $45 [27-63] \text{ Tg CH}_4 \text{ yr}^{-1}$  (Etiope and Schwietzke, 2019).

**Supprimé :** While all bottom-up and some top-down estimates, following different and independent techniques from different authors, consistently suggest a global geo- $\text{CH}_4$  emission in the order of  $40-50 \text{ Tg yr}^{-1}$ , the radiocarbon ( $^{14}\text{C}-\text{CH}_4$ ) data in ice cores reported by Hmiel et al. (2020) appear to lower the estimate, with a minimum of about  $1.6 \text{ Tg CH}_4 \text{ yr}^{-1}$  and a maximum estimated value of  $5.4 \text{ Tg CH}_4 \text{ yr}^{-1}$  (95 percent confidence) for the pre-industrial period. The discrepancy between Hmiel et al. (2020) and all other estimates continue to feed the debate. Eastern Siberian Arctic Shelf (ESAS) emissions have been estimated at  $\sim 3 \text{ Tg CH}_4 \text{ yr}^{-1}$  based on current atmospheric surface observations (Thornton et al., 2020), corresponding to the same order of magnitude of the estimate from Hmiel et al. (2020) for global geological emissions. However, ESAS emissions are likely from both thermogenic and biogenic origins (e.g. Berchet et al., 2019). More investigation and confrontation between top-down and bottom-up results are needed to reduce this discrepancy.

Waiting for further investigation on this topic, we decided to keep the best estimates from Etiope and Shwietzke (2019) for the mean values, and associate it to the lowest estimates reported in Etiope et al. (2019). Thus, we report a total global geological emission of  $45 [18-63] \text{ Tg CH}_4 \text{ yr}^{-1}$ , with a breakdown between offshore emissions of  $7 [5-10] \text{ Tg CH}_4 \text{ yr}^{-1}$  and onshore emissions of  $38 [13-53] \text{ Tg CH}_4 \text{ yr}^{-1}$ . The updated bottom-up estimate is slightly lower than the previous budget mostly due to a reduction of estimated emissions of onshore and offshore seeps (see Sect. 3.2.6 for more offshore contribution explanations).

### 3.2.4 Termites

Termites are an infraorder of insects (isoptera), which occur predominantly in the tropical and subtropical latitudes (Abe et al., 2000).  $\text{CH}_4$  is released during the anaerobic decomposition of plant biomass in their gut (Sanderson, 1996). The uncertainty related to this  $\text{CH}_4$  source is very high as  $\text{CH}_4$  emissions from termites in different ecosystem types can vary and are driven by a range of factors, which



to the lowest estimates reported in Etiope et al. (2019), as in Sauniois et al. (2020). Thus, we report a total global geological emission of 45 [18-63] Tg CH<sub>4</sub> yr<sup>-1</sup>, with a breakdown between offshore emissions of 7 [5-10] Tg CH<sub>4</sub> yr<sup>-1</sup> and onshore emissions of 38 [13-53] Tg CH<sub>4</sub> yr<sup>-1</sup>, similar to Sauniois et al. (2020). This bottom-up estimate is slightly lower than in the Sauniois et al. (2016) budget mostly due to a reduction of estimated emissions of onshore and offshore seeps (see Sect. 3.2.6 for more offshore contribution explanations).

#### 3.2.4 Termites

Termites are decomposers playing a central role in ecosystem nutrient fluxes at tropical and subtropical latitudes, in particular (Abe et al., 2000). Termites represent a natural CH<sub>4</sub> source due to methanogenesis occurring in their hindgut during the symbiotic metabolic breakdown of lignocellulose (Sanderson, 1996; Brune, 2014). The upscaling of CH<sub>4</sub> emissions from termites from site to global level is characterised by high uncertainty (Sanderson, 1996; Kirschke et al., 2013; Sauniois et al., 2016) due to the combination of factors that need to be considered and the scarcity of information for each of these factors for global upscaling. Needed data include termite biomass density (Sanderson, 1996), species distribution within and among ecosystems (Sugimoto et al., 1998), variation of termite CH<sub>4</sub> emission rates per species and dietary group (Sanderson, 1996), the role played by the termite mound structure in affecting the fraction of produced CH<sub>4</sub> that is effectively released into the atmosphere (Sugimoto et al., 1998; Nauer et al., 2018). In Kirschke et al. (2013) and Sauniois et al. (2016) a global upscaling of termite CH<sub>4</sub> emissions was proposed, where CH<sub>4</sub> emissions, E<sub>CH<sub>4</sub></sub> (kg CH<sub>4</sub> ha<sup>-1</sup>yr<sup>-1</sup>), were estimated as the product of three terms: termite biomass (Bi<sub>TERM</sub> g fresh weight m<sup>-2</sup>), a scalar correction factor (LU) expressing the effect of land use/cover change on termite biomass density, a termite CH<sub>4</sub> emission factor (EF<sub>TERM</sub>, μg CH<sub>4</sub> g<sup>-1</sup> Bi<sub>TERM</sub> h<sup>-1</sup>). The approach between the two re-analyses of CH<sub>4</sub> emissions varied only for the data sources of gross primary productivity (GPP) and land use which were used to attribute biomass values of termite per ecosystem surface unit, in order to cover different time spans, 1980s, 1990s and 2000s in Kirschke et al. (2013) and 2000-2007 and 2010-2016 in Sauniois et al. (2016). For the present update, additional changes have been introduced compared with the previous versions. Here we summarise the key data used for the new upscaling. CH<sub>4</sub> fluxes were modelled between 45°S and 45°N and within 35°S and 35°N. The termite biomass density, Bi<sub>TERM</sub> for tropical ecosystems was estimated as function (Kirschke et al., 2013; Bi<sub>TERM</sub>=1.21·e<sup>0.0008 GPP</sup>) of the gross primary production (GPP, g C m<sup>-2</sup> yr<sup>-1</sup>) using the 0.25° native resolution VODCA2GPP dataset covering the period 2001-2020 (Wild et al., 2022). Wetlands, barren areas, water bodies and artificial surfaces were excluded from this estimation and set as no data (no emissions). The scalar correction factor LU of 0.4 (60%) for agricultural areas (i.e., croplands) (Kirschke et al., 2013) was applied to the GPP value of the nearest natural areas to account for anthropic disturbance. The annual (2001-2020) land cover information was obtained from the MODIS Terra+Aqua Combined Land Cover product (MCD12C1v006; <https://lpdaac.usgs.gov/products/mcd12c1v006/>), using the International Geosphere-Biosphere Programme (IGP) classification with a 0.05° spatial resolution. For desert and arid lands, within 35°S and 35°N, a fixed Bi<sub>TERM</sub> value of 1.56 g m<sup>-2</sup> was instead used (Sanderson, 1996; Heděnc et al., 2022).

1875 Similarly, fix values from the few available studies reported in literature were used to estimate  $Bio_{TERM}$  between 35°- 45° N  
 1876 and 35°- 45° S as follows: 1.83 g m<sup>-2</sup> for temperate forests and grasslands (Wood and Sands, 1978; Petersen and Luxton,  
 1877 1982; Sanderson, 1996; Bignell and Eggleton, 2000; King et al., 2013; conversion factor from dry to fresh biomass is 0.27  
 1878 from Petersen and Luxton, 1982), 5.3 g m<sup>-2</sup> for scrublands and Mediterranean areas of Australia (Sanderson, 1996), 1.09 g  
 1879 m<sup>-2</sup> for the other Mediterranean shrubland ecosystems (Heděnc et al., 2022). Other climates and land covers were set as no  
 1880 data. Climate zoning was defined using the Climate Zones Köppen-Geiger dataset (Beck et al., 2018), this product is  
 1881 representative for the 1980-2016 time period and has a 0.0083° native resolution. The  $EF_{TERM}$  was revised compared with  
 1882 previous estimates (Kirschke et al., 2013; Saunois et al., 2016), in order to consider the different distribution of termite  
 1883 families and subfamilies in the different continents and ecosystems, characterised by different feeding habits and nest  
 1884 typologies, as reported by Sugimoto et al. (1998), which might influence the EF. The species of each family and subfamily  
 1885 of the two major groups of lower and higher termites, listed by Sugimoto et al. (1998) were associated with EF values based  
 1886 on emissions from in-vitro experiments as reported by Sanderson (1996) and Eggleton et al. (1999), to which a correction  
 1887 factor ( $cf_{MOUND}$ ) of 0.5 (Nauer et al., 2018) was applied in order to take into account the mound effect on the CH<sub>4</sub> produced  
 1888 by termites, once inside the nest. The average  $EF_{TERM}$  for tropical and temperate areas was hence estimated as the weighted  
 1889  $EF_{TERM}$  derived from the product of the percentage weight of each family or subfamily of termites in the “community  
 1890 composition” in each geographical area and ecosystem (Sugimoto et al. (1998, Table 6), the respective calculated EF of  
 1891 each family or subfamily, a scalar or correction factor which considers the nest type (as in Table 5 from Sugimoto et al.  
 1892 1998). For desert and arid lands and temperate areas, which were not reported in Sugimoto et al. (1998), EF rates were  
 1893 calculated directly from data reported in literature for the most representative species which were the genus *Amitermes* for  
 1894 the former (EF from data by Sanderson 1996, Eggleton et al. 1999, Jamali et al. 2011) and the genus *Reticulitermes* (family  
 1895 Rhinotermitidea) for the latter (EF from data by Odelson and Breznak, 1983; Sanderson, 1996; Eggleton et al., 1999; Myer  
 1896 et al., 2021). The following  $EF_{TERMS}$  were hence obtained to scale up emissions:  $3.26 \pm 1.79 \mu\text{g CH}_4 \text{ g}^{-1} \text{ termite h}^{-1}$  ( $28.56$   
 1897  $\text{mg CH}_4 \text{ g}^{-1} \text{ termite year}^{-1}$ ) for tropical ecosystems,  $1.82 \pm 1.54 \mu\text{g CH}_4 \text{ g}^{-1} \text{ termite h}^{-1}$  for temperate forests, grasslands, and  
 1898 Mediterranean areas,  $1.24 \pm 1.22 \mu\text{g CH}_4 \text{ g}^{-1} \text{ termite h}^{-1}$  for deserts and arid lands (warm climate). Annual CH<sub>4</sub> fluxes were  
 1899 computed for all the years from 2001 to 2020 producing 20 global maps at 0.05° resolution of yearly total emissions. A  
 1900 further map of the estimated error representative of the entire time period was elaborated at the same resolution as the  
 1901 emissions dataset.

1902 Termite CH<sub>4</sub> emissions over the period 2001-2020 varied between 9.7-10.8 Tg CH<sub>4</sub> yr<sup>-1</sup>, with an average of  $10.2 \pm 6.2 \text{ Tg}$   
 1903  $\text{CH}_4 \text{ yr}^{-1}$ . Considering a 20-year average, tropical and subtropical moist broadleaf forests contributed to 46% of the total  
 1904 average flux, while tropical and subtropical grasslands, savannas, and shrublands to another 36%. In terms of regional  
 1905 contribution, 37.2% of fluxes were attributed to South America, 31.5% to Africa, 18.1% to Asia, 5.5% to Australia, 7.4%  
 1906 to North America and less than 1% to Europe. The present estimate value is within the range of previous up-scaling studies.

spanning from 2 to 22 Tg CH<sub>4</sub> yr<sup>-1</sup> (Ciais et al., 2013). In this study, we report a decadal value of 10 Tg CH<sub>4</sub> yr<sup>-1</sup> with a range of [4-16].

### 3.2.5 Wild animals

Wild ruminants emit CH<sub>4</sub> through microbial fermentation that occurs in their rumen, similarly to domesticated livestock species (USEPA, 2010b). Using a total animal population of 100-500 million, Crutzen et al. (1986) estimated the global emissions of CH<sub>4</sub> from wild ruminants to be in the range of 2-6 Tg CH<sub>4</sub> yr<sup>-1</sup>. More recently, Pérez-Barbería (2017) lowered this estimate to 1.1-2.7 Tg CH<sub>4</sub> yr<sup>-1</sup> using a total animal population estimate of 214 million (range of 210-219), arguing that the maximum number of animals (500 million) used in Crutzen et al. (1986) was poorly justified. Moreover Pérez-Barbería (2017) also stated that the value of 15 Tg CH<sub>4</sub> yr<sup>-1</sup> found in the last IPCC reports is much higher than their estimate because this value comes from an extrapolation of Crutzen's work for the last glacial maximum when the population of wild animals was much larger, as originally proposed by Chappellaz et al. (1993). Recently, based on the modelling of grassland extent, Kleinen et al. (2023) also suggest that the population of wild animal during the last glacial maximum proposed by Crutzen et al. (1986) and further used by Chappellaz et al. (1993) were overestimated.

Based on these findings, the range adopted in this updated CH<sub>4</sub> budget is 2 [1-3] Tg CH<sub>4</sub> yr<sup>-1</sup> (Table 3).

### 3.2.6 Coastal and ocean sources

Coastal and oceanic sources comprise CH<sub>4</sub> release from estuaries, coastal vegetated habitats, as well as marine waters including seas and oceans. Possible sources of coastal and oceanic CH<sub>4</sub> include: (1) in-situ biogenic production through various pathways in oxygenated sea-surface waters (Oremland, 1979; Karl et al., 2008; Lenhart et al., 2016; Repeta et al., 2016), a flux that can be enhanced in the coastal ocean because of submarine groundwater discharge (USEPA, 2010b); (2) production from shallow and marine (bare and vegetated) sediments including free gas or destabilised hydrates and thawing subsea permafrost containing modern (<sup>14</sup>C-bearing) microbial gas; (3) geological marine seepage (see also Sect. 3.2.3), including hydrates, containing fossil (<sup>14</sup>C-free) microbial or thermogenic CH<sub>4</sub>. CH<sub>4</sub> produced in marine sediments and seabed CH<sub>4</sub> seepage can be transported across the water column to the sea-surface by upwelling waters (once at the surface methane can cross the sea-air interface via diffusion) and gas bubble plumes (for instance from geological marine seeps; e.g., Judd, 2004; Etiope et al., 2019). Gas bubble plumes can generally (but not exclusively, as described below) reach the atmosphere in relatively shallow waters (<400 m) of continental shelves and coastal zones. In coastal vegetated habitats CH<sub>4</sub> can also be transported to the atmosphere through the aerenchyma of emergent aquatic plants (Purvaia et al., 2004). We distinguish between coastal and oceanic "geological" and "modern biogenic" CH<sub>4</sub> sources. Coastal and oceanic "geological" emissions refer to CH<sub>4</sub> seepage from the Earth's crust (mostly in hydrocarbon-rich sedimentary basins), which is typically evaluated by combining geochemical analyses (isotopic and molecular, including radiocarbon, <sup>14</sup>C, analyses) and geological observations (degassing along faults, seeps, mud volcanoes). Geological emissions do not contain modern

Mis en forme : Police :Gras, Couleur de police : Noir

Mis en forme : Normal, Espace Avant : 12 pt, Après : 12 pt, Paragraphes solidaires, Bordure : Haut: (Pas de bordure), Bas: (Pas de bordure), Gauche: (Pas de bordure), Droite: (Pas de bordure), Entre : (Pas de bordure)

Mis en forme : Police :Gras, Couleur de police : Noir

Supprimé: Wild ruminants emit methane through the microbial fermentation process occurring in their rumen, similarly to domesticated livestock species (USEPA, 2010b). Using a total animal population of 100-500 million, Crutzen et al. (1986) estimated the global emissions of CH<sub>4</sub> from wild ruminants to be in the range of 2-6 Tg CH<sub>4</sub> yr<sup>-1</sup>. More recently, Pérez-Barbería (2017) lowered this estimate to 1.1-2.7 Tg CH<sub>4</sub> yr<sup>-1</sup> using a total animal population estimate of 214 million (range of 210-219), arguing that the maximum number of animals (500 million) used in Crutzen et al. (1986) was poorly justified. Moreover Pérez-Barbería (2017) also stated that the value of 15 Tg CH<sub>4</sub> yr<sup>-1</sup> found in the last IPCC reports is much higher than their estimate because this value comes from an extrapolation of Crutzen's work for the last glacial maximum when the population of wild animals was much larger, as originally proposed by Chappellaz et al. (1993).

Supprimé: methane

Supprimé: Oceanic

Mis en forme : Police :Gras, Couleur de police : Noir

Mis en forme : Police :Gras, Couleur de police : Noir

Mis en forme : Police :Gras, Couleur de police : Noir

Mis en forme ... [95]

Supprimé: Oceanic

Supprimé: coastal ocean and open ocean methane

Supprimé: .

Supprimé: .

Supprimé: from marine (bare and vegetated) sediments or thawing ... [96]

Supprimé: the water column, especially

Supprimé: (USEPA, 2010b);

Supprimé: leaks from

Supprimé: ); and (4) emission from the destabilisation of marine ... [97]

Supprimé: , methane

Supprimé: through

Supprimé: in a dissolved form (especially in the upwelling zone) ... [98]

Supprimé: ), for instance, in shallow waters

Supprimé: .

Supprimé: methane

Mis en forme : Police :Non Italique

Supprimé: Ramachandran

biogenic gas that is fossil ( $^{14}\text{C}$ -free). Coastal and oceanic “biogenic”  $\text{CH}_4$  refers to  $\text{CH}_4$  formed *in situ* in coastal and marine sediments and in the water column by recent or modern microbial activity (therefore with measurable amounts of radiocarbon ( $^{14}\text{C}$ )). To avoid double-counting, we assume that all diffusive  $\text{CH}_4$  emissions outside of geological seepage regions (identified in global grid maps; Etiope et al., 2019) are fuelled by biogenic  $\text{CH}_4$ . Finally, we briefly discuss the case of  $\text{CH}_4$  hydrates, which can be considered either a “geological” source when they host fossil  $\text{CH}_4$  or a “biogenic” source when they host modern  $\text{CH}_4$ .

**Coastal and oceanic modern biogenic methane emissions.** Area-integrated diffusive modern biogenic  $\text{CH}_4$  emissions from coastal ecosystems are 1-2 magnitudes lower than from inland freshwaters but significantly higher than biogenic emissions from the open ocean (Rosentreter et al., 2021; Rosentreter et al., 2023; Weber et al., 2019). Particularly the shallow vegetated coastline fringed by mangroves, salt marshes, and seagrasses is a  $\text{CH}_4$  hotspot in the coastal ocean, characterised by significantly higher flux densities than other coastal settings such as estuaries or the continental shelves (Rosentreter et al., 2021; Rosentreter et al., 2023). Coastal ecosystems are thus being increasingly recognized as weak global sources to the atmosphere (Weber et al., 2019; Saunois et al., 2020; Rosentreter et al., 2021). Hydrogenotrophic and acetoclastic methanogenesis are largely outcompeted by sulphate reduction in coastal/marine sediments, which is often shown by a decreasing trend of  $\text{CH}_4$  concentrations with increasing salinity from upper tidal (low salinity) to marine (high salinity) regions. Much of the  $\text{CH}_4$  produced below the sulfate-reduction zone is indeed re-oxidized by sedimentary anaerobic methane oxidation or re-oxidized in the water column, leading to small emissions despite much larger production (Knittel and Boetius 2009; Regnier et al., 2011). Methylated compounds such as methylamines and methyl sulphides are non-competitive substrates that are exclusively used by methanogens, therefore methylated methanogenesis can occur in coastal regions with high sulphate concentrations, for example, in organic-rich (Maltby et al., 2018), vegetated (Schorn et al., 2022), and hypersaline coastal sediments (Xiao et al., 2018). Coastal  $\text{CH}_4$  can be driven by the exchange of pore water or groundwater (high in  $\text{CH}_4$ ) with coastal surface waters in tidal systems, referred to as tidal pumping (Ovalle et al., 1990; Call et al., 2015). Anthropogenic impacts such as wastewater pollution and land-use change can increase  $\text{CH}_4$  fluxes in estuaries (Wells et al., 2020). A large increase of  $\text{CH}_4$  emissions follows the conversion of natural coastal habitats to aquaculture farms (Yuan et al., 2019; Yang et al., 2022).

Currently available global modern biogenic  $\text{CH}_4$  flux data show high spatiotemporal variability within and between coastal systems, but also because of the overall global paucity of data. Therefore, global estimates have high uncertainties and show large ranges in both empirical (Rosentreter et al., 2021) and machine-learning based approaches (Weber et al., 2019). According to a recent data-driven meta-data analysis, global estuaries, including tidal systems and deltas, lagoons, and fjords, are estimated to emit median (Q1-Q3) 0.25 (0.07-0.46)  $\text{Tg CH}_4 \text{ yr}^{-1}$  (Rosentreter et al., 2023). Coastal vegetation, including mangrove forests, salt marshes, and seagrasses are estimated to emit 0.77 (0.47-1.41)  $\text{Tg CH}_4 \text{ yr}^{-1}$ , which is 3 times more than global estuaries (Rosentreter et al., 2023). The combined median (Q1-Q3) emission of 1.01 (0.54-1.87)  $\text{Tg CH}_4 \text{ yr}^{-1}$  for coastal vegetation and estuaries by Rosentreter et al. (2023) is lower than the recent observation-based global

1010 synthesis including tidal flats and aquaculture ponds (median 1.49 (0.22-6.48) Tg CH<sub>4</sub> yr<sup>-1</sup>) by Rosentreter et al. (2021).  
 1011 Total shallow coastal modern biogenic CH<sub>4</sub> emissions based on existing data including emissions from estuaries, coastal  
 1012 vegetation (Rosentreter et al., 2023), tidal flats, and man-made coastal aquaculture ponds (Rosentreter et al., 2021) amount  
 1013 to median (Q1-Q3) 1.8 (0.59-5.57) Tg CH<sub>4</sub> yr<sup>-1</sup>. This range is about 3-4 times lower than the earlier global assessment by  
 1014 Borges and Abril (2011) and also lower than the value of 4-5 Tg CH<sub>4</sub> yr<sup>-1</sup> reported in the previous CH<sub>4</sub> budget for inner and  
 1015 outer estuaries including marshes and mangroves (Saunois et al., 2020), which was based on a significantly smaller dataset  
 1016 (n=80) and larger estuarine surface areas (Laruelle et al., 2013) than used here (Laruelle et al., 2023).  
 1017 The near-shore (0-50 m), inner shelf diffusive modern biogenic CH<sub>4</sub> flux of median (Q1-Q3) 1.33 (0.93-2.10) Tg CH<sub>4</sub> yr<sup>-1</sup>  
 1018 by Weber et al. (2019) based on machine-learning is similar to the combined shallow coastal (estuaries and coastal  
 1019 vegetation) median by Rosentreter et al. (2021, 2023). Adding the diffusive modern biogenic CH<sub>4</sub> flux for the outer shelf  
 1020 (50-200 m) (median (Q1-Q3) of 0.54 (0.40-0.73) Tg CH<sub>4</sub> yr<sup>-1</sup>) and for the slope (200-2000m) (median (Q1-Q3) of 0.28  
 1021 (0.22-0.37) Tg CH<sub>4</sub> yr<sup>-1</sup>) (Weber et al., 2019), and excluding geological seepage regions (Etiope et al., 2019; see below),  
 1022 gives a total median (Q1-Q3) of 3.95 (2.14-8.77) Tg CH<sub>4</sub> yr<sup>-1</sup> for combined coastal shallow, near-shore, outer shelf and  
 1023 slope diffusive modern biogenic CH<sub>4</sub> emissions. The previous budget by Saunois (2020) also included poorly constrained  
 1024 emissions (upper bound value: 1-2 Tg CH<sub>4</sub> yr<sup>-1</sup>) from large river plumes protruding onto the shelves. However, here we  
 1025 assume that emissions from large river plumes are accounted for in the near-shore and outer shelf estimates by Weber et al.  
 1026 (2019). Area-integrated diffusive CH<sub>4</sub> emissions from the open ocean and deep seas (>2000 m) are much lower than from  
 1027 other coastal systems but amount to median (Q1-Q3) 0.91 (0.75-1.12) Tg CH<sub>4</sub> yr<sup>-1</sup> because of the large surface area of the  
 1028 open ocean (>300 x 10<sup>6</sup> km<sup>2</sup>) (Weber et al., 2019). Overall, these marine biogenic emissions are sustained by a mixture of  
 1029 sedimentary production and in-situ production in the sea-surface layers, as shown by, e.g., Karl et al. (2008) and Repeta et  
 1030 al. (2016). The total coastal and ocean diffusive modern biogenic emissions retained here amount to 5 (3-10) Tg CH<sub>4</sub> yr<sup>-1</sup>.  
 1031  
 1032 **Coastal and oceanic geological methane emissions** Submarine geological CH<sub>4</sub> emission is the offshore component of the  
 1033 general geological emissions of natural gas from the Earth's crust (Judd, 2004; Etiope, 2009; Etiope et al., 2019). The  
 1034 onshore components include terrestrial seeps, mud volcanoes, microseepage, and geothermal manifestations, addressed in  
 1035 Sect. 3.2.3. Natural gas seeping at the seabed as bubble plumes can reach the surface, generally occurs in relatively shallow  
 1036 waters (<400 m), but CH<sub>4</sub>-rich bubble plumes reaching the atmosphere from depths >500 m have been observed in some  
 1037 cases (e.g., Solomon et al., 2009), and upwelling of bottom marine waters can, in theory, transport geological  
 1038 CH<sub>4</sub> (dissolved) to the surface from any depth. This represents, however, a small and poorly known fraction of geological  
 1039 CH<sub>4</sub> emission. Geological CH<sub>4</sub> can be either microbial or thermogenic, produced throughout diverse geological periods in  
 1040 hydrocarbon source rocks in sedimentary basins (therefore it is always fossil, <sup>14</sup>C-free). The seepage at the seafloor is  
 1041 typically related to tectonic faults, sometimes forming mud diapirs and mud volcanoes (Mazzini and Etiope, 2017).

3042 Published estimates of geological CH<sub>4</sub> submarine emissions range from 3 to 20 Tg yr<sup>-1</sup>, with a best guess of 7 Tg yr<sup>-1</sup> (Etiopie  
 3043 and Schwietzke, 2019; Etiopie et al., 2019 and references therein).  
 3044 Here, the diffusive geological CH<sub>4</sub> emissions are estimated at 0.16 (0.11-0.24) Tg CH<sub>4</sub> yr<sup>-1</sup> for near-shore (0-50 m), 0.03  
 3045 (0.02-0.05) Tg CH<sub>4</sub> yr<sup>-1</sup> for outer shelf (50-200 m), and 0.02 (0.01-0.03) Tg CH<sub>4</sub> yr<sup>-1</sup> for slope (200-2000 m) by calculating  
 3046 the fraction of the Weber et al. (2019) diffusive fluxes that occur within the identified geological seepage regions from  
 3047 Etiopie et al. (2019). No geological seepage regions were identified in the open ocean and deep seas (> 2000 m).  
 3048 In this study, we consider the ebullitive flux as geologically sourced CH<sub>4</sub>. While modern biogenic CH<sub>4</sub> gas production  
 3049 appears ubiquitous in shallow sediments (Fleischer et al., 2001; Best et al., 2006), no global dataset is currently available to  
 3050 estimate the biogenic ebullitive CH<sub>4</sub> flux to the atmosphere. Omission of this flux thus constitutes a significant knowledge  
 3051 gap in the coastal and oceanic CH<sub>4</sub> budget. Global geological CH<sub>4</sub> ebullition from continental shelf and slope, referring only  
 3052 to depths <200 m, were estimated at 5.06 (1.99-8.16) Tg CH<sub>4</sub> yr<sup>-1</sup> (Weber et al., 2019). This estimate is based on prior  
 3053 estimates of the geological flux from the seafloor (Hovland et al., 1993) and bubble transfer efficiency to the ocean surface  
 3054 (McGinnis et al., 2006). Etiopie et al. (2019) estimated a partial fraction of geological emissions in the form of gas bubbles  
 3055 of 3.9 (1.8-6) Tg CH<sub>4</sub> yr<sup>-1</sup>, only referring to the sum of published estimates from 15 geological seepage regions, which are  
 3056 also deeper than 200 m. Global extrapolation including other 16 identified seepage zones (where flux data are not available)  
 3057 was suggested to be at least 7 (3-10) Tg CH<sub>4</sub> yr<sup>-1</sup> (Etiopie et al., 2019), and this value coincides with the mean emission value  
 3058 (best guess) derived by combining literature data, see Etiopie and Schwietzke (2019) for further details. It is worth noting  
 3059 that the Weber et al. (2019) estimate of 5.06 (1.99-8.16) Tg CH<sub>4</sub> yr<sup>-1</sup>, which considers only the continental shelf at depths  
 3060 <200 m, is compatible with the overall submarine emission of 7 (3-10) Tg CH<sub>4</sub> yr<sup>-1</sup> (including seeps > 200 m deep) indicated  
 3061 in Etiopie and Schwietzke (2019) and Etiopie et al. (2019). Although 300-400 m is considered a general depth limit for  
 3062 efficient transport (with limited oxidation and dissolution) of CH<sub>4</sub> bubbles to the atmosphere (e.g., Judd, 2004; Schmale et  
 3063 al., 2005; Etiopie et al., 2019), in some cases oil coatings on bubbles inhibit gas dissolution so that CH<sub>4</sub>-rich bubbles can  
 3064 reach the atmosphere from depths >500 m (e.g., Solomon et al., 2009). As mentioned above, a fraction of geological CH<sub>4</sub>  
 3065 released in deep seas (such as in the areas with gas-charged sediments inventoried in Fleischer et al., 2001) can also be  
 3066 transported to the surface by upwelling bottom waters. Further research is needed to better evaluate the atmospheric impact  
 3067 of such deep seeps.  
 3068 Geological submarine emissions, thus, would amount to 0.21 (0.14-0.32) Tg CH<sub>4</sub> yr<sup>-1</sup> in the form of a diffusive flux while  
 3069 the ebullitive flux would be 5.06 (3.01-7.88) Tg CH<sub>4</sub> yr<sup>-1</sup>, considering only < 200 m deep seepage, and 7 (3-10) Tg CH<sub>4</sub> yr<sup>-1</sup>  
 3070 considering all data available (Etiopie and Schwietzke, 2019). Here, we select the Etiopie and Schwietzke (2019) assessment  
 3071 in order to account for all potential seepage areas, including those located at water depths > 200m.  
 3072  
 3073 As a result, here we report a (rounded) median of 12 Tg CH<sub>4</sub> yr<sup>-1</sup> with a range of 6-20 Tg CH<sub>4</sub> yr<sup>-1</sup> for all coastal and ocean  
 3074 sources.



1075  
1076 Methane emissions from gas hydrates. Among the different origins of coastal and oceanic CH<sub>4</sub> hydrates have attracted a  
1077 lot of attention. CH<sub>4</sub> hydrates (or clathrates) are ice-like crystals formed under specific temperature and pressure conditions  
1078 (Milkov, 2005). Hydrates may host either modern microbial CH<sub>4</sub> containing <sup>14</sup>C and formed *in situ* in shallow sediments  
1079 (this type of hydrates is also called “autochthonous”) or fossil, microbial or thermogenic CH<sub>4</sub>, migrated from deeper  
1080 sediments, generally from reservoirs in hydrocarbon-rich sedimentary basins (this type of hydrates is also called  
1081 “allochthonous”; Milkov, 2005; Foschi et al., 2023). The total stock of marine CH<sub>4</sub> hydrates is large but uncertain, with  
1082 global estimates ranging from hundreds to thousands of Pg CH<sub>4</sub> (Klauda and Sandler, 2005; Wallmann et al., 2012). Note  
1083 that the highly climate-sensitive subsea permafrost reservoir beneath Arctic Ocean shelves also contributes to the hydrate  
1084 inventory (Ruppel and Kassler, 2017).

1085 Concerning more specifically atmospheric emissions from marine hydrates, Etiope (2015) points out that current estimates  
1086 of CH<sub>4</sub> air-sea flux from hydrates (2–10 Tg CH<sub>4</sub> yr<sup>-1</sup> in Ciais et al., 2013, or Kirschke et al., 2013) originate from the  
1087 hypothetical values of Cicerone and Oremland (1988). No experimental data or estimation procedures have been explicitly  
1088 described along the chain of references since then (Denman et al., 2007; IPCC, 2001; Kirschke et al., 2013; Lelieveld et al.,  
1089 1998). It was estimated that ~473 Tg CH<sub>4</sub> has been released into the water column over 100 years (Kretschmer et al., 2015).  
1090 Those few teragrams per year become negligible once consumption within the water column has been accounted for. While  
1091 events such as submarine slumps may trigger local releases of considerable amounts of CH<sub>4</sub> from hydrates that may reach  
1092 the atmosphere (Etiope, 2015; Paull et al., 2002), on a global scale, present-day atmospheric CH<sub>4</sub> emissions from hydrates  
1093 do not appear to be a significant source to the atmosphere, and at least formally, we should consider 0 (< 0.1) Tg CH<sub>4</sub> yr<sup>-1</sup>  
1094 emissions.

1095 **3.2.7 Terrestrial permafrost**

1096 Permafrost is defined as frozen soil, sediment, or rock having temperatures at or below 0°C for at least two consecutive  
1097 years (Harris et al., 1988). The total extent of permafrost in the Northern Hemisphere is about 14 million km<sup>2</sup> or 15% of the  
1098 exposed land surface (Obu et al., 2019). As the climate warms, a rise in soil temperatures has been observed across the  
1099 permafrost region, and permafrost thaw occurs when temperatures pass 0°C, often associated with melting of ice in the  
1100 ground (Biskaborn et al., 2019). Permafrost thaw is most pronounced in southern and spatially isolated permafrost zones,  
1101 but also occurs in northern continuous permafrost (Obu et al., 2019). Thaw occurs either as a gradual, often widespread,  
1102 deepening of the active layer (surface soils that thaw every summer) or as more rapid localised thaw associated with loss of  
1103 massive ground ice (thermokarst) (Turetsky et al., 2020). A total of 1000 ± 200 Pg of carbon can be found in the upper 3  
1104 meters of permafrost region soils, or 1400-2000 Pg C for all permafrost (Hugelius et al., 2014; Strauss et al., 2021 ).

**Supprimé:** Biogenic emissions from open and coastal ocean. The most common biogenic ocean emission value found in the literature is 10 Tg CH<sub>4</sub> yr<sup>-1</sup> (Rhee et al., 2009b). It appears that most studies rely on the work of Ehrlert (1974), where the value was estimated on the basis of the measurements done by Swinnerton and co-workers (Lamontagne et al., 1973; Swinnerton and Linnenbom, 1967) for the open ocean, combined with purely speculated emissions from the continental shelf. Based on basin-wide observations using updated methodologies, three studies found estimates ranging from 0.2 to 3 Tg CH<sub>4</sub> yr<sup>-1</sup> (Bates et al., 1996; Conrad and Seiler, 1988; Rhee et al., 2009b), associated with super-saturations of surface waters that are an order of magnitude smaller than previously estimated, both for the open ocean (saturation anomaly ~0.04, see Rhee et al. (2009a), equation 4) and for continental shelf (saturation anomaly ~0.2). In their synthesis, indirectly referring to the original observations from Lambert and Schmidt (1993), Wuebbles and Hayhoe (2002), they use a value of 5 Tg CH<sub>4</sub> yr<sup>-1</sup>. Proposed explanations for discrepancies regarding sea-to air methane emissions in the open ocean rely on experimental biases in the former studies of Swinnerton and Linnenbom (Rhee et al., 2009b). This may explain why the Bange et al. (1994) compilation cites a global source of 11-18 Tg CH<sub>4</sub> yr<sup>-1</sup> with a dominant contribution of coastal regions. Here, we report a range of 0-5 Tg CH<sub>4</sub> yr<sup>-1</sup>, with a mean value of 2 Tg CH<sub>4</sub> yr<sup>-1</sup> for biogenic emissions from open and coastal ocean (excluding estuaries). Biogenic emissions from brackish waters (estuaries, coastal wetlands) were not reported in the previous budget (Saunio et al., 2016). Methane emissions from estuaries were originally estimated by Bange et al. (1994), Upstill-Goddard et al. (2000) and Middelburg et al. (2002) to be comprised between 1 and -3 Tg CH<sub>4</sub> yr<sup>-1</sup>. This range was later revised upwards by Borges and Abril (2011) to about 7 Tg CH<sub>4</sub> yr<sup>-1</sup> based on a methodology distinguishing between different estuarine types and accounting for the contribution of tidal flats, marshes and mangroves, for a total of 39 systems and a global “inner” estuarine surface area of 1.1 10<sup>6</sup> km<sup>2</sup> (Laruelle et al., 2013). The same methodology as in Laruelle et al. (2013) has been applied here to the same systems using an expanded database of local and regional measurements (72 systems) and suggests however that global estuarine CH<sub>4</sub> emissions were overestimated and may actually not surpass 3-3.5 Tg CH<sub>4</sub> yr<sup>-1</sup>. Despite this overall reduction, the specific contribution of sediment and water emissions from mangrove ecosystems is however higher and contributes <0.1 to 1.7 Tg CH<sub>4</sub> yr<sup>-1</sup> globally (Rosentretter et al., 2018). This estuarine estimate does not include the uncertain contribution from large river plumes protruding

**Supprimé:** and hydrates

**Mis en forme :** Normal, Espace Avant : 12 pt, Après : 12 pt, Paragraphes solidaires, Bordure : Haut: (Pas de bordure), Bas: (Pas de bordure), Gauche: (Pas de bordure), Droite: (Pas de bordure), Entre : (Pas de bordure)

**Mis en forme :** Police :Gras, Couleur de police : Noir

**Mis en forme :** Police :Gras, Couleur de police : Noir

**Supprimé:** Permafrost is defined as frozen soil, sediment, or rock having temperatures at or below 0°C for at least two consecutive years (Harris et al., 1988). The total extent of permafrost in the Northern Hemisphere is about 14 million km<sup>2</sup> or 15% of the exposed land surface (Obu et al., 2019). As the climate warms, large areas of permafrost are also warming, and if soil temperatures pass 0°C, thawing of the permafrost occurs. Permafrost thaw is most pronounced in southern and spatially isolated permafrost zones, but also occurs in northern continuous permafrost (Obu et al., 2019)

The thawing permafrost can generate direct and indirect CH<sub>4</sub> emissions. Direct CH<sub>4</sub> emissions are from the release of CH<sub>4</sub> contained within the thawing permafrost. This flux to the atmosphere is small and estimated to be a maximum of 1 Tg CH<sub>4</sub> yr<sup>-1</sup> at present (USEPA, 2010b). Increased seepage of geogenic CH<sub>4</sub> gas seeps along permafrost boundaries and lake beds may also be considered a direct flux, and this is estimated to be 2±0.4 Tg CH<sub>4</sub> yr<sup>-1</sup> (Walter Anthony et al., 2012). Indirect CH<sub>4</sub> emissions are probably more important. They are caused by 1) methanogenesis induced when the organic matter contained in thawing permafrost becomes available for microbial decomposition; 2) thaw induced soil wetting and changes in land surface hydrology possibly enhancing CH<sub>4</sub> production (McCalley et al., 2014; Schuur et al., 2022); and 3) the landscape topography changes driven by abrupt thaw processes and loss of ground ice, including the formation of thermokarst lakes, hill-slope thermokarst, and wetland thermokarst (Turetsky et al., 2020). Such CH<sub>4</sub> production is probably already significant today and is likely to become more important in the future associated with climate change and strong positive feedback from thawing permafrost (Schuur et al., 2022). However, indirect CH<sub>4</sub> emissions from permafrost thawing are difficult to estimate at present, with very few data to refer to, and in any case largely overlap with wetland and freshwater emissions occurring above or around thawing areas. In a recent synthesis of full permafrost region CH<sub>4</sub> budgets for the period 2000-2017, Hugelius et al. (2023) compared CH<sub>4</sub> budgets from bottom-up and top-down (atmospheric inversion models) approaches. They estimate an integrated bottom-up budget of 50 (23, 53; mean upper and lower 95% CI) Tg CH<sub>4</sub> yr<sup>-1</sup> while the top-down estimate is 19 (15, 24) Tg CH<sub>4</sub> yr<sup>-1</sup>. The bottom-up estimate is based on a combination of data-driven upscaling reported by Ramage et al. (2023) and process-based model estimates for wetland CH<sub>4</sub> flux calculated from model ensembles used in Saunio et al. (2020). The top-down estimate is calculated from ensembles of atmospheric inversion models used in Saunio et al. (2020). Although it is difficult with direct process-attribution, fluxes of ca. 20-30 Tg CH<sub>4</sub> yr<sup>-1</sup> in the bottom-up budget are caused by land cover types affected by previous permafrost thaw (thermokarst lakes, wetlands, hillslope). Because pre-thaw land cover types often have near neutral CH<sub>4</sub> balances (Ramage et al. 2023), these fluxes can largely be seen as driven by permafrost thaw, however the thaw may have occurred decades, or even centuries, before today.

Here, we choose to report only the direct emission range of 0-1 Tg CH<sub>4</sub> yr<sup>-1</sup>, keeping in mind that current wetland, thermokarst lakes and other freshwater methane emissions already likely include a significant indirect contribution originating from thawing permafrost.

### 3.2.8 Vegetation

Three distinct pathways for the production and emission of CH<sub>4</sub> by living vegetation are considered here (see Covey and Megonigal (2019) and Bastviken et al. (2023) for extensive reviews). Firstly, plants produce CH<sub>4</sub> through an abiotic photochemical process induced by stress (Keppler et al., 2006). This pathway was initially questioned (e.g., Dueck et al., 2007; Nisbet et al., 2009), and although numerous studies have since confirmed aerobic emissions from plants and better resolved its physical drivers (Fraser et al., 2015), global estimates still vary by two orders of magnitude (Liu et al., 2015).

**Mis en forme :** Police :Gras, Couleur de police : Noir

**Mis en forme :** Normal, Espace Avant : 12 pt, Après : 12 pt, Paragraphes solidaires, Bordure : Haut: (Pas de bordure), Bas: (Pas de bordure), Gauche: (Pas de bordure), Droite: (Pas de bordure), Entre : (Pas de bordure)

**Supprimé:** Three distinct pathways for the production and emission of methane by living vegetation are considered here (see Covey and Megonigal (2019) for an extensive review). Firstly, plants produce methane through an abiotic photochemical process induced by stress (Keppler et al., 2006). This pathway was initially criticized (e.g. Dueck et al., 2007; Nisbet et al., 2009), and although numerous studies have since confirmed aerobic emissions from plants and better resolved its physical drivers (Fraser et al., 2015), global estimates still vary by two orders of magnitude (Liu et al., 2015). This plant source has not been confirmed in-field however, and although the potential implication for the global methane budget remains unclear, emissions from this source are certainly much smaller than originally estimated in Keppler et al. (2006) (Bloom et al., 2010; Fraser et al., 2015). Second, and of clearer significance, plants act as "straws", drawing up and releasing microbially produced methane from anoxic soils (Cicerone and Shetter, 1981; Rice et al., 2010). For instance, in the forested wetlands of Amazonia, tree stems are the dominant ecosystem flux pathway for soil-produced methane, therefore, including stem emissions in ecosystem budgets can reconcile regional bottom-up and top-down estimates (Pangala et al., 2017). Third, the stems of both living trees (Covey et al., 2012) and dead wood (Covey et al., 2016) provide an environment suitable for microbial methanogenesis. Static chambers demonstrate locally significant through-bark flux from both soil- (Pangala et al., 2013, 2015), and tree stem-based methanogens (Pitz and Megonigal, 2017; Wang et al., 2016). A recent synthesis indicates stem CH<sub>4</sub> emissions significantly increase the source strength of forested wetlands, and modestly decrease the sink strength of upland forests (Covey and Megonigal, 2019). The scientific activity covering CH<sub>4</sub> emissions in forested ecosystems reveals a far more complex story than previously thought, with an interplay of, productive/consumptive, aerobic/anaerobic, biotic/abiotic, processes occurring between upland/wetland soils, trees, and atmosphere. Understanding the complex processes that regulate CH<sub>4</sub> source-sink dynamics in forests and estimating their contribution to the global methane budget requires cross-disciplinary research, more observations, and new models that can overcome the classical binary classifications of wetland versus upland forest and of emitting versus uptaking soils (Barba et al., 2019; Covey and Megonigal, 2019). Although we recognize these emissions are potentially large (particularly tree transport from inundated soil), global estimates for each of these pathways remain highly uncertain and/or are currently ascribed here to other flux categories sources (e.g. inland waters, wetlands, upland soils).

### 3.3 Methane sinks and lifetime

Methane is the most abundant reactive trace gas in the troposphere and its reactivity is important to both tropospheric and stratospheric chemistry. The main atmospheric sink of methane (~90% of the total sink mechanism) is oxidation by the hydroxyl radical (OH), mostly in the troposphere (Ehhalt, 1974). Other losses are by photochemistry in the stratosphere (reactions with chlorine atoms (Cl) and excited atomic oxygen (O(<sup>1</sup>D))), oxidation in soils (Curry, 2007; Dutaur and Verchot, 2007), and by photochemistry in the marine boundary layer (reaction with Cl; Allan et al. (2007), Thornton et al. (2010)). Uncertainties in the total sink of methane as estimated by atmospheric chemistry models are in the order of 20-40% (Saunio et al., 2020).

This plant source has not been confirmed in-field however, and although the potential implication for the global CH<sub>4</sub> budget remains unclear, emissions from this source are certainly much smaller than originally estimated in Keppler et al. (2006) (Bloom et al., 2010; Fraser et al., 2015). Second, and of clearer significance, plants act as “straws”, drawing up and releasing microbially produced CH<sub>4</sub> from anoxic soils (Cicerone and Shetter, 1981; Rice et al., 2010). For instance, in the forested wetlands of Amazonia, tree stems are the dominant ecosystem flux pathway for soil-produced CH<sub>4</sub>, therefore, including stem emissions in ecosystem budgets can reconcile regional bottom-up and top-down estimates (Pangala et al., 2017; Gauci et al., 2021). Third, the stems of both living trees (Covey et al., 2012) and dead wood (Covey et al., 2016) provide an environment suitable for microbial methanogenesis. Static chambers demonstrate locally significant through-bark flux from both soil- (Pangala et al., 2013, 2015), and tree stem-based methanogens (Pitz and Megonigal, 2017; Wang et al., 2016). A recent synthesis indicates stem CH<sub>4</sub> emissions significantly increase the source strength of forested wetlands, and modestly decrease the sink strength of upland forests (Covey and Megonigal, 2019). The scientific activity covering CH<sub>4</sub> emissions in forested ecosystems reveals a far more complex story than previously thought, with an interplay of productive/consumptive, aerobic/anaerobic, and biotic/abiotic processes occurring between upland/wetland soils, trees, and atmosphere. Understanding the complex processes that regulate CH<sub>4</sub> source–sink dynamics in forests and estimating their contribution to the global CH<sub>4</sub> budget requires cross-disciplinary research, more observations, and new models that can overcome the classical binary classifications of wetland versus upland forest and of emitting versus uptaking soils (Barba et al., 2019; Covey and Megonigal, 2019). Although we recognize these emissions are potentially large (particularly tree transport from inundated soil), global estimates for each of these pathways remain highly uncertain and/or are currently included here within other flux category sources (e.g. inland waters, wetlands, upland soils).

### 3.3 Methane sinks and lifetime

CH<sub>4</sub> is the most abundant reactive trace gas in the troposphere and its reactivity is important to both tropospheric and stratospheric chemistry. The main atmospheric sink of CH<sub>4</sub> (~90% of the total sink mechanism) is oxidation by the hydroxyl radical (OH), mostly in the troposphere (Ehhalt, 1974). Other losses are by photochemistry in the stratosphere (reactions with chlorine atoms (Cl) and excited atomic oxygen (O(<sup>1</sup>D))), oxidation in soils (Curry, 2007; Dutaur and Verchot, 2007), and by photochemistry in the marine boundary layer (reaction with Cl; Allan et al. (2007), Thornton et al. (2010)). Uncertainties in the total sink of CH<sub>4</sub> as estimated by atmospheric chemistry models are in the order of 20–40% (Saunio et al., 2016). It is much less (10–20%) when using atmospheric proxy methods (e.g., methyl chloroform, see below) as in atmospheric inversions (Saunio et al., 2016). In the present release of the global CH<sub>4</sub> budget, we estimate bottom-up CH<sub>4</sub> chemical sinks and lifetime mainly based on global model results from the Chemistry Climate Model Initiative (CCMI) 2022 activity (Plummer et al., 2021) and CMIP6 simulations (Collins et al., 2017).

3448 **3.3.1 Tropospheric OH oxidation**

3449 OH radicals are produced following the photolysis of ozone (O<sub>3</sub>) in the presence of water vapour. OH is destroyed by

3450 reactions with **carbon monoxide (CO)**, CH<sub>4</sub>, and non-methane volatile organic compounds.

3451 Following the Atmospheric Chemistry and Climate Model Intercomparison Project (ACCMIP), which studied the long-term

3452 changes in atmospheric composition between 1850 and 2100 (Lamarque et al., 2013), a new series of experiments was

3453 conducted by several chemistry-climate models and chemistry-transport models participating in the Chemistry-Climate

3454 Model Initiative (CCMI) (Plummer et al., 2021). Mass-weighted OH tropospheric concentrations do not directly represent

3455 CH<sub>4</sub> loss, as the spatial and vertical distributions of OH affect this loss through, in particular, the temperature dependency

3456 and the distribution of CH<sub>4</sub> (e.g., Zhao et al., 2019). However, estimating OH concentrations and, spatial and vertical

3457 distributions is a key step in estimating methane loss through OH. Over the period 2000-2010, the global mass-weighted

3458 OH tropospheric concentration is estimated at 13.3 [11.7-18.2] x 10<sup>5</sup> molecules cm<sup>-3</sup> by 8 CCMI-2022 models and at 11.5

3459 [7.9-13.5] x 10<sup>5</sup> molecules cm<sup>-3</sup> by 10 models contributing CMIP6 (see supplementary Table S4). The ranges calculated

3460 here are larger than the ones proposed previously in Saunio et al. (2020), where the multi-model mean (11 models) global

3461 mass-weighted OH tropospheric concentration was 11.7±1.0 x 10<sup>5</sup> molecules cm<sup>-3</sup> (range 9.9-14.4 x 10<sup>5</sup> molecules cm<sup>-3</sup>,

3462 Zhao et al. (2019)) consistent with the previous estimates from ACCMIP (11.7±1.0 x 10<sup>5</sup> molecules cm<sup>-3</sup>, with a range of

3463 10.3-13.4 x 10<sup>5</sup> molecules cm<sup>-3</sup>, Voulgarakis et al. (2013) for year 2000) and the estimates of Prather et al. (2012) of 11.2±1.3

3464 x 10<sup>5</sup> molecules cm<sup>-3</sup>. Nicely et al. (2017) attribute the differences in OH simulated by different chemistry transport models

3465 to, in decreasing order of importance, different chemical mechanisms, various treatments of the photolysis rate of O<sub>3</sub>, and

3466 modelled O<sub>3</sub> and CO. Besides the uncertainty on global OH concentrations, there is an uncertainty in the spatial and temporal

3467 distribution of OH. Models often simulate higher OH in the northern hemisphere (NH) than in the southern hemisphere

3468 (SH), leading to a NH/SH OH ratio greater than 1 (Naik et al., 2013; Zhao et al., 2019). However, there is evidence for

3469 parity in inter-hemispheric OH concentrations (Patra et al., 2014), which needs to be confirmed by other observational and

3470 model-derived estimates. The analysis of the latest CCMI (Plummer et al., 2021) and CMIP6 (Collins et al., 2021) model

3471 outputs show that structural uncertainties in the atmospheric chemistry models remain large, probably due to inherent biases

3472 in OH precursors. Based on OH precursor observations and a chemical box model, Zhao et al. (2023) corrected the OH 3D

3473 fields simulated by two atmospheric chemistry models, resulting in tropospheric OH mean concentrations lowered by 2 · 10<sup>5</sup>

3474 molecules cm<sup>-3</sup>, leading to around 10 x 10<sup>5</sup> molecules cm<sup>-3</sup>, and a NH/SH OH ratio closer to 1, in better agreement with

3475 methyl chloroform (MCF)-based approaches. This study highlights the need for further improvement of the atmospheric

3476 chemistry model.

3477 OH concentrations and their changes can be sensitive to climate variability (Dlugokencky et al., 1996; Holmes et al., 2013;

3478 Turner et al., 2018), biomass burning (Voulgarakis et al., 2015), and anthropogenic activities. For instance, the increase of

3479 the oxidizing capacity of the troposphere in South and East Asia associated with increasing NO<sub>x</sub> emissions (Mijling et al.,

3480 2013) and decreasing CO emissions (Yin et al., 2015), possibly enhances CH<sub>4</sub> oxidation and therefore limits the atmospheric

**Mis en forme :** Police :Gras, Couleur de police : Noir

**Mis en forme :** Police :Gras, Couleur de police : Noir

**Mis en forme :** Normal, Espace Avant : 12 pt, Après : 12 pt, Paragraphes solidaires, Bordure : Haut: (Pas de bordure), Bas: (Pas de bordure), Gauche: (Pas de bordure), Droite: (Pas de bordure), Entre : (Pas de bordure)

**Supprimé:**

**Supprimé :**

**Supprimé:** Following the Atmospheric Chemistry and Climate Model Intercomparison Project (ACCMIP), which studied the long-term changes in atmospheric composition between 1850 and 2100 (Lamarque et al., 2013), a new series of experiments was conducted by several chemistry-climate models and chemistry-transport models participating in the Chemistry-Climate Model Initiative (CCMI) (Morgenstern et al., 2017). Mass-weighted OH tropospheric concentrations do not directly represent methane loss, as the spatial and vertical distributions of OH affect this loss, through, in particular, the temperature dependency and the distribution of methane (e.g. Zhao et al., 2019). However, estimating OH concentrations and, spatial and vertical distributions is a key step in estimating methane loss through OH. Over the period 2000-2010, the multi-model mean (11 models) global mass-weighted OH tropospheric concentration was 11.7±1.0 x 10<sup>5</sup> molecules cm<sup>-3</sup> (range 9.9-14.4 x 10<sup>5</sup> molecules cm<sup>-3</sup>, Zhao et al. (2019)) consistent with the previous estimates from ACCMIP (11.7±1.0 x 10<sup>5</sup> molecules cm<sup>-3</sup>, with a range of 10.3-13.4 x 10<sup>5</sup> molecules cm<sup>-3</sup>, Voulgarakis et al. (2013) for year 2000) and the estimates of Prather et al. (2012) at 11.2±1.3 x 10<sup>5</sup> molecules cm<sup>-3</sup>. Nicely et al. (2017) attribute the differences in OH simulated by different chemistry transport models to, in decreasing order of importance, different chemical mechanisms, various treatment of the photolysis rate of ozone, and modeled ozone and carbon monoxide. Besides the uncertainty on global OH concentrations, there is an uncertainty in the spatial and temporal distribution of OH. Models often simulate higher OH in the northern hemisphere leading to a NH/SH OH ratio greater than 1 (Naik et al., 2013; Zhao et al., 2019). However, there is evidence for parity in inter-hemispheric OH concentrations (Patra et al., 2014), which needs to be confirmed by other observational and model-derived estimates.¶ OH concentrations and their changes can be sensitive to climate variability (Dlugokencky et al., 1996; Holmes et al., 2013; Turner et al., 2018), biomass burning (Voulgarakis et al., 2015), and anthropogenic activities. For instance, the increase of the oxidizing capacity of the troposphere in South and East Asia associated with increasing NO<sub>x</sub> emissions (Mijling et al., 2013) and decreasing CO emissions (Yin et al., 2015), possibly enhances CH<sub>4</sub> oxidation and therefore limits the atmospheric impact of increasing emissions (Dalsoren et al., 2009). Despite such large regional changes, the global mean OH concentration was suggested to have changed only slightly over the past 150 years (Naik et al., 2013). This is due to the compensating effects of the concurrent increases of positive influences on OH (water vapour, tropospheric ozone, nitrogen oxides (NO<sub>x</sub>) emissions, and UV radiation due to decreasing stratospheric ozone), and of OH sinks (methane burden, carbon monoxide and non-methane volatile organic compound emissions and burden). CCMI models show OH inter-annual variability ranging from 0.4% to 1.8% (Zhao et al., 2019) over 2000-2010, lower than the value deduced from methyl chloroform measurements (proxy, top-down approach). However, these simulations consider meteorology variability but not emission interannual variability (e.g., from biomass burning) and 1021

599 impact of increasing emissions (Dalsøren et al., 2009). Despite such large regional changes, the global mean OH  
600 concentration was suggested to have changed only slightly over the past 150 years (Naik et al., 2013). This is due to the  
601 compensating effects of the concurrent increases of positive influences on OH (water vapour, tropospheric ozone, nitrogen  
602 oxides (NO<sub>x</sub>) emissions, and UV radiation due to decreasing stratospheric O<sub>3</sub>), and of OH sinks (CH<sub>4</sub> burden, CO and non-  
603 CH<sub>4</sub> volatile organic compound emissions and burden). CCMI models show OH inter-annual variability ranging from 0.4%  
604 to 1.8% (Zhao et al., 2019) over 2000-2010 (similar values are derived in the latest CCMI and CMIP6 activities - see  
605 supplementary Table S4), lower than the value deduced from methyl chloroform measurements (proxy, top-down approach).  
606 However, these simulations consider meteorology variability but not emission interannual variability (e.g., from biomass  
607 burning) and thus are expected to simulate lower OH inter annual variability than in reality. Using an empirical model  
608 constrained by global observations of O<sub>3</sub>, water vapour, CH<sub>4</sub>, and temperature as well as the simulated effects of changing  
609 NO<sub>x</sub> emissions and tropical expansion, Nicely et al. (2017) found an inter-annual variability in OH of about 1.3-1.6%  
610 between 1980 and 2015, in agreement with methyl chloroform based estimates (Montzka et al., 2011).  
611 Over 2000-2009, the tropospheric loss (tropopause height at 200 hPa) of CH<sub>4</sub> by OH oxidation derived from the ten and  
612 CCMI modelling activities (see supplementary Table S5) is estimated at of 546 [446-663] Tg CH<sub>4</sub> yr<sup>-1</sup>, which is similar to  
613 the one reported previously in Saunio et al. (2020) from CCMI model (553 [476-677] Tg CH<sub>4</sub> yr<sup>-1</sup>) and still slightly higher  
614 than the one from the ACCMIP models (528 [454-617] Tg CH<sub>4</sub> yr<sup>-1</sup> reported in Kirschke et al. (2013) and Saunio et al.  
615 (2016).  
616 For the recent 2010-2019 decade, we report a climatological value based on five models that contributed to CMIP6 runs  
617 (historic followed by SSP3-7.0 projections starting in 2015, Collins et al. (2021)) to acknowledge the impact of the rise in  
618 atmospheric methane on the methane chemical sink. Hence, for 2010-2019, we report the climatological value of 563 [510-  
619 663] Tg CH<sub>4</sub> yr<sup>-1</sup>

### 620 3.3.2 Stratospheric loss

621 In the stratosphere, CH<sub>4</sub> is lost through reactions with excited atomic oxygen O(<sup>1</sup>D), atomic chlorine (Cl), atomic fluorine  
622 (F), and OH (Brasseur and Solomon, 2005; le Texier et al., 1988). Uncertainties in the chemical loss of stratospheric CH<sub>4</sub> are  
623 large, due to uncertain inter-annual variability in stratospheric transport as well as its chemical interactions and feedbacks  
624 with stratospheric O<sub>3</sub> (Portmann et al., 2012). Particularly, the fraction of stratospheric loss due to the different oxidants is  
625 still uncertain, with possibly 20-35% due to halons, about 25% due to O(<sup>1</sup>D) mostly in the high stratosphere and the rest due  
626 to stratospheric OH (McCarthy et al., 2003).  
627 In this study, ten chemistry climate models that contributed to CMIP6 and CCMI modelling activities (Table S5) are used  
628 to provide estimates of CH<sub>4</sub> chemical loss, including reactions with OH, O(<sup>1</sup>D), and Cl; CH<sub>4</sub> photolysis is also included but  
629 occurs only above the stratosphere. Considering a 200 hPa tropopause height, the CMIP6 and CCMI results suggest an

Mis en forme : Police :Gras, Couleur de police : Noir

Mis en forme : Normal, Espace Avant : 12 pt, Après : 12 pt,  
Paragraphes solidaires, Bordure : Haut: (Pas de bordure), Bas:  
(Pas de bordure), Gauche: (Pas de bordure), Droite: (Pas de  
bordure), Entre : (Pas de bordure)

**Supprimé:** In the stratosphere, CH<sub>4</sub> is lost through reactions with  
excited atomic oxygen O(<sup>1</sup>D), atomic chlorine (Cl), atomic fluorine  
(F), and OH (Brasseur and Solomon, 2005; le Texier et al., 1988).  
Uncertainties in the chemical loss of stratospheric methane are large,  
due to uncertain inter-annual variability in stratospheric transport as  
well as its chemical interactions and feedbacks with stratospheric  
ozone (Portmann et al., 2012). Particularly, the fraction of  
stratospheric loss due to the different oxidants is still uncertain, with  
possibly 20-35% due to halons, about 25% due to O(<sup>1</sup>D) mostly in  
the high stratosphere and the rest due to stratospheric OH (McCarthy  
et al., 2003).  
In this study, seven chemistry climate models from the CCMI project  
(Table S4) are used to provide estimates of methane chemical loss,  
including reactions with OH, O(<sup>1</sup>D), and Cl; CH<sub>4</sub> photolysis is also  
included but occurs only above the stratosphere. Considering a 200  
hPa tropopause height, the CCMI models suggest an estimate of 31  
[12-37] Tg CH<sub>4</sub> yr<sup>-1</sup> for the methane stratospheric sink for the period  
2000-2010 (Table S4). The 20 Tg difference compared to the mean  
value reported by Kirschke et al. (2013) and Saunio et al. (2016) for  
the same period (51 [16-84] Tg CH<sub>4</sub> yr<sup>-1</sup>), is probably due to the  
plausible double-counting of O(<sup>1</sup>D) and Cl oxidations in our previous  
calculation, as the chemistry-climate models usually report the total  
chemical loss of methane (not OH oxidation only).  
We

estimate of 34 [10-51]Tg CH<sub>4</sub> yr<sup>-1</sup> for the CH<sub>4</sub> stratospheric sink for the 2000-2009 decade (Table S5), similar to the value derived from the previous CCMI activity reported in Saunio et al. (2020) (31 [12-41] Tg CH<sub>4</sub> yr<sup>-1</sup>). For 2010-2019, we report here a climatological range of 11-43 Tg CH<sub>4</sub> yr<sup>-1</sup> associated with a mean value of 33 Tg CH<sub>4</sub> yr<sup>-1</sup> based on five models that contributed to CMIP6 runs (historic followed by SSP3-7.0 projections starting in 2015; Table S5).

### 3.3.3 Tropospheric reaction with Cl

Halogen atoms can also contribute to the oxidation of CH<sub>4</sub> in the troposphere. Allan et al. (2005) measured mixing ratios of methane and δ<sup>13</sup>C-CH<sub>4</sub> at two stations in the southern hemisphere from 1991 to 2003, and found that the apparent kinetic isotope effect (KIE) of the atmospheric CH<sub>4</sub> sink was significantly larger than that explained by OH alone. A seasonally varying sink due to Cl in the marine boundary layer of between 13 and 37 Tg CH<sub>4</sub> yr<sup>-1</sup> was proposed as the explanatory mechanism (Allan et al., 2007; Platt et al., 2004). This sink was estimated to occur mainly over coastal and marine regions, where sodium chloride (NaCl) from evaporated droplets of seawater react with NO<sub>2</sub> to eventually form Cl<sub>2</sub>, which then UV-dissociates to Cl. However significant production of nitryl chloride (ClNO<sub>2</sub>) at continental sites has been recently reported (Riedel et al., 2014) and suggests the broader presence of Cl, which in turn would expand the significance of the Cl sink in the troposphere. Recently, Hossaini et al. (2016), Sherwen et al. (2016), and Wang et al. (2019b, 2021b) have made significant improvements in tropospheric chemistry modelling and they conclude to an oxidation contribution of 2.6%, 2%, 1% and 0.8%, respectively. These values correspond to a tropospheric CH<sub>4</sub> loss of around 12-13 Tg CH<sub>4</sub> yr<sup>-1</sup>, 9 Tg CH<sub>4</sub> yr<sup>-1</sup>, 5 Tg yr<sup>-1</sup>, and 3 Tg CH<sub>4</sub> yr<sup>-1</sup> respectively, much lower than the first estimates by Allan et al. (2007). The recent work of Wang et al. (2021b) is the most comprehensive modelling study and based upon Sherwen et al. (2016) and Wang et al. (2019b). Both the KIE approach and chemistry transport model simulations carry uncertainties (extrapolations based on only a few sites and use of indirect measurements, for the former and missing sources, coarse resolution, underestimation of some anthropogenic sources for the latter). However, Gromov et al. (2018) found that Cl can contribute only 0.23% the tropospheric sink of CH<sub>4</sub> (about 1 Tg CH<sub>4</sub> yr<sup>-1</sup>) in order to balance the global <sup>13</sup>C(CO) budget (see their Table S1). While tropospheric Cl has a marginal impact on the total CH<sub>4</sub> sink (few percents), it influences more significantly the atmospheric isotopic δ<sup>13</sup>C-CH<sub>4</sub> signal and improved estimates of the tropospheric Cl amount should be used for isotopic CH<sub>4</sub> modelling studies (Strode et al., 2020; Thanwerdas et al., 2022b). Each recent Cl estimate suggests a reduced contribution to the methane loss than previously reported by Allen et al. (2007). As a result, we suggest here to use the mean, minimum and maximum of the last five estimates published since 2016, leading to a climatological value of 6 [1-13] Tg CH<sub>4</sub> yr<sup>-1</sup>, thus reducing both the magnitude and the uncertainty range compared to Saunio et al. (2020).

Supprimé: 12-37

Supprimé: to

Supprimé: 31

Mis en forme : Police :Gras, Couleur de police : Noir

Mis en forme : Normal, Espace Avant : 12 pt, Après : 12 pt, Paragraphes solidaires, Bordure : Haut: (Pas de bordure), Bas: (Pas de bordure), Gauche: (Pas de bordure), Droite: (Pas de bordure), Entre : (Pas de bordure)

Supprimé: Halogen atoms can also contribute to the oxidation of methane in the troposphere. Allan et al. (2005) measured mixing ratios of methane and δ<sup>13</sup>C-CH<sub>4</sub> at two stations in the southern hemisphere from 1991 to 2003, and found that the apparent kinetic isotope effect (KIE) of the atmospheric methane sink was significantly larger than that explained by OH alone. A seasonally varying sink due to atomic chlorine (Cl) in the marine boundary layer of between 13 and 37 Tg CH<sub>4</sub> yr<sup>-1</sup> was proposed as the explanatory mechanism (Allan et al., 2007; Platt et al., 2004). This sink was estimated to occur mainly over coastal and marine regions, where NaCl from evaporated droplets of seawater react with NO<sub>2</sub> to eventually form Cl<sub>2</sub>, which then UV-dissociates to Cl. However significant production of nitryl chloride (ClNO<sub>2</sub>) at continental sites has been recently reported (Riedel et al., 2014) and suggests the broader presence of Cl, which in turn would expand the significance of the Cl sink in the troposphere. Recently, using a chemistry transport model, Hossaini et al. (2016) suggest a chlorine sink in the lower range of Allan et al. (2007), ~12-13 Tg CH<sub>4</sub> yr<sup>-1</sup> (about 2.5 % of the tropospheric sink). They also estimate that ClNO<sub>2</sub> yields a 1 Tg yr<sup>-1</sup> sink of methane. Another modelling study (Wang et al., 2019b) produced a more comprehensive analysis of global tropospheric chlorine chemistry and found a chlorine sink of 5 Tg yr<sup>-1</sup>, representing only 1% of the total methane tropospheric sink. Both the KIE approach and chemistry transport model simulations carry uncertainties (extrapolations based on only a few sites and use of indirect measurements, for the former; missing sources, coarse resolution, underestimation of some anthropogenic sources for the latter). However, Gromov et al. (2018) found that chlorine can contribute only 0.23% the tropospheric sink of methane (about 1 Tg CH<sub>4</sub> yr<sup>-1</sup>) in order to balance the global <sup>13</sup>C(CO) budget. Awaiting further work to better assess the magnitude of the chlorine sink in the methane budget, we suggest a lower estimate but a larger range than in Saunio et al. (2016) and used the following climatological value for the 2000s: 11 [1-35] Tg CH<sub>4</sub> yr<sup>-1</sup>.



### 3.3.4 Soil uptake

Unsaturated oxic soils are sinks of atmospheric CH<sub>4</sub> due to the presence of methanotrophic bacteria, which consume CH<sub>4</sub> as a source of energy. Dutaaur and Verchot (2007) conducted a comprehensive meta-analysis of field measurements of CH<sub>4</sub> uptake spanning a variety of ecosystems. Extrapolating to the global scale, they reported a range of  $36 \pm 23$  Tg CH<sub>4</sub> yr<sup>-1</sup>, but also showed that stratifying the results by climatic zone, ecosystem, and soil type led to a narrower range (and lower mean estimate) of  $22 \pm 12$  Tg CH<sub>4</sub> yr<sup>-1</sup>. Modelling studies, employing meteorological data as external forcing, have also produced a considerable range of estimates. Using a soil depth-averaged formulation based on Fick's law with parameterizations for diffusion and biological oxidation of CH<sub>4</sub>, Ridgwell et al. (1999) estimated the global sink strength at 38 Tg CH<sub>4</sub> yr<sup>-1</sup>, with a range 20-51 Tg CH<sub>4</sub> yr<sup>-1</sup> reflecting the model structural uncertainty in the base oxidation parameter. Curry (2007) improved on the latter by employing an exact solution of the one-dimensional diffusion-reaction equation in the near-surface soil layer (i.e., exponential decrease in CH<sub>4</sub> concentration below the surface), a land surface hydrology model, and calibration of the oxidation rate to field measurements. This resulted in a global estimate of 28 Tg CH<sub>4</sub> yr<sup>-1</sup> (9-47 Tg CH<sub>4</sub> yr<sup>-1</sup>), the result reported by Zhuang et al. (2013), Kirschke et al. (2013) and Saunois et al. (2016). Ito and Inatomi (2012) used an ensemble methodology to explore the variation in estimates produced by these parameterizations and others, which spanned the range 25-35 Tg CH<sub>4</sub> yr<sup>-1</sup>. For the period 2000-2020, as part of the wetland emissions modelling activity, JSBACH (Kleinen et al., 2020) and VISIT (Ito and Inatomi, 2012) models compute a global CH<sub>4</sub> soil uptake to 18 and 35 Tg CH<sub>4</sub> yr<sup>-1</sup>, respectively. Murguia-Flores et al. (2018) further refined the Curry (2007) model's structural and parametric representations of key drivers of soil methanotrophy, demonstrating good agreement with the observed latitudinal distribution of soil uptake (Dutaaur and Verchot, 2007). Their model (MeMo) simulates a CH<sub>4</sub> soil sink of 37.5 Tg CH<sub>4</sub> yr<sup>-1</sup> for the period 2010-2019 (Fig. S4), compared to 39.5 and 31.3 Tg CH<sub>4</sub> yr<sup>-1</sup> using the Ridgwell et al. (1999) and Curry (2007) parameterizations, respectively, under the same meteorological forcing, run specifically for this study. For the 2000s period, the simulations estimate the soil uptake at 30.4, 36.7 and 38.3 Tg CH<sub>4</sub> yr<sup>-1</sup> based on the parameterization of Curry, MeMo, and Ridgwell, respectively. As part of a more comprehensive model accounting for a range of CH<sub>4</sub> sources and sinks, Tian et al. (2010, 2015, 2016) computed vertically-averaged CH<sub>4</sub> soil uptake including the additional mechanisms of aqueous diffusion and plant-mediated (*aerenchyma*) transport, arriving at the estimate 30±19 Tg CH<sub>4</sub> yr<sup>-1</sup> (Tian et al., 2016) for the 2000s. The still more comprehensive biogeochemical model of Riley et al. (2011) included vertically resolved representations of the same processes considered by Tian et al. (2016), in addition to grid cell fractional inundation and, importantly, the joint limitation of uptake by both CH<sub>4</sub> and O<sub>2</sub> availability in the soil column. Riley et al. (2011) estimated a global CH<sub>4</sub> soil sink of 31 Tg CH<sub>4</sub> yr<sup>-1</sup> with a structural uncertainty of 15-38 Tg CH<sub>4</sub> yr<sup>-1</sup> (a higher upper limit resulted from an elevated gas diffusivity to mimic convective transport; as this is not usually considered, we adopt the lower upper bound associated with no limitation of uptake at low soil moisture). A model of this degree of complexity is required to explicitly simulate situations where the soil water content increases enough to inhibit the diffusion of oxygen, and the soil becomes a methane source

**Mis en forme :** Police :Gras, Couleur de police : Noir

**Mis en forme :** Normal, Espace Avant : 12 pt, Après : 12 pt, Paragraphes solidaires, Bordure : Haut: (Pas de bordure), Bas: (Pas de bordure), Gauche: (Pas de bordure), Droite: (Pas de bordure), Entre : (Pas de bordure)

**Supprimé :** Unsaturated oxic soils are sinks of atmospheric methane due to the presence of methanotrophic bacteria, which consume methane as a source of energy. Dutaaur and Verchot (2007) conducted a comprehensive meta-analysis of field measurements of CH<sub>4</sub> uptake spanning a variety of ecosystems. Extrapolating to the global scale, they reported a range of  $36 \pm 23$  Tg CH<sub>4</sub> yr<sup>-1</sup>, but also showed that stratifying the results by climatic zone, ecosystem and soil type led to a narrower range (and lower mean estimate) of  $22 \pm 12$  Tg CH<sub>4</sub> yr<sup>-1</sup>. Modelling studies, employing meteorological data as external forcing, have also produced a considerable range of estimates. Using a soil depth-averaged formulation based on Fick's law with parameterizations for diffusion and biological oxidation of CH<sub>4</sub>, Ridgwell et al. (1999) estimated the global sink strength at 38 Tg CH<sub>4</sub> yr<sup>-1</sup>, with a range 20-51 Tg CH<sub>4</sub> yr<sup>-1</sup> reflecting the model structural uncertainty in the base oxidation parameter. Curry (2007) improved on the latter by employing an exact solution of the one-dimensional diffusion-reaction equation in the near-surface soil layer (i.e., exponential decrease in CH<sub>4</sub> concentration below the surface), a land surface hydrology model, and calibration of the oxidation rate to field measurements. This resulted in a global estimate of 28 Tg CH<sub>4</sub> yr<sup>-1</sup> (9-47 Tg CH<sub>4</sub> yr<sup>-1</sup>), the result reported by Zhuang et al. (2013), Kirschke et al. (2013) and Saunois et al. (2016). Ito and Inatomi (2012) used an ensemble methodology to explore the variation in estimates produced by these parameterizations and others, which spanned the range 25-35 Tg CH<sub>4</sub> yr<sup>-1</sup>. Murguia-Flores et al. (2018) further refined the Curry (2007) model's structural and parametric representations of key drivers of soil methanotrophy, demonstrating good agreement with the observed latitudinal distribution of soil uptake (Dutaaur and Verchot, 2007). Their model simulated a methane soil sink of 32 Tg CH<sub>4</sub> yr<sup>-1</sup> for the period 2000-2017 (Fig. 4), compared to 38 and 29 Tg CH<sub>4</sub> yr<sup>-1</sup> using the Ridgwell et al. (1999) and Curry (2007) parameterizations, respectively, under the same meteorological forcing. As part of a more comprehensive model accounting for a range of methane sources and sinks, Tian et al. (2010, 2015, 2016) computed vertically-averaged CH<sub>4</sub> soil uptake including the additional mechanisms of aqueous diffusion and plant-mediated (*aerenchyma*) transport, arriving at the estimate 30±19 Tg CH<sub>4</sub> yr<sup>-1</sup> (Tian et al., 2016). The still more comprehensive biogeochemical model of Riley et al. (2011) included vertically resolved representations of the same processes considered by Tian et al. (2016), in addition to grid cell fractional inundation and, importantly, the joint limitation of uptake by both CH<sub>4</sub> and O<sub>2</sub> availability in the soil column. Riley et al. (2011) estimated a global CH<sub>4</sub> soil sink of 31 Tg CH<sub>4</sub> yr<sup>-1</sup> with a structural uncertainty of 15-38 Tg CH<sub>4</sub> yr<sup>-1</sup> (a higher upper limit resulted from an elevated gas diffusivity to mimic convective transport; as this is not usually considered, we adopt the lower upper bound associated with no limitation of uptake at low soil moisture). A model of this degree of complexity is required to explicitly simulate situations where the soil water content increases enough to inhibit the diffusion of oxygen, and the soil becomes a methane source (Lohila et al., 2016). This transition can be rapid, thus creating areas (for example, seasonal wetlands) that can be either a source or a sink of methane depending on the season. <sup>†</sup> The previous Curry (2007) estimate can be revised upward based on subsequent work and the increase in CH<sub>4</sub> concentration since 1940.

(Lohila et al., 2016). This transition can be rapid, thus creating areas (for example, seasonal wetlands) that can be either a source or a sink of methane depending on the season. The previous Curry (2007) estimate can be revised upward slightly based on subsequent work and the increase in CH<sub>4</sub> concentration since that time. Considering the latest estimates (based on VISIT, JSBACH, and Memo models, Table S6 in the supplementary) we report here a mean estimate of 31 [17-39] Tg CH<sub>4</sub> yr<sup>-1</sup> for 2000-2009 and 32 [18-40] for 2010-2019 Tg CH<sub>4</sub> yr<sup>-1</sup>.

### 3.3.5 CH<sub>4</sub> lifetime

The atmospheric lifetime of a given gas in steady state may be defined as the global atmospheric burden (Tg) divided by the total sink (Tg yr<sup>-1</sup>) (IPCC, 2001). Global models provide an estimate of the loss of the gas due to individual sinks, which can then be used to derive lifetime due to a specific sink. For example, the tropospheric lifetime of CH<sub>4</sub> is determined as the global atmospheric CH<sub>4</sub> burden divided by the loss from OH oxidation in the troposphere, sometimes called “chemical lifetime”. The total lifetime of CH<sub>4</sub> corresponds to the global burden divided by the total loss including tropospheric loss from OH oxidation, stratospheric chemistry and soil uptake. The CCMI (Plummer et al., 2021) and CMIP6 (Collins et al., 2021) runs estimate the tropospheric methane lifetime at about 9.2 years (average over years 2000-2009), with a range of 7.5-11 years (see Table S5). This range agrees with previous values found in ACCMIP and CCMI (9.3 [7.1-10.6] years, Voulgarakis et al. (2013), 9 [7.2-10.1] years, Saunio et al. (2020)). Adding 31 Tg to account for the soil uptake to the total chemical loss of the CMIP6 and CCMI models, we derive a total CH<sub>4</sub> lifetime of 8.2 years (average over 2000-2009 with a range of 6.8-9.7 years). The lifetime calculated over 2010-2019 based on CMIP6 simulations is similar (Table S5). These updated model estimates of total CH<sub>4</sub> lifetime agree with the previous estimates from ACCMIP (8.2 [6.4-9.2] years for year 2000, Voulgarakis et al. (2013)) and Saunio et al. (2020) based CCMI models. Reducing the large spread in CH<sub>4</sub> lifetime (between models, and between models and observation-based estimates) would 1) bring an improved constraint on global total methane emissions, and 2) ensure an accurate forecast of future climate.

## 4 Atmospheric observations and top-down inversions

### 4.1 Atmospheric observations

Systematic atmospheric CH<sub>4</sub> observations began in 1978 (Blake et al., 1982) with infrequent measurements from discrete air samples collected in the Pacific at a range of latitudes from 67°N to 53°S. Because most of these air samples were from well-mixed oceanic air masses and the measurement technique was precise and accurate, they were sufficient to establish an increasing trend and the first indication of the latitudinal gradient of methane. Spatial and temporal coverage was greatly improved soon after (Blake and Rowland, 1986) with the addition of the Earth System Research Laboratory from US National Oceanic and Atmospheric Administration (NOAA/GML) flask network (Steele et al. (1987); Lan et al. (2024), Fig.

**Mis en forme :** Police :Gras, Couleur de police : Noir

**Mis en forme :** Normal, Espace Avant : 12 pt, Après : 12 pt, Paragraphes solidaires, Bordure : Haut: (Pas de bordure), Bas: (Pas de bordure), Gauche: (Pas de bordure), Droite: (Pas de bordure), Entre : (Pas de bordure)

**Supprimé :** The atmospheric lifetime of a given gas in steady state may be defined as the global atmospheric burden (Tg) divided by the total sink (Tg/yr) (IPCC, 2001). Global models provide an estimate of the loss of the gas due to individual sinks, which can then be used to derive lifetime due to a specific sink. For example, methane's tropospheric lifetime is determined as global atmospheric methane burden divided by the loss from OH oxidation in the troposphere, sometimes called “chemical lifetime”. Methane total lifetime corresponds to the global burden divided by the total loss including tropospheric loss from OH oxidation, stratospheric chemistry and soil uptake. The CCMI models (described in Morgenstein et al. (2017)) estimate the tropospheric methane lifetime at about 9 years (average over years 2000-2009), with a range of 7.2-10.1 years (see Table S4). While this range agrees with previous values found in ACCMIP (9.3 [7.1-10.6] years, Voulgarakis et al. (2013)), the mean value reported here is lower than previously reported, probably due to a smaller and different ensemble of climate models. Adding 30 Tg to account for the soil uptake to the total chemical loss of the CCMI models, we derive a total methane lifetime of 7.8 years (average over 2000-2009 with a range of 6.5-8.8 years). These updated model estimates of total methane lifetime agree with the previous estimates from ACCMIP (8.2 [6.4-9.2] years for year 2000, Voulgarakis et al. (2013)). Reducing the large spread in methane lifetime (between models, and between models and observation-based estimates) would 1) bring an improved constraint on global total methane emissions, and 2) ensure an accurate forecast of future climate.

### 4 Atmospheric observations and top-down inversions

#### 4.1 Atmospheric observations

Systematic atmospheric CH<sub>4</sub> observations began in 1978 (Blake et al., 1982) with infrequent measurements from discrete air samples collected in the Pacific at a range of latitudes from 67°N to 53°S. Because most of these air samples were from well-mixed oceanic air masses and the measurement technique was precise and accurate, they were sufficient to establish an increasing trend and the first indication of the latitudinal gradient of methane. Spatial and temporal coverage was greatly improved soon after (Blake and Rowland, 1986) with the addition of the Earth System Research Laboratory from US National Oceanic and Atmospheric Administration (NOAA/ESRL) flask network (Steele et al. (1987), Fig. 1), and of the Advanced Global Atmospheric Gases Experiment (AGAGE) (Cunnold et al., 2002; Prinn et al., 2000), the Commonwealth Scientific and Industrial Research Organisation (CSIRO, Francey et al. (1999)), the University of California Irvine (UCI, Simpson et al. (2012)) and in situ and flask measurements from regional networks, such as ICOS (Integrated Carbon Observation System) network in Europe (<https://www.icos-ri.eu/>). The combined datasets provide the longest time series of globally averaged CH<sub>4</sub> abundance. Since the early-2000s, CH<sub>4</sub> column-averaged mole fractions have been retrieved through passive remote sensing from space (Buchwitz et al., 2005a, 2005b; Butz et al., 2011; Crevoisier et al., 2009; Frankenberg et al., 2005; Hu et al., 2018). Ground-based Fourier transform infrared (FTIR) measurements at fixed locations also provide time-resolved methane column observations during daylight hours, and a validation dataset against which to evaluate the satellite measurements such as TCCON network (e.g. Pollard et al., 2011, 2014).

1), and the Advanced Global Atmospheric Gases Experiment (AGAGE) (Cunnold et al., 2002; Prinn et al., 2018), the Commonwealth Scientific and Industrial Research Organisation (CSIRO, Francey et al. (1999)), the University of California Irvine (UCI, Simpson et al., 2012) and in situ and flask measurements from regional networks, such as ICOS (Integrated Carbon Observation System) in Europe (<https://www.icos-ri.eu/>). The combined datasets provide the longest time series of globally averaged CH<sub>4</sub> abundances. Since the early-2000s, CH<sub>4</sub> column-averaged mole fractions have been retrieved through passive remote sensing from space (Buchwitz et al., 2005a, 2005b; Butz et al., 2011; Crevoisier et al., 2009; Frankenberg et al., 2005; Hu et al., 2018). Ground-based Fourier transform infrared (FTIR) measurements at fixed locations also provide time-resolved CH<sub>4</sub> column observations during daylight hours, and a validation dataset against which to evaluate the satellite measurements such as the Total Carbon Column Observing Network (TCCON) network (e.g., Pollard et al., 2017; Wunch et al., 2011), or Network for Detection of Atmospheric Composition Change (NDACC) (e.g., Bader et al., 2017). In this budget, in-situ observations from the different networks were used in the top-down atmospheric inversions to estimate CH<sub>4</sub> sources and sinks over the period 2000-2020. Satellite observations from the TANSO/FTS instrument on board the satellite GOSAT were used to estimate CH<sub>4</sub> sources and sinks over the period 2010-2020. Other atmospheric data (FTIR, airborne measurements, AirCore, isotopic measurements, etc.) have been used for validation by some groups, but not specifically in this study. However, further information is provided in Tables S7, S8, S9, S10, and S11 and a more comprehensive validation of the inversions is planned to use some of these data.

#### 4.1.1 In situ CH<sub>4</sub> observations and atmospheric growth rate at the surface

We use globally averaged CH<sub>4</sub> mole fractions at the Earth's surface from the four observational networks (NOAA/GML, AGAGE, CSIRO and UCI). The data are archived at the World Data Centre for Greenhouse Gases (WDCGG) of the WMO Global Atmospheric Watch (WMO-GAW) program (<https://gaw.kishou.go.jp/>), including measurements from other sites that are not operated as part of the four networks. The CH<sub>4</sub> in-situ monitoring network has grown significantly over the last decade due to the emergence of laser diode spectrometers which are robust and accurate enough to allow deployments with low maintenance enabling the development of denser networks in developed countries (Stanley et al., 2018; Yver Kwok et al., 2015), and new stations in remote environments (Bian et al., 2015; Nisbet et al., 2019). The networks differ in their sampling strategies, including the frequency of observations, spatial distribution, and methods of calculating globally averaged CH<sub>4</sub> mole fractions. Details are given in the supplementary material of Kirschke et al. (2013). The global average values of CH<sub>4</sub> abundances at Earth's surface presented in Fig. 1 are computed using long-term measurements from background conditions with minimal influence from immediate emissions. All measurements are calibrated against gas standards either on the current WMO reference scale or on independent scales with well-estimate differences from the WMO scale. The current WMO reference scale, maintained by NOAA/ESRL, WMO-X2004A (Dlugokencky et al., 2005) was updated in July 2015. NOAA and CSIRO global means are on this scale. AGAGE uses an independent standard scale (based on work by Tohoku University (Aoki et al., 1992) and maintained at Scripps Institution

**Supprimé:** methane

**Supprimé:** 2017

**Supprimé:** methane

**Supprimé:** 2009-2017

**Supprimé:** ...)

**Supprimé:** the Supplementary Material

**Mis en forme :** Police :Gras, Couleur de police : Noir

**Mis en forme :** Normal, Espace Avant : 12 pt, Après : 12 pt, Paragraphes solidaires, Bordure : Haut: (Pas de bordure), Bas: (Pas de bordure), Gauche: (Pas de bordure), Droite: (Pas de bordure), Entre : (Pas de bordure)

**Supprimé:** ESRL, AGAGE, CSIRO and UCI). The data are archived at the World Data Centre for Greenhouse Gases (WDCGG) of the WMO Global Atmospheric Watch (WMO-GAW) program, including measurements from other sites that are not operated as part of the four networks. The CH<sub>4</sub> in-situ monitoring network has grown significantly over the last decade due to the emergence of laser diode spectrometers which are robust and accurate enough to allow deployments with minimal maintenance enabling the development of denser networks in developed countries (Stanley et al., 2018; Yver Kwok et al., 2015), and new stations in remote environment (Bian et al., 2015; Nisbet et al., 2019).

**Mis en forme :** Anglais (G.B.)

**Supprimé:** The networks differ in their sampling strategies, including the frequency of observations, spatial distribution, and methods of calculating globally averaged CH<sub>4</sub> mole fractions. Details are given in the supplementary material of Kirschke et al. (2013). The global average values of CH<sub>4</sub> concentrations presented in Fig. 1 are computed using long-time series measurements through gas chromatography with flame ionization detection (GC/FID), although chromatographic schemes vary among the labs. Because GC/FID is a relative measurement method, the instrument response must be calibrated against standards. The current WMO reference scale, maintained by NOAA/ESRL, WMO-X2004A (Dlugokencky et al., 2005) was updated in July 2015. NOAA and CSIRO global means are on this scale. AGAGE uses an independent standard scale maintained by Tohoku University (Aoki et al., 1992), but direct comparisons of standards and indirect comparisons of atmospheric measurements show that differences are below 5 ppb (Tans and Zwellberg, 2014; Vardag et al., 2014). UCI uses another independent scale that was established in 1978 and is traceable to NIST (Flores et al., 2015; Simpson et al., 2012), but has not been included in standard exchanges with other networks so differences with the other networks cannot be quantitatively defined. Additional experimental details are presented in the supplementary material from Kirschke et al. (2013) and references therein.

of Oceanography (SIO)), but direct comparisons of standards and indirect comparisons of atmospheric measurements show that differences are well below 5 ppb (Tans and Zwellberg, 2014; Vardag et al., 2014) and the TU-1987 scale used for AGAGE measurements is only 0.5 ppb difference from WMO-X2004A at 1900 ppb level. UCI uses another independent scale that was established in 1978 and is traceable to NIST (Flores et al., 2015; Simpson et al., 2012), but has not been included in standard exchanges with other networks so differences with the other networks cannot be quantitatively defined. Additional experimental details are presented in the supplementary material from Kirschke et al. (2013) and references therein.

In Fig. 1, (a) globally averaged CH<sub>4</sub> and (b) its growth rate (derivative of the deseasonalized trend curve) through to 2022 are plotted for the four measurement programs using a procedure of signal decomposition described in Thoning et al. (1989). We define the annual G<sub>ATM</sub> as the increase in the atmospheric concentrations from Jan. 1 in one year to Jan. 1 in the next year. Agreement among the four networks is good for the global growth rate, especially since ~1990. The large differences observed mainly before 1990 probably reflect the different spatial coverage of each network. The long-term behaviour of globally averaged atmospheric CH<sub>4</sub> shows a positive growth rate (defined as the derivative of the deseasonalized mixing ratio) that is slowing down from the early-1980s through 1998, a near-stabilisation of CH<sub>4</sub> concentrations from 1999 to 2006, and a renewed period with positive persistent overall accelerating growth rates since 2007, slightly larger after 2014. When a constant atmospheric lifetime is assumed, the decreasing growth rate from 1983 through 2006 may imply that atmospheric CH<sub>4</sub> was approaching steady state, leading to no trend in emissions. The NOAA global mean CH<sub>4</sub> concentration was fitted with a function that describes the approach to a first-order steady state (ss index):  $[CH_4](t) = [CH_4]_{ss} - ([CH_4]_{ss} - [CH_4]_0)e^{-t/\tau}$ ; solving for the lifetime,  $\tau$ , gives 9.3 years, which is very close to current literature values (e.g., Prather et al. (2012),  $9.1 \pm 0.9$  years). Such an approach includes uncertainties, especially due to the strong assumption of no trend in lifetime. The result of constant emissions does not agree with some study explaining the stabilisation period by decreasing emissions associated with increasing sink (e.g., Bousquet et al., 2006). However, this value seems consistent albeit higher than the chemistry climate estimates (8.2 years, see Sect. 3.3.5).

From 1999 to 2006, the annual increase of atmospheric CH<sub>4</sub> was remarkably small at  $0.6 \pm 0.1$  ppb yr<sup>-1</sup>. After 2006, the atmospheric growth rate has increased to a level similar to that of the mid-1990s (~5 ppb yr<sup>-1</sup>), and for 2014 and 2015 even to that of the 1980s (>10 ppb yr<sup>-1</sup>). In the two recent years 2020 and 2021, the highest growth rates of 15 ppb yr<sup>-1</sup> and 18 ppb yr<sup>-1</sup> (see Sect. 6) were unprecedented since the 1980s. On decadal timescales, the annual increase is on average  $2.2 \pm 0.3$  ppb yr<sup>-1</sup> for 2000-2009,  $2.6 \pm 0.3$  ppb yr<sup>-1</sup> for 2010-2019 and  $15.2 \pm 0.4$  ppb yr<sup>-1</sup> for the year 2020.

#### 4.1.2 Satellite data of column average CH<sub>4</sub>

In this budget, we use satellite data from the JAXA satellite Greenhouse Gases Observing SATellite (GOSAT) launched in January 2009 (Butz et al., 2011; Morino et al., 2011) containing the TANSO-FTS instrument, which observes in the shortwave infrared (SWIR). Different retrievals of CH<sub>4</sub> based on TANSO-FTS/GOSAT products are made available to the

Supprimé :

Supprimé: 2017

Supprimé: Thoning et al. (1989).

Supprimé: probably

Supprimé: decreasing but

Supprimé: stabilization

Supprimé: with

Supprimé: . Prather et al. (2012),  $9.1 \pm 0.9$  years).

Supprimé: and sinks, which

Supprimé: stabilization

Supprimé: to increasing sink (e.g. Bousquet et al., 2006).

Mis en forme : Anglais (G.B.)

Supprimé: recovered

Supprimé: or

Supprimé: for 2014 and 2015

Supprimé: 1

Supprimé: 6

Supprimé: 2008-2017

Supprimé:  $6.1 \pm 1$ .

Supprimé: 2017

Mis en forme : Police :Gras, Couleur de police : Noir

Mis en forme : Normal, Espace Avant : 12 pt, Après : 12 pt, Paragraphes solidaires, Bordure : Haut: (Pas de bordure), Bas: (Pas de bordure), Gauche: (Pas de bordure), Droite: (Pas de bordure), Entre : (Pas de bordure)

Mis en forme : Couleur de police : Noir

Supprimé: In this budget, we use satellite data from the JAXA satellite Greenhouse Gases Observing SATellite (GOSAT) launched in January 2009 (Butz et al., 2011; Morino et al., 2011) containing the TANSO-FTS instrument, which observes in the shortwave infrared (SWIR). Different retrievals of methane based on TANSO-FTS/GOSAT products are made available to the community: from NIES (Yoshida et al., 2013), from SRON (Schepers et al., 2012) and from University of Leicester (Parker et al., 2011). The three retrievals are used by the top-down systems (Table 4 and S6). Although GOSAT retrievals still show significant unexplained biases and limited sampling in cloud covered regions and in the high latitude winter, it represents an important improvement compared to the first satellite measuring methane from space, SCIAMACHY (Scanning Imaging Absorption spectrometer for Atmospheric Cartography) both for random and systematic observation errors (see Table S2 of Buchwitz et al. (2016)).<sup>†</sup> Atmospheric inversions based on SCIAMACHY and GOSAT CH<sub>4</sub> retrievals were reported in Saunio et al. (2016). Here, only inversions using GOSAT retrievals are used.

community: from NIES (Yoshida et al., 2013), from SRON (Schepers et al., 2012) and from University of Leicester (Parker et al., 2020; Parker and Boesch, 2020). The three retrievals are used by the top-down systems (Table 4 and S6). Although GOSAT retrievals still show significant unexplained biases and limited sampling in cloud covered regions and in the high latitude winter, it represents an important improvement compared to the first satellite measuring CH<sub>4</sub> from space, SCIAMACHY (Scanning Imaging Absorption spectrometer for Atmospheric Cartography) both for random and systematic observation errors (see Table S2 of Buchwitz et al. (2016)). Here, as in Saunois et al. (2020), only inversions using GOSAT retrievals are used.

#### 4.2 Top-down inversions used in the budget

An atmospheric inversion is the optimal combination of atmospheric observations, of a model of atmospheric transport and chemistry, of a prior estimate of CH<sub>4</sub> sources and sinks, and of their uncertainties, to provide improved estimates of the sources and sinks, and their uncertainty. The theoretical principle of CH<sub>4</sub> inversions is detailed in the Supplementary Material and an overview of the different methods applied to CH<sub>4</sub> is presented in Houweling et al. (2017).

We consider an ensemble of inversions gathering various chemistry transport models, differing in vertical and horizontal resolutions, meteorological forcing, advection and convection schemes, and boundary layer mixing. Including these different systems is a conservative approach that allows us to cover different potential uncertainties of the inversion, among them: model transport, set-up issues, and prior dependency. General characteristics of the inversion systems are provided in Table 4. Further details can be found in the referenced papers and in the Supplementary Material. Each group was asked to provide gridded flux estimates for the period 2000-2020, using either surface or satellite data, but no additional constraints were imposed so that each group could use their preferred inversion setup. Two sets of prior emission distributions were built from the most recent inventories or model-based estimates (see Supplementary Material), but its use was not mandatory (see Table S8 to S11 for the inversion characteristics). This approach corresponds to a flux assessment, but not to a model inter-comparison as the protocol was not too stringent. Estimating posterior uncertainty is time and computer resource consuming, especially for the 4D-var approaches and Monte Carlo methods. Posterior uncertainties have not been requested for this study, but they were found to be lower than the ensemble spread in Saunois et al. (2020). Indeed, chemistry transport models differ in inter-hemispheric transport, stratospheric CH<sub>4</sub> profiles, and OH distribution, limitations which are not fully considered in the individual posterior uncertainty. As a result, we report the minimum-maximum range among the different top-down approaches.

Seven atmospheric inversion systems using global Eulerian transport models were used in this study; they contributed to the previous budgets that included eight atmospheric inversion systems in Saunois et al. (2016) and nine in Saunois et al. (2020). Each inversion system provided one or several simulations, including sensitivity tests varying the assimilated observations (surface or satellite), the OH inter-annual variability, or the prior fluxes ensemble. This represents a total of 24 inversion runs with different time coverage: generally, 2000-2020 for surface-based observations, and 2010-2020 for GOSAT-based

**Mis en forme :** Police :Gras, Couleur de police : Noir

**Mis en forme :** Police :Gras, Couleur de police : Noir

**Mis en forme :** Normal, Espace Avant : 12 pt, Après : 12 pt, Paragraphes solidaires, Bordure : Haut: (Pas de bordure), Bas: (Pas de bordure), Gauche: (Pas de bordure), Droite: (Pas de bordure), Entre : (Pas de bordure)

**Supprimé :** An atmospheric inversion is the optimal combination of atmospheric observations, of a model of atmospheric transport and chemistry, of a prior estimate of methane sources and sinks, and of their uncertainties, in order to provide improved estimates of the sources and sinks, and their uncertainty. The theoretical principle of methane inversions is detailed in the Supplementary Material (ST2) and an overview of the different methods applied to methane is presented in Houweling et al. (2017).<sup>†</sup>

**Supprimé :** here

**Mis en forme :** Anglais (G.B.)

**Mis en forme :** Anglais (G.B.)

**Supprimé :** 2017

**Supprimé :** A set

**Supprimé :** was

**Supprimé :** S6

**Supprimé :** provided by only two groups and are

**Supprimé :** .

**Supprimé :** methane

**Supprimé :** which

**Supprimé :** do not use the posterior uncertainties provided by these two groups but

**Mis en forme :** Anglais (G.B.)

**Supprimé :** Nine atmospheric inversion systems using global Eulerian transport models were used in this study compared to eight in Saunois et al. (2016). Each inversion system provided one or several simulations, including sensitivity tests varying the assimilated observations (surface or satellite) or the inversion setup. This represents a total of 22 inversion runs with different time coverage: generally, 2000-2017 for surface-based observations, and 2010-2017 for GOSAT-based inversions (Table 4 and Table S6). In poorly observed regions, top-down surface inversions may rely on the prior estimates and bring little or no additional information to constrain (often) spatially overlapping emissions (e.g. in India, China). Also, we recall that many top-down systems solve for the total fluxes at the surface only or for some categories that may differ from the GCP categories. When multiple sensitivity tests were performed the mean of this ensemble was used not to overweight one particular inverse system. It should also be noticed that some satellite-based inversions are in fact combined satellite and surface inversions as they use satellite retrievals and surface measurements simultaneously (Alexe et al., 2015; Bergamaschi et al., 2013; Houweling et al., 2014). Nevertheless, these inversions are still referred to as satellite-based inversions.<sup>†</sup>

Each group provided gridded monthly maps of emissions for both their prior and posterior total and for sources per category (see the



inversions (Table 4 and Table S7). In poorly observed regions, top-down surface inversions may rely on the prior estimates and bring little or no additional information to constrain (often) spatially overlapping emissions (e.g., in India, China). Also, we recall that many top-down systems solve for the total fluxes at the surface only or for some categories that may differ from the GCP categories. When multiple sensitivity tests were performed the mean of this ensemble was used not to overweight one particular inverse system. It should also be noticed that some satellite-based inversions are in fact combined satellite and surface inversions as they use surface-based inversions to correct the latitudinal bias of the satellite retrievals against the optimised atmosphere measurements to correct for errors in the transport model especially in the stratosphere (e.g., Segers et al., 2022; Maasakkers et al., 2019). Nevertheless, these inversions are still referred to as satellite-based inversions. Most of the top-down models use the OH distribution from the TRANSCOM experiment (Patra et al., 2011) either as fixed over the period or with the inter-annual variability derived by Patra et al. (2021). Each group provided gridded monthly maps of emissions for both their prior and posterior total and for sources per category (see the categories Sect. 2.3). Results are reported in Sect. 5. Atmospheric sinks from the top-down approaches have been provided for this budget, and are compared with the values reported in Saunio et al. (2020). Not all inverse systems report their chemical sink; as a result, the global mass imbalance for the top-down budget is derived as the difference between total sources and total sinks for each model when both fluxes were reported.

## 5 Methane budget: top-down and bottom-up comparison

### 5.1 Global methane budget

#### 5.1.1 Global total methane emissions-

**Top-down estimates.** At the global scale, the total annual emissions inferred by the ensemble of 24 inversions is 575 Tg CH<sub>4</sub> yr<sup>-1</sup> [553-586] for the 2010-2019 decade (Table 3), with the highest ensemble mean emission of 608 Tg CH<sub>4</sub> yr<sup>-1</sup> [581-627] for 2020. Global emissions for 2000-2009 (543 Tg CH<sub>4</sub> yr<sup>-1</sup>) are consistent with Saunio et al. (2016, 2020) and the range for global emissions, 526-558 Tg CH<sub>4</sub> yr<sup>-1</sup> falls within the range in Saunio et al. (2016) (535-569) and Saunio et al. (2020) (524-560), although the ensemble of inverse systems contributing to this budget is different from Saunio et al. (2016, 2020). Changes in ensemble members contributing to the different budgets are a feature of each new GMB release and, therefore, introduce a source of variation (Table S7). The range reported gives the minimum and maximum values among studies and does not reflect the individual full uncertainties. In addition, most of the top-down models use the same OH distribution from the TRANSCOM experiment (Patra et al., 2011), which introduces less variability to the global budget than is likely justified, and so contributes to the rather low range (10%) compared to bottom-up estimates (see below).

**Bottom-up estimates.** The bottom-up estimates considered here differ substantially from the top-down results, with annual global emissions being about 15% larger at 669 Tg CH<sub>4</sub> yr<sup>-1</sup> [512-849] for 2010-2019 (Table 3). Yet, thanks to the double counting corrections in this budget, bottom-up and top-down budgets are in better agreement compared to previous GMB



releases. For the period 2000-2009, the discrepancy between bottom-up and top-down was about 30% of the top-down estimates in Saunois et al. (2016, 2020) (167 and 156 Tg CH<sub>4</sub> yr<sup>-1</sup>, respectively), a value that has been reduced significantly in this budget (now 95 Tg CH<sub>4</sub> yr<sup>-1</sup> (<17%) for the same 2000-2009 period). This reduction is due to improvements from an important decrease in the estimate of emissions from natural and indirect anthropogenic emissions from bottom-up approaches, and more specifically inland freshwater emissions. From the previous budget, the estimate for inland freshwater emissions (lakes, ponds, reservoirs, rivers, and streams) has decreased from 159 Tg CH<sub>4</sub> yr<sup>-1</sup> to 112 Tg CH<sub>4</sub> yr<sup>-1</sup> (47 Tg decrease). Then, 23 Tg have been removed in the total freshwater ecosystem emissions due to double counting between vegetated wetlands and mostly small ponds and lakes (Sect. 3.2.2). As a result the combined wetland and inland freshwater emissions are estimated to be 242 Tg CH<sub>4</sub> yr<sup>-1</sup> for 2000-2009, compared with 306 Tg CH<sub>4</sub> yr<sup>-1</sup> in Saunois et al. (2020). This budget is the first that reconciles bottom-up and top-down total emissions within the uncertainty ranges. However, the uncertainty in the global budget remains high because of the large range reported for emissions from freshwater systems. Still, the upper bound of global emissions from bottom-up approaches is not consistent with top-down estimates that rely on OH burden constrained by methyl chloroform atmospheric observations and is still likely overestimated.

#### 5.1.2 Global methane emissions per source category

The global CH<sub>4</sub> emissions from natural and anthropogenic sources (see Sect. 2.3) for 2010-2019 are presented in Fig. 6, Fig. 7, and Table 3. Top-down estimates attribute about 65% of total emissions to anthropogenic activities (range of 55-70%), and 35% to natural emissions. Bottom-up estimates attribute 57% of emissions to direct anthropogenic and the rest to natural plus indirect anthropogenic emissions. A current predominant role of direct anthropogenic sources of CH<sub>4</sub> emissions is consistent with and strongly supported by available ice core and atmospheric CH<sub>4</sub> records. These data indicate that atmospheric CH<sub>4</sub> varied around 700 ppb during the last millennium before increasing by a factor of 2.6 to ~1800 ppb since pre-industrial times. Accounting for the decrease in mean-lifetime over the industrial period, Prather et al. (2012) estimated from these data a total source of 554±56 Tg CH<sub>4</sub> in 2010 of which about 64% (352±45 Tg CH<sub>4</sub>) was of direct anthropogenic origin, consistent with the range in our stop-down estimates.

**Natural and indirect anthropogenic emissions.** Although smaller than in previous Global Methane Budget releases, the main remaining discrepancy between top-down and bottom-up budgets is found for the natural and indirect anthropogenic emission total (105 Tg), with 311 [183-462] Tg CH<sub>4</sub> yr<sup>-1</sup> for bottom-up and only 206 [188-225] Tg CH<sub>4</sub> yr<sup>-1</sup> for top-down over the 2010-2019 decade. In the bottom-up estimates, this discrepancy comes first from the estimates in both inland freshwater sources (64 Tg) and second from other natural sources (20 Tg from geological sources, termites, oceans, and permafrost). The top-down approaches may be biased due to missing fluxes (mainly inland freshwaters) in their prior estimates.

**Supprimé:** 547 Tg CH<sub>4</sub> yr<sup>-1</sup> are consistent with Saunois et al. (2016) and the range for global emissions, 524-560 Tg CH<sub>4</sub> yr<sup>-1</sup> is in line with range in Saunois et al. (2016) (535-569), although the ensemble of inverse systems contributing to this budget is different than for Saunois et al. (2016). Indeed, only six inverse systems of the nine examined here (Table S7) contributed previously to the Saunois et al. (2016) budget. The range reported gives the minimum and maximum values among studies and do not reflect the individual full uncertainties. Also, most of the top-down models use the same OH distribution from the TRANSCOM experiment (Patra et al., 2011), leading to a global budget quite constrained, probably explaining the rather low range (10 %) compared to bottom-up estimates (see below).

#### Déplacé vers le bas [2]: Bottom-up estimates.

**Supprimé:** The estimates made via the bottom-up approaches considered here are quite different from the top-down results, with global emissions almost 30% larger, at 737 Tg CH<sub>4</sub> yr<sup>-1</sup> [594-881] for 2008-2017 (Table 3). Moreover, the range estimated using bottom up approaches does not overlap with that of the top-down estimates. The bottom-up estimates are given by the sum of individual anthropogenic and natural processes, without any constraint on the total. For the period 2000-2009, the discrepancy between bottom-up and top-down was 30% of the top-down estimates in Saunois et al. (2016) (167 Tg CH<sub>4</sub> yr<sup>-1</sup>); this has been reduced only slightly (now 156 Tg CH<sub>4</sub> yr<sup>-1</sup> for the same 2000-2009 period). This reduction is due to 1) a better agreement in the anthropogenic emissions (top-down and bottom-up difference reducing from 19 Tg CH<sub>4</sub> yr<sup>-1</sup> to 2 Tg CH<sub>4</sub> yr<sup>-1</sup>), 2) a reduction in the estimates of some natural sources other than wetlands based on recent literature (by 7 Tg CH<sub>4</sub> yr<sup>-1</sup> from geological sources, by 8 Tg CH<sub>4</sub> yr<sup>-1</sup> from wild animals, and by 107

**Mis en forme :** Police :Gras, Couleur de police : Noir

**Mis en forme** ... [106]

**Supprimé:** methane

**Supprimé:** 2008-2017

**Supprimé:** 5

**Supprimé:** 6

**Supprimé:** 60

**Supprimé:**

**Supprimé:** 40

**Supprimé:** As natural

**Supprimé:** estimated from bottom-up approaches are much larger, the

**Supprimé:** versus natural emission ratio is nearly 1, not consistent with ice core data

**Supprimé:** methane

**Supprimé:** methane

**Supprimé:** methane

**Supprimé:** (2012)

**Supprimé:** Wetlands. For 2008-2017, the top-down and bottom-up derived estimates of 181 Tg CH<sub>4</sub> yr<sup>-1</sup> (range 159-200) and 149 Tg CH<sub>4</sub> yr<sup>-1</sup> (range 124-181) are consistent with Saunois et al. (2016) and the range for global emissions, 524-560 Tg CH<sub>4</sub> yr<sup>-1</sup> is in line with range in Saunois et al. (2016) (535-569), although the ensemble of inverse systems contributing to this budget is different than for Saunois et al. (2016). Indeed, only six inverse systems of the nine examined here (Table S7) contributed previously to the Saunois et al. (2016) budget. The range reported gives the minimum and maximum values among studies and do not reflect the individual full uncertainties. Also, most of the top-down models use the same OH distribution from the TRANSCOM experiment (Patra et al., 2011), leading to a global budget quite constrained, probably explaining the rather low range (10 %) compared to bottom-up estimates (see below).

4487 For 2010-2019, the top-down and bottom-up derived estimates for wetlands emissions of 165 [145-214] Tg CH<sub>4</sub> yr<sup>-1</sup> and  
4488 159 [119-203] Tg CH<sub>4</sub> yr<sup>-1</sup>, respectively, are comparable within their range. Based on diagnostic wetland area values (see  
4489 notes in Table 3), bottom-up mean wetland emissions for the 2000-2009 period are smaller in this study than those of Sauniois  
4490 et al. (2016) but larger than in Sauniois et al. (2020). The changes in wetland emissions from bottom-up models may be  
4491 related to updates on the wetland extent data set (WAD2M), the use of two different meteorological forcings for this study  
4492 and a different set of models (see Sect. 3.2.1). Conversely, the current 2000-2009 mean top-down wetland estimates are  
4493 lower than those of Sauniois et al. (2016) and Sauniois et al. (2020) (Table 3). In the bottom-up estimates, the amplitude of  
4494 the range of emissions of 116-189 is roughly similar to Sauniois et al. (2016) (151-222) and Sauniois et al. (2020) (102-179)  
4495 for 2000-2009. Here, the larger range in bottom-up estimates of wetland emissions is due to the use of GSWP3-W5E5 and  
4496 greater sensibilities of some models to the climate parameters, as discussed in Sect. 3.2.1. Bottom-up and top-down estimates  
4497 for wetland emissions agree better in this study (~5 Tg yr<sup>-1</sup> for 2000-2009) than in Sauniois et al. (2016, 2020) (~17 Tg yr<sup>-1</sup>  
4498 and ~30 Tg yr<sup>-1</sup>, respectively). Natural emissions from inland freshwater systems were not included in the prior fluxes used  
4499 in the top-down approaches, due to unavailable or uncertain gridded products at the start of the modelling activity. However,  
4500 emissions from these inland freshwater systems may be implicitly included in the posterior estimates of the top-down  
4501 models, as these two sources are close and probably overlap at the rather coarse resolution of the top-down models. This is  
4502 the reason why the ‘wetland emissions’ in the top-down budget in fact correspond to the sum of combined wetland and  
4503 inland freshwaters emissions in the bottom-up budget. The double-counting of 23 Tg CH<sub>4</sub> reduces the bottom-up budget for  
4504 combined wetland and inland freshwaters from 271 Tg CH<sub>4</sub> yr<sup>-1</sup> to 248 Tg CH<sub>4</sub> yr<sup>-1</sup> (Sect. 3.2.2). Comparing the 2000-2009  
4505 decadal emissions from wetlands and inland freshwater ecosystems estimated by the bottom-up approaches across the last  
4506 three Global Methane Budgets shows an upward and then a downward revision with 305 (183+122) Tg CH<sub>4</sub> yr<sup>-1</sup>, 356  
4507 (147+209) Tg CH<sub>4</sub> yr<sup>-1</sup> and 248 (159+112-23) Tg CH<sub>4</sub> yr<sup>-1</sup> (respectively from Sauniois et al. (2016, 2020) and this work; the  
4508 sum in bracket corresponds to the sum of vegetated wetland emissions and inland water emissions estimated through the  
4509 different budgets). The combined wetland and inland freshwater emissions discrepancy between bottom-up and top-down  
4510 approaches amount to 105 Tg CH<sub>4</sub> yr<sup>-1</sup> for the 2010-2019 decade. From a top-down point of view, the sum of all the natural  
4511 sources is more robust than the partitioning between wetlands, inland waters, and other natural sources. Including all known  
4512 spatio-temporal distributions of natural emissions in top-down prior fluxes would be a step forward to consistently compare  
4513 natural versus anthropogenic total emissions between top-down and bottom-up approaches.  
4514 In the top-down budget, wetlands represent 28% on average of the total methane emissions but only 24% in the bottom-up  
4515 budget (because of higher total emissions inferred). Given the large uncertainties, neither bottom-up nor top-down  
4516 approaches included in this study point to significant changes in wetland emissions between the two decades 2000-2009 and  
4517 2010-2019 at the global scale.  
4518 For the 2010-2019 decade, top-down inversions infer “Other natural emissions” (Table 3) at 43 Tg CH<sub>4</sub> yr<sup>-1</sup> [40-46], whereas  
4519 the sum of the individual bottom-up emissions is 63 Tg CH<sub>4</sub> yr<sup>-1</sup> [24-93], contributing to a 20 Tg discrepancy between

bottom-up and top-down approaches. Atmospheric inversions infer the same amount over the decade 2000-2009 as over 2010-2019, which is almost half of the value reported in Saunio et al. (2016) (68 [21-130] Tg CH<sub>4</sub> yr<sup>-1</sup>). This reduction in magnitude and uncertainty is due to 1) a more consistent way of considering other natural emissions in the various inverse systems (same prior estimate as in this budget) and 2) a difference in the ensemble of top-down inversions reported here compared to previous releases. It is worth noting that, most of the top-down models include about the same ocean and onshore geological emissions and termite emissions in their prior scenarios. However, none include freshwater or permafrost emissions in their prior fluxes, and thus in their posterior estimates.

Geological emissions are associated with relatively large uncertainties, and marine seepage emissions are still widely debated (Thornton et al., 2020). However, summing up all bottom-up fossil-CH<sub>4</sub> related sources (including anthropogenic emissions) leads to a total of 165 Tg CH<sub>4</sub> yr<sup>-1</sup> [135-190] in 2010-2019, which is about 29% of the top-down global CH<sub>4</sub> emissions, and 25% of the bottom-up total global estimate. These results agree with the value inferred from <sup>14</sup>C atmospheric isotopic analyses of 30% contribution of fossil-CH<sub>4</sub> to global emissions (Etiope et al., 2008; Lassey et al., 2007b). This total fossil fuel emissions from bottom-up approaches agrees well with the <sup>13</sup>C-based estimate of Schwietzke et al. (2016) of 192 ± 32 Tg CH<sub>4</sub> yr<sup>-1</sup>. In the bottom-up budget, the larger total emissions (due to uncertainties in bottom-up estimates of natural emissions) leads to a lower fossil fuel contribution compared to Lassey et al. (2007b).

**Anthropogenic direct emissions.** Total anthropogenic direct emissions for the period 2010-2019 were assessed to be statistically consistent between top-down (369 Tg CH<sub>4</sub> yr<sup>-1</sup>, range 350-391) and bottom-up approaches (358 Tg CH<sub>4</sub> yr<sup>-1</sup>, range 329-387), albeit top-down approaches infer direct anthropogenic emissions larger by 11 Tg CH<sub>4</sub> yr<sup>-1</sup> on average compared to bottom-up approaches. The partitioning of anthropogenic direct emissions between agriculture and waste, fossil fuels extraction and use, and biomass and biofuel burning, also shows good consistency between top-down and bottom-up approaches, though top-down approaches still suggest less fossil fuel and more agriculture and waste emissions than bottom-up estimates (Table 3 and Fig. 6 and 7). For 2010-2019, agriculture and waste contributed an estimated 228 Tg CH<sub>4</sub> yr<sup>-1</sup> [213-242] in the top-down budget and 211 Tg CH<sub>4</sub> yr<sup>-1</sup> [195-231] in the bottom-up budget. Fossil fuel emissions contributed 115 Tg CH<sub>4</sub> yr<sup>-1</sup> [100-124] in the top-down budget and 120 Tg CH<sub>4</sub> yr<sup>-1</sup> [117-125] in the bottom-up budget. Biomass and biofuel burning contributed 27 Tg CH<sub>4</sub> yr<sup>-1</sup> [26-27] in the top-down budget and 28 Tg CH<sub>4</sub> yr<sup>-1</sup> [21-39] in the bottom-up budget. Biofuel CH<sub>4</sub> emissions rely on very few estimates currently (Wuebbles and Hayhoe, 2002). Although biofuel is a small source globally (~12 Tg CH<sub>4</sub> yr<sup>-1</sup>), more estimates are needed to allow a proper uncertainty assessment. Overall for top-down inversions the global fraction of total emissions for the different source categories is 40% for agriculture and waste, 20% for fossil fuels, and 5% for biomass and biofuel burning. With the exception of biofuel emissions, the uncertainty associated with global anthropogenic emissions appears to be smaller than that of natural sources but with an asymmetric uncertainty distribution (mean significantly different than median). The relative agreement between top-down and bottom-up approaches may indicate a limited capability of the inversion to separate emissions and a dependency to their prior fluxes; this agreement should therefore be treated with caution. Indeed, in poorly observed regions, top-down inversions rely on the

- Supprimé: 2008-2017
- Supprimé: 359
- Supprimé: 336-376
- Supprimé: 366
- Supprimé: 349-393).
- Supprimé: 5
- Supprimé: 6
- Supprimé: 2008-2017
- Supprimé: 217
- Supprimé: 207-240] for
- Supprimé: 206
- Supprimé: 191-223] for
- Supprimé: 111
- Supprimé: 81-131] for
- Supprimé: 128
- Supprimé: 113-154] for
- Supprimé: 30
- Supprimé: 22-36] for
- Supprimé: 29
- Supprimé: 25
- Supprimé: for
- Supprimé: methane
- Supprimé: (Wuebbles and Hayhoe, 2002).
- Supprimé: 38
- Supprimé: 19
- Supprimé: the
- Supprimé: the

4580 prior estimates and bring little or no additional information to constrain (often) spatially overlapping emissions (e.g., in  
4581 India, China). Also, as many top-down systems solve for the total fluxes at the surface or for some categories that may differ  
4582 from the GCP categories, their posterior partitioning relies on the prior ratio between categories that are prescribed using  
4583 bottom-up inventories.

### 4584 5.1.3 Global budget of total methane sinks

4585 **Top-down estimates.** The annual CH<sub>4</sub> chemical removal from the atmosphere is estimated to be 521 Tg CH<sub>4</sub> yr<sup>-1</sup> averaged  
4586 over the period 2010-2019, with an uncertainty of about ±2% (range 485-532 Tg CH<sub>4</sub> yr<sup>-1</sup>). All the inverse models account  
4587 for CH<sub>4</sub> oxidation by OH and O(<sup>1</sup>D), and some include stratospheric Cl oxidation (Table S8 to S11). Most of the top-down  
4588 models use the OH distribution from the TRANSCOM experiment (Patra et al., 2011) either as fixed over the period or  
4589 including inter annual variability from Patra et al. (2021). This study shows no trend in OH and IAV below ±4%, in  
4590 agreement with Thompson et al. (2024) (no significant OH trend and IAV < 2%). As a result, the range of the top-down  
4591 sink estimates is rather low compared to bottom-up estimates (see below). Differences between transport models affect the  
4592 chemical removal of CH<sub>4</sub>, leading to different chemical loss rates, even with the same OH distribution. However,  
4593 uncertainties in the OH distribution and magnitude (around ±10% at the global scale, Zhao et al., 2019) are not considered  
4594 in our study, while they could contribute to a significant change in the chemical sink, and then in the derived posterior  
4595 emissions through the inverse process ((Zhao et al., 2020), around ±17% at the global scale, much larger than the model  
4596 spread derived here. The chemical sink represents more than 90% of the total sink, the rest being attributable to soil uptake  
4597 (35 [35-36] Tg CH<sub>4</sub> yr<sup>-1</sup>). The rather narrow range is due to the use of the same climatological soil sink provided within the  
4598 modelling protocol which is based on Murgia-Flores et al. (2018). This sink estimate used as prior in the inversions is a bit  
4599 higher than the mean estimate of the soil sink calculated by bottom-up models (30 Tg CH<sub>4</sub> yr<sup>-1</sup>, Sec. 3.3.4).

4600 **Bottom-up estimates.** The total chemical loss for the 2010s reported here is 602 Tg CH<sub>4</sub> yr<sup>-1</sup> with an uncertainty of 21%  
4601 (~125 Tg CH<sub>4</sub> yr<sup>-1</sup>). Differences in chemistry schemes in the models (especially in the stratosphere) and in the volatile  
4602 organic compound treatment probably explain most of the discrepancies among models (Zhao et al., 2019).

### 4603 5.2 Latitudinal and regional methane budgets

4604 The latitudinal and regional breakdown of the bottom-up budget is based on crude assumptions that we acknowledge here.  
4605 Natural and indirect anthropogenic emissions are based on wetland gridded products from land surface models and the  
4606 combination of the maps from lakes and ponds from Johnson et al. (2022), reservoirs from Johnson et al. (2022) and streams  
4607 and rivers from Rocher-Ros et al. (2023), the sum of those three scaled to 89 Tg CH<sub>4</sub> yr<sup>-1</sup> (shown in Fig. 5) to artificially  
4608 include the double counting (estimated only at the global scale) and match the global estimate. However, we acknowledge  
4609 that this procedure distributes the double counting relatively to the final emission distribution and not according to the  
4610 freshwater ecosystems where the double counting probably occurs. Wild animals and permafrost maps do not exist and are

Supprimé :

Mis en forme : Police :Gras, Couleur de police : Noir

Mis en forme : Normal, Espace Avant : 12 pt, Après : 12 pt, Paragraphes solidaires, Bordure : Haut: (Pas de bordure), Bas: (Pas de bordure), Gauche: (Pas de bordure), Droite: (Pas de bordure), Entre : (Pas de bordure)

Supprimé: The CH<sub>4</sub> chemical removal from the atmosphere is estimated to 518 Tg CH<sub>4</sub> yr<sup>-1</sup> over the period 2008-2017, with an uncertainty of about ±5% (range 474-532 Tg CH<sub>4</sub> yr<sup>-1</sup>). All the inverse models account for CH<sub>4</sub> oxidation by OH and O(<sup>1</sup>D), and some include stratospheric chlorine oxidation (Table S6). In addition, most of the top-down models use OH distribution from the TRANSCOM experiment (Patra et al., 2011), probably explaining the rather low range of estimates compared to bottom-up estimates (see below). Differences between transport models affect the chemical removal of CH<sub>4</sub>, leading to different chemical loss rates, even with the same OH distribution. However, uncertainties in the OH distribution and magnitude (Zhao et al., 2019) are not considered in our study, while it could contribute to a significant change in the chemical sink, and then in the derived posterior emissions through the inverse process (Zhao et al., 2020). The chemical sink represents more than 90% of the total sink, the rest being attributable to soil uptake (38 [27-45] Tg CH<sub>4</sub> yr<sup>-1</sup>). Half of the top-down models use the climatological soil uptake magnitude (37-38 Tg CH<sub>4</sub> yr<sup>-1</sup>) and distribution from Ridgwell et al. (1999), while half of the models use an estimate from the biogeochemical model VISIT (Ito and Inatomi, 2012), which calculates varying uptake between 31 and 38 Tg CH<sub>4</sub> yr<sup>-1</sup> over the 2000-2017 period. These sink estimates used as prior in the inversions are generally

Déplacé (insertion) [2]

Supprimé: Bottom-up estimates. The total chemical loss for the 2000s reported here is 595 Tg CH<sub>4</sub> yr<sup>-1</sup> with an uncertainty of 22% (~130 Tg CH<sub>4</sub> yr<sup>-1</sup>). Differences in chemical schemes (especially in the stratosphere) and in the volatile organic compound treatment probably explain most of the discrepancies among models (Zhao et al., 2019).

Mis en forme : Police :Gras, Couleur de police : Noir

Mis en forme : Police :Gras, Couleur de police : Noir

Mis en forme : Normal, Retrait : Première ligne : 0 cm

4641 missing from the calculation, leading to around 3 Tg CH<sub>4</sub> yr<sup>-1</sup> of discrepancy. Geological and ocean sources are based on  
4642 Etiope et al. (2019) and Weber et al. (2019) gridded products scaled to 50 Tg CH<sub>4</sub> yr<sup>-1</sup> to be consistent to the reported global  
4643 values. Finally, we use the termite emission map produced for this budget and used in the global budget. The latitudinal  
4644 budget does not include the estimates from FAO and USEPA for the direct anthropogenic emissions as they are only  
4645 provided at country scale.

#### 4646 5.2.1 Latitudinal budget of total methane emissions

4647 The latitudinal breakdown of emissions inferred from atmospheric inversions reveals a dominance of tropical emissions of  
4648 364 Tg CH<sub>4</sub> yr<sup>-1</sup> [337-390], representing 64% of the global total (Table 5 and 6). 32% of the emissions are from the mid-  
4649 latitudes (187 Tg CH<sub>4</sub> yr<sup>-1</sup> [160-204]) and 4% from high latitudes (above 60°N). The ranges around the mean latitudinal  
4650 emissions are larger than for the global CH<sub>4</sub> sources. While the top-down uncertainty is less than ±5% at the global scale, it  
4651 increases to ±7% for the tropics, to ±12% the northern mid-latitudes and to more than ±20% in the northern high-latitudes  
4652 (for 2010-2019, Table 5). Both top-down and bottom-up approaches consistently show that CH<sub>4</sub> decadal emissions have  
4653 increased by ±21-27 Tg CH<sub>4</sub> yr<sup>-1</sup> in the tropics, and by ±5-16 Tg CH<sub>4</sub> yr<sup>-1</sup> in the northern mid-latitudes between 2000-2009  
4654 and 2010-2019 using the mean ensemble estimate.

4655 Over 2010-2019, at the global scale, satellite-based inversions infer almost identical emissions to ground-based inversions  
4656 (difference of +1 [-3-9] Tg CH<sub>4</sub> yr<sup>-1</sup>, with GOSAT based inversion a bit higher than surface measurements-based inversions),  
4657 when comparing consistently surface versus satellite-based inversions for each system, similar to Saunio et al. (2020). This  
4658 difference is much lower than the range derived between the different systems (range of 20 Tg CH<sub>4</sub> yr<sup>-1</sup> using surface- or  
4659 satellite-based inversions). This result reflects that differences in atmospheric transport among the systems probably have  
4660 more impact on the estimated global emissions than the types of observations assimilated.

4661 As expected, considering the different coverage of observation datasets, regional distributions of inferred emissions differ  
4662 depending on the nature of the observations used (satellite or surface). The largest differences (satellite-based minus surface-  
4663 based inversions) are observed over the tropical region, between -10 and +43 Tg CH<sub>4</sub> yr<sup>-1</sup> (90°S to 30°N), and the northern  
4664 mid-latitudes (between -36 and +2 Tg CH<sub>4</sub> yr<sup>-1</sup>). Satellite data provide stronger constraints on fluxes in tropical regions than  
4665 surface data, due to a much larger spatial coverage. It is therefore not surprising that differences between these two types of  
4666 observations are found in the tropical band, and consequently in the northern mid-latitudes to balance total emissions, thus  
4667 affecting the north-south gradient of emissions. However, the regional patterns of these differences are not consistent  
4668 through the different inverse systems. Indeed, some systems found higher emissions in the tropics when using GOSAT  
4669 instead of surface observations, while others found the opposite. This difference between inversion systems may depend on  
4670 whether or not a bias correction is applied to the satellite data based on surface observations, and also on the modelled  
4671 horizontal and vertical transports, in the troposphere and in the stratosphere.

Mis en forme : Police :Gras, Couleur de police : Noir

Mis en forme : Normal, Espace Avant : 12 pt, Après : 12 pt,  
Paragraphe solidaires, Bordure : Haut: (Pas de bordure), Bas:  
(Pas de bordure), Gauche: (Pas de bordure), Droite: (Pas de  
bordure), Entre : (Pas de bordure)

Supprimé: at 368

Supprimé: 399

Supprimé: 186

Supprimé: 166

Supprimé: methane

Supprimé: about ±

Supprimé: ±10

Supprimé: and

Supprimé: ±25

Supprimé: 2008-2017

Supprimé: methane

Supprimé: about 20

Supprimé: 7-18

Supprimé: 2008-2017, but not in

Supprimé: northern high latitudes

Supprimé: Over 2010-2017, at the global scale, satellite-based  
inversions infer almost identical emissions to ground-based  
inversions (difference of 3 [0-7] Tg CH<sub>4</sub> yr<sup>-1</sup>), when comparing  
consistently surface versus satellite-based inversions for each system.  
This difference is much lower than the range derived between the  
different systems (range of 20 Tg CH<sub>4</sub> yr<sup>-1</sup> using surface- or satellite-  
based inversions). This result reflects that differences in atmospheric  
transport among the systems probably have more impact than the  
types of observations assimilated on the estimated global emissions.  
In Saunio et al. (2016), satellite-based inversions reported 12 Tg  
higher global methane emissions compared to surface-based  
inversions. Differences in the ensemble, the use of only GOSAT data  
and the treatment of satellite data within each system compared to  
Saunio et al. (2016) explain the contrasting results. ¶  
As expected, the

Mis en forme : Anglais (G.B.)

Supprimé: 13

Supprimé: 26

Supprimé: 20

Supprimé: +15

Mis en forme : Anglais (G.B.)

Supprimé: the

Supprimé: model

4708 **5.2.2 Latitudinal methane emissions per source category**

4709 The analysis of the latitudinal  $\text{CH}_4$  budget per source category (Fig. 8 and Table 6) can be performed both for bottom-up

4710 and top-down approaches but with limitations. Bottom-up estimates of natural and indirect anthropogenic emissions are

4711 based on assumptions as specified at the beginning of this section 5.2. For top-down estimates, as already noted, the

4712 partitioning of emissions per source category has to be considered with caution. Indeed, using only atmospheric

4713  $\text{CH}_4$  observations to constrain  $\text{CH}_4$  emissions makes this partitioning largely dependent on prior emissions. However,

4714 differences in spatial patterns and seasonality of emissions can be utilised to constrain emissions from different categories

4715 by atmospheric methane observations (for those inversions solving for different sources categories, see Sect. 2.3).

4716 Agriculture and waste are the largest sources of  $\text{CH}_4$  emissions in the tropics and southern hemisphere (140 [121-150] Tg

4717  $\text{CH}_4 \text{ yr}^{-1}$  in the bottom-up budget and 150 [135-168] Tg  $\text{CH}_4 \text{ yr}^{-1}$  in the top-down budget, about 40% of total  $\text{CH}_4$  emissions

4718 in this region). However, combined wetland and inland freshwater emissions are nearly as large with 151 [85-234] Tg  $\text{CH}_4$

4719  $\text{yr}^{-1}$  in the bottom-up budget and 128 [112-155] Tg  $\text{CH}_4 \text{ yr}^{-1}$  in the top-down budget. Anthropogenic emissions dominate in

4720 the northern mid-latitudes, with the highest contribution from agriculture and waste emissions (40% of total emissions in

4721 the top-down budget), closely followed by fossil fuel emissions (32% of total emissions, top-down budget). Boreal regions

4722 are largely dominated by inland freshwater emissions (41% and 54% of total emissions, top-down and bottom-up budget,

4723 respectively).

4724 The largest discrepancies between the top-down and the bottom-up budgets are found in the mid-latitudes and boreal regions

4725 from the natural and indirect sources with bottom-up estimates twice as large as the top-down ones, especially in the inland

4726 freshwater category.

4727 The uncertainty for wetlands and inland freshwater emissions is larger in the bottom-up models than in the top-down models,

4728 (mostly wetlands), while uncertainty in anthropogenic emissions is larger in the top-down models than in the bottom-up

4729 inventories. The large uncertainty in tropical inland freshwater emissions (mostly wetlands) of  $\pm 44\%$  results from large

4730 regional differences between the bottom-up land-surface models. Although they are using the same forcings, their responses

4731 in terms of flux density show different sensitivities to temperature, water vapour pressure, precipitation, and radiation.

4732 **5.2.3 Regional budget for total emissions**

4733 The regional breakdown of emissions is provided for 18 continental regions (see map in Fig. S3 and Table S1 with the

4734 country aggregation in the supplementary materials).

4735 At the regional scale and, for the 2010-2019 decade, total methane emissions are dominated by South East Asia with 63 [52-

4736 71] Tg  $\text{CH}_4 \text{ yr}^{-1}$ , China with 57 [37-72] Tg  $\text{CH}_4 \text{ yr}^{-1}$ , and South Asia with 52 [43-60] Tg  $\text{CH}_4 \text{ yr}^{-1}$  (top-down budget). These

4737 top three emitters contribute 30% of total global  $\text{CH}_4$  emissions. The following high emitting regions are Brazil 47 [41-58]

4738 Tg  $\text{CH}_4 \text{ yr}^{-1}$ , Equatorial Africa 47 [39-59] Tg  $\text{CH}_4 \text{ yr}^{-1}$ , USA 38 [32-46] Tg  $\text{CH}_4 \text{ yr}^{-1}$ , Southwest South America 38 [30-48]

- Mis en forme : Police :Gras, Couleur de police : Noir
- Mis en forme : Normal, Espace Avant : 12 pt, Après : 12 pt, Paragraphes solidaires, Bordure : Haut: (Pas de bordure), Bas: (Pas de bordure), Gauche: (Pas de bordure), Droite: (Pas de bordure), Entre : (Pas de bordure)
- Supprimé: methane
- Supprimé: 7
- Supprimé: On the bottom
- Supprimé: side, some
- Supprimé: not (yet) available
- Supprimé: regional scale (mainly inland waters). Therefore, for freshwater emissions, we applied the latitudinal distribution of Bastviken et al. (2011) to the global reported value. Further details are in Table 109
- Supprimé: side
- Supprimé: methane
- Supprimé: methane
- Supprimé: utilized
- Supprimé: methane
- Supprimé: (130
- Supprimé: 137
- Supprimé: for
- Supprimé: 139 [127-157
- Supprimé: for
- Supprimé: 38
- Supprimé: methane
- Supprimé: 116 [71-146
- Supprimé: for
- Supprimé: 135 [116
- Supprimé: for
- Supprimé: One top-down model suggests lower emissions from Table 110
- Supprimé: 42
- Supprimé: 31
- Supprimé: wetland
- Supprimé: 60
- Supprimé: wetland
- Supprimé: ,
- Supprimé: wetland
- Supprimé: 65%)
- Supprimé: wetland extent
- Supprimé: More regional discussions were developed in Supplementary Table 111



4786 Tg CH<sub>4</sub> yr<sup>-1</sup>, Russia 36 [27-45] Tg CH<sub>4</sub> yr<sup>-1</sup>, Europe 31 [24-36] Tg CH<sub>4</sub> yr<sup>-1</sup>, Middle East 31 [24-39] Tg CH<sub>4</sub> yr<sup>-1</sup>, Northern  
4787 Africa 25 [23-29] Tg CH<sub>4</sub> yr<sup>-1</sup>, and Canada 20 [17-24] Tg CH<sub>4</sub> yr<sup>-1</sup>. Other regions contribute less than 20 Tg CH<sub>4</sub> yr<sup>-1</sup>.

#### 4788 **5.2.4 Regional budget per source category**

4789 **Natural and indirect anthropogenic emissions versus direct anthropogenic emissions.** In agreement with Stavert et al.  
4790 (2021), natural and indirect anthropogenic emissions are dominated by Brazil, Canada, Russia, Equatorial Africa and  
4791 Southeast Asia, contributing 126 Tg CH<sub>4</sub> yr<sup>-1</sup> in the bottom-up and 105 Tg CH<sub>4</sub> yr<sup>-1</sup> in the top-down budget (Table 7), i.e.,  
4792 47% and 50% of the global natural and indirect anthropogenic emissions in these budgets, respectively. At regional scale  
4793 also, the range of uncertainty in natural and indirect anthropogenic emissions are much larger in the bottom-up budget than  
4794 in the top-down budget (Fig. S5). Except for 4 regions (Canada, Brazil, Northern South America, Southwest South America),  
4795 direct anthropogenic emissions contribute more than half of the total regional emissions. Due to the large uncertainty and  
4796 discrepancies in natural and indirect emissions estimates, the regional direct anthropogenic fractions may differ between the  
4797 bottom-up and top-down budgets. However, in absolute values, the highest direct anthropogenic emitters are the same in  
4798 the two budgets with China and South Asia being the top two by far, contributing 56 [51-66] Tg CH<sub>4</sub> yr<sup>-1</sup> and 45 [44-47] Tg  
4799 CH<sub>4</sub> yr<sup>-1</sup>, respectively (bottom-up values, Fig. 9 and Table 7). These two regions contribute 28% (26%) of the global direct  
4800 anthropogenic emissions in the bottom-up (top-down) budget. The ranks of direct anthropogenic emitters are similar to those  
4801 presented in the last budget (Stavert et al., 2021). Southeast Asia, United States of America, Middle East, Europe, Equatorial  
4802 Africa, and Russia emit between 32 Tg CH<sub>4</sub> yr<sup>-1</sup> and 23 Tg CH<sub>4</sub> yr<sup>-1</sup> as direct anthropogenic emissions (bottom-up values,  
4803 Fig. 8). Brazil, Northern Africa, and Southwest South America emit between 10 CH<sub>4</sub> yr<sup>-1</sup> and 20 CH<sub>4</sub> yr<sup>-1</sup>, while the rest of  
4804 the regions emit less than 10 CH<sub>4</sub> yr<sup>-1</sup> direct anthropogenic emissions.

4805  
4806 **Sectoral emissions.** The sectoral partitioning at the regional scale has been derived from both bottom-up and top-down  
4807 approaches. However, the top-down budget has more limitations, as the sectoral partitioning is usually based on the prior  
4808 fluxes fractions at the pixel scale, and assimilating only total methane observations does not allow to disentangle the different  
4809 source sectors overlapping in a pixel grid. However, differences in spatial patterns and seasonality of emissions can still be  
4810 constrained by atmospheric CH<sub>4</sub> observations for those inversions solving for different sources categories (see Sect. 2.3).  
4811 Bottom-up approaches allow deeper sectorial splitting, especially in terms of direct anthropogenic emissions (Fig. 9). Table  
4812 7, Fig. 9 and Fig. 10 present the estimations of CH<sub>4</sub> emissions on average over 2010-2019. Fig. 10 presents the budgets for  
4813 three main categories (Combined wetland and inland freshwaters, Fossil fuels and Agriculture & Waste), a more detailed  
4814 figure and table including the five categories is available in the supplementary material (Fig. S6 and Table S13 to S18).  
4815 Values for each individual data-set for the decades 2000-2009, 2010-2019, and the last year 2020 are made available in a  
4816 spreadsheet (see Data Availability).

4817 For most regions, “Combined wetland and inland freshwater emissions” are the most uncertain in the bottom-up budget,  
 4818 and generally their range is larger than in the top-down budget. In the top-down budget, this category contributes the most  
 4819 to the regional emissions in Brazil 24 [20-33] Tg CH<sub>4</sub> yr<sup>-1</sup>, Southeast Asia 24 [14-29] Tg CH<sub>4</sub> yr<sup>-1</sup> (though similar to their  
 4820 Agriculture and Waste emissions 24 [21-31] Tg CH<sub>4</sub> yr<sup>-1</sup>, Equatorial Africa 22 [19-28] Tg CH<sub>4</sub> yr<sup>-1</sup>, Southwest South  
 4821 America 22 [14-33] Tg CH<sub>4</sub> yr<sup>-1</sup>, Canada 12 [9-18] Tg CH<sub>4</sub> yr<sup>-1</sup>, Northern South America 8 [6-10] Tg CH<sub>4</sub> yr<sup>-1</sup>, Southern  
 4822 Africa 7 [4-9] Tg CH<sub>4</sub> yr<sup>-1</sup>. Agriculture and Waste emissions dominates in South Asia 39 [33-43] Tg CH<sub>4</sub> yr<sup>-1</sup>, China 30 [13-  
 4823 37] Tg CH<sub>4</sub> yr<sup>-1</sup>, Europe 19 [16-23] Tg CH<sub>4</sub> yr<sup>-1</sup>, United States of America 13 [9-16] Tg CH<sub>4</sub> yr<sup>-1</sup>, Northern Africa 13 [12-  
 4824 14] Tg CH<sub>4</sub> yr<sup>-1</sup>, Central America 9 [8-10] Tg CH<sub>4</sub> yr<sup>-1</sup>, and Korea and Japan 3 [3-4] Tg CH<sub>4</sub> yr<sup>-1</sup>. Fossil fuel emissions  
 4825 dominate in the Middle East 18 [11-24] Tg CH<sub>4</sub> yr<sup>-1</sup> and Russia 14 [8-23] Tg CH<sub>4</sub> yr<sup>-1</sup> (close to their combined wetland and  
 4826 inland freshwater emissions of 11 [8-13] Tg CH<sub>4</sub> yr<sup>-1</sup>).  
 4827 The four largest contributors to the Fossil Fuel sector remain China, the Middle East, Russia, and the United States of  
 4828 America. Altogether they contribute 67 (64) Tg CH<sub>4</sub> yr<sup>-1</sup> in the bottom-up (top-down) budget, around 55% of the global  
 4829 fossil fuel emissions. The bottom-up and top-down approaches generally agree in terms of ensemble mean, except for China  
 4830 for which the top-down estimates suggest lower emissions than the inventories. While Chinese fossil fuel emissions occur  
 4831 mainly through coal mining activity (88%), the Middle East, Russia and the USA extract mainly oil and gas (100%,  
 4832 80%,72%).  
 4833 The three largest contributors to the Agriculture and Waste sector remain South Asia, China, and Southeast Asia. Together  
 4834 they contribute 88 (92) Tg CH<sub>4</sub> yr<sup>-1</sup> in the bottom-up (top-down) budget, around 40% of the global agriculture and Waste  
 4835 sector. While the ensemble means tend to agree between bottom-up and top-down budgets, the uncertainty derived from the  
 4836 top-down approaches is larger, especially for these three regions. CH<sub>4</sub> emissions due to rice cultivation originate mostly  
 4837 from these same three regions (South East Asia, China and South Asia). Livestock management emissions occurs mainly in  
 4838 South Asia 20 [18-22] Tg CH<sub>4</sub> yr<sup>-1</sup>, Brazil 12 [11-13] Tg CH<sub>4</sub> yr<sup>-1</sup>, China 11 [8-16] Tg CH<sub>4</sub> yr<sup>-1</sup>, and Europe 11 [10-12] Tg  
 4839 CH<sub>4</sub> yr<sup>-1</sup> (bottom-up estimates). The United States of America, Equatorial Africa, Northern Africa and Southwest South  
 4840 America emit between 7 Tg CH<sub>4</sub> yr<sup>-1</sup> and 10 Tg CH<sub>4</sub> yr<sup>-1</sup> in this sub-sector. Other regions emit less than 4 Tg CH<sub>4</sub> yr<sup>-1</sup> in the  
 4841 livestock management sector. The Waste sector emissions are dominated by three regions: China 11 [6-14] Tg CH<sub>4</sub> yr<sup>-1</sup>,  
 4842 South Asia 9 [4-11] Tg CH<sub>4</sub> yr<sup>-1</sup>, and Europe 8 [6-12] Tg CH<sub>4</sub> yr<sup>-1</sup> (bottom-up estimates). These three regions contribute  
 4843 around 40% of the global emissions of the Waste sector. It is worth noting that the uncertainty in the inventory estimates at  
 4844 the regional scale is around 40% (from the min-max range of the estimate, not including the uncertainty from each  
 4845 inventory).

## **6 Insights on the methane cycle from 2020-2022 during which there has been unprecedented high growth rates of methane emissions**

The mean emissions estimate for the last year of the budget (2020) was 608 [581-627] Tg CH<sub>4</sub> yr<sup>-1</sup> (Top-down),) with 65% of the emissions from direct anthropogenic sources. This is 65 Tg CH<sub>4</sub> yr<sup>-1</sup> higher (11%) than the mean emissions of the 2000-2009 decade and 6% higher than 2010-2019. 2020 was a second highest year in terms of atmospheric CH<sub>4</sub> growth rate (+15.2 ppb/yr) since systematic measurements began in the late 1980s, coming in just behind the highest in 2021 at 17.97 ppb/yr. A few studies analysed the large growth rate increase between 2019 (+9.7 ppb/yr) and 2020 (+15.2 ppb/yr) of +5.4 ppb/yr (corresponding to +14.4 ± 2.0 Tg CH<sub>4</sub> yr<sup>-1</sup>) (Peng et al., 2022; Stevenson et al., 2022). Peng et al. (2022) estimated that the 2019-2020 growth rate change was almost equally due to an increase in wetland emissions (6.9 ± 2.1 Tg CH<sub>4</sub> yr<sup>-1</sup>) and a decrease of the OH chemical loss (7.5 ± 0.8 Tg CH<sub>4</sub> yr<sup>-1</sup>) due to reduced OH precursor emissions during the COVID lockdown (Laughner et al., 2021). The COVID19 lockdown resulted in decreased NO<sub>x</sub> emissions and reduced fossil fuel related CH<sub>4</sub> emissions (Thorpe et al., 2023), leading to less OH production. At the global scale, Feng et al. (2023) calculated an emission increase of 27 Tg CH<sub>4</sub> yr<sup>-1</sup> between 2019 and 2020 considering constant OH, and a smaller increase of 21 Tg CH<sub>4</sub> yr<sup>-1</sup> when including a 1.4% decrease of OH. Increased emissions were mainly found in the northern tropics. Qu et al. (2022) also inferred a 31 Tg CH<sub>4</sub> yr<sup>-1</sup> increase of emissions, mostly in the tropics, half of it in Africa. Such a result is compatible with wetland driven abnormal emissions during a consecutive 3-year La Nina event spanning from 2020 to 2022 (Zhang et al., 2023; Nisbet et al., 2023). The difference in terms of methodology and approaches between these three studies make it difficult to compare them quantitatively but provide a robust understanding on the possible causes. Importantly, all the studies indicate, in various proportions, increasing CH<sub>4</sub> emissions in the tropics and in the boreal region, potentially driven by microbial emission from wetlands due to wetter and warmer climate, and a significant contribution of reduced OH concentrations due to COVID lockdown.

Based on our ensemble of data, we find that top-down approaches infer a much larger change in CH<sub>4</sub> emissions (median [Q1-Q3] at +23 [10-31] Tg CH<sub>4</sub> yr<sup>-1</sup>) than bottom-up approaches (-1 [-5-3] Tg CH<sub>4</sub> yr<sup>-1</sup>) between 2019 and 2020 (Fig. S7). Bottom-up approaches suggest a very small increase in wetland emissions (around +1 [0-3] Tg CH<sub>4</sub> yr<sup>-1</sup>), while top-down approaches suggest on average a larger increase for wetlands of +8 [5-11] Tg CH<sub>4</sub> yr<sup>-1</sup>, mainly in the tropics and mid-latitudes. It is worth noting that large uncertainties exist for a given year and that the inter annual variability is much lower than the ensemble spread. While bottom-up approaches suggest almost constant fossil fuel emissions and slight increase in agriculture and waste (+3 Tg CH<sub>4</sub> yr<sup>-1</sup>), top-down approaches tend to derive higher emissions changes (+6 Tg CH<sub>4</sub> yr<sup>-1</sup> from the fossil fuel sector and +11 Tg CH<sub>4</sub> yr<sup>-1</sup> from agriculture and waste as the median over the ensemble). Biomass burning emissions decreased using both approaches by about 5 Tg CH<sub>4</sub> yr<sup>-1</sup> in agreement with Peng et al. (2022). Some inversions were run with IAV of OH from Patra et al. (2021) and others with constant OH. However the inferred OH IAV in 2019 and 2020 are rather low (0.3% and 0.15% on yearly average) in Patra et al. (2021), leading to a small impact in

terms of emissions changes between 2019-2020, with +22 [9-31] (median [Q1-Q3]) based on the inversions with constant OH and 19 [7-28] based on the inversions with varying OH (Fig S8). This first analysis based on our ensemble shows how challenging it is to attribute CH<sub>4</sub> emissions changes to a specific sector or region between two years, because related uncertainties remain much larger than the targeted signal to explain. This calls again for further improvement of both approaches. NOAA estimates of 2021 and 2022 methane atmospheric growth rates 17.8.0±0.5 ppb/yr and 14.0±0.8 ppb/yr, respectively (Lan et al., 2024). They show a continuation of very high growth rates, challenging again our understanding of the methane budget. As of the time of submission of this manuscript, bottom-up estimates for anthropogenic emissions for 2021 and 2022 are only available from the EDGARv8 data set ([https://edgar.jrc.ec.europa.eu/dataset\\_ghg80](https://edgar.jrc.ec.europa.eu/dataset_ghg80); EDGAR, 2023). This research inventory suggests that anthropogenic emissions continued to increase from 2020 (374 Tg CH<sub>4</sub> yr<sup>-1</sup>) to 2021 (379 Tg CH<sub>4</sub> yr<sup>-1</sup>) and 2022 (386 Tg CH<sub>4</sub> yr<sup>-1</sup>) with around 62% of the increase due to the fossil fuel sources, 23 % from the Waste sector, and 14% from the agriculture sector (Table S19). The bottom-up estimate of wetland emissions for 2021-2023, derived from a single wetland model, indicates positive anomalies of 26 Tg CH<sub>4</sub> yr<sup>-1</sup> in 2020, 23 Tg CH<sub>4</sub> yr<sup>-1</sup> in 2021, and 21 Tg CH<sub>4</sub> yr<sup>-1</sup> 2022 relative to the 2000-2006 baseline (<https://earth.gov/ghgcenter/data-catalog/lpjwsl-wetlandch4-grid-v1>; Zhang et al., 2023).

## 7. Future developments, missing elements, and remaining uncertainties

In this budget, robust features and uncertainties on sources and sinks estimated by bottom-up or top-down approaches have been highlighted as well as discrepancies between the two budgets. Limitations of the different approaches have also been highlighted. Four shortcomings of the CH<sub>4</sub> budget were already identified in Kirschke et al. (2013) and Sauniois et al. (2016, 2020) and are revisited below pointing to key research areas. Although much progress has been made, they are still relevant, and actions are needed. However, these actions fall into different timescales and actors. Here, we revisit the four shortcomings of the contemporary methane budget and discuss how each weakness has been addressed since Sauniois et al. (2020). Each section ends by discussing remaining research needs with a list of suggestions, from higher to lower priority.

1. *Shortcoming 1: Towards a decrease of the high uncertainty in the amount of methane emitted by wetland and inland water systems, and a weakened double counting issue.*

This first shortcoming has probably received the largest interest in the last few years with significant improvements. First a community effort has been made based on more studies, documenting, or modelling more inland freshwater systems and synthesising emissions from the complex and heterogeneous ensemble of emitting areas: wetlands, ponds, lakes, reservoirs, streams, rivers, estuaries, and marine systems. The range of wetland and inland water emissions has been narrowed down with improved wetland extent and refined estimates for inland freshwater systems. Double counting between inland

**Mis en forme :** Police :Gras, Couleur de police : Noir

**Mis en forme :** Normal, Espace Avant : 24 pt, Après : 12 pt, Paragraphes solidaires, Bordure : Haut: (Pas de bordure), Bas: (Pas de bordure), Gauche: (Pas de bordure), Droite: (Pas de bordure), Entre : (Pas de bordure)

**Supprimé :** In this budget, uncertainties on sources and sinks estimated by bottom-up or top-down approaches have been highlighted as well as discrepancies between the two budgets. Limitations of the different approaches have also been highlighted. Four shortcomings of the methane budget were already identified in Kirschke et al. (2013) and Sauniois et al. (2016). Although progress has been made, they are still relevant, and actions are needed. However, these actions fall into different timescales and parties. In the following, we revisit the four shortcomings, or axis of research, of the current methane budget; how each weakness has been corrected since Sauniois et al. (2016), followed by a list of recommendations, from higher to lower priority, associated with the involved parties.

**Mis en forme :** Normal, Hiérarchisation + Niveau : 1 + Style de numérotation : 1, 2, 3, ... + Commencer à : 1 + Alignement : Gauche + Alignement : 0 cm + Retrait : 0,63 cm, Bordure : Haut: (Pas de bordure), Bas: (Pas de bordure), Gauche: (Pas de bordure), Droite: (Pas de bordure), Entre : (Pas de bordure)

**Mis en forme :** Couleur de police : Noir

**Supprimé :** The remaining large uncertainties strongly suggest the need to develop more studies integrating the different systems (wetlands, ponds, lakes, reservoirs, streams, rivers, estuaries, and marine systems), to avoid double counting issues, to associate proper emission to each category, but also to account for lateral fluxes. Since Sauniois et al. (2016), several workshops (e.g. Turner et al., 2019) and publications (e.g. Knox et al., 2019; Thornton et al., 2016a) contributed to implement previous recommendations and strategies to reduce uncertainties of methane emissions due to wetlands and other freshwater systems. One achievement is the reduced estimate (by ~20%, i.e. 35 Tg CH<sub>4</sub> yr<sup>-1</sup>) of the global wetland emissions, due to a refined wetland extent analysis and modifications of land surface model calibration. Methodology changes that could be integrated into the next methane budget releases include: Calibrating land surface models independently from top-down estimates; Evaluating land surface models against in-situ observations such as FLUXNET-CH<sub>4</sub> (Knox et al., 2019); and Using different wetland extent products to infer wetland emissions (e.g. WAD2M, GIEMS-2 (Prigent et al., 2020)).

freshwater systems has been estimated for the first time and accounted for in this budget. All these improvements decreased the discrepancy between top-down and bottom-up estimate of combined wetland and inland freshwater emissions from 156 Tg CH<sub>4</sub> yr<sup>-1</sup> in Sauniois et al. (2020) down to 85 Tg CH<sub>4</sub> yr<sup>-1</sup> in this update for the 2000-2009 decade. Gridded maps for lakes, ponds, reservoirs, and streams and rivers freshwater emissions have been produced over the past years (Johnson et al., 2021, 2022; Rocher-Ros et al., 2023) making the spatial distribution of CH<sub>4</sub> sources almost complete for the first time and allowing better description of prior emissions in future top-down inversions.

Next steps include on the short term, from highest to lowest priority include:

- (i) integration of spatial distribution of inland waters in atmospheric inversion models to reach a full description of prior methane sources and sinks.
- (ii) refinement of double counting estimation and its possible reduction with more precise spatial and temporal distributions of the different systems contributing to inland freshwater emissions by using very high-resolution satellite data (down to metre resolutions) to properly separate them. The development of a dynamical global high-resolution (typically few metres) classification of saturated soils and inundated surfaces based on satellite data (visible and microwave), surface inventories, and expert knowledge.
- (iii) continuation of ongoing efforts to calibrate and evaluate land surface models for wetland emissions against in-situ observations such as FLUXNET-CH<sub>4</sub> (Knox et al., 2019; Delwiche et al., 2021) or BAWLD-CH<sub>4</sub> (Kuhn et al., 2021) for boreal regions and avoid dependence on top-down estimates. It is still critical to increase the limited number of tropical observations and to assimilate them in the inverse systems to help address the issue (e.g., Kallinjal et al., 2023).
- (iv) continuation of ongoing efforts to develop a diversity of modelling approaches (among them process-based model or machine learning approaches) to estimate wetland and inland freshwater CH<sub>4</sub> emissions, including lateral fluxes, and reducing upscaling issues, as done by e.g. Zhuang et al. (2023) for lakes.
- (v) continuous integration of collected flux measurements such as in the FLUXNET-CH<sub>4</sub> activity (Knox et al., 2019; Delwiche et al., 2021) or in BAWLD-CH<sub>4</sub> data set (Kuhn et al., 2021) to provide global flux maps based on machine learning approaches or other approaches (Peltola et al., 2019; McNicol et al., 2023).

Over the long run, developing measurement systems will help to improve estimates of the diversity of wetland and inland freshwater sources, and further reduce uncertainties:

- More systematic measurements of CH<sub>4</sub> fluxes and their isotopic signatures from sites reflecting the diversity of environment of wetlands and inland waters, complemented with environmental meta-data (e.g., soil temperature and moisture, vegetation types, water temperature, acidity, nutrient concentrations, NPP, soil carbon density for wetlands, lake morphologies) will allow us to better understand and estimate the processes of production and transport to the atmosphere (diffusive, ebullitive, plants mediated...) and to better constrain methane fluxes and their isotopic signatures in the different modelling approaches (Glagolev et al., 2011; Turetsky et al., 2014).

**Supprimé :** , in

**Supprimé :** , for modelling, can be addressed by the land biogeochemistry community:

**Supprimé :** Finalizing a

**Mis en forme :** Normal, Sans numérotation ni puces

**Supprimé :** tens of meters

**Supprimé :** This improved area distribution will prevent double counting between wetlands and other freshwater systems, when used by land surface models;

**Supprimé :** <#>Finalizing ongoing efforts to develop process-based modelling approaches to estimate freshwater methane emissions, including lateral fluxes, and avoiding upscaling issues, as recently done by e.g. Maavara et al. (2019) for N<sub>2</sub>O; and <#>Using the collected flux measurements within the FLUXNET-CH<sub>4</sub> activity (Knox et al., 2019) to provide global flux maps based on machine learning approaches (Peltola et al., 2019).

**Supprimé :** water

**Supprimé :** <#>More systematic measurements from sites reflecting the diverse lake morphologies will allow us to better understand the short-term biological control on ebullition variability, which remains poorly known (Wik et al., 2014, 2016a); and <#>Extending monitoring of methane fluxes year round from the different natural sources (wetlands, freshwaters) complemented with environmental meta-data (e.g., soil temperature and moisture, vegetation types, water temperature, acidity, nutrient concentrations, NPP, soil carbon density) will allow us to enrich the FLUXNET-CH<sub>4</sub> observation dataset, and to better constrain methane fluxes and their isotopic signatures in land-surface models (Glagolev et al., 2011; Turetsky et al., 2014).

5006 2. Shortcoming 2: Towards a better assessment of uncertainties for global methane sinks in top-down and bottom-up  
5007 budgets.

5008 The inverse systems used here have similar caveats than those described in Saunois et al. (2016, 2020) (same OH field, same  
5009 kind of proxy method to optimise it) leading to quite constrained atmospheric sink and therefore total global CH<sub>4</sub> sources.  
5010 Although we have used the latest release of CCMI-2022 (Plummer et al., 2021) and CMIP6 simulations (Collins et al.,  
5011 2017), the uncertainty of derived CH<sub>4</sub> chemical loss from the chemistry climate models remains at the same (large) level  
5012 compared to the previous intercomparison project ACCMIP (Lamarque et al., 2013). The causes of uncertainties on the  
5013 CH<sub>4</sub> loss and the differences between the different OH fields derived from Chemistry Transport Models (CTM) and Climate  
5014 Chemistry Models (CCM) have been widely discussed (Nicely et al., 2017 ; Zhao et al., 2019). These results emphasise the  
5015 need to first assess, and then improve, atmospheric transport and chemistry models, especially vertically, and to integrate  
5016 robust representation of OH fields in atmospheric models. For the latter, Zhao et al. (2023) have proposed a new approach  
5017 based on OH precursor observations and a chemical box model to improve the 3D distributions of tropospheric OH radicals  
5018 obtained from atmospheric chemistry models. Finally, soil uptake estimates rely on very few studies, and interannual  
5019 variations remain underconstrained.

5020 Next steps, in the short term, could include developments by the modelling community in:

- 5021 - Estimating the soil uptake with different land surface models (creating an ensemble) and discussing its variations  
5022 over the past decade.
- 5023 - Assessing the impact of using updated and varying soil uptake estimates, especially considering a warmer climate  
5024 in the top-down approach. Indeed, for top-down models resolving for the net flux of CH<sub>4</sub> at the surface integrating  
5025 a larger estimate of soil uptake would allow larger emissions, and then reduce the uncertainty with the bottom-up  
5026 estimates of total CH<sub>4</sub> sources.
- 5027 - Further studying the reactivity of the air parcels in the chemistry climate models and defining new diagnostics to  
5028 assess modelled CH<sub>4</sub> lifetimes.
- 5029 - Applying Zhao et al. (2023) recipe to several CTM used for top-down inversions in order to increase consistency  
5030 between source and sink estimates in individual approaches.
- 5031 - Developing 3D inverse methods to optimise OH using CH<sub>4</sub> satellite data (Zhang et al., 2018) or halogenated  
5032 compounds beyond methyl chloroform (MCF), such as done in box models (Thompson et al., 2024) to derive a 3D  
5033 dynamical OH field or machine learning methods using satellite data to constrain OH (Anderson et al., 2023).
- 5034 - Integrating the aforementioned different potential OH chemical fields, including also inter-annual variability, to  
5035 assess the impact on the methane budget following Zhao et al. (2020).

5036 Over the long run, other parameters should be (better) integrated into top-down approaches, among them:

- 5037 - The magnitude of the CH<sub>4</sub> loss through oxidation by tropospheric Cl, a process debated in the recent literature.  
5038 More modelling (e.g., Thanwerdas et al., 2022b) and instrumental studies should be devoted to reducing the

**Mis en forme :** Couleur de police : Noir

**Mis en forme :** Normal, Hiérarchisation + Niveau : 1 + Style de numérotation : 1, 2, 3, ... + Commencer à : 1 + Alignement : Gauche + Alignement : 0 cm + Retrait : 0,63 cm, Bordure : Haut: (Pas de bordure), Bas: (Pas de bordure), Gauche: (Pas de bordure), Droite: (Pas de bordure), Entre : (Pas de bordure)

**Supprimé:** The inverse systems used here have the same caveats as described in Saunois et al. (2016) (same OH field, same kind of proxy method to optimize it) leading to quite constrained atmospheric sink and therefore total global methane sources. Although we have used a state-of-the-art ensemble of Chemistry Transport Models (CTM) and Climate Chemistry Models (CCM) simulations from the CCMI (Chemistry-Climate Model Initiative, Morgenstern et al. (2017)), the uncertainty of derived CH<sub>4</sub> chemical loss from the chemistry climate models remains at the same (large) level compared to the previous intercomparison project ACCMIP (Lamarque et al., 2013). Nicely et al. (2017) found that the main cause of the large differences in the CTM representation of CH<sub>4</sub> lifetime is variations in the chemical mechanisms implemented in the models. Using the ensemble of CTMs and CCMs from the CCMI experiment, Zhao et al. (2019) quantified the range of CH<sub>4</sub> loss induced by the ensemble of OH fields to be equivalent up to about half of the discrepancies between CH<sub>4</sub> observations and simulations as forced by the current anthropogenic inventories. These results emphasize the need to first assess, and then improve, atmospheric transport and chemistry models, especially vertically, and to integrate robust representation of OH fields in atmospheric models. Methodology changes that could be integrated into the next methane budget include: Integrating sensitivity tests on the prior fluxes (use of updated fluxes for natural sources, soil uptake); and Integrating sensitivity tests on chemical sinks (different OH fields, including interannual variability).

**Supprimé:** atmospheric

**Mis en forme :** Couleur de police : Noir

**Mis en forme :** Normal, Hiérarchisation + Niveau : 1 + Style de numérotation : Puce + Alignement : 0,63 cm + Retrait : 1,27 cm, Bordure : Haut: (Pas de bordure), Bas: (Pas de bordure), Gauche: (Pas de bordure), Droite: (Pas de bordure), Entre : (Pas de bordure)

**Supprimé :**

**Mis en forme :** Couleur de police : Noir

**Supprimé :**

**Mis en forme :** Couleur de police : Noir, Anglais (G.B.)

**Supprimé :**

**Supprimé:** <#>Developing robust representation of 3D OH fields to be used in the inverse models: based on chemistry climate models and using correction from measurements, on multi-sources

**Mis en forme :** Couleur de police : Noir

**Mis en forme** ... [113]

**Supprimé:** chlorine, a process debated in the recent literature. More modeling (Thanwerdas et al., 2019) and instrumental studies



uncertainty of this potential additional sink before integrating it in top-down models. This would be especially critical if inversions using <sup>13</sup>C-CH<sub>4</sub> observations are included in GMB in the future.

### 3. *Shortcoming 3: Towards a better partitioning of methane sources and sinks by region and process using top-down models*

In this work, we report inversions assimilating satellite data from GOSAT, which bring more constraints than provided by surface stations alone, especially over tropical continents. However, we still found that satellite- and surface-based inversions, and the different inversion systems do not consistently infer the same regional flux distribution.

The estimates contributing to the Global Methane budget are further used in more specific studies focusing on the comparison of the estimates from bottom-up and top-down approaches at national (Deng et al., 2022) and regional scales, including efforts from the GCP-REgional Carbon Cycle Assessment and Processes (RECCAP2) (Petrescu et al., 2021; 2023; Tibrewal et al., 2024; Lauerwald et al., 2023b; and other RECCAP-2 publications to come, see <https://www.globalcarbonproject.org/reccap/publications.htm>).

Next steps, in the short term, could integrate developments to be made by the top-down community:

- Including GOSAT 2 retrievals (Noël et al., 2022; Imasu et al., 2023) for the GOSAT-based inversions and considering TROPOMI-based inversions (as done in Tsuruta et al. (2023), Shen et al. (2023), Chen et al. (2022) and Qu et al. (2021)) in the next releases once at least 8 years of data are available to provide a decadal estimate and biases are reduced for global scale use (Lorente et al., 2023; Balasu et al., 2023). Indeed, recent satellite developments have provided higher temporal and spatial resolutions of CH<sub>4</sub> observations in regions with poor in-situ measurements (Figure S9, such as TROPOMI observations in North Africa).
- Integrating the newly available updated gridded products for the different natural sources of CH<sub>4</sub> in their prior fluxes (e.g. inland freshwaters) to reach a full spatial description of sources and sinks, and to be able to better compare the top-down budget with the bottom-up budget.
- Integration of the newly developed 4D variational inversion systems using isotopic species in the top-down budget (Basu et al., 2022; Thanwerdas et al., 2024; Drinkwater et al. 2023; Mannisenaho et al., 2023).
- Improving the availability of in-situ data at high temporal resolution for the scientific community, especially ones covering poorly documented regions such as China (Liu et al., 2021b; Guo et al., 2020), India (Nomura et al., 2021; Lin et al., 2015; Tiwari and Kumar, 2012) and Siberia (Sasakawa et al., 2010, 2017; Fujita et al., 2020; Winderlich et al., 2010), which are not delivered so far to international databases, or only at poor temporal resolution.
- Integrating the information from imagery satellites (e.g., TROPOMI, Carbon Mapper, Methane Sat, GHG Sat.) of high to super-emitters to improve prior fluxes of anthropogenic emissions in terms of quantity and locations for each covered sector.

#### Supprimé:

**Mis en forme :** Normal, Hiérarchisation + Niveau : 1 + Style de numérotation : 1, 2, 3, ... + Commencer à : 1 + Alignement : Gauche + Alignement : 0 cm + Retrait : 0,63 cm, Bordure : Haut: (Pas de bordure), Bas: (Pas de bordure), Gauche: (Pas de bordure), Droite: (Pas de bordure), Entre : (Pas de bordure)

**Mis en forme :** Couleur de police : Noir

**Supprimé:** inversions

**Déplacé vers le bas [3]:** Methodology changes that could be integrated into the next methane budget releases include:

**Supprimé:** Integrating GOSAT and GOSAT-2 (launched in October 2018, with expected improved precision and accuracy (JAXA, 2019)) for the satellite inversion; and Investigating the reasons for the regional differences derived by the inverse systems based on the model evaluation and more detailed questionnaire to the modelers on the treatment of satellite data (bias correction) and stratospheric profiles.

**Supprimé:** <#>Evaluating the benefits of using new satellite missions with high spatial resolution and "imaging capabilities" (Crisp et al., 2018) at the global scale, such as the TROPOMI instrument on Sentinel 5P, launched in October 2017 (Hu et al., 2018).

**Mis en forme :** Couleur de police : Noir

**Mis en forme :** Normal, Hiérarchisation + Niveau : 1 + Style de numérotation : Puce + Alignement : 0,63 cm + Retrait : 1,27 cm, Bordure : Haut: (Pas de bordure), Bas: (Pas de bordure), Gauche: (Pas de bordure), Droite: (Pas de bordure), Entre : (Pas de bordure)

**Mis en forme :** Couleur de police : Noir

**Supprimé:** ;

**Supprimé:** Releasing more regular updates and intercomparison

**Supprimé:** emission inventories in order to improve prior scenarios of inverse studies and reduce

**Supprimé:** need for extending them beyond their available coverage: Developing

**Supprimé:** system

**Mis en forme :** Couleur de police : Noir

**Supprimé:** and/or co-emitted

**Mis en forme :** Couleur de police : Noir

**Supprimé:** Indeed methane isotopes can provide additional constraints to partition the different CH<sub>4</sub> sources and sinks, if isotopic signatures can be better known spatially and temporally

**Mis en forme :** Couleur de police : Noir

**Mis en forme :** Couleur de police : Noir

**Supprimé:** <#>Improving the availability of in-situ data for the scientific community, especially ones covering poorly documented

5168 Over the long run, integrating more measurements and regional studies will help to improve the top-down systems, and  
5169 further reduce the uncertainties:

- 5170 - Extending the CH<sub>4</sub> surface networks to poorly observed regions (e.g., Tropics, China, India, high latitudes) and to  
5171 the vertical dimension: aircraft regular measurements (e.g., Filges et al., 2015; Brenninkmeijer et al., 2007; Paris  
5172 et al., 2010; Sweeney et al., 2015); Aircore campaigns (e.g., Andersen et al., 2018; Membrive et al., 2017); TCCON  
5173 observations (e.g., Wunch et al., 2011, 2019) remains critical to complement satellite data that do not observe well  
5174 in cloudy regions and at high latitudes, and also to evaluate and eventually correct satellite biases (Buchwitz et al.,  
5175 2016).
- 5176 - Extending and developing continuous isotopic measurements of CH<sub>4</sub> to help partitioning methane sources and to  
5177 be integrated in 4D variational isotopic inversions (e.g., Yacovitch et al., 2021).
- 5178 - Integrating global data from future satellite instruments with intrinsic low-bias, such as active LIDAR techniques  
5179 with MERLIN (Ehret et al., 2017), that are promising to overcome issues of systematic errors (Bousquet et al.,  
5180 2018) and should provide measurements over the Arctic, contrary to the existing and planned passive missions.
- 5181 - Other co-emitted species such as radiocarbon for fossil/non-fossil emissions (Lassey et al., 2007a, 2007b; Petrenko  
5182 et al., 2017), CO (e.g., Zheng et al., 2019) for biomass burning emissions, and ethane for fugitive emissions (e.g.,  
5183 Ramsden et al., 2022) could bring additional information for partitioning emissions.

5185 4. Shortcoming 4: Towards reducing uncertainties in the modelling of atmospheric transport in the models used in the  
5186 top-down budget

5187 The TRANSCOM experiment synthesised in Patra et al. (2011) showed a large sensitivity of the representation of  
5188 atmospheric transport on CH<sub>4</sub> abundances in the atmosphere. In particular, the modelled CH<sub>4</sub> budget appeared to depend  
5189 strongly on the troposphere-stratosphere exchange rate and thus on the model vertical grid structure and circulation in the  
5190 lower stratosphere. Also, regional changes in the CH<sub>4</sub> budget depend on the characteristics of the atmospheric transport  
5191 models used in the inversion (Bruhwiler et al., 2017; Locatelli et al., 2015). This axis of research is demanding important  
5192 development from the atmospheric modelling community. Waiting for future improvements (finer horizontal and vertical  
5193 resolutions, more accurate physical parameterization, increase in computing resources...), assessing atmospheric transport  
5194 error and the impact on the top-down budget remain crucial and mostly rely on the use of an ensemble of models.  
5195 Methodology changes that could be integrated into the next methane budget releases include:

- 5196 - Evaluating more deeply the inversions provided against independent measurements such as aircraft regular  
5197 campaigns available through for example the CH<sub>4</sub> GLOBALVIEWplus v6.0 ObsPack (Schuldt et al., 2023), the  
5198 IAGOS data portal (<https://iagos.aeris-data.fr/download/>), the NIES portal  
5199 (<https://db.cger.nies.go.jp/ged/en/datasetlist/index.html>) for CONTRAIL (e.g., Machida et al., 2008) and Siberian  
5200 measurements (e.g., Sasakawa et al., 2017), the WDCGG data portal (<https://gaw.kishou.go.jp/>) for additional

**Supprimé:** <#>Integrating global data from future satellite instruments with intrinsic low-bias, such as active LIDAR techniques with MERLIN (Ehret et al., 2017), that are promising to overcome issues of systematic errors (Bousquet et al., 2018) and should provide measurements over the Arctic, contrary to the existing and planned passive missions;¶  
<#>Extending the CH<sub>4</sub> surface networks to poorly observed regions (e.g. Tropics, China, India, high latitudes) and to the vertical dimension: aircraft regular campaigns (e.g. Paris et al., 2010; Sweeney et al., 2015); Aircore campaigns (e.g. Andersen et al., 2018; Membrive et al., 2017); TCCON observations (e.g. Wunch et al., 2011, 2019). These observations are still critical to complement satellite data that do not observe well in cloudy regions and at high latitudes, and also to evaluate and eventually correct satellite biases (Buchwitz et al., 2016);¶

**Mis en forme :** Couleur de police : Noir

**Supprimé:** methane using laser-based instruments

**Mis en forme :** Couleur de police : Noir

**Mis en forme :** Normal, Hiérarchisation + Niveau : 1 + Style de numérotation : Puce + Alignement : 0,63 cm + Retrait : 1,27 cm, Bordure : Haut: (Pas de bordure), Bas: (Pas de bordure), Gauche: (Pas de bordure), Droite: (Pas de bordure), Entre : (Pas de bordure)

**Supprimé:** ;

**Supprimé:** <#>Developing regional components of the CH<sub>4</sub> budget to improve global totals by feeding them with regional top-down and bottom-up approaches; for example, regional inversions using regional measurements and high resolution models (such as the INGOS project (Bergamaschi et al., 2018b) or the VERIFY project (<https://verify.lsce.ipsl.fr>) with the European ICOS network (<https://www.icos-ni.eu/home>). The RECCAP-2 project should also provide a scientific framework to further refine GHG budgets, including methane, at regional scales (<https://www.reccap2-gotemba2019.org/>).¶  
<#>¶

**Mis en forme :** Normal, Hiérarchisation + Niveau : 1 + Style de numérotation : 1, 2, 3, ... + Commencer à : 1 + Alignement : Gauche + Alignement : 0 cm + Retrait : 0,63 cm, Bordure : Haut: (Pas de bordure), Bas: (Pas de bordure), Gauche: (Pas de bordure), Droite: (Pas de bordure), Entre : (Pas de bordure)

**Mis en forme :** Couleur de police : Noir

**Déplacé (insertion) [4]**

**Mis en forme :** Anglais (G.B.)

**Déplacé (insertion) [3]**

**Supprimé:** The TRANSCOM experiment synthesised in Patra et al. (2011) showed a large sensitivity of the representation of atmospheric transport on methane concentrations in the atmosphere. In particular, the modelled CH<sub>4</sub> budget appeared to depend strongly on the troposphere-stratosphere exchange rate and thus on the model vertical grid structure and circulation in the lower stratosphere. Also, regional changes in the methane budget depends on the characteristics of the atmospheric transport models.

flights over three other Japanese airports and Orléans, France ; Aircore campaigns data set can be downloaded through the NOAA Global Monitoring Laboratory website (<https://gml.noaa.gov/ccgg/arc/?id=144>, Baier et al., 2021) and the French AirCore Program for atmospheric sampling (<https://aircore.aeris-data.fr>, Membrive et al., 2017); TCCON observations (<https://tccondata.org>; e.g., Wunch et al., 2011, 2019), and use this evaluation to weight the different models used in the CH<sub>4</sub> budget.

Next steps, in the short term, could include some development to be addressed by the top-down community to reduce atmospheric transport errors:

- Developing further methodologies to extract stratospheric partial column abundances from observations such as TCCON data (Saad et al., 2014; Wang et al., 2014), Aircore (e.g. Andersen et al., 2018; Membrive et al., 2017) or ACE-FTS (De Mazière et al., 2018) or MIPAS (Glatthor et al., 2023) satellite data.
- Combining SWIR and TIR measurements from space to better constrain the tropospheric column, from TROPOMI and IASI for example in the MethanePlus ESA project (<https://methaneplus.eu/#docs>, Buchwitz et al., 2023) or GOSAT (Kuze et al., 2020).
- Porting transport models codes to run on Graphics processing Units (GPU) to achieve sub-degrees resolution global inversions (Chevallier et al., 2023).

In the long run, developments within atmospheric transport models such as the implementation of hybrid vertical coordinates (Patra et al., 2018) or of hexagonal-icosaedric grid with finer resolution (Dubos et al., 2015; Niwa et al., 2017, 2022; Lloret et al., 2023), and improvements in the simulated boundary layer dynamics are promising to reduce atmospheric transport errors.

## 8 Conclusions

We have built an updated global methane budget by using and synthesizing a large ensemble of published methods and new results using a consistent, transparent, and traceable approach, including atmospheric observations and inversions (top-down models), process-based models for land surface emissions and atmospheric chemistry, and inventories of anthropogenic emissions (bottom-up models and inventories). For the 2010-2019 decade, global CH<sub>4</sub> emissions are 575 Tg CH<sub>4</sub> yr<sup>-1</sup> (range of 553-586 Tg CH<sub>4</sub> yr<sup>-1</sup>), as estimated by top-down inversions. About 65% of global emissions are anthropogenic (range of 63-68%). Bottom-up models and inventories suggest larger global emissions (669 Tg CH<sub>4</sub> yr<sup>-1</sup> [512-849]) mostly because of larger and more uncertain natural emissions from inland freshwater systems, natural wetlands, and geological leaks, and likely some unresolved double counting of these sources. It is also likely that some of the individual bottom-up emission estimates are too high, leading to larger global emissions from the bottom-up approach than the atmospheric constraints suggest. However, the important progress in this update is that for the first time, the bottom-up and top-down budgets agree within their uncertainty ranges. This is substantial progress toward defining more accurate global methane emissions.

**Déplacé vers le haut [4]:** This axis of research is demanding important development from the atmospheric modelling community. Waiting for future improvements (finer horizontal and vertical resolutions, more accurate physical parameterization, increase in computing resources...), assessing atmospheric transport error and the impact on the top-down budget

**Mis en forme :** Anglais (G.B.)

**Supprimé:** remains crucial. Methodology changes that could be integrated into the next methane budget releases include: Evaluating the inversions provided against independent measurements such as aircraft regular campaigns (e.g. Paris et al., 2010; Sweeney et al., 2015); Aircore campaigns (e.g. Andersen et al., 2018; Membrive et al., 2017); TCCON observations (e.g. Wunch et al., 2011, 2019), and use this evaluation to weight the different models used in the methane budget

**Mis en forme :** Anglais (G.B.)

**Mis en forme :** Couleur de police : Noir, Anglais (G.B.)

**Mis en forme :** Normal, Hiérarchisation + Niveau : 1 + Style de numérotation : Puce + Alignement : 0,63 cm + Retrait : 1,27 cm, Bordure : Haut: (Pas de bordure), Bas: (Pas de bordure), Gauche: (Pas de bordure), Droite: (Pas de bordure), Entre : (Pas de bordure)

**Supprimé:** (Saad et al., 2014; Wang et al., 2014), Aircore or, even ACE-FTS or MIPAS satellite data, and use them to replace erroneous simulated stratospheric profiles

**Mis en forme :** Couleur de police : Noir

**Supprimé:** In the long run, developments within atmospheric transport models such as the implementation of hybrid vertical... [118]

**Mis en forme** ... [119]

**Mis en forme :** Police : Gras, Couleur de police : Noir

**Supprimé:** a

**Supprimé:** synthesizing

**Supprimé:** and

**Supprimé:** 2008-2017

**Supprimé:** 576

**Supprimé:** 550-594

**Supprimé:**

**Supprimé:** 60

**Supprimé:** 50-70

**Supprimé:** much

**Supprimé:** 737

**Supprimé:** 594-881

**Supprimé:** water

**Supprimé:** some

**Supprimé:** perspective

The latitudinal breakdown inferred from the top-down approach reveals a dominant role of tropical emissions (~64%) compared to mid (~32%) and high (~4%) northern latitudes (above 60°N) emissions. Our results, including an extended set of atmospheric inversions, are compared with the previous budget syntheses of Kirschke et al. (2013) and Saunio et al. (2016; 2020). They show overall good consistency when comparing the same decade (2000-2009) at the global and latitudinal scales. The magnitude and uncertainty of most natural or indirect anthropogenic sources have been revised and updated. In particular, this new budget benefits from large efforts and collaborations from the research community to provide improved estimates of the magnitude and uncertainty of the different freshwater sources and helps reduce the potential double counting at the global scale. Of note, newly available gridded datasets for lakes, ponds, reservoirs, streams, and rivers allow building latitudinal and regional estimates for all these sources for the first time in these estimates. In the next review, we hope to be able to reduce uncertainties in emissions from inland freshwater systems by better quantifying the emission factors of each contributing sub-systems (streams, rivers, lakes, ponds) and estimating double counting at regional scale or avoiding double counting by better defining the surface areas of each ecosystem. Another important priority for improvements is the uncertainty on the chemical loss of CH<sub>4</sub> which still needs to be better assessed in both the top-down and the bottom-up budgets. Building on the improvement of the points detailed in Sect. 7, our aim is to update this budget synthesis as a living review paper regularly (~every three or four years). Each update will produce a more recent decadal CH<sub>4</sub> budget, highlight changes in emissions and trends, and incorporate newly available data and model improvements.

It is still under debate why exactly there are sustained increase of atmospheric CH<sub>4</sub> (more than +5 ppb yr<sup>-1</sup>) since 2007 (Nisbet et al., 2019; Turner et al., 2019). Some likely explanations, already introduced by Saunio et al. (2017) and further investigated by Jackson et al. (2020) and other studies, include, by decreasing order of certainty: 1) a positive contribution from microbial and fossil sources (e.g., Nisbet et al., 2019; Schwietzke et al., 2016; Jackson et al., 2020), a negative contribution from biomass burning emissions before 2014 (Giglio et al., 2013; Worden et al., 2017); 2) a negligible role of Arctic emission changes (e.g., Nisbet et al., 2019; Saunio et al., 2017); and 3) a tropical dominance of the increasing emissions (e.g., Saunio et al., 2017; Jackson et al., 2020; Wilson et al., 2021; Drinkwater et al., 2023). Although the accelerated atmospheric methane growth rate in 2020 (15.2 ppb/yr) has found some explanation with the impact of the world Pandemia in 2020, the sustained observed growth rates in 2021 (17.8 ppb/yr) and 2022 (14 ppb/yr) still challenge our understanding of the global methane cycle. While in Jackson et al. (2020), the increase in CH<sub>4</sub> emissions over the last two decades is attributed entirely to direct anthropogenic emissions, the uncertainty range from the GMB ensemble is large, and the contribution from natural emissions (wetlands) is still largely uncertain. Besides the decadal change in CH<sub>4</sub> emissions, large inter-annual variability can occur from these natural emissions. The recent high record of CH<sub>4</sub> growth rate highlights the potential of large variations from natural emissions from one year to another, in particular wetland emissions (e.g., Peng et al., 2022; Feng et al., 2023). These remain the challenges to be overcome in better quantifying global methane emissions.

**Supprimé:** approaches

**Supprimé:** (2013) and Saunio et al. (2016), and show overall good consistency when comparing the same decade (2000-2009) at the global and latitudinal scales, although estimation methods and reported studies have evolved between the three budgets. While, a comparison of top-down emissions estimates determined with and without satellite data agrees well globally they differ significantly at the latitudinal scale. Most worryingly, these differences were not even consistent in sign with some models showing notable increases in a given latitudinal flux and others decreases. This suggests that while the inclusion of satellite data may, in the future, significantly increase our ability to attribute fluxes regionally this is not currently the case due to their existing inherent biases along with the inconsistent application of methods to account for these biases, but also differences in model transport, especially in the stratosphere (see recommendations in Sect. 6).

**Supprimé:** Among the different uncertainties raised in Kirschke et al. (2013), Saunio et al. (2016) estimated that 30-40% of the large range associated with modelled wetland emissions in Kirschke et al. (2013) was due to the estimation of wetland extent. Here, wetland emissions are 35 Tg CH<sub>4</sub> yr<sup>-1</sup> smaller than previous estimates due to a refinement of wetland extent. The magnitude and uncertainty of all other natural sources have been revised and updated, leading to smaller emission estimates for oceans, geological sources, and wild animals, but higher emission estimates associated to larger range for non-wetland freshwater systems. This result places a number one priority on reducing uncertainties in emissions from inland water systems by better quantifying the emission factors of each contributing sub-systems (streams, rivers, lakes, ponds) and reducing both uncertain up-scaling and likely double counting with wetland emissions. As a second priority, the uncertainty on the chemical loss of methane need to be better assessed in both the top-down and the bottom-up budgets. Our work also suggests the need for more interactions among groups developing emission inventories in order to clarify the definition of the sectoral breakdown in inventories. Such an approach would allow easier comparisons at the sub-category scale.

Building on the improvement of the points detailed in Sect. 6, our aim is to update this budget synthesis as a living review paper regularly (~every two/three years). Each update will produce a more recent decadal CH<sub>4</sub> budget, highlight changes in emissions and trends, and incorporate newly available data and model improvements.

In addition to the decadal CH<sub>4</sub> budget presented in this paper, and following former studies (e.g. Bousquet et al., 2006), trends and year-to-year changes in the methane cycle continues to be thoroughly discussed in the recent literature (e.g. Nisbet et al., 2019; Turner et al., 2019). After almost a decade of stagnation in the late 1990s and early 2000s (Dlugokencky et al., 2011; Nisbet et al., 2016), a sustained atmospheric growth rate of more than +5 ppb yr<sup>-1</sup> has been observed since 2007, with a further acceleration after 2014 (Nisbet et al., 2019), and several years with a 2-digit atmospheric growth as in the 1980s. To date, no consensus has yet been reached in explaining the CH<sub>4</sub> trend since 2007. A likely explanatory scenario, already introduced in Saunio et al. (2017) and further investigated by some other studies since then, includes, by decreasing order of certainty, a positive contribution from microbial and fossil sources (e.g. Nisbet et al., 2019; Schwietzke et al., 2016), a negative contribution from biomass burning emissions before 2014 (Giglio et al., 2013; Worden et al., 2017), a downward revision of Chinese emissions, a negligible role of Arctic emission changes (e.g. Nisbet et al., 2019; Saunio et al., 2017).

The GCP will continue to support and coordinate the development of improved flux estimates for all budget components and new underlying science to support improved modelling, acquisition of observations, and data integration. At regular intervals (3–4 years), we will continue to bring all flux components together to produce an improved and updated global CH<sub>4</sub> budget, and provide a global benchmark for other CH<sub>4</sub> products and assessments.

## 2 Data availability

The data presented here are made available in the belief that their dissemination will lead to greater understanding and new scientific insights on the methane budget and changes to it, and help to reduce its uncertainties. The free availability of the data does not constitute permission for publication of the data. For research projects, if the data used are essential to the work to be published, or if the conclusion or results largely depend on the data, co-authorship should be considered. Full contact details and information on how to cite the data are given in the accompanying database.

The accompanying database includes a netcdf file defining the regions used, an archive with the maps of prior fluxes used in the top-down activity, an archive with data corresponding to Fig. 3 and 5, and one Excel file organised in the following spreadsheets.

The file Global\_Methane\_Budget\_2000–2020\_v1.0.xlsx includes (1) a summary, (2) the methane observed mixing ratio and growth rate from the four global networks (NOAA, AGAGE, CSIRO and UCI), (3) the evolution of global anthropogenic methane emissions (including biomass burning emissions) used to produce Fig. 2, (4) the global and latitudinal budgets over 2000–2009 based on bottom-up approaches, (5) the global and latitudinal budgets over 2000–2009 based on top-down approaches, (6) the global and latitudinal budgets over 2010–2019 based on bottom-up approaches, (7) the global and latitudinal budgets over 2010–2019 based on top-down approaches, (8) the global and latitudinal budgets for year 2020 based on bottom-up approaches, (9) the global and latitudinal budgets for year 2020 based on top-down approaches, and (10) the list of contributors to contact for further information on specific data.

This database is available from ICOS Carbon Portal (<https://doi.org/10.18160/GCP-CH4-2024/>, Martinez et al., 2024).

## Author contributions.

MS, AM, and JT gathered the bottom-up and top-down data sets and performed the post processing and analysis. MS, BP, PB, PeC, and RJ coordinated the global budget. MS, BP, PB, PeC, RJ, PP and PCi contributed to the update of the full text and all coauthors appended comments. AM, ED, and XL produced the figures. DJB, NG, PH, AI, AJ, TK, TL, XL, KMcd, JMe, JMu, SP, CP, WR, HT, YY, WZ, ZZ, Qing Z, Qian Z and Qianlai Z performed surface land model simulations to compute wetland emissions. GA, DB, SC, BRD, GE, MAH, GH, MSJ, RL, SN, GRR, JAR, EHS, PRa, PRe, and TSW provided data sets useful for natural emission estimates and/or contributed to text on bottom-up natural emissions. LHI, SJS, TNF, GRvW, and MC provided anthropogenic data sets and contributed to the text for this section. AM, JT, PP, DBE, RJ,

**Mis en forme :** Normal, Espace Avant : 24 pt, Après : 12 pt, Paragraphes solidaires, Bordure : Haut: (Pas de bordure), Bas: (Pas de bordure), Gauche: (Pas de bordure), Droite: (Pas de bordure), Entre : (Pas de bordure)

**Mis en forme :** Police :Gras, Couleur de police : Noir

**Supprimé :** helping

**Supprimé :** organized

**Supprimé :** and two netcdf files defining the regions used to extend the anthropogenic inventories

**Supprimé :** 2017\_v2

**Supprimé :** 2008–2017

**Supprimé :** 2008– 2017

**Supprimé :** 2017

**Supprimé :** 2017

**Supprimé :** (<https://doi.org/10.18160/GCP-CH4-2019>, Saunois

**Supprimé :** 2019) and the Global Carbon Project (<http://www.globalcarbonproject.org>).

**Supprimé :** AS

**Supprimé :** BP

**Supprimé :** , AS

**Supprimé :** , AS

**Supprimé :** SH

**Supprimé :** MS

**Supprimé :** GP

**Supprimé :** VA

**Supprimé :** FJ

**Supprimé :** LL

**Supprimé :** PM,

**Supprimé :** SP,

**Supprimé :** HS,

**Supprimé :** MC, PC,

**Supprimé :** KC

**Supprimé :** KMJ, GL

**Supprimé :** CP

**Supprimé :** Pre, BT, NV, TW

**Supprimé :** usefull

**Supprimé :** contribute

**Supprimé :** GJM, FT, GvW, KMC,

**Supprimé :** contribute

**Supprimé :** BP, NC, MI, SM, JMcN



YN, AS, AT, and BZ performed atmospheric inversions to compute top-down methane emission estimates for sources and sinks. EJD, XL, DRB, PBK, JM, RJP, MR, MS, DWo, and YYo are PI of atmospheric observations used in top-down inversions and/or contributed the text describing atmospheric methane observations. FD, MS, and JT contributed to the bottom-up chemical sink section by providing data sets, processing data and/or contributing to the text. FMF provided data for the soil sink.

**Competing interests.** At least one of the (co-)authors is a member of the editorial board of Earth System Science Data.

**Acknowledgements**

This paper is the result of a collaborative international effort under the umbrella of the Global Carbon Project, a project of Future Earth and a research partner of the World Climate Research Programme (WCRP). We acknowledge all the people and institutions who provided the data used in the global methane budget as well as the institutions funding parts of this effort (see Table A3). We acknowledge the modelling groups for making their simulations available for this analysis, the joint WCRP Stratosphere-troposphere Processes And their Role in Climate/International Global Atmospheric Chemistry (SPARC/IGAC) Chemistry-Climate Model Initiative (CCMI) for organising and coordinating the model data analysis activity, and the British Atmospheric Data Centre (BADC) for collecting and archiving the CCMI model output. We acknowledge the long-term support provided by the Commonwealth Scientific and Industrial Research Organisation (CSIRO) and the National Environmental Science Program - Climate Systems Hub to coordinate and support activities of the Global Carbon Project. We are grateful to the Emissions Database for Global Atmospheric Research (EDGAR) team (M. Crippa, D. Guizzardi, F. Pagani, M. Banja, E. Schaaf, M. Muntean, W. Becker, F. Monforti-Ferrario) for the work needed to publish the EDGAR greenhouse gas emission datasets used in this work (<https://edgar.jrc.ec.europa.eu/>). We are particularly indebted to the dedicated station/instrumental operators/scientists that have gathered the data and ensured their high quality.

We acknowledge more specifically Katherine Jensen for her contribution to the Surface Water Microwave Product Series SWAMPS, Fortunat Joos for his contribution to simulations with the Land surface Processes and eXchanges model (LPX Bern), Ray Langenfeld for his contribution to CSIRO network, Paul Miller for his contribution to simulations with the Lund-Potsdam-Jena General Ecosystem Simulator (LPJ-GUESS), Peng Shushi for his contribution to simulations with the Organising Carbon and Hydrology In Dynamic Ecosystems (ORCHIDEE) model, Shamil Maksyutov for his contribution for simulations with the inverse model at the National Institute for Environmental Studies (NIES), Isobel Simpson for her contribution to the University of California Irvine (UCI) network, Paul Steele for his former contribution to CSIRO network, Ray Weiss for his contribution to the Advanced Global Atmospheric Gases Experiment (AGAGE) network, Christine Widenmeyer for her contribution with the Fire INventory from the National Center for Atmospheric Research (FINN) database, Xiaoming Xu for his contribution to simulations with the The Integrated Science Assessment Model

- Supprimé: YY,
- Supprimé: .
- Supprimé: GB, CCr, CF, PK, RL, TM, IM, SO'D
- Supprimé: RP,
- Supprimé: IJS, PS, YT, RFW
- Supprimé: DWu,
- Supprimé: YZ, MvW, AV, VN, MIH
- Supprimé: set
- Supprimé: contribute
- Supprimé: and CCu
- Supprimé: and contributed to the text of this section
- Mis en forme : Anglais (G.B.)
- Supprimé: The
- Mis en forme : Anglais (G.B.)
- Supprimé: declare that they have no conflict of interest.
- Mis en forme : Police :Non Gras, Anglais (G.B.)
- Mis en forme : Anglais (E.U.)
- Supprimé: .
- Supprimé: A1
- Supprimé: We acknowledge Adrian Gustafson for his contribution to prepare the simulations of LPJ-GUESS. Paul A. Miller, Adrian Gustafson and Wenxin Zhang acknowledge this work as a contribution to the Strategic Research Area MERGE. FAOSTAT data collection, analysis



593 (ISAM), Yuanzhi Yao for his contribution to simulations with the Dynamiel Land Ecosystem Model (DLEM), Diego  
 594 Guizzardi for his contribution to EDGAR, Maria Tenkanen for her contribution with the Crabon Tracker – Europe (CTE)  
 595 outputs, Giulia Conchedda for her contribution to the Food and Agriculture Organization (FAO) database. FAOSTAT data  
 596 collection, analysis, and dissemination is funded through FAO regular budget funds. The contribution of relevant experts in  
 597 member countries is gratefully acknowledged. We acknowledge Juha Hatakka from the Finnish Meteorological Institute  
 598 (FMI) for making methane measurements at the Pallas station and sharing the data with the community. We thank Ariana  
 599 Sutton-Grier and Lisamarie Windham-Myers for reviewing an earlier version of this manuscript. Any use of trade, firm, or  
 600 product names  
 601 is for descriptive purposes only and does not imply endorsement by the US Government.

## References

- 605 Abe, Y., Bignell, D. E. and Higashi, T., Eds.: Termites: Evolution, Sociality, Symbioses, Ecology, Springer Netherlands,  
 606 Dordrecht., 2000.
- 607 Aho, K.S., J.H. Fair, J.D. Hosen, E.D. Kyzivat, L.A. Logozzo, G. Rocher-Ros, L.C. Weber, B. Yoon, and P.A. Raymond:  
 608 Distinct concentration-discharge dynamics in temperate streams and rivers: CO2 exhibits chemostasis while CH4  
 609 exhibits source limitation due to temperature control, Limnology and Oceanography, 66(10): p. 3656-3668., 2021
- 610 Allan, W., Lowe, D. C., Gomez, A. J., Struthers, H. and Brailsford, G. W.: Interannual variation of <sup>13</sup>C in tropospheric  
 611 methane: Implications for a possible atomic chlorine sink in the marine boundary layer, J. Geophys. Res.-Atmospheres,  
 612 110(D11), doi:10.1029/2004JD005650, 2005.
- 613 Allan, W., Struthers, H. and Lowe, D. C.: Methane carbon isotope effects caused by atomic chlorine in the marine  
 614 boundary layer: Global model results compared with Southern Hemisphere measurements, J. Geophys. Res.-  
 615 Atmospheres, 112(D4), D04306, doi:10.1029/2006jd007369, 2007.
- 616 Allen, D. T., Torres, V. M., Thomas, J., Sullivan, D. W., Harrison, M., Hendler, A., Herndon, S. C., Kolb, C. E., Fraser,  
 617 M. P., Hill, A. D., Lamb, B. K., Miskimins, J., Sawyer, R. F. and Seinfeld, J. H.: Measurements of methane emissions  
 618 at natural gas production sites in the United States, Proc Natl Acad Sci USA, 110(44), 17,768-17,773,  
 619 doi:10.1073/pnas.1304880110, 2013.
- 620 Allen, G. H., & Pavelsky, T. M.: Global extent of rivers and streams. Science, 361(6402), 585–588,  
 621 https://doi.org/10.1126/science.aat0636, 2018
- 622 Alvarez, R. A., Zavala-Araiza, D., Lyon, D. R., Allen, D. T., Barkley, Z. R., Brandt, A. R., Davis, K. J., Herndon, S. C.,  
 623 Jacob, D. J., Karion, A., Kort, E. A., Lamb, B. K., Lauvaux, T., Maasakkers, J. D., Marchese, A. J., Omara, M., Pacala,  
 624 S. W., Peischl, J., Robinson, A. L., Shepson, P. B., Sweeney, C., Townsend-Small, A., Wofsy, S. C. and Hamburg, S.  
 625 P.: Assessment of methane emissions from the U.S. oil and gas supply chain, Science, 361(6398), 186–188,

## Mis en forme : Anglais (G.B.)

**Supprimé:** Abe, Y., Bignell, D. E. and Higashi, T., Eds.: Termites: Evolution, Sociality, Symbioses, Ecology, Springer Netherlands, Dordrecht., 2000.  
 Alexe, M., Bergamaschi, P., Segers, A., Detmers, R., Butz, A., Hasekamp, O., Guerlet, S., Parker, R., Boesch, H., Frankenberg, C., Scheepmaker, R. A., Dlugokencky, E., Sweeney, C., Wofsy, S. C. and Kort, E. A.: Inverse modelling of CH<sub>4</sub> emissions for 2010–2011 using different satellite retrieval products from GOSAT and SCIAMACHY, Atmos Chem Phys, 15(1), 113–133, doi:10.5194/acp-15-113-2015, 2015.  
 Allan, W., Lowe, D. C., Gomez, A. J., Struthers, H. and Brailsford, G. W.: Interannual variation of <sup>13</sup>C in tropospheric methane: Implications for a possible atomic chlorine sink in the marine boundary layer, J. Geophys. Res.-Atmospheres, 110(D11), doi:10.1029/2004JD005650, 2005.  
 Allan, W., Struthers, H. and Lowe, D. C.: Methane carbon isotope effects caused by atomic chlorine in the marine boundary layer: Global model results compared with Southern Hemisphere measurements, J. Geophys. Res.-Atmospheres, 112(D4), D04306, doi:10.1029/2006jd007369, 2007.  
 Allen, D. T., Torres, V. M., Thomas, J., Sullivan, D. W., Harrison, M., Hendler, A., Herndon, S. C., Kolb, C. E., Fraser, M. P., Hill, A. D., Lamb, B. K., Miskimins, J., Sawyer, R. F. and Seinfeld, J. H.: Measurements of methane emissions at natural gas production sites in the United States, Proc Natl Acad Sci USA, 110(44), 17,768–17,773, doi:10.1073/pnas.1304880110, 2013.  
 Alvarez, R. A., Zavala-Araiza, D., Lyon, D. R., Allen, D. T., Barkley, Z. R., Brandt, A. R., Davis, K. J., Herndon, S. C., Jacob, D. J., Karion, A., Kort, E. A., Lamb, B. K., Lauvaux, T., Maasakkers, J. D., Marchese, A. J., Omara, M., Pacala, S. W., Peischl, J., Robinson, A. L., Shepson, P. B., Sweeney, C., Townsend-Small, A., Wofsy, S. C. and Hamburg, S. P.: Assessment of methane emissions from the U.S. oil and gas supply chain, Science, 361(6398), 186–188, doi:10.1126/science.aar7204, 2018.  
 Andersen, T., Scheeren, B., Peters, W. and Chen, H.: A UAV-based active AirCore system for measurements of greenhouse gases, Atmospheric Meas. Tech., 11(5), 2683–2699, doi:10.5194/amt-11-2683-2018, 2018.  
 André, J.-C., Boucher, O., Bousquet, P., Chanin, M.-L., Chappellaz, J. and Tardieu, B.: Le méthane : d'où vient-il et quel est son impact sur le climat ?, EDP Sciences, Académie des Sciences et Technologies, Paris., 2014.  
 Aoki, S., Nakazawa, T., Murayama, S. and Kawaguchi, S.: Measurements of atmospheric methane at the Japanese Antarctic Station, Syowa, Tellus, 44B(4), 273–281, doi:10.1034/j.1600-0889.1992.t01-3-00005.x., 1992.  
 Arora, V. K., Melton, J. R. and Plummer, D.: An assessment of natural methane fluxes simulated by the CLASS-CTEM model, Biogeosciences, 15(15), 4683–4709, doi:10.5194/bg-15-4683-2018, 2018.  
 Bader, W., Bovy, B., Conway, S., Strong, K., Smale, D., Turner, A. J., Blumenstock, T., Boone, C., Collaud Coen, M., Coulon, A., Garcia, O., Griffith, D. W. T., Hase, F., Hausmann, P., Jones, N., Krummel, P., Murata, I., Morino, I., Nakajima, H., O'Doherty, S., Paton-Walsh, C., Robinson, J., Sandrin, R., Schneider, M., Servais, C., Sussmann, R. and Mahieu, E.: The recent increase of atmospheric methane from 10 years of ground-based NDACC FTIR observations since 2005, Atmospheric Chem. Phys., 17(3), 2255–2277, doi:10.5194/acp-17-2255-2017, 2017.  
 Baicich, P.: The Birds and Rice Connection, Bird Watch. Dig., [121]

doi:10.1126/science.aar7204, 2018.

Andersen, T., Scheeren, B., Peters, W. and Chen, H.: A UAV-based active AirCore system for measurements of greenhouse gases, *Atmospheric Meas. Tech.*, 11(5), 2683–2699, doi:10.5194/amt-11-2683-2018, 2018.

Anderson, D. C., Duncan, B. N., Nicely, J. M., Liu, J., Strode, S. A., and Follette-Cook, M. B.: Technical note: Constraining the hydroxyl (OH) radical in the tropics with satellite observations of its drivers – first steps toward assessing the feasibility of a global observation strategy, *Atmos. Chem. Phys.*, 23, 6319–6338, <https://doi.org/10.5194/acp-23-6319-2023>, 2023.

André, J.-C., Boucher, O., Bousquet, P., Chanin, M.-L., Chappellaz, J. and Tardieu, B.: Le méthane : d'où vient-il et quel est son impact sur le climat ?, EDP Sciences, Académie des Sciences et Technologies, Paris., 2014.

Aoki, S., Nakazawa, T., Murayama, S. and Kawaguchi, S.: Measurements of atmospheric methane at the Japanese Antarctic Station, Syowa., *Tellus*, 44B(4), 273–281, doi:10.1034/j.1600-0889.1992.t01-3-00005.x., 1992.

Arora, V. K., Melton, J. R. and Plummer, D.: An assessment of natural methane fluxes simulated by the CLASS-CTEM model, *Biogeosciences*, 15(15), 4683–4709, doi:10.5194/bg-15-4683-2018, 2018.

Bader, W., Bovy, B., Conway, S., Strong, K., Smale, D., Turner, A. J., Blumenstock, T., Boone, C., Collaud Coen, M., Coulon, A., Garcia, O., Griffith, D. W. T., Hase, F., Hausmann, P., Jones, N., Krummel, P., Murata, I., Morino, I., Nakajima, H., O'Doherty, S., Paton-Walsh, C., Robinson, J., Sandrin, R., Schneider, M., Servais, C., Sussmann, R. and Mahieu, E.: The recent increase of atmospheric methane from 10 years of ground-based NDACC FTIR observations since 2005, *Atmospheric Chem. Phys.*, 17(3), 2255–2277, doi:10.5194/acp-17-2255-2017, 2017.

Baichich, P.: The Birds and Rice Connection, Bird Watch. Dig. [online] Available from: [http://www.greatbirdingprojects.com/images/BWD\\_J-A\\_13\\_BIRDS\\_N\\_RICE.pdf](http://www.greatbirdingprojects.com/images/BWD_J-A_13_BIRDS_N_RICE.pdf), 2013.

Baier, B., Sweeney, C., Newberger, T., Higgs, J., Wolter, S., & NOAA Global Monitoring Laboratory : NOAA AirCore atmospheric sampling system profiles (Version 20230831) [Data set]. NOAA GML. <https://doi.org/10.15138/6AV0-MY81>, 2021

Balagus, N., Jacob, D. J., Lorente, A., Maasakkers, J. D., Parker, R. J., Boesch, H., Chen, Z., Kelp, M. M., Nesser, H., and Varon, D. J.: A blended TROPOMI+GOSAT satellite data product for atmospheric methane using machine learning to correct retrieval biases, *Atmos. Meas. Tech.*, 16, 3787–3807, <https://doi.org/10.5194/amt-16-3787-2023>, 2023.

Bansal, S., Van Der Berg, M.P., Fern, R.R., Jones, J.W., Lo, R., McKenna, O.P., Tangen, B.A., Zhang, Z., and Gleason, R.A.: Large increases in methane emissions expected from North America's largest wetland complex, *Sci. Adv.*, 9, eade1112, doi:10.1126/sciadv.ade1112, 2023.

Barba, J., Bradford, M. A., Brewer, P. E., Bruhn, D., Covey, K., van Haren, J., Megonigal, J. P., Mikkelsen, T. N., Pangala, S. R., Pihlatie, M., Poulter, B., Rivas-Ubach, A., Schadt, C. W., Terazawa, K., Warner, D. L., Zhang, Z. and Vargas, R.: Methane emissions from tree stems: a new frontier in the global carbon cycle, *New Phytol.*, 222(1), 18–28, doi:10.1111/nph.15582, 2019.

Bastviken, D., Tranvik, L. J., Downing, J. A., Crill, P. M. and Enrich-Prast, A.: Freshwater Methane Emissions Offset the Continental Carbon Sink, *Science*, 331(6013), 50–50, doi:10.1126/science.1196808, 2011.

Bastviken, D., C.C. Treat, S.R. Pangala, V. Gauci, A. Enrich-Prast, M. Karlson, M. Gålfalk, M.B. Romano, and H.O. Sawakuchi, The importance of plants for methane emission at the ecosystem scale. *Aquatic Botany*, 184: p. 103596, 2023.

Basu, S., Lan, X., Dlugokencky, E., Michel, S., Schwietzke, S., Miller, J. B., Bruhwiler, L., Oh, Y., Tans, P. P., Apadula, F., Gatti, L. V., Jordan, A., Necki, J., Sasakawa, M., Morimoto, S., Di Iorio, T., Lee, H., Arduini, J., and Manca, G.: Estimating emissions of methane consistent with atmospheric measurements of methane and  $\delta^{13}\text{C}$  of methane, *Atmos. Chem. Phys.*, 22, 15351–15377, <https://doi.org/10.5194/acp-22-15351-2022>, 2022.

Beaulieu, J.J., DelSontro, T. & Downing, J.A.: Eutrophication will increase methane emissions from lakes and impoundments during the 21st century. *Nat Commun* 10, 1375, <https://doi.org/10.1038/s41467-019-09100-5>, 2019

Beck, H., Zimmermann, N., McVicar, T. *et al.* Present and future Köppen-Geiger climate classification maps at 1-km resolution. *Sci Data* 5, 180214, doi.org/10.1038/sdata.2018.214, 2018

Beerling, D.J., Woodward, F.I., Vegetation and the Terrestrial Carbon Cycle: Modelling the First 400 Million Years. Cambridge University Press, Cambridge, 2001

Begum, M.S., M.J. Bogard, D.E. Butman, E. Chea, S. Kumar, X. Lu, O.K. Nayna, L. Ran, J.E. Richey, S.M. Tareq, D.T. Xuan, R. Yu, and J.-H. Park, Localized Pollution Impacts on Greenhouse Gas Dynamics in Three Anthropogenically Modified Asian River Systems. *Journal of Geophysical Research: Biogeosciences*, 126(5): p. e2020JG006124, 2021

Bergamaschi, P., Houweling, S., Segers, A., Krol, M., Frankenberg, C., Scheepmaker, R. A., Dlugokencky, E., Wofsy, S. C., Kort, E. A., Sweeney, C., Schuck, T., Brenninkmeijer, C., Chen, H., Beck, V. and Gerbig, C.: Atmospheric  $\text{CH}_4$  in the first decade of the 21st century: Inverse modeling analysis using SCIAMACHY satellite retrievals and NOAA surface measurements. *J. Geophys. Res. Atmospheres*, 118(13), 7350–7369, doi:10.1002/jgrd.50480, 2013.

Bergamaschi, P., DANILA, A. M., Weiss, R., Thompson, R. L., Brunner, D., Levin, I., meijer, Y., Chevallier, F., Janssens-Maenhout, G., Bovensmann, H., Crisp, D., Basu, S., Dlugokencky, E. J., Engelen, R., Gerbig, C., Günther, D., Hammer, S., Henne, S., Houweling, S., Karstens, U., Kort, E. A., Maione, M., Manning, A. J., Miller, J., Montzka, S., Pandey, S., Peters, W., Peylin, P., Pinty, B., Ramonet, M., Reimann, S., Röckmann, T., Schmidt, M., Strogies, M., Sussams, J., Tarasova, O., Van Aardenne, J., Vermeulen, A. and Vogel, F.: Atmospheric monitoring and inverse modelling for verification of greenhouse gas inventories, EUR - Scientific and Technical Research Reports, Publications Office of the European Union. [online] Available from: <https://ec.europa.eu/jrc/en/publication/eurscientific-and-technical-research-reports/atmospheric-monitoring-and-inverse-modelling-verification-greenhouse-gas-inventories> (Accessed 17 March 2020a), 2018.

Best, A. I., Richardson, M. D., Boudreau, B. P., Judd, A. G., Leifer, I., Lyons, A. P., et al.: Shallow Seabed Methane Gas Could Pose Coastal hazard. *Eos Trans. AGU* 87 (22), 213–217. doi:10.1029/2006EO220001, 2006

Bian, L., Gao, Z., Sun, Y., Ding, M., Tang, J. and Schnell, R. C.: CH<sub>4</sub> Monitoring and Background Concentration at Zhongshan Station, Antarctica, *Atmospheric Clim. Sci.*, 6(1), 135–144, doi:10.4236/acs.2016.61012, 2015.

Bignell, D.E., Eggleton, P. Termites in ecosystems. In: Abe, T., Higashi, M. and Bignell, D.E. (Eds), *Termites: Evolution, Sociality, Symbioses, Ecology*. Kluwer, Dordrecht, Netherlands, 363–387, 2000.

Biskaborn, B.K., Smith, S.L., Noetzi, J. *et al.* Permafrost is warming at a global scale. *Nat Commun* **10**, 264, <https://doi-org.insu.bib.cnrs.fr/10.1038/s41467-018-08240-4>, 2019

Blake, D. R. and Rowland, F. S.: World-wide increase in tropospheric methane, 1978–1983, *J. Atmospheric Chem.*, 4, 43–62, 1986.

Blake, D. R., Mayer, E. W., Tyler, S. C., Makide, Y., Montague, D. C. and Rowland, F. S.: Global Increase in Atmospheric Methane Concentrations between 1978 and 1980, *Geophys. Res. Lett.*, 9(4), 477–480, 1982.

Bloom, A. A., Lee-Taylor, J., Madronich, S., Messenger, D. J., Palmer, P. I., Reay, D. S. and McLeod, A. R.: Global methane emission estimates from ultraviolet irradiation of terrestrial plant foliage, *New Phytol.*, doi:10.1111/j.1469-8137.2010.03259.x, 2010.

Bohn, T. J., Melton, J. R., Ito, A., Kleinen, T., Spahni, R., Stocker, B. D., Zhang, B., Zhu, X., Schroeder, R., Glagolev, M. V., Maksyutov, S., Brovkin, V., Chen, G., Denisov, S. N., Eliseev, A. V., Gallego-Sala, A., McDonald, K. C., Rawlins, M. A., Riley, W. J., Subin, Z. M., Tian, H., Zhuang, Q. and Kaplan, J. O.: WETCHIMP-WSL: Intercomparison of wetland methane emissions models over West Siberia, *Biogeosciences*, 12(11), 3321–3349, doi:10.5194/bg-12-3321-2015, 2015.

Bodmer, P., Vroom, R. J. E., Stepina, T., del Giorgio, P. A., Kosten, S.: Methane dynamics in vegetated habitats in inland waters: quantification, regulation, and global significance, *Frontiers in Water*, 5, DOI=10.3389/frwa.2023.1332968, 2024

Borges, A. V. and Abril, G.: Carbon Dioxide and Methane Dynamics in Estuaries, in *Treatise on Estuarine and Coastal Science*, vol. 5, pp. 119–161, Academic Press, Waltham. [online] Available from: doi:10.1016/B978-0-12-374711-2.00504-0, 2011.

Borges, A., G. Abril, and S. Bouillon: Carbon dynamics and CO<sub>2</sub> and CH<sub>4</sub> outgassing in the Mekong delta, *Biogeosciences*, 15: p. 1093-1114., 2018

Borges, A.V., F. Darchambeau, T. Lambert, C. Morana, G.H. Allen, E. Tambwe, A. Toengaho Sembaito, T. Mambo, J. Nlandu Wabakhangazi, J.P. Descy, C.R. Teodoru, and S. Bouillon: Variations in dissolved greenhouse gases (CO<sub>2</sub>, CH<sub>4</sub>, N<sub>2</sub>O) in the Congo River network overwhelmingly driven by fluvial-wetland connectivity, *Biogeosciences*, 16(19): p. 3801-3834, 2019

Borges, A. V., Deirmendjian, L., Bouillon, S., Okello, W., Lambert, T., Roland, F.A. E., Razanamahandry, V. F., Voarintsoa, N.R. G., Darchambeau, F., Kimirei, I. A., Descy, J-P., Allen, G. H. and Morana, C.: Greenhouse gas emissions from African lakes are no longer a blind spot. *Sci. Adv.* 8, eabi8716, DOI:10.1126/sciadv.abi8716, 2022

Bousquet, P., Ciais, P., Miller, J. B., Dlugokencky, E. J., Hauglustaine, D. A., Prigent, C., Van der Werf, G. R., Peylin, P., Brunke, E. G., Carouge, C., Langenfelds, R. L., Lathiere, J., Papa, F., Ramonet, M., Schmidt, M., Steele, L. P., Tyler, S. C. and White, J.: Contribution of anthropogenic and natural sources to atmospheric methane variability, *Nature*, 443(7110), 439–443, 2006.

Bousquet, P., Pierangelo, C., Bacour, C., Marshall, J., Peylin, P., Ayar, P. V., Ehret, G., Bréon, F.-M., Chevallier, F., Crevoisier, C., Gibert, F., Rairoux, P., Kiemle, C., Armante, R., Bès, C., Cassé, V., Chinaud, J., Chomette, O., Delahaye, T., Edouart, D., Estève, F., Fix, A., Friker, A., Klonecki, A., Wirth, M., Alpers, M. and Millet, B.: Error Budget of the MEthane Remote LIdar mission and Its Impact on the Uncertainties of the Global Methane Budget, *J. Geophys. Res. Atmospheres*, 123(20), 11,766–11,785, doi:10.1029/2018JD028907, 2018.

Brandt, A. R., Heath, G. A., Kort, E. A., O'Sullivan, F., Pétron, G., Jordaan, S. M., Tans, P., Wilcox, J., Gopstein, A. M., Arent, D., Wofsy, S., Brown, N. J., Bradley, R., Stucky, G. D., Eardley, D. and Harriss, R.: Methane Leaks from North American Natural Gas Systems, *Science*, 343(6172), 733–735, doi:10.1126/science.1247045, 2014.

Brasseur, G. P. and Solomon, S.: *Aeronomy of the Middle Atmosphere: Chemistry and Physics of the Stratosphere and Mesosphere*, 3rd ed., Springer Netherlands, 2005.

Brenninkmeijer C. A. M., Crutzen, P., Boumard, F., Dauer, T., Dix, B., Ebinghaus, R., Filippi, D., Fischer, H., Franke, H., Fries, U., Heintzenberg, J., Helleis, F., Hermann, M., Kock, H. H., Koeppel, C., Lelieveld, J., Leuenberger, M., Martinsson, B. G., Miemczyk, S., Moret, H. P., Nguyen, H. N., Nyfeler, P., Oram, D., O'Sullivan, D., Penkett, S., Platt, U., Pupek, M., Ramonet, M., Randa, B., Reichelt, M., Rhee, T. S., Rohwer, J., Rosenfeld, K., Scharffe, D., Schlager, H., Schumann, U., Slemr, F., Sprung, D., Stock, P., Thaler, R., Valentino, F., van Velthoven, P., Waibel, A., Wandel, A., Waschitschek, K., Wiedensohler, A., Xueref-Remy, I., Zahn, A., Zech, U., and Ziereis, H.: Civil Aircraft for the regular investigation of the atmosphere based on an instrumented container: The new CARIBIC system, *Atmos. Chem. Phys.*, 7, 4953–4976, doi:10.5194/acp-7-4953-2007, 2007.

Bruhwyler, L. M., Basu, S., Bergamaschi, P., Bousquet, P., Dlugokencky, E., Houweling, S., Ishizawa, M., Kim, H.-S., Locatelli, R., Maksyutov, S., Montzka, S., Pandey, S., Patra, P. K., Petron, G., Saunio, M., Sweeney, C., Schwietzke, S., Tans, P. and Weatherhead, E. C.: U.S. CH<sub>4</sub> emissions from oil and gas production: Have recent large increases been detected?, *J. Geophys. Res. Atmospheres*, 122(7), 4070–4083, doi:10.1002/2016JD026157, 2017.

Brune, A.: Symbiotic digestion of lignocellulose in termite guts, *Nat Rev Microbiol* 12, 168–180, doi.org/10.1038/nrmicro3182, 2014

Buchwitz, M., de Beek, R., Burrows, J. P., Bovensmann, H., Warneke, T., Notholt, J., Meirink, J. F., Goede, A. P. H., Bergamaschi, P., Korner, S., Heimann, M. and Schulz, A.: Atmospheric methane and carbon dioxide from SCIAMACHY satellite data: initial comparison with chemistry and transport models, *Atmospheric Chem. Phys.*, 5, 941–962, 2005a.

Buchwitz, M., de Beek, R., Noel, S., Burrows, J. P., Bovensmann, H., Bremer, H., Bergamaschi, P., Korner, S. and

Heimann, M.: Carbon monoxide, methane and carbon dioxide columns retrieved from SCIAMACHY by WFM-  
 DOAS: year 2003 initial data set, *Atmospheric Chem. Phys.*, **5**, 3313–3329, 2005b.  
 Buchwitz, M., Dils, B., Boesch, H., Crevoisier, C., Detmers, R., Frankenberg, C., Hasekamp, O., Hewson, W., Laeng, A.,  
 Noel, S., Nothold, J., Parker, R., Reuter, M. and Schneising, O.: Product Validation and Intercomparison Report  
 (PVIR) for the Essential Climate Variable (ECV) Greenhouse Gases (GHG), *ESA Climate Change Initiative (CCI)*,  
 report version 4, Feb 2016, [http://www.esa-ghg-cci.org/?q=webfm\\_send/300](http://www.esa-ghg-cci.org/?q=webfm_send/300), 2016.  
 Buchwitz, M., Schneising, O., Vanselow, S., Houweling, S., van Peet, J., Siddans, R., Kerridge, B., Ventress, L., Knappett,  
 D., Crevoisier, C., Meilhac, N., Borsdorf, T., Lorente, A. and Aben, I.: Final Report of the Methane Plus ESA project,  
 TN-D15/16-CH4PLUS, <https://methaneplus.eu/#docs>, Accessed on February 13 2024, 202  
 Butz, A., Guerlet, S., Hasekamp, O., Schepers, D., Galli, A., Aben, I., Frankenberg, C., Hartmann, J. M., Tran, H., Kuze,  
 A., Keppel-Aleks, G., Toon, G., Wunch, D., Wennberg, P., Deutscher, N., Griffith, D., Macatangay, R.,  
 Messerschmidt, J., Notholt, J. and Warneke, T.: Toward accurate CO<sub>2</sub> and CH<sub>4</sub> observations from GOSAT, *Geophys.*  
*Res. Lett.*, **38**(14), L14812, doi:10.1029/2011gl047888, 2011.  
 Cai, Z. C., Xing, G., Yan, X., Xu, H., Tsuruta, H., Yagi, K. and Minami, K.: Methane and nitrous oxide emissions from  
 rice paddy fields as affected by nitrous fertilizers and water management, *Plant Soil*, **196**, 7–14, 1997.  
 Cael, B.B., J. Biggs, and D.A. Seekell, The size-distribution of earth's lakes and ponds: Limits to power-law behavior,  
*Frontiers in Environmental Science*, **10**-, 2022  
 Call, M., D. T. Maher, I. R. Santos, and others.: Spatial and temporal variability of carbon dioxide and methane fluxes  
 over semi-diurnal and spring–neap–spring timescales in a mangrove creek. *Geochim. Cosmochim. Acta* **150**: 211–225.  
 doi:10.1016/j.gca.2014.11.023, 2015  
 Canadell, J.G., P.M.S. Monteiro, M.H. Costa, L. Cotrim da Cunha, P.M. Cox, A.V. Eliseev, S. Henson, M. Ishii, S. Jaccard,  
 C. Koven, A. Lohila, P.K. Patra, S. Piao, J. Rogelj, S. Syampungani, S. Zaehle, and K. Zickfeld: Global Carbon and  
 other Biogeochemical Cycles and Feedbacks. In *Climate Change 2021: The Physical Science Basis. Contribution of*  
*Working Group I to the Sixth Assessment Report of the Intergovernmental Panel on Climate Change* [Masson-  
 Delmotte, V., P. Zhai, A. Pirani, S.L. Connors, C. Péan, S. Berger, N. Caud, Y. Chen, L. Goldfarb, M.I. Gomis, M.  
 Huang, K. Leitzell, E. Lonnoy, J.B.R. Matthews, T.K. Maycock, T. Waterfield, O. Yelekçi, R. Yu, and B. Zhou (eds.)],  
 Cambridge University Press, Cambridge, United Kingdom and New York, NY, USA, pp. 673–816, doi:  
 10.1017/9781009157896.007, 2021  
 Carlson, K. M., Gerber, J. S., Mueller, N. D., Herrero, M., MacDonald, G. K., Brauman, K. A., Havlik, P., O'Connell, C.  
 S., Johnson, J. A., Saatchi, S. and West, P. C.: Greenhouse gas emissions intensity of global croplands, *Nat. Clim.*  
*Change*, **7**(1), 63–68, doi:10.1038/nclimate3158, 2017.  
 Castelán-Ortega, O. A., Carlos Ku-Vera, J. and Estrada-Flores, J. G.: Modeling methane emissions and methane  
 inventories for cattle production systems in Mexico, *Atmósfera*, **27**(2), 185–191, doi:10.1016/S0187-6236(14)71109-



9, 2014.

Cathles, L., Brown, L., Taam, M. and Hunter, A.: A commentary on “The greenhouse-gas footprint of natural gas in shale formations” by R.W. Howarth, R. Santoro, and Anthony Ingraffea, *Clim. Change*, 113(2), 525–535, doi:10.1007/s10584-011-0333-0, 2012.

Caulton, D., Shepson, P. B., Santoro, R. L., Sparks, J. P., Howarth, R. W., Anthony R. Ingraffea, A. R., Cambaliza, M. O. L., Sweeney, C., Karion, A., Davis, K. J., Stirm, B. H., Montzka, S. A. and Miller, B. R.: Toward a better understanding and quantification of methane emissions from shale gas development, *Proc. Natl. Acad. Sci. USA*, 111(17), 6237–6242, doi:10.1073/pnas.1316546111, 2014.

Chandra, N., P. K. Patra, J. S. H. Bisht, A. Ito, T. Umezawa, S. Morimoto, S. Aoki, G. Janssens-Maenhout, R. Fujita, M. Takigawa, S. Watanabe, N. Saitoh, J.G. Canadell, Emissions from the oil and gas sectors, coal mining and ruminant farming drive methane growth over the past three decades, *J. Meteorol. Soc. Jpn.*, 99(2), doi:10.2151/jmsj.2021-015, 2021.

Chang, J., Peng, S., Ciais, P., Saunio, M., Dangal, S. R. S., Herrero, M., Havlik, P., Tian, H. and Bousquet, P.: Revisiting enteric methane emissions from domestic ruminants and their  $\delta^{13}\text{C}$  CH<sub>4</sub> source signature, *Nat. Commun.*, 10(1), 1–14, doi:10.1038/s41467-019-11066-3, 2019.

Chang, J., Peng, S., Yin, Y., Ciais, P., Havlik, P., & Herrero, M.: The key role of production efficiency changes in livestock methane emission mitigation. *AGU Advances*, 2, e2021AV000391, <https://doi.org/10.1029/2021AV000391>, 2021.

Chappellaz, J., Blunier, T., Raynaud, D., Barnola, J. M., Schwander, J. and Stauffert, B.: Synchronous changes in atmospheric CH<sub>4</sub> and Greenland climate between 40 and 8 kyr BP, *Nature*, 366(6454), 443–445, doi:10.1038/366443a0, 1993.

Chen, H., Zhu, Q., Peng, C., Wu, N., Wang, Y., Fang, X., Jiang, H., Xiang, W., Chang, J., Deng, X. and Yu, G.: Methane emissions from rice paddies natural wetlands, lakes in China: Synthesis new estimate, *Glob. Change Biol.*, 19(1), 19–32, doi:10.1111/gcb.12034, 2013.

Chen, Y. H. and Prinn, R. G.: Estimation of atmospheric methane emissions between 1996 and 2001 using a three-dimensional global chemical transport model, *J. Geophys. Res.-Atmospheres*, 111(D10307), doi:10.1029/2005JD006058, 2006.

Chen, Z., Jacob, D. J., Nesser, H., Sulprizio, M. P., Lorente, A., Varon, D. J., Lu, X., Shen, L., Qu, Z., Penn, E., and Yu, X.: Methane emissions from China: a high-resolution inversion of TROPOMI satellite observations, *Atmos. Chem. Phys.*, 22, 10809–10826, <https://doi.org/10.5194/acp-22-10809-2022>, 2022.

Chen, Y., Hall, J., van Wees, D., Andela, N., Hantson, S., Giglio, L., van der Werf, G. R., Morton, D. C., and Randerson, J. T.: Multi-decadal trends and variability in burned area from the fifth version of the Global Fire Emissions Database (GFED5), *Earth Syst. Sci. Data*, 15, 5227–5259, <https://doi.org/10.5194/essd-15-5227-2023>, 2023.

Chevallier, F., Lloret, Z., Cozic, A., Takache, S., and Remaud, M.: Toward high-resolution global atmospheric inverse modeling using graphics accelerators. *Geophysical Research Letters*, 50(5), 1–9, <https://doi.org/10.1029/2022GL102135>, 2023.

Ciais, P., Sabine, C., Bala, G., Bopp, L., Brovkin, V., Canadell, J., Chhabra, A., DeFries, R., Galloway, J., Heimann, M., Jones, C., Le Quéré, C., Myneni, R. B., Piao, S. and Thornton, P.: Carbon and Other Biogeochemical Cycles, in *Climate Change 2013: The Physical Science Basis. Contribution of Working Group I to the Fifth Assessment Report of IPCC*, edited by T. F. Stocker, D. Qin, G.-K. Plattner, M. Tignor, S. K. Allen, J. Boschung, A. Nauels, Y. Xia, V. Bex, and P. M. Midgley, Cambridge University Press, Cambridge., 2013.

Cicerone, R. J. and Oremland, R. S.: Biogeochemical aspects of atmospheric methane, *Glob. Biogeochem. Cycles*, 2, 299–327, 1988.

Cicerone, R. J. and Shetter, J. D.: Sources of atmospheric methane: Measurements in rice paddies and a discussion, *J. Geophys. Res.*, 86, 7203–7209, 1981.

Collins, W. J., Lamarque, J. F., Schulz, M., Boucher, O., Eyring, V., Hegglin, M. I., Maycock, A., Myhre, G., Prather, M., Shindell, D. and Smith, S. J.: AerChemMIP: quantifying the effects of chemistry and aerosols in CMIP6. *Geoscientific Model Development* 10, 585–607. doi:10.5194/gmd-10-585-2017, 2017.

Comer-Warner, S.A., P. Romeijn, D.C. Gooddy, S. Ullah, N. Kettridge, B. Marchant, D.M. Hannah, and S. Krause: Thermal sensitivity of CO<sub>2</sub> and CH<sub>4</sub> emissions varies with streambed sediment properties. *Nature Communications*, 9(1): p. 2803, 2018.

Conley, S., Franco, G., Faloona, I., Blake, D. R., Peischl, J. and Ryerson, T. B.: Methane emissions from the 2015 Aliso Canyon blowout in Los Angeles, CA, *Science*, 351(6279), 1317–1320, doi:10.1126/science.aaf2348, 2016.

Conrad, R., Klose, M. and Claus, P.: Phosphate Inhibits Acetotrophic Methanogenesis on Rice Roots, *Appl. Environ. Microbiol.*, 66(2), 828–831, 2000.

Covey, K. R. and Megonigal, J. P.: Methane production and emissions in trees and forests, *New Phytol.*, 222(1), 35–51, doi:10.1111/nph.15624, 2019.

Covey, K. R., Wood, S. A., Warren, R. J., Lee, X. and Bradford, M. A.: Elevated methane concentrations in trees of an upland forest, *Geophys. Res. Lett.*, 39(15), doi:10.1029/2012gl052361, 2012.

Covey, K. R., de Mesquita, C. P. B., Oberle, B., Maynard, D. S., Bettigole, C., Crowther, T. W., Duguid, M. C., Steven, B., Zanne, A. E., Lapin, M., Ashton, M. S., Oliver, C. D., Lee, X. and Bradford, M. A.: Greenhouse trace gases in deadwood, *Biogeochemistry*, 130(3), 215–226, doi:10.1007/s10533-016-0253-1, 2016.

Crawford, J.T. and E.H. Stanley: Controls on methane concentrations and fluxes in streams draining human-dominated landscapes. *Ecological Applications*, 26(5): p. 1581-1591, 2016.

Crevoisier, C., Nobileau, D., Fiore, A. M., Armante, R., Chedin, A. and Scott, N. A.: Tropospheric methane in the tropics - first year from IASI hyperspectral infrared observations, *Atmospheric Chem. Phys.*, 9(17), 6337–6350, 2009.

Crippa, M., Guizzardi, D., Solazzo, E., Muntean, M., Schaaf, E., Monforti-Ferrario, F., Banja, M., Olivier, J.G.J., Grassi, G., Rossi, S., Vignati, E., GHG emissions of all world countries - 2021 Report, EUR 30831 EN, Publications Office of the European Union, Luxembourg, 2021, ISBN 978-92-76-41547-3, doi:10.2760/173513, JRC126363, 2021

Crippa, M., Guizzardi, D., Pagani, F., Banja, M., Muntean, M., Schaaf E., Becker, W., Monforti-Ferrario, F., Quadrelli, R., Risquez Martin, A., Taghavi-Moharamli, P., Köykkä, J., Grassi, G., Rossi, S., Brandao De Melo, J., Oom, D., Branco, A., San-Miguel, J., Vignati, E., GHG emissions of all world countries, Publications Office of the European Union, Luxembourg, 2023, doi:10.2760/953322, JRC134504, 2023

Crutzen, P. J., Aselmann, I. and Seiler, W.: Methane production by domestic animals, wild ruminants, other herbivorous fauna, and humans, *Tellus B*, 38B(3–4), 271–284, doi:10.1111/j.1600-0889.1986.tb00193.x, 1986.

Cucchi, M., Weedon, G. P., Amici, A., Bellouin, N., Lange, S., Müller Schmied, H., Hersbach, H. and Buontempo, C.: WFDE5: bias-adjusted ERA5 reanalysis data for impact studies, *Earth System Science Data*, 12, 2097–2120, 2020

Cunnold, D. M., Steele, L. P., Fraser, P. J., Simmonds, P. G., Prinn, R. G., Weiss, R. F., Porter, L. W., O'Doherty, S., Langenfelds, R. L., Krummel, P. B., Wang, H. J., Emmons, L., Tie, X. X. and Dlugokencky, E. J.: In situ measurements of atmospheric methane at GAGE/AGAGE sites during 1985-2000 and resulting source inferences, *J. Geophys. Res. - Atmospheres*, 107(D14), doi:10.1029/2001jd001226, 2002.

Curry, C. L.: Modeling the soil consumption of atmospheric methane at the global scale, *Glob. Biogeochem. Cycles*, 21(4), GB4012, doi:10.1029/2006gb002818, 2007.

Dalsøren, S. B., Isaksen, I. S. A., Li, L. and Richter, A.: Effect of emission changes in Southeast Asia on global hydroxyl and methane lifetime, *Tellus B*, 61(4), 588–601, doi:10.1111/j.1600-0889.2009.00429.x, 2009.

Darmenov, A. and da Silva, A.: The quick fire emissions dataset (QFED) - Documentation of versions 2.1, 2.2 and 2.4, Technical Report Series on Global Modeling and Data Assimilation, NASA Global Modeling and Assimilation Office., [online] Available from: <https://gmao.gsfc.nasa.gov/pubs/docs/Darmenov796.pdf> (Accessed 11 March 2020), 2015.

De Mazière, M., Vigouroux, C., Bernath, P. F., Baron, P., Blumenstock, T., Boone, C., Brogniez, C., Catoire, V., Coffey, M., Duchatelet, P., Griffith, D., Hannigan, J., Kasai, Y., Kramer, I., Jones, N., Mahieu, E., Manney, G. L., Piccolo, C., Randall, C., Robert, C., Senten, C., Strong, K., Taylor, J., Tétard, C., Walker, K. A., and Wood, S.: Validation of ACE-FTS v2.2 methane profiles from the upper troposphere to the lower mesosphere, *Atmos. Chem. Phys.*, 8, 2421–2435, <https://doi.org/10.5194/acp-8-2421-2008>, 2008.

Deemer, B. R., Harrison, J. A., Li, S., Beaulieu, J. J., DelSontro, T., Barros, N., Bezerra-Neto, J. F., Powers, S. M., dos Santos, M. A. and Vonk, J. A.: Greenhouse Gas Emissions from Reservoir Water Surfaces: A New Global Synthesis, *BioScience*, 66(11), 949–964, doi:10.1093/biosci/biw117, 2016.

Deemer, B.R. and M.A. Holgerson, Drivers of Methane Flux Differ Between Lakes and Reservoirs, Complicating Global Upscaling Efforts, *Journal of Geophysical Research: Biogeosciences* 126(4): p. e2019JG005600., 2021.

Defratyka, S. M., Paris, J.-D., Yver-Kwok, C., Fernandez, J. M., Korben, P., and Bousquet, P.: Mapping Urban Methane Sources in Paris, France, *Environmental Science & Technology*, 55, 8583–8591, 10.1021/acs.est.1c00859, 2021.

DelSontro, T., Beaulieu, J. J. and Downing, J. A.: Greenhouse gas emissions from lakes and impoundments: Upscaling in the face of global change, *Limnol. Oceanogr. Lett.*, 3(3), 64–75, doi:10.1002/lol2.10073, 2018.

Delwiche, K. B., Knox, S. H., Malhotra, A., Fluet-Chouinard, E., McNicol, G., Feron, S., Ouyang, Z., Papale, D., Trotta, C., Canfora, E., Cheah, Y.-W., Christianson, D., Alberto, Ma. C. R., Alekseychik, P., Aurela, M., Baldocchi, D., Bansal, S., Billesbach, D. P., Bohrer, G., Bracho, R., Buchmann, N., Campbell, D. I., Celis, G., Chen, J., Chen, W., Chu, H., Dalmagro, H. J., Dengel, S., Desai, A. R., Detto, M., Dolman, H., Eichelmann, E., Euskirchen, E., Famulari, D., Fuchs, K., Goeckede, M., Gogo, S., Gondwe, M. J., Goodrich, J. P., Gottschalk, P., Graham, S. L., Heimann, M., Helbig, M., Helfter, C., Hemes, K. S., Hirano, T., Hollinger, D., Hörtnagl, L., Iwata, H., Jacotot, A., Jurasinski, G., Kang, M., Kasak, K., King, J., Klatt, J., Koebsch, F., Krauss, K. W., Lai, D. Y. F., Lohila, A., Mammarella, I., Belelli Marchesini, L., Manca, G., Matthes, J. H., Maximov, T., Merbold, L., Mitra, B., Morin, T. H., Nemitz, E., Nilsson, M. B., Niu, S., Oechel, W. C., Oikawa, P. Y., Ono, K., Peichl, M., Peltola, O., Reba, M. L., Richardson, A. D., Riley, W., Runkle, B. R. K., Ryu, Y., Sachs, T., Sakabe, A., Sanchez, C. R., Schuur, E. A., Schäfer, K. V. R., Sonnentag, O., Sparks, J. P., Stuart-Haëntjens, E., Sturtevant, C., Sullivan, R. C., Szutu, D. J., Thom, J. E., Torn, M. S., Tuittila, E.-S., Turner, J., Ueyama, M., Valach, A. C., Vargas, R., Varlagin, A., Vazquez-Lule, A., Verfaillie, J. G., Vesala, T., Vourlitis, G. L., Ward, E. J., Wille, C., Wohlfahrt, G., Wong, G. X., Zhang, Z., Zona, D., Windham-Myers, L., Poulter, B., and Jackson, R. B.: FLUXNET-CH4: a global, multi-ecosystem dataset and analysis of methane seasonality from freshwater wetlands, *Earth Syst. Sci. Data*, 13, 3607–3689, <https://doi.org/10.5194/essd-13-3607-2021>, 2021.

Deng, Z., Ciais, P., Tzompa-Sosa, Z. A., Saunio, M., Qiu, C., Tan, C., Sun, T., Ke, P., Cui, Y., Tanaka, K., Lin, X., Thompson, R. L., Tian, H., Yao, Y., Huang, Y., Lauerwald, R., Jain, A. K., Xu, X., Bastos, A., Sitch, S., Palmer, P. I., Lauvaux, T., d'Aspremont, A., Giron, C., Benoit, A., Poulter, B., Chang, J., Petrescu, A. M. R., Davis, S. J., Liu, Z., Grassi, G., Albergel, C., Tubiello, F. N., Perugini, L., Peters, W., and Chevallier, F.: Comparing national greenhouse gas budgets reported in UNFCCC inventories against atmospheric inversions, *Earth Syst. Sci. Data*, 14, 1639–1675, <https://doi.org/10.5194/essd-14-1639-2022>, 2022.

Denman, K. L., G. Brasseur, A. Chidthaisong, P. Ciais, P. M. Cox, R. E. Dickinson, D. Hauglustaine, C. Heinze, E. Holland, D. Jacob, U. Lohmann, S. Ramachandran, P. L. da Silva Dias, S. C. Wofsy and X. Zhang: *Couplings Between Changes in the Climate System and Biogeochemistry*, Cambridge University Press, Cambridge, United Kingdom and New York, NY, USA, 2007.

Dirmeyer, P. A., Gao, X., Zhao, M., Guo, Z., Oki, T., and Hanasaki, N. GSWP-2: Multimodel analysis and implications for our perception of the land surface. *Bulletin of the American Meteorological Society*, 87(10):1381–1398, 2006.

Dlugokencky, E. J., Dutton, E. G., Novelli, P. C., Tans, P. P., Masarie, K. A., Lantz, K. O. and Madronich, S.: Changes in CH<sub>4</sub> and CO growth rates after the eruption of Mt Pinatubo and their link with changes in tropical tropospheric UV

flux, *Geophys. Res. Lett.*, 23(20), 2761–2764, 1996.

Dlugokencky, E. J., Myers, R. C., Lang, P. M., Masarie, K. A., Crotwell, A. M., Thoning, K. W., Hall, B. D., Elkins, J. W. and Steele, L. P.: Conversion of NOAA atmospheric dry air CH<sub>4</sub> mole fractions to a gravimetrically prepared standard scale, *J Geophys Res.*, 110(D18306), doi:10.1029/2005JD006035., 2005.

Dlugokencky, E. J., Bruhwiler, L., White, J. W. C., Emmons, L. K., Novelli, P. C., Montzka, S. A., Masarie, K. A., Lang, P. M., Crotwell, A. M., Miller, J. B. and Gatti, L. V.: Observational constraints on recent increases in the atmospheric CH<sub>4</sub> burden, *Geophys. Res. Lett.*, 36, 5 PP., doi:200910.1029/2009GL039780, 2009.

Dlugokencky, E. J., Nisbet, E. G., Fisher, R. and Lowry, D.: Global atmospheric methane: budget, changes and dangers, *Philos. Trans. R. Soc. - Math. Phys. Eng. Sci.*, 369(1943), 2058–2072, 2011.

Dong, B., Xi, Y., Cui, Y., and Peng, S.: Quantifying Methane Emissions from Aquaculture Ponds in China, *Environ. Sci. Technol.*, 57, 1576–1583, <https://doi.org/10.1021/acs.est.2c05218>, 2023.

Downing, J.: Emerging global role of small lakes and ponds: Little things mean a lot. *Limnetica*, 29: p. 9-24, 2010

Drinkwater, A., Palmer, P. I., Feng, L., Arnold, T., Lan, X., Michel, S. E., Parker, R., and Boesch, H.: Atmospheric data support a multi-decadal shift in the global methane budget towards natural tropical emissions, *Atmos. Chem. Phys.*, 23, 8429–8452, <https://doi.org/10.5194/acp-23-8429-2023>, 2023.

Dubos, T., Dubey, S., Tort, M., Mittal, R., Meurdesoif, Y. and Hourdin, F.: DYNAMICO-1.0, an icosahedral hydrostatic dynamical core designed for consistency and versatility, *Geosci. Model Dev.*, 8(10), 3131–3150, doi:10.5194/gmd-8-3131-2015, 2015.

Dueck, T. A., de Visser, R., Poorter, H., Persijn, S., A. Gorissen, A., W. de Visser, W., Schapendonk, A., Verhagen, J., Snel, J., Harren, F. J. M., Ngai, A. K. Y., Verstappen, F., Bouwmeester, H., Voeselek, L. A. C. J. and van der Werf, A.: No evidence for substantial aerobic methane emission by terrestrial plants: a <sup>13</sup>C-labelling approach, *New Phytol.*, doi:10.1111/j.1469-8137.2007.02103.x, 2007.

Dutaur, L. and Verchot, L. V.: A global inventory of the soil CH<sub>4</sub> sink, *Glob. Biogeochem Cycles*, 21, GB4012, doi:10.1029/2006GB002734, 2007.

EDGAR (Emissions Database for Global Atmospheric Research) Community GHG Database, a collaboration between the European Commission, Joint Research Centre (JRC), the International Energy Agency (IEA), and comprising IEA-EDGAR CO<sub>2</sub>, EDGAR CH<sub>4</sub>, EDGAR N<sub>2</sub>O, EDGAR F-GASES version 8.0, European Commission, JRC (Datasets), available at [https://edgar.jrc.ec.europa.eu/dataset\\_ghg80](https://edgar.jrc.ec.europa.eu/dataset_ghg80), 2023

Eggleton, P., Homathevi, R., Jones, D., MacDonald, J., Jeeva, D., Bignell, D., Davies, R., and Maryati, M.: Termite assemblages, forest disturbance and greenhouse gas fluxes in Sabah, East Malaysia, *Philos. T. Roy. Soc. B*, 354, 1791–1802, doi: 10.1098/rstb.1999.0521, 1999

Ehhalt, D., Prather, M., Dentener, F., Derwent, R., Dlugokencky, E., Holland, E., Isaksen, I., Katima, J., Kirchhoff, V., Matson, P., Midgley, P. and Wang, M.: Atmospheric chemistry and greenhouse gases. In: *Climate Change 2001: The*

Scientific Basis. Contribution of Working Group I to the Third Assessment Report of the Intergovernmental Panel on Climate Change. [Houghton, J.T., et al. (eds.)]. Cambridge University Press, Cambridge, United Kingdom and New York, NY, USA, pp. 239-287, 2001.

Ehhalt, D. H.: The atmospheric cycle of methane, *Tellus*, 26(1-2), 58-70, doi:10.1111/j.2153-3490.1974.tb01952.x, 1974.

Ehret, G., Bousquet, P., Pierangelo, C., Alpers, M., Millet, B., Abshire, J. B., Bovensmann, H., Burrows, J. P., Chevallier, F., Ciais, P., Crevoisier, C., Fix, A., Flamant, P., Frankenberg, C., Gibert, F., Heim, B., Heimann, M., Houweling, S., Hubberten, H. W., Jockel, P., Law, K., Low, A., Marshall, J., Agusti-Panareda, A., Payan, S., Prigent, C., Rairoux, P., Sachs, T., Scholze, M. and Wirth, M.: MERLIN: A French-German Space Lidar Mission Dedicated to Atmospheric Methane, *Remote Sens.*, 9(10), 2017.

Etiopie, G.: Natural Gas Seepage. *The Earth's Hydrocarbon Degassing*, Springer International Publishing., 2015.

Etiopie, G.: Natural emissions of methane from geological seepage in Europe. *Atmosph. Environment*, 43, 1430-1443, doi:10.1016/j.atmosenv.2008.03.014., 2009

Etiopie, G. and Schwietzke, S.: Global geological methane emissions: an update of top-down and bottom-up estimates, *Elem Sci Anth*, 7(1), 47, doi:10.1525/elementa.383, 2019.

Etiopie, G., Lassey, K. R., Klusman, R. W. and Boschi, E.: Reappraisal of the fossil methane budget and related emission from geologic sources, *Geophys. Res. Lett.*, 35(9), L09307, doi:10.1029/2008gl033623, 2008.

Etiopie, G., Nakada, R., Tanaka, K. and Yoshida, N.: Gas seepage from Tokamachi mud volcanoes, onshore Niigata Basin (Japan): origin, post-genetic alterations and CH<sub>4</sub>-CO<sub>2</sub> fluxes, *App. Geochem.*, 26, 348-359, 2011.

Etiopie, G., Ciotoli, G., Schwietzke, S. and Schoell, M.: Gridded maps of geological methane emissions and their isotopic signature, *Earth Syst Sci Data*, 11(1), 1-22, doi:10.5194/essd-11-1-2019, 2019.

EU-Landfill-Directive: <https://eur-lex.europa.eu/legal-content/EN/TXT/?uri=CELEX:31999L0031>, 1999.

FAO: FAOSTAT Emissions Land Use database. Food and Agriculture Organization of the United Nations. Statistical Division., [online] Available from: <http://www.fao.org/faostat/en/#data/GL> (Accessed December 2022), 2022.

Federici, S., Tubiello, F. N., Salvatore, M., Jacobs, H. and Schmidhuber, J.: New estimates of CO<sub>2</sub> forest emissions and removals: 1990-2015, *For. Ecol. Manag.*, 352, 89-98, doi:10.1016/j.foreco.2015.04.022, 2015.

Feng, L., Braun, C., Arnold, S. R. and Gidden, M.: iiasa/emissions\_downscaling: Supplemental Data, doi:10.5281/zenodo.2538194, 2019.

Feng, L., Palmer, P. I., Parker, R. J., Lunt, M. F., and Bösch, H.: Methane emissions are predominantly responsible for record-breaking atmospheric methane growth rates in 2020 and 2021, *Atmos. Chem. Phys.*, 23, 4863-4880, <https://doi.org/10.5194/acp-23-4863-2023>, 2023.

Filges, A., Gerbig, C., Chen, H., Franke, H., Klaus, C., and Jordan, A.: The IAGOS-core greenhouse gas package: a measurement system for continuous airborne observations of CO<sub>2</sub>, CH<sub>4</sub>, H<sub>2</sub>O and CO, *Tellus B*, 68, 27989, <https://doi.org/10.3402/tellusb.v67.27989>, 2015.



Fleischer, P., Orsi, T. H., Richardson, M. D., and Anderson, A. L. (2001). Distribution of free gas in marine sediments: a global overview. *Geo-Marine Lett.*, 21, 103–122, 2001.

Flores, E., Rhoderick, G. C., Viallon, J., Moussay, P., Choteau, T., Gameson, L., Guenther, F. R. and Wielgosz, R. I.: Methane standards made in whole and synthetic air compared by cavity ring down spectroscopy and gas chromatography with flame ionization detection for atmospheric monitoring applications, *Anal. Chem.*, 87(6), 3272–3279, doi:10.1021/ac5043076, 2015.

Fluet-Chouinard, E., Stocker, B.D., Zhang, Z., Malhotra, A., Melton, J.R., Poulter, B., Kaplan, J.O., Goldewijk, K.K., Siebert, S., Minayeva, T., Hugelius, G., Joosten, H., Barthelmes, A., Prigent, C., Aires, F., Hoyt, A.M., Davidson, N., Finlayson, C.M., Lehner, B., Jackson, R.B., McIntyre, P.B.: Extensive global wetland loss over the past three centuries, *Nature*, 614(7947) 281–286, doi:10.1038/s41586-022-05572-6, 2023

Forster, P., T. Storelvmo, K. Armour, W. Collins, J.-L. Dufresne, D. Frame, D.J. Lunt, T. Mauritsen, M.D. Palmer, M. Watanabe, M. Wild, and H. Zhang: The Earth's Energy Budget, Climate Feedbacks, and Climate Sensitivity. In *Climate Change 2021: The Physical Science Basis. Contribution of Working Group I to the Sixth Assessment Report of the Intergovernmental Panel on Climate Change* [Masson-Delmotte, V., P. Zhai, A. Pirani, S.L. Connors, C. Péan, S. Berger, N. Caud, Y. Chen, L. Goldfarb, M.I. Gomis, M. Huang, K. Leitzell, E. Lonnoy, J.B.R. Matthews, T.K. Maycock, T. Waterfield, O. Yelekçi, R. Yu, and B. Zhou (eds.)], Cambridge University Press, Cambridge, United Kingdom and New York, NY, USA, pp. 923–1054, doi: 10.1017/9781009157896.009, 2021

Foschi M., Etiopé G., Cartwright J.A.: Seismic evidence of extensive microbial gas migration and trapping in submarine marine hydrates (Rakhine Basin, Bay of Bengal). *Mar. Petrol. Geol.*, 149, 106100, <https://doi.org/10.1016/j.marpetgeo.2023.106100>, 2023

Francey, R. J., Steele, L. P., Langenfelds, R. L. and Pak, B. C.: High precision long-term monitoring of radiatively active and related trace gases at surface sites and from aircraft in the southern hemisphere atmosphere, *J. Atmospheric Sci.*, 56(2), 279–285, 1999.

Frankenberg, C., Meirink, J. F., van Weele, M., Platt, U. and Wagner, T.: Assessing methane emissions from global space-borne observations, *Science*, 308(5724), 1010–1014, 2005.

Fraser, P. J., Rasmussen, R. A., Creffield, J. W., French, J. R. and Khalil, M. A. K.: Termites and global methane – Another assessment, *J. Atmospheric Chem.*, 4, 295–310, 1986.

Fraser, W. T., Blei, E., Fry, S. C., Newman, M. F., Reay, D. S., Smith, K. A. and McLeod, A. R.: Emission of methane, carbon monoxide, carbon dioxide and short-chain hydrocarbons from vegetation foliage under ultraviolet irradiation, *Plant Cell Environ.*, 38(5), 980–989, doi:10.1111/pce.12489, 2015.

Fujita, R., Morimoto, S., Maksyutov, S., Kim, H.-S., Arshinov, M., Brailsford, G., Aoki, S. and Nakazawa, T.: Global and Regional CH<sub>4</sub> Emissions for 1995–2013 Derived From Atmospheric CH<sub>4</sub>, δ<sup>13</sup>C-CH<sub>4</sub>, and δD-CH<sub>4</sub> Observations and a 715 Chemical Transport Model. *J. Geophys. Res. Atmos.*, 125: e2020JD032903,

<https://doi.org/10.1029/2020JD032903>, 2020

Gauci, V., Figueiredo, V., Gedney, N., Pangala, S. R., Stauffer, T., Weedon, G., P. and Enrich-Prast A. Non-flooded riparian Amazon trees are a regionally significant methane source. *Phil. Trans. R. Soc. A*. 3802020044620200446 <http://doi.org/10.1098/rsta.2020.0446>, 2021.

Gedney, N., Huntinford, C., Comyn Platt, E. and Wiltshire, A. Significant feedbacks of wetland methane release on climate change and the causes of their uncertainty. *Env. Res. Letts.* 14, 084027 doi:10.1088/1748-9326/ab2726, 2019.

Gidden, M. J., Riahi, K., Smith, S. J., Fujimori, S., Luderer, G., Kriegler, E., Vuuren, D. P. van, Berg, M. van den, Feng, L., Klein, D., Calvin, K., Doelman, J. C., Frank, S., Fricko, O., Harmsen, M., Hasegawa, T., Havlik, P., Hilaire, J., Hoesly, R., Horing, J., Popp, A., Stehfest, E. and Takahashi, K.: Global emissions pathways under different socioeconomic scenarios for use in CMIP6: a dataset of harmonized emissions trajectories through the end of the century. *Geosci. Model Dev.*, 12(4), 1443–1475, doi:10.5194/gmd-12-1443-2019, 2019.

Giglio, L., Randerson, J. T. and van der Werf, G. R.: Analysis of daily, monthly, and annual burned area using the fourth-generation global fire emissions database (GFED4). *J. Geophys. Res. - Biogeosciences*, 118(1), 317–328, doi:10.1002/jgrg.20042, 2013.

Glagolev, M., Kleptsova, I., Filippov, I., Maksyutov, S. and Machida, T.: Regional methane emission from West Siberia mire landscapes. *Environ. Res. Lett.*, 6(4), 045214, doi:10.1088/1748-9326/6/4/045214, 2011.

Glatthor, N., von Clarmann, T., Funke, B., Garcia-Comas, M., Grabowski, U., Höpfner, M., Kellmann, S., Kiefer, M., Laeng, A., Linden, A., Lopez-Puertas, M., and Stiller, G. P.: IMK/IAA MIPAS retrievals version 8: CH<sub>4</sub> and N<sub>2</sub>O. *EGUsphere* [preprint], <https://doi.org/10.5194/egusphere-2023-919>, 2023.

Global Methane Pledge, Global Methane Pledge website: Pledges, 1 September. <https://www.globalmethanepledge.org/#pledges>. Accessed 28 September 2023, 2023.

Griffiths, K., A. Jeziorski, D. Antoniadis, M. Beaulieu, J.P. Smol, and I. Gregory-Eaves, Pervasive changes in algal indicators since pre-industrial times: A paleolimnological study of changes in primary production and diatom assemblages from ~200 Canadian lakes. *Science of The Total Environment*, 838: p. 155938., 2022.

Grinham, A., M. Dunbabin, D. Gale, and J. Udy, Quantification of ebullitive and diffusive methane release to atmosphere from a water storage. *Atmospheric Environment*, 45(39): p. 7166-7173., 2011.

Gromov, S., Brenninkmeijer, C. A. M. and Jöckel, P.: A very limited role of tropospheric chlorine as a sink of the greenhouse gas methane. *Atmospheric Chem. Phys.*, 18(13), 9831–9843, doi:10.5194/acp-18-9831-2018, 2018.

Guo, M., Fang, S., Liu, S., Liang, M., Wu, H., Yang, L., Li, Z., Liu, P., Zhang, F.: Comparison of atmospheric CO<sub>2</sub>, CH<sub>4</sub>, and CO at two stations in the Tibetan Plateau of China, *Earth Space Sci.*, 7, e2019EA001051, 2020

Gurney, K. R., Law, R. M., Denning, A. S., Rayner, P. J., Pak, B. C., Baker, D., Bousquet, P., Bruhwiler, L., Chen, Y. H., Ciais, P., Fung, I. Y., Heimann, M., John, J., Maki, T., Maksyutov, S., Peylin, P., Prather, M. and Taguchi, S.: Transcom 3 inversion intercomparison: Model mean results for the estimation of seasonal carbon sources and sinks, *Glob.*

Biogeochem. Cycles, 18(1), GB2010, doi:10.1029/2003gb002111, 2004.

Harris, S. A., French, H. M., Heginbottom, J. A., Johnston, G. H., Ladanyi, B., Sego, D. C. and van Everdingen, R. O.: Glossary of permafrost and related ground-ice terms, National Research Council of Canada, Associate Committee on Geotechnical Research, Permafrost Subcommittee., 1988.

Harris, I., Jones, P.D., Osborn, T.J. and Lister, D.H.: Updated high-resolution grids of monthly climatic observations – the CRU TS3.10 Dataset, *Int. J. Climatol.*, 34: 623-642, <https://doi.org/10.1002/joc.3711>, 2014

Harrison, J.A., Y.T. Prairie, S. Mercier-Blais, and C. Soued: Year-2020 Global Distribution and Pathways of Reservoir Methane and Carbon Dioxide Emissions According to the Greenhouse Gas From Reservoirs (G-res) Model. *Global Biogeochemical Cycles* 35(6): p. e2020GB006888, 2021.

Heathcote, A. J., C. T. Filstrup, and J. A. Downing (2013): Watershed sediment losses to lakes accelerating despite agricultural soil conservation efforts, *PLoS One*, 8(1), e53554, doi:10.1371/journal.pone.0053554, 2013

Heděnc, P., Jiménez, J.J., Moradi, J. *et al.*: Global distribution of soil fauna functional groups and their estimated litter consumption across biomes. *Sci Rep* 12, 17362, <https://doi.org/10.1038/s41598-022-21563-z>, 2022

Hmiel, B., Petrenko, V. V., Dyonisius, M. N., Buizert, C., Smith, A. M., Place, P. F., Harth, C., Beaudette, R., Hua, Q., Yang, B., Vimont, I., Michel, S. E., Severinghaus, J. P., Etheridge, D., Bromley, T., Schmitt, J., Faïn, X., Weiss, R. F. and Dlugokencky, E.: Preindustrial 14 CH 4 indicates greater anthropogenic fossil CH 4 emissions, *Nature*, 578(7795), 409–412, doi:10.1038/s41586-020-1991-8, 2020.

Ho, J.C., A.M. Michalak, and N. Pahlevan: Widespread global increase in intense lake phytoplankton blooms since the 1980s. *Nature*, 574(7780): p. 667-670, 2019

Hoesly, R. M., Smith, S. J., Feng, L., Klimont, Z., Janssens-Maenhout, G., Pitkanen, T., Seibert, J. J., Vu, L., Andres, R. J., Bolt, R. M., Bond, T. C., Dawidowski, L., Kholod, N., Kurokawa, J. I., Li, M., Liu, L., Lu, Z., Moura, M. C. P., O'Rourke, P. R. and Zhang, Q.: Historical (1750–2014) anthropogenic emissions of reactive gases and aerosols from the Community Emissions Data System (CEDS), *Geosci Model Dev*, 11(1), 369–408, doi:10.5194/gmd-11-369-2018, 2018.

Höglund-Isaksson, L.: Bottom-up simulations of methane and ethane emissions from global oil and gas systems 1980 to 2012, *Environ. Res. Lett.*, 12(2), 024007, doi:10.1088/1748-9326/aa583e, 2017.

Höglund-Isaksson, L., Thomson, A., Kupiainen, K., Rao, S. and Janssens-Maenhout, G.: Anthropogenic methane sources, emissions and future projections, Chapter 5 in AMAP Assessment 2015: Methane as an Arctic Climate Forcer, p. 39-59, available at <http://www.amap.no/documents/doc/AMAP-Assessment-2015-Methane-as-an-Arctic-climate-forcer/1285>, 2015.

Höglund-Isaksson, L., Gómez-Sanabria, A., Klimont, Z., Rafaj, P., Schöpp, W.: Technical potentials and costs for reducing global anthropogenic methane emissions in the 2050 timeframe -results from the GAINS model, *Environ. Res. Comm.* 2(2), <https://iopscience.iop.org/article/10.1088/2515-7620/ab7457> , 2020

Holgerson, M. A. and Raymond, P. A.: Large contribution to inland water CO<sub>2</sub> and CH<sub>4</sub> emissions from very small ponds, *Nat. Geosci.*, 9(3), 222–226, doi:10.1038/ngeo2654, 2016.

Holmes, C. D., Prather, M. J., Søvde, O. A. and Myhre, G.: Future methane, hydroxyl, and their uncertainties: key climate and emission parameters for future predictions, *Atmospheric Chem. Phys.*, 13(1), 285–302, doi:10.5194/acp-13-285-2013, 2013.

Hopcroft, P. O., P. J. Valdes & D. J. Beerling, (2011). Simulating idealised Dansgaard-Oeschger events and their potential influence on the global methane cycle, *Quaternary Science Reviews*, 30, 3258–3268, doi: 10.1016/j.quascirev.2011.08.01., 2011

Hossaini, R., Chipperfield, M. P., Saiz-Lopez, A., Fernandez, R., Monks, S., Feng, W., Brauer, P. and Glasow, R. von: A global model of tropospheric chlorine chemistry: Organic versus inorganic sources and impact on methane oxidation, *J. Geophys. Res. Atmospheres*, 121(23), 14,271–14,297, doi:10.1002/2016JD025756, 2016.

Houweling, S., Bergamaschi, P., Chevallier, F., Heimann, M., Kaminski, T., Krol, M., Michalak, A. M. and Patra, P.: Global inverse modeling of CH<sub>4</sub> sources and sinks: an overview of methods, *Atmospheric Chem. Phys.*, 17(1), 235–256, doi:10.5194/acp-17-235-2017, 2017.

M. Hovland, A.G. Judd, R.A. Burke: The global flux of methane from shallow submarine sediments, *Chemosphere*, Volume 26, Issues 1–4, Pages 559–578, doi:10.1016/0045-6535(93)90442-8., 1993

Howarth, R. W.: Ideas and perspectives: is shale gas a major driver of recent increase in global atmospheric methane?, *Biogeosciences*, 16(15), 3033–3046, doi:10.5194/bg-16-3033-2019, 2019.

Hu, H., Landgraf, J., Detmers, R., Borsdorff, T., Brugh, J. A. de, Aben, I., Butz, A. and Hasekamp, O.: Toward Global Mapping of Methane With TROPOMI: First Results and Intersatellite Comparison to GOSAT, *Geophys. Res. Lett.*, 45(8), 3682–3689, doi:10.1002/2018GL077259, 2018.

Hugelius, G., Tarnocai, C., Broll, G., Canadell, J. G., Kuhry, P., & Swanson, D. K.: The Northern Circumpolar Soil Carbon Database: spatially distributed datasets of soil coverage and soil carbon storage in the northern permafrost regions. *Earth System Science Data*, 5(1), 3–13, https://doi.org/10.5194/essd-5-3-2013, 2013

Hugelius, G., Strauss, J., Zubrzycki, S., Harden, J. W., Schuur, E. A. G., Ping, C. L., Schirmermeister, L., Grosse, G., Michaelson, G. J., Koven, C. D., O'Donnell, J. A., Elberling, B., Mishra, U., Camill, P., Yu, Z., Palmtag, J. and Kuhry, P.: Estimated stocks of circumpolar permafrost carbon with quantified uncertainty ranges and identified data gaps, *Biogeosciences*, 11(23), 6573–6593, doi:10.5194/bg-11-6573-2014, 2014.

Hugelius, Gustaf, Loisel, J., Chadburn, S., Jackson, R. B., Jones, M., MacDonald, G., et al. : Large stocks of peatland carbon and nitrogen are vulnerable to permafrost thaw. *Proceedings of the National Academy of Sciences*, 117(34), 20438–20446, https://doi.org/10.1073/pnas.1916387117, 2020

Hugelius, G., Ramage, J. L., Burke, E. J., Chatterjee, A., Smallman, T. L., Aalto, T., Bastos, A., Biasi, C., Canadell, J. G., Chandra, N. and Chevallier, F., et al. Two decades of permafrost region CO<sub>2</sub>, CH<sub>4</sub>, and N<sub>2</sub>O budgets suggest a small

net greenhouse gas source to the atmosphere. Preprint in ESS Open Archive. September 11, 2023. DOI: 10.22541/essoar.169444320.01914726/v1, 2023

IEA, *Coal Information: Overview*, IEA, Paris <https://www.iea.org/reports/coal-information-overview>, License: CC BY 4.0, Accessed 17 January 2024, 2021

IEA (2023), *Energy Statistics Data Browser*, IEA, Paris <https://www.iea.org/data-and-statistics/data-tools/energy-statistics-data-browser>, Accessed 17 January 2024, 2023a

IEA, *US natural gas production by source, 2013-2023*, IEA, Paris <https://www.iea.org/data-and-statistics/charts/us-natural-gas-production-by-source-2013-2023>, IEA. Licence: CC BY 4.0, Accessed 17 January 2024, 2023b

Imasu, R.; Matsunaga, T.; Nakajima, M.; Yoshida, Y.; Shiomi, K.; Morino, I.; Saitoh, N.; Niwa, Y.; Someya, Y.; Oishi, Y.; et al. Greenhouse Gases Observing SATellite 2 (GOSAT-2): Mission Overview. *Prog. Earth Planet. Sci.*, *10*, 33, 2023.

Inoue, M., Morino, I., Uchino, O., Nakatsuru, T., Yoshida, Y., Yokota, T., Wunch, D., Wennberg, P. O., Roehl, C. M., Griffith, D. W. T., Velasco, V. A., Deutscher, N. M., Warneke, T., Notholt, J., Robinson, J., Sherlock, V., Hase, F., Blumenstock, T., Rettinger, M., Sussmann, R., Kyrö, E., Kivi, R., Shiomi, K., Kawakami, S., Mazière, M. D., Arnold, S. G., Feist, D. G., Barrow, E. A., Barney, J., Dubey, M., Schneider, M., Iraci, L. T., Podolske, J. R., Hillyard, P. W., Machida, T., Sawa, Y., Tsuboi, K., Matsueda, H., Sweeney, C., Tans, P. P., Andrews, A. E., Biraud, S. C., Fukuyama, Y., Pittman, J. V., Kort, E. A. and Tanaka, T.: Bias corrections of GOSAT SWIR XCO<sub>2</sub> and XCH<sub>4</sub> with TCCON data and their evaluation using aircraft measurement data, *Atmospheric Meas. Tech.*, 9(8), 3491–3512, doi:10.5194/amt-9-3491-2016, 2016.

IPCC: Good Practice Guidance and Uncertainty Management in National Greenhouse Gas Inventories. Intergovernmental Panel on Climate Change, National Greenhouse Gas Inventories Programme. Montreal, IPCC-XVI/Doc.10(1.IV.2000), May 2000., 2000.

IPCC: Climate change 2001: The scientific basis. Contribution of working group I to the third assessment report of the Intergovernmental Panel on Climate Change. Cambridge University Press, Cambridge, United Kingdom and New York, NY, USA., 2001.

IPCC: IPCC Guidelines for National Greenhouse Gas Inventories. The National Greenhouse Gas Inventories Programme, Eggleston H.S., Buendia L., Miwa K., Ngara T. and Tanabe K. (eds). The Intergovernmental Panel on Climate Change, IPCC TSU NGGIP, IGES. Institute for Global Environmental Strategy, Hayama, Kanagawa, Japan. Available online at: [http://www.ipcc-nggip.iges.or.jp/support/Primer\\_2006GLs.pdf](http://www.ipcc-nggip.iges.or.jp/support/Primer_2006GLs.pdf), 2006.

IPCC: 2019 Refinement to the 2006 IPCC Guidelines for National Greenhouse Gas Inventories — IPCC. [online] Available from: <https://www.ipcc.ch/report/2019-refinement-to-the-2006-ipcc-guidelines-for-national-greenhouse-gas-inventories/> (Accessed 17 March 2020), 2019.

Ito, A. and Inatomi, M.: Use of a process-based model for assessing the methane budgets of global terrestrial ecosystems

and evaluation of uncertainty, *Biogeosciences*, 9(2), 759–773, doi:10.5194/bg-9-759-2012, 2012.

Jacob, D. J., Varon, D. J., Cusworth, D. H., Dennison, P. E., Frankenberg, C., Gautam, R., Guanter, L., Kelley, J., McKeever, J., Ott, L. E., Poulter, B., Qu, Z., Thorpe, A. K., Worden, J. R., and Duren, R. M.: Quantifying methane emissions from the global scale down to point sources using satellite observations of atmospheric methane, *Atmos. Chem. Phys.*, 22, 9617–9646, <https://doi.org/10.5194/acp-22-9617-2022>, 2022.

Jackson, R. B., Down, A., Phillips, N. G., Ackley, R. C., Cook, C. W., Plata, D. L. and Zhao, K.: Natural gas pipeline leaks across Washington, D.C, *Environ. Sci. Technol.*, 48(3), 2051–2058, doi:10.1021/es404474x, 2014a.

Jackson, R. B., Vengosh, A., Carey, J. W., Davies, R. J., Darrah, T. H., O’Sullivan, F. and Pétron, G.: The Environmental Costs and Benefits of Fracking, *Annu. Rev. Environ. Resour.*, 39, 327–362, doi:10.1146/annurev-environ-031113-144051, 2014b.

Jackson, R. B., Saunio, M., Bousquet, P., Canadell, J. G., Poulter, B., Stavert, A. R., Poulter, B., Bergamaschi, P., Niwa, Y., Segers, A., Tsuruta, A.: Increasing anthropogenic methane emissions arise equally from agricultural and fossil fuel sources, *Environmental Research Letters*, 15, 7, <https://doi.org/10.1088/1748-9326/ab9ed2>, 2020

Jamali, H., Livesley, S.J., Dawes, T.Z. *et al.* Termite mound emissions of CH<sub>4</sub> and CO<sub>2</sub> are primarily determined by seasonal changes in termite biomass and behaviour. *Oecologia* 167, 525–534, doi.org/10.1007/s00442-011-1991-3, 2011

Janssens-Maenhout, G., Crippa, M., Guizzardi, D., Muntean, M., Schaaf, E., Dentener, F., Bergamaschi, P., Pagliari, V., Olivier, J., Peters, J., van Aardenne, J., Monni, S., Doering, U., Petrescu, R., Solazzo, E. and Oreggioni, G.: EDGAR v4.3.2 Global Atlas of the three major Greenhouse Gas Emissions for the period 1970–2012, *Earth Syst Sci Data Discuss*, 2019, 1–52, doi:10.5194/essd-2018-164, 2019.

JAXA: GOSAT-2: Greenhouse gases Observing SATellite-2@ibuki2\_JAXA"IBUKI-2". [online] Available from: <https://global.jaxa.jp/projects/sat/gosat2/index.html> (Accessed 25 March 2020), 2019.

Jensen, K. and McDonald, K.: Surface Water Microwave Product Series Version 3: A Near-Real Time and 25-Year Historical Global Inundated Area Fraction Time Series From Active and Passive Microwave Remote Sensing, *IEEE Geosci. Remote Sens. Lett.*, 16(9), 1402–1406, doi:10.1109/LGRS.2019.2898779, 2019.

Jiang, Y., Groenigen, K. J. van, Huang, S., Hungate, B. A., Kessel, C. van, Hu, S., Zhang, J., Wu, L., Yan, X., Wang, L., Chen, J., Hang, X., Zhang, Y., Horwath, W. R., Ye, R., Linquist, B. A., Song, Z., Zheng, C., Deng, A. and Zhang, W.: Higher yields and lower methane emissions with new rice cultivars, *Glob. Change Biol.*, 23(11), 4728–4738, doi:10.1111/gcb.13737, 2017.

Johnson, D. E., Phetteplace, H. W. and Seidl, A. F.: Methane, nitrous oxide and carbon dioxide emissions from ruminant livestock production systems, edited by J. Takahashi and B. A. Young, pp. 77–85, Elsevier, Amsterdam, The Netherlands., 2002.

Johnson, M.S., E. Matthews, J. Du, V. Genovese, and D. Bastviken, Methane Emission From Global Lakes: New



Spatiotemporal Data and Observation-Driven Modeling of Methane Dynamics Indicates Lower Emissions, *Journal of Geophysical Research: Biogeosciences*, 127(7): p. e2022JG006793, 2022

Johnson, M. S., E. Matthews, D. Bastviken, B. Deemer, J. Du, and V. Genovese, Spatiotemporal methane emission from global reservoirs, *Journal of Geophysical Research: Biogeosciences*, 126, e2021JG006305, <https://doi.org/10.1029/2021JG006305>, 2021

Judd, A.G. (2004). Natural seabed seeps as sources of atmospheric methane, *Environ. Geol.*, 46, 988–996, 2004.

Jung, M., Reichstein, M., Margolis, H. A., Cescatti, A., Richardson, A. D., Arain, M. A., Arneth, A., Bernhofer, C., Bonal, D., Chen, J., Gianelle, D., Gobron, N., Kiely, G., Kutsch, W., Lasslop, G., Law, B. E., Lindroth, A., Merbold, L., Montagnani, L., Moors, E. J., Papale, D., Sottocornola, M., Vaccari, F., and Williams, C.: Global patterns of land-atmosphere fluxes of carbon dioxide, latent heat, and sensible heat derived from eddy covariance, satellite, and meteorological observations, *J. Geophys. Res.*, 116, G00J07, <https://doi.org/10.1029/2010jg001566>, 2011.

Kai, F. M., Tyler, S. C., Randerson, J. T. and Blake, D. R.: Reduced methane growth rate explained by decreased Northern Hemisphere microbial sources, *Nature*, 476(7359), 194–197, 2011.

Kaiser, J. W., Heil, A., Andreae, M. O., Benedetti, A., Chubarova, N., Jones, L., Morcrette, J. J., Razinger, M., Schultz, M. G., Suttie, M. and van der Werf, G. R.: Biomass burning emissions estimated with a global fire assimilation system based on observed fire radiative power, *Biogeosciences*, 9(1), 527–554, doi:10.5194/bg-9-527-2012, 2012.

Kallingal, J. T., Lindström, J., Miller, P. A., Rinne, J., Raivonen, M., and Scholze, M.: Optimising CH<sub>4</sub> simulations from the LPJ-GUESS model v4.1 using an adaptive MCMC algorithm, *Geosci. Model Dev. Discuss.* [preprint], <https://doi.org/10.5194/gmd-2022-302>, in review, 2023.

Karion, A., Sweeney, C., Pétron, G., Frost, G., Michael Hardesty, R., Kofler, J., Miller, B. R., Newberger, T., Wolter, S., Banta, R., Brewer, A., Dlugokencky, E., Lang, P., Montzka, S. A., Schnell, R., Tans, P., Trainer, M., Zamora, R. and Conley, S.: Methane emissions estimate from airborne measurements over a western United States natural gas field, *Geophys. Res. Lett.*, 40(16), 4393–4397, doi:10.1002/grl.50811, 2013.

Karl, D., Beversdorf, L., Björkman, K. *et al.* Aerobic production of methane in the sea. *Nature Geosci* 1, 473–478, <https://doi.org/10.1038/ngeo234>, 2008

Karlson, M., and Bastviken, D.: Multi-Source Mapping of Peatland Types Using Sentinel-1, Sentinel-2, and Terrain Derivatives—A Comparison Between Five High-Latitude Landscapes, *Journal of Geophysical Research: Biogeosciences* 128, e2022JG007195, <https://doi.org/10.1029/2022JG007195>, 2023

Keppler, F., Hamilton, J. T. G., Brass, M. and Rockmann, T.: Methane emissions from terrestrial plants under aerobic conditions, *Nature*, 439, 187–191, doi:10.1038/nature04420, 2006.

Kholod, N., Evans, M., Pilcher, R. C., Roshchanka, V., Ruiz, F., Coté, M. and Collings, R.: Global methane emissions from coal mining to continue growing even with declining coal production, *J. Clean. Prod.*, 256, 120489, doi:10.1016/j.jclepro.2020.120489, 2020.

Kim H., Global Soil Wetness Project Phase 3 Atmospheric Boundary Conditions (Experiment 1) [Data set]. Data Integration and Analysis System (DIAS)., <https://doi.org/10.20783/DIAS.501>, 2017

King, J.R., Warren, R.J., Bradford, M.A. Correction: Social Insects Dominate Eastern US Temperate Hardwood Forest Macroinvertebrate Communities in Warmer Regions. *PLOS ONE* 8(10): 10.1371/annotation/87285c86-f1df-4f8b-bc08-d64643d351f4, 2013.

Kirk, L. and MJ Cohen: River Corridor Sources Dominate CO<sub>2</sub> Emissions From a Lowland River Network. *Journal of Geophysical Research, Biogeosciences*, 128(1), e2022JG006954, 2023.

Kirschke, S., Bousquet, P., Ciais, P., Saunois, M., Canadell, J. G., Dlugokencky, E. J., Bergamaschi, P., Bergmann, D., Blake, D. R., Bruhwiler, L., Cameron-Smith, P., Castaldi, S., Chevallier, F., Feng, L., Fraser, A., Heimann, M., Hodson, E. L., Houweling, S., Josse, B., Fraser, P. J., Krummel, P. B., Lamarque, J. F., Langenfelds, R. L., Le Quere, C., Naik, V., O'Doherty, S., Palmer, P. I., Pison, I., Plummer, D., Poulter, B., Prinn, R. G., Rigby, M., Ringeval, B., Santini, M., Schmidt, M., Shindell, D. T., Simpson, I. J., Spahni, R., Steele, L. P., Strobe, S. A., Sudo, K., Szopa, S., van der Werf, G. R., Voulgarakis, A., van Weele, M., Weiss, R. F., Williams, J. E. and Zeng, G.: Three decades of global methane sources and sinks. *Nat. Geosci.*, 6(10), 813–823, doi:10.1038/ngeo1955, 2013.

Klauda, J. B. and Sandler, S. I.: Global distribution of methane hydrate in ocean sediment. *Energy Fuels*, 19(2), 459–470, 2005.

Kleinen, T., Brovkin, V. and Schuldt, R. J.: A dynamic model of wetland extent and peat accumulation: results for the Holocene. *Biogeosciences*, 9(1), 235–248, doi:10.5194/bg-9-235-2012, 2012.

Kleinen, T., Mikolajewicz, U., and Brovkin, V.: Terrestrial methane emissions from the Last Glacial Maximum to the preindustrial period. *Clim. Past*, 16, 575–595, doi:10.5194/cp-16-575-2020, 2020.

Kleinen, T., Gromov, S., Steil, B., and Brovkin, V.: Atmospheric methane underestimated in future climate projections. *Environ. Res. Lett.*, 16, 094006, doi:10.1088/1748-9326/ac1814, 2021.

Kleinen, T., Gromov, S., Steil, B., and Brovkin, V.: Atmospheric methane since the last glacial maximum was driven by wetland sources. *Clim. Past*, 19, 1081–1099, doi:10.5194/cp-19-1081-2023, 2023

Knittel K and Boetius A : Anaerobic oxidation of methane: progress with an unknown process methane. *Annu Rev Microbiol* 63:311–334, 2009

Knox, S. H., Jackson, R. B., Poulter, B., McNicol, G., Fluet-Chouinard, E., Zhang, Z., Hugelius, G., Bousquet, P., Canadell, J. G., Saunois, M., Papale, D., Chu, H., Keenan, T. F., Baldocchi, D., Torn, M. S., Mammarella, I., Trotta, C., Aurela, M., Bohrer, G., Campbell, D. I., Cescatti, A., Chamberlain, S., Chen, J., Chen, W., Dengel, S., Desai, A. R., Euskirchen, E., Friborg, T., Gasbarra, D., Goded, I., Goeckede, M., Heimann, M., Helbig, M., Hirano, T., Hollinger, D. Y., Iwata, H., Kang, M., Klatt, J., Krauss, K. W., Kutzbach, L., Lohila, A., Mitra, B., Morin, T. H., Nilsson, M. B., Niu, S., Noormets, A., Oechel, W. C., Peichl, M., Peltola, O., Reba, M. L., Richardson, A. D., Runkle, B. R. K., Ryu, Y., Sachs, T., Schäfer, K. V. R., Schmid, H. P., Shurpali, N., Sonnentag, O., Tang, A. C. I., Ueyama, M., Vargas, R.,

Vesala, T., Ward, E. J., Windham-Myers, L., Wohlfahrt, G. and Zona, D.: FLUXNET-CH<sub>4</sub> Synthesis Activity: Objectives, Observations, and Future Directions, *Bull. Am. Meteorol. Soc.*, 100(12), 2607–2632, doi:10.1175/BAMS-D-18-0268.1, 2019.

Knox, S. H., Bansal, S., McNicol, G., Schafer, K., Sturtevant, C., Ueyama, M., et al.: Identifying dominant environmental predictors of freshwater wetland methane fluxes across diurnal to seasonal time scales. *Global Change Biology*, 27(15), 3582–3604. <https://doi.org/10.1111/gcb.15661>, 2021

Kretschmer, K., Biastoch, A., Rüpke, L. and Burwicz, E.: Modeling the fate of methane hydrates under global warming, *Glob. Biogeochem Cycles*, 29(5), 610–625, doi:1002/2014GB005011, 2015.

Kuhn, M.A., Varner, R.K., Bastviken, D., Crill, P., MacIntyre, S., Turetsky, M., Walter Anthony, K., McGuire, A.D., and Olefeldt, D. (2021). BAWLD-CH<sub>4</sub>: a comprehensive dataset of methane fluxes from boreal and arctic ecosystems. *Earth Syst. Sci. Data* 13, 5151-5189. 10.5194/essd-13-5151-2021.

Kuze A, Kikuchi N, Kataoka F, Suto H, Shiomi K, Kondo Y. Detection of Methane Emission from a Local Source Using GOSAT Target Observations. *Remote Sensing*. 12(2):267. <https://doi.org/10.3390/rs12020267>. 2020

Kyzivat, E.D., L.C. Smith, F. Garcia-Tigueros, C. Huang, C. Wang, T. Langhorst, J.V. Fayne, M.E. Harlan, Y. Ishitsuka, D. Feng, W. Dolan, L.H. Pitcher, K.P. Wickland, M.M. Domblaser, R.G. Striegl, T.M. Pavelsky, D.E. Butman, and C.J. Gleason, The Importance of Lake Emergent Aquatic Vegetation for Estimating Arctic-Boreal Methane Emissions, *Journal of Geophysical Research: Biogeosciences* 127(6): p. e2021JG006635, 2022.

Lamarque, J. F., Shindell, D. T., Josse, B., Young, P. J., Cionni, I., Eyring, V., Bergmann, D., Cameron-Smith, P., Collins, W. J., Doherty, R., Dalsoren, S., Faluvegi, G., Folberth, G., Ghan, S. J., Horowitz, L. W., Lee, Y. H., MacKenzie, I. A., Nagashima, T., Naik, V., Plummer, D., Righi, M., Rumbold, S. T., Schulz, M., Skeie, R. B., Stevenson, D. S., Stroe, S., Sudo, K., Szopa, S., Voulgarakis, A. and Zeng, G.: The Atmospheric Chemistry and Climate Model Intercomparison Project (ACCMIP): overview and description of models, simulations and climate diagnostics, *Geosci. Model Dev.*, 6(1), 179–206, doi:10.5194/gmd-6-179-2013, 2013.

Lamb, B. K., Edburg, S. L., Ferrara, T. W., Howard, T., Harrison, M. R., Kolb, C. E., Townsend-Small, A., Dyck, W., Possolo, A. and Whetstone, J. R.: Direct Measurements Show Decreasing Methane Emissions from Natural Gas Local Distribution Systems in the United States, *Environ. Sci. Technol.*, 49(8), 5161–5169, doi:10.1021/es505116p, 2015.

Lan, X., K.W. Thoning, and E.J. Dlugokencky: Trends in globally-averaged CH<sub>4</sub>, N<sub>2</sub>O, and SF<sub>6</sub> determined from NOAA Global Monitoring Laboratory measurements. Version 2024-02, <https://doi.org/10.15138/P8XG-AA10>, 2024

Lange S., WFDE5 over land merged with ERA5 over the ocean (WSE5). V. 1.0. 2019. doi:10.5880/pik.2019.023, 2019

Laruelle, G. G., Dürr, H. H., Lauerwald, R., Hartmann, J., Slomp, C. P., Goossens, N. and Regnier, P. A. G.: Global multi-scale segmentation of continental and coastal waters from the watersheds to the continental margins, *Hydrol. Earth Syst. Sci.*, 17(5), 2029–2051, doi:10.5194/hess-17-2029-2013, 2013.

6418 [Laruelle, G. G., Rosentreter, J. A. & Regnier P.: Extrapolation based regionalized re-evaluation of the global estuarine](#)  
6419 [surface area. Preprint at Earth ArXiv <https://doi.org/10.31223/X5X664>, 2023.](#)

6420 [Lassey, K. R., Etheridge, D. M., Lowe, D. C., Smith, A. M. and Ferretti, D. F.: Centennial evolution of the atmospheric](#)  
6421 [methane budget: what do the carbon isotopes tell us?, \*Atmospheric Chem. Phys.\*, 7\(8\), 2119–2139, 2007a.](#)

6422 [Lassey, K. R., Lowe, D. C. and Smith, A. M.: The atmospheric cycling of radiomethane and the “fossil fraction” of the](#)  
6423 [methane source, \*Atmospheric Chem. Phys.\*, 7\(8\), 2141–2149, 2007b.](#)

6424 [Lauerwald, R., Allen, G.H., Deemer, B.R., Liu, S., Maavara, T., Raymond, P., Alcott, L., Bastviken, D., Hastie, A.,](#)  
6425 [Holgerson, M.A., Johnson, M.S., Lehner, B., Lin, P., Marzadri, A., Ran, L., Tian, H., Yang, X., Yao, Y. and Regnier,](#)  
6426 [P. Inland water greenhouse gas budgets for RECCAP2: 1. State-of- the-art of global scale assessments. \*Global\*](#)  
6427 [Biogeochemical Cycles](#), 37, e2022GB007657. <https://doi.org/10.1029/2022GB007657>, 2023a.

6428 [Lauerwald, R., Allen, G.H., Deemer, B.R., Liu, S., Maavara, T., Raymond, P., Alcott, L., Bastviken, D., Hastie, A.,](#)  
6429 [Holgerson, M.A., Johnson, M.S., Lehner, B., Lin, P., Marzadri, A., Ran, L., Tian, H., Yang, X., Yao, Y. and Regnier,](#)  
6430 [P. Inland water greenhouse gas budgets for RECCAP2: 2 Regionalization and homogenization of estimates following](#)  
6431 [the RECCAP2 framework, \*Global Biogeochemical Cycles\*, 37, e2022GB007658. \[https://doi.\]\(https://doi.org/10.1029/2022GB007658\)](#)  
6432 [org/10.1029/2022GB007658](#), 2023b.

6433 [Laughner, J. L., Neu, J. L., Schimel, D., Wennberg, P. O., Barsanti, K., Bowman, K. W., Chatterjee, A., Croes, B. E.,](#)  
6434 [Fitzmaurice, H. L., Henze, D. K., Kim, J., Kort, E. A., Liu, Z., Miyazaki, K., Turner, A. J., Anenberg, S., Avise, J.,](#)  
6435 [Cao, H., Crisp, D., de Gouw, J., Eldering, A., Fyfe, J. C., Goldberg, D. L., Gurney, K. R., Hasheminassab, S., Hopkins,](#)  
6436 [F., Ivey, C. E., Jones, D. B. A., Liu, J., Lovenduski, N. S., Martin, R. V., McKinley, G. A., Ott, L., Poulter, B., Ru, M.,](#)  
6437 [Sander, S. P., Swart, N., Yung, Y. L., and Zeng, Z.-C.: Societal shifts due to COVID-19 reveal large-scale complexities](#)  
6438 [and feedbacks between atmospheric chemistry and climate change, \*P. Natl. Acad. Sci. USA\*, 118, e2109481118,](#)  
6439 [https://doi.org/10.1073/pnas.2109481118](#), 2021.

6440 [Lauvaux, T., Giron, C., Mazzolini, M., d’Aspremont, A., Duren, R., Cusworth, D., Shindell, D., and Ciais, P.: Global](#)  
6441 [assessment of oil and gas methane ultra-emitters, \*Science\*, 375, 557–561, <https://doi.org/10.1126/science.abj4351>,](#)  
6442 [2022.](#)

6443 [Lelieveld, J., Crutzen, P. J. and Dentener, F. J.: Changing concentration, lifetime and climate forcing of atmospheric](#)  
6444 [methane, \*Tellus Ser. B-Chem. Phys. Meteorol.\*, 50\(2\), 128–150, doi:10.1034/j.1600-0889.1998.t01-1-00002.x, 1998.](#)

6445 [Lelieveld, J., Lechtenbohrer, S., Assonov, S. S., Brenninkmeijer, C. A. M., Dienst, C., Fischedick, M. and Hanke, T.:](#)  
6446 [Greenhouse gases: Low methane leakage from gas pipelines, \*Nature\*, 434\(7035\), 841–842, doi:10.1038/434841a, 2005.](#)

6447 [Lenhart, K., Klintzsch, T., Langer, G., Nehrke, G., Bunge, M., Schnell, S. and Keppler, F.: Evidence for methane](#)  
6448 [production by the marine algae \*Emiliania huxleyi\*, \*Biogeosciences\*, 13\(10\), 3163–3174, doi:10.5194/bg-13-3163-2016,](#)  
6449 [2016.](#)

6450 [Lewan, M. D.: Comment on Ideas and perspectives: is shale gas a major driver of recent increase in global atmospheric](#)

methane? by Robert W. Howarth (2019). *Biogeosciences Discuss.*, 1–10, doi:10.5194/bg-2019-419, 2020.

Li, C., Frolking, S., Xiao, X., Moore, B., Boles, S., Qiu, J., Huang, Y., Salas, W. and Sass, R.: Modeling impacts of farming management alternatives on CO<sub>2</sub>, CH<sub>4</sub>, and N<sub>2</sub>O emissions: A case study for water management of rice agriculture of China, *Glob. Biogeochem. Cycles*, 19(3), doi:10.1029/2004gb002341, 2005.

Li T, Huang Y, Zhang W, Song C: CH4MODwetland: A biogeophysical model for simulating methane emissions from natural wetlands. *Ecological Modelling* 221: 666–680, 2010.

Li, Y., J. Shang, C. Zhang, W. Zhang, L. Niu, L. Wang, and H. Zhang, The role of freshwater eutrophication in greenhouse gas emissions: A review. *Science of The Total Environment*, 768: p. 144582., 2021

Lin, X., Indira, N. K., Ramonet, M., Delmotte, M., Ciais, P., Bhatt, B. C., Reddy, M. V., Angchuk, D., Balakrishnan, S., Jorphaill, S., Dorjai, T., Mahey, T. T., Patnaik, S., Begum, M., Brenninkmeijer, C., Durairaj, S., Kirubakaran, R., Schmidt, M., Swathi, P. S., Vinithkumar, N. V., Yver Kwok, C. and Gaur, V. K.: Long-lived atmospheric trace gases measurements in flask samples from three stations in India, *Atmospheric Chem. Phys.*, 15(17), 9819–9849, doi:10.5194/acp-15-9819-2015, 2015.

Lin, P., Pan, M., Beck, H. E., Yang, Y., Yamazaki, D., Frasson, R., et al.: Global reconstruction of naturalized river flows at 2.94 million reaches. *Water Resources Research*, 55, 6499–6516. <https://doi.org/10.1029/2019WR025287>, 2019

Liu, Z., Guan, D., Wei, W., Davis, S. J., Ciais, P., Bai, J., Peng, S., Zhang, Q., Hubacek, K., Marland, G., Andres, R. J., Crawford-Brown, D., Lin, J., Zhao, H., Hong, C., Boden, T. A., Feng, K., Peters, G. P., Xi, F., Liu, J., Li, Y., Zhao, Y., Zeng, N. and He, K.: Reduced carbon emission estimates from fossil fuel combustion and cement production in China, *Nature*, 524(7565), 335–338, doi:10.1038/nature14677, 2015.

Liu, G., Peng, S., Lin, X., Ciais, P., Li, X., Xi, Y., Lu, Z., Chang, J., Sauniois, M., Wu, Y., Patra, P., Chandra, N., Zeng, H., and Piao, S.: Recent Slowdown of Anthropogenic Methane Emissions in China Driven by Stabilized Coal Production, *Environ. Sci. Technol. Lett.*, 8, 739–746, <https://doi.org/10.1021/acs.estlett.1c00463>, 2021a.

Liu, S., Fang, S., Liu, P., Liang, M., Guo, M., and Feng, Z.: Measurement report: Changing characteristics of atmospheric CH<sub>4</sub> in the Tibetan Plateau: records from 1994 to 2019 at the Mount Waliguan station, *Atmos. Chem. Phys.*, 21, 393–413, <https://doi.org/10.5194/acp-21-393-2021>, 2021b

Liu, S., C. Kuhn, G. Amatulli, K. Aho, D.E. Butman, G.H. Allen, P. Lin, M. Pan, D. Yamazaki, C. Brinkerhoff, C. Gleason, X. Xia, and P.A. Raymond: The importance of hydrology in routing terrestrial carbon to the atmosphere via global streams and rivers. *Proceedings of the National Academy of Sciences*, 119(11): p. e2106322119, 2022.

Lloret, Z., Chevallier, F., Cozic, A., Remaud, M., and Meurdesoif, Y.: Simulating the variations of carbon dioxide in the global atmosphere on the hexagonal grid of DYNAMICO coupled with the LMDZ6 model, *Geosci. Model Dev. Discuss.* [preprint], <https://doi.org/10.5194/gmd-2023-140>, in review, 2023.

Locatelli, R., Bousquet, P., Sauniois, M., Chevallier, F. and Cressot, C.: Sensitivity of the recent methane budget to LMDz

sub-grid-scale physical parameterizations, *Atmospheric Chem. Phys.*, 15(17), 9765–9780, doi:10.5194/acp-15-9765-2015, 2015.

Lohila, A., Aalto, T., Aurela, M., Hatakka, J., Tuovinen, J.-P., Kilkki, J., Penttilä, T., Vuorenmaa, J., Hänninen, P., Sutinen, R., Viisanen, Y. and Laurila, T.: Large contribution of boreal upland forest soils to a catchment-scale CH<sub>4</sub> balance in a wet year, *Geophys. Res. Lett.*, 43(6), 2946–2953, doi:10.1002/2016gl067718, 2016.

Lorente, A., Borsdorff, T., Martinez-Velarte, M. C., and Landgraf, J.: Accounting for surface reflectance spectral features in TROPOMI methane retrievals, *Atmos. Meas. Tech.*, 16, 1597–1608, <https://doi.org/10.5194/amt-16-1597-2023>, 2023.

Lu, X., Jacob, D. J., Zhang, Y., Maasakkers, J. D., Sulprizio, M. P., Shen, L., Qu, Z., Scarpelli, T. R., Nesser, H., Yantosca, R. M., Sheng, J., Andrews, A., Parker, R. J., Boesch, H., Bloom, A. A., and Ma, S.: Global methane budget and trend, 2010–2017: complementarity of inverse analyses using in situ (GLOBALVIEWplus CH<sub>4</sub> ObsPack) and satellite (GOSAT) observations, *Atmos. Chem. Phys.*, 21, 4637–4657, <https://doi.org/10.5194/acp-21-4637-2021>, 2021.

Lu, X., Jacob, D. J., Zhang, Y., Maasakkers, J. D., Zhang, Y., Qu, Z., Chen, Z., Sulprizio, M. P., Varon, D., Hmiel, H., Park, R. J., Boesch, H., and Fan, S.: Observation-derived 2010–2019 trends in methane emissions and intensities from US oil and gas fields tied to activity metrics, *P. Natl. Acad. Sci. USA*, 120, e2217900120, <https://doi.org/10.1073/pnas.2217900120>, 2023.

Maasakkers, J. D., Jacob, D. J., Sulprizio, M. P., Scarpelli, T. R., Nesser, H., Sheng, J.-X., Zhang, Y., Hersher, M., Bloom, A. A., Bowman, K. W., Worden, J. R., Janssens-Maenhout, G., and Parker, R. J.: Global distribution of methane emissions, emission trends, and OH concentrations and trends inferred from an inversion of GOSAT satellite data for 2010–2015, *Atmos. Chem. Phys.*, 19, 7859–7881, <https://doi.org/10.5194/acp-19-7859-2019>, 2019.

Maasakkers, J. D., Jacob, D. J., Sulprizio, M. P., Scarpelli, T. R., Nesser, H., Sheng, J., Zhang, Y., Lu, X., Bloom, A. A., Bowman, K. W., Worden, J. R., and Parker, R. J.: 2010–2015 North American methane emissions, sectoral contributions, and trends: a high-resolution inversion of GOSAT observations of atmospheric methane, *Atmos. Chem. Phys.*, 21, 4339–4356, <https://doi.org/10.5194/acp-21-4339-2021>, 2021.

Maavara, T., Lauerwald, R., Regnier, P. and Van Capellen P.: Global perturbation of organic carbon cycling by river damming, *Nat Commun* 8, 153, <https://doi.org/10.1038/ncomms15347>, 2017.

Machida, T., H. Matsueda, Y. Sawa, Y. Nakagawa, K. Hirotani, N. Kondo, K. Goto, N. Nakazawa, K. Ishikawa and T. Ogawa: Worldwide measurements of atmospheric CO<sub>2</sub> and other trace gas species using commercial airlines, *J. Atmos. Oceanic Technol.*, 25(10), 1744–1754, doi:10.1175/2008JTECHA1082.1, 2008.

Maksyutov, S., Oda, T., Saito, M., Janardanan, R., Belikov, D., Kaiser, J. W., Zhuravlev, R., Ganshin, A., Valsala, V. K., Andrews, A., Chmura, L., Dlugokencky, E., Haszpra, L., Langenfelds, R. L., Machida, T., Nakazawa, T., Ramonet, M., Sweeney, C. and Worthy, D.: Technical note: A high-resolution inverse modelling technique for estimating surface CO<sub>2</sub> fluxes based on the NIES-TM & FLEXPART coupled transport model and its adjoint, *Atmospheric Chem.*



Phys. Discuss., 1–33, doi:10.5194/acp-2020-251, 2020.

Malerba, M.E., T. de Kluyver, N. Wright, L. Schuster, and P.I. Macreadie: Methane emissions from agricultural ponds are underestimated in national greenhouse gas inventories. *Communications Earth & Environment*, 3(1): p. 306, 2022

Maltby, J., L. Steinle, C. R. Löschner, H. W. Bange, M. A. Fischer, M. Schmidt, and T. Treude: Microbial methanogenesis in the sulfate-reducing zone of sediments in the Eckernförde Bay, SW Baltic Sea. *Biogeosciences* **15**: 137–157, doi:10.5194/bg-15-137-2018, 2018

Manning, F. C., Kho, L. K., Hill, T. C., Cornulier, T., and Teh, Y. A: Carbon Emissions From Oil Palm Plantations on Peat Soil. *Front. For. Glob. Change, Sec. Tropical Forests, Volume 2*, <https://doi.org/10.3389/ffgc.2019.0003>, 2019

Mannisenaho V, Tsuruta A, Backman L, Houweling S, Segers A, Krol M, Saunio M, Poulter B, Zhang Z, Lan X, et al. Global Atmospheric  $\delta^{13}\text{CH}_4$  and  $\text{CH}_4$  Trends for 2000–2020 from the Atmospheric Transport Model TM5 Using  $\text{CH}_4$  from Carbon Tracker Europe– $\text{CH}_4$  Inversions. *Atmosphere*, 14(7):1121. <https://doi.org/10.3390/atmos14071121>, 2023

van Marle, M. J. E., Kloster, S., Magi, B. I., Marlon, J. R., Daniau, A.-L., Field, R. D., Arneth, A., Forrest, M., Hantson, S., Kehrwald, N. M., Knorr, W., Lasslop, G., Li, F., Mangeon, S., Yue, C., Kaiser, J. W. and Werf, G. R. van der: Historic global biomass burning emissions for CMIP6 (BB4CMIP) based on merging satellite observations with proxies and fire models (1750–2015). *Geosci. Model Dev.*, 10(9), 3329–3357, doi:10.5194/gmd-10-3329-2017, 2017.

Martinez, A., Saunio, M., Poulter, B., Zhen, Z., Raymond, P., Regnier, P., Canadell, J. G., Jackson, R. B., Patra, P. K., Bousquet, P., Ciais, P., Dlugokencky, E.J., Lan, X., Allen, G., Bastviken, D., Beerling, D. J., Belikov, D., Blake, D., Castaldi, S., Crippa, M., Deemer, B.R., Dennison, F., Etiope, G., Gedney, N., Höglund-Isaksson, L., Holgersson, M.A., Hopcroft, P. O., Hugelius, G., Ito, A., Jain, A. K., Janardanan, R., Johnson, M. S., Kleinen, T., Krummel, P. B., Lauerwald, R., Li, T., Liu, X., McDonald, K. C., Melton, J. R., Mühle, J., Müller, J., Murguía-Flores, F., Niwa, Y., Noce, S., Pan, S., Parker, R. J., Peng, C., Ramonet, M., Riley, W. J., Rocher-Ros, G., Rosentreter, J. A., Sasakawa, M., Segers, A., Smith, S. J., Stanley, E. H., Thanwerdas, J., Tian, H., Tsuruta, A., Tubiello, F. N., Weber, T. S., van der Werf, G. R., Worthy, D. E. J., Xi, Y., Yoshida Y., Zhang, W., Zheng, B., Zhu, Qing, Zhu, Qian, and Zhuang, Q.: *Supplemental data of the Global Carbon Project Methane Budget 2024 v1*. [Data set], <https://doi.org/10.18160/GCP-CH4-2024/>, 2024

Matthews, E. and Fung, I.: Methane emission from natural wetlands: Global distribution, area, and environmental characteristics of sources, *Glob. Biogeochem. Cycles*, 1(1), 61–86, doi:10.1029/GB001i001p00061, 1987.

Mazzini, A., Etiope, G. (2017). Mud volcanism: an updated review. *Earth Sci. Rev.*, 168, 81–112. <http://dx.doi.org/10.1016/j.earscirev.2017.03.001>, 2017

McCalley, C. K., Woodcroft, B. J., Hodgkins, S. B., Wehr, R. A., Kim, E.-H., Mondav, R., Crill, P. M., Chanton, J. P., Rich, V. I., Tyson, G. W. and Saleska, S. R.: Methane dynamics regulated by microbial community response to permafrost thaw, *Nature*, 514(7523), 478–481, doi:10.1038/nature13798, 2014.

McCarthy, M. C., Boering, K. A., Rice, A. L., Tyler, S. C., Connell, P. and Atlas, E.: Carbon and hydrogen isotopic

compositions of stratospheric methane: 2. Two-dimensional model results and implications for kinetic isotope effects, *J. Geophys. Res. Atmospheres*, 108(D15), doi:10.1029/2002JD003183, 2003.

McGinnis, D. F., J. Greinert, Y. Artemov, S. E. Beaubien, and A. Wüest: Fate of rising methane bubbles in stratified waters: How much methane reaches the atmosphere?, *J. Geophys. Res.*, 111, C09007, doi:10.1029/2005JC003183, 2006.

McGuire, A. D., Christensen, T. R., Heroult, A., Miller, P. A., Hayes, D., Euskirchen, E., Kimball, J. S., Yi, Y., Koven, C., Lafleur, P., Oechel, W., Peylin, P. and Williams, M.: An assessment of the carbon balance of Arctic tundra, *Comp. Obs. Process Models Atmospheric Inversions*, 9(Article), 3185–3204, doi:10.5194/bg-9-3185-2012, 2012.

McKain, K., Down, A., Raciti, S. M., Budney, J., Hutyrá, L. R., Floerchinger, C., Herndon, S. C., Nehrkorn, T., Zahniser, M. S., Jackson, R. B., Phillips, N. and Wofsy, S. C.: Methane emissions from natural gas infrastructure and use in the urban region of Boston, Massachusetts, *Proc. Natl. Acad. Sci.*, 112(7), 1941–1946, doi:10.1073/pnas.1416261112, 2015.

McNicol, G., Fluet-Chouinard, E., Ouyang, Z., Knox, S., Zhang, Z., Aalto, T., et al.: Upscaling wetland methane emissions from the FLUXNET-CH<sub>4</sub> eddy covariance network (UpCH<sub>4</sub> v1.0): Model development, network assessment, and budget comparison. *AGU Advances*, 4, e2023AV000956. <https://doi.org/10.1029/2023AV000956>, 2023.

Meinshausen, M., Smith, S., Calvin, K., Daniel, J., Kainuma, M., Lamarque, J. F., Matsumoto, K., Montzka, S., Raper, S., Riahi, K., Thomson, A., Velders, G. and van Vuuren, D. P.: The RCP greenhouse gas concentrations and their extensions from 1765 to 2300, *Clim. Change*, 109(1), 213–241, doi:10.1007/s10584-011-0156-z, 2011.

Meinshausen, M., Vogel, E., Nauels, A., Lorbacher, K., Meinshausen, N., Etheridge, D. M., Fraser, P. J., Montzka, S. A., Rayner, P. J., Trudinger, C. M., Krummel, P. B., Beyerle, U., Canadell, J. G., Daniel, J. S., Enting, I. G., Law, R. M., Lunder, C. R., O'Doherty, S., Prinn, R. G., Reimann, S., Rubino, M., Velders, G. J. M., Vollmer, M. K., Wang, R. H. J., and Weiss, R.: Historical greenhouse gas concentrations for climate modelling (CMIP6), *Geosci. Model Dev.*, 10, 2057–2116, <https://doi.org/10.5194/gmd-10-2057-2017>, 2017.

Meinshausen, M., Nicholls, Z. R. J., Lewis, J., Gidden, M. J., Vogel, E., Freund, M., Beyerle, U., Gessner, C., Nauels, A., Bauer, N., Canadell, J. G., Daniel, J. S., John, A., Krummel, P. B., Luderer, G., Meinshausen, N., Montzka, S. A., Rayner, P. J., Reimann, S., Smith, S. J., van den Berg, M., Velders, G. J. M., Vollmer, M. K., and Wang, R. H. J.: The shared socio-economic pathway (SSP) greenhouse gas concentrations and their extensions to 2500, *Geosci. Model Dev.*, 13, 3571–3605, <https://doi.org/10.5194/gmd-13-3571-2020>, 2020.

Melton, J. R. and Arora, V. K.: Competition between plant functional types in the Canadian Terrestrial Ecosystem Model (CTEM) v. 2.0, *Geosci. Model Dev.*, 9(1), 323–361, doi:10.5194/gmd-9-323-2016, 2016.

Melton, J. R., Wania, R., Hodson, E. L., Poulter, B., Ringeval, B., Spahni, R., Bohn, T., Avis, C. A., Beerling, D. J., Chen, G., Eliseev, A. V., Denisov, S. N., Hopcroft, P. O., Lettenmaier, D. P., Riley, W. J., Singarayer, J. S., Subin, Z. M.,

Tian, H., Zürcher, S., Brovkin, V., van Bodegom, P. M., Kleinen, T., Yu, Z. C. and Kaplan, J. O.: Present state of global wetland extent and wetland methane modelling: conclusions from a model intercomparison project (WETCHIMP), *Biogeosciences*, 10(2), 753–788, doi:10.5194/bg-10-753-2013, 2013.

Membrive, O., Crevoisier, C., Sweeney, C., Danis, F., Hertzog, A., Engel, A., Bönisch, H. and Picon, L.: AirCore-HR: a high-resolution column sampling to enhance the vertical description of CH<sub>4</sub> and CO<sub>2</sub>, *Atmospheric Meas. Tech.*, 10(6), 2163–2181, doi:10.5194/amt-10-2163-2017, 2017.

Messenger, M. L., Lehner, B., Grill, G., Nedeva, I. and Schmitt, O.: Estimating the volume and age of water stored in global lakes using a geo-statistical approach, *Nat. Commun.*, 7(1), 1–11, doi:10.1038/ncomms13603, 2016.

Mijling, B., van der A, R. J. and Zhang, Q.: Regional nitrogen oxides emission trends in East Asia observed from space, *Atmospheric Chem. Phys.*, 13(23), 12003–12012, doi:10.5194/acp-13-12003-2013, 2013.

Milkov, A. V.: Molecular and stable isotope compositions of natural gas hydrates: A revised global dataset and basic interpretations in the context of geological settings, *Org. Geochem.*, 36(5), 681–702, 2005.

Minkinen, K. and Laine, J.: Vegetation heterogeneity and ditches create spatial variability in methane fluxes from peatlands drained for forestry, *Plant Soil*, 285(1), 289–304, doi:10.1007/s11104-006-9016-4, 2006.

Monforti Ferrario, Fabio; Crippa, Monica; Guizzardi, Diego; Muntean, Marilena; Schaaf, Edwin; Lo Vullo, Eleonora; Solazzo, Efsio; Olivier, Jos; Vignati, Elisabetta: EDGAR v6.0 Greenhouse Gas Emissions, European Commission, Joint Research Centre (JRC) [Dataset] PID: <http://data.europa.eu/89h/97a67d67-c62e-4826-b873-9d972c4f670b>, 2021

Montzka, S. A., Krol, M., Dlugokencky, E., Hall, B., Jockel, P. and Lelieveld, J.: Small Interannual Variability of Global Atmospheric Hydroxyl, *Science*, 331(6013), 67–69, 2011.

Moore, C. W., Zielinska, B., Pétron, G. and Jackson, R. B.: Air impacts of increased natural gas acquisition, processing, and use: a critical review, *Environ. Sci. Technol.*, 48, 8349–8359, doi:10.1021/es4053472, 2014.

Morgenstern, O., Hegglin, M. I., Rozanov, E., O'Connor, F. M., Abraham, N. L., Akiyoshi, H., Archibald, A. T., Bekki, S., Butchart, N., Chipperfield, M. P., Deushi, M., Dhomse, S. S., Garcia, R. R., Hardiman, S. C., Horowitz, L. W., Jöckel, P., Josse, B., Kinnison, D., Lin, M., Mancini, E., Manyin, M. E., Marchand, M., Marécal, V., Michou, M., Oman, L. D., Pitari, G., Plummer, D. A., Revell, L. E., Saint-Martin, D., Schofield, R., Stenke, A., Stone, K., Sudo, K., Tanaka, T. Y., Tilmes, S., Yamashita, Y., Yoshida, K., and Zeng, G.: Review of the global models used within phase 1 of the Chemistry–Climate Model Initiative (CCMI), *Geosci. Model Dev.*, 10, 639–671, <https://doi.org/10.5194/gmd-10-639-2017>, 2017.

Morino, I., Uchino, O., Inoue, M., Yoshida, Y., Yokota, T., Wennberg, P. O., Toon, G. C., Wunch, D., Roehl, C. M., Notholt, J., Warneke, T., Messerschmidt, J., Griffith, D. W. T., Deutscher, N. M., Sherlock, V., Connor, B., Robinson, J., Sussmann, R. and Rettinger, M.: Preliminary validation of column-averaged volume mixing ratios of carbon dioxide and methane retrieved from GOSAT short-wavelength infrared spectra, *Atmospheric Meas. Tech.*, 4(6), 1061–1076, 2011.

Murguía-Flores, F., Arndt, S., Ganesan, A. L., Murray-Tortarolo, G. and Hornibrook, E. R. C.: Soil Methanotrophy Model (MeMo v1.0): a process-based model to quantify global uptake of atmospheric methane by soil, *Geosci. Model Dev.*, 11(6), 2009–2032, doi:10.5194/gmd-11-2009-2018, 2018.

Myer, A., Myer, M.H., Trettin, C.C. and Forschler, B.T.: The fate of carbon utilized by the subterranean termite *Reticulitermes flavipes*. *Ecosphere* 12 (12):e03872,doi:10.1002/ecs2.3872, 2021

Myhre, G., Shindell, D., Bréon, F.-M., Collins, W., Fuglestedt, J., Huang, J., Koch, D., Lamarque, J.-F., Lee, D., Mendoza, B., Nakajima, T., Robock, A., Stephens, G., Takemura, T. and Zhang, H.: Anthropogenic and Natural Radiative Forcing., in *In Climate Change 2013: The Physical Science Basis. Contribution of Working Group I to the Fifth Assessment Report of the Intergovernmental Panel on Climate Change.*, edited by T. F. Stocker, D. D. Qin, G.-K. Plattner, M. Tignor, S. K. Allen, J. Boschung, A. Nauels, Y. Xia, V. Bex, and P. M. Midgley, Cambridge University Press, Cambridge, United Kingdom and New York, NY, USA., 2013.

Naik, V., Voulgarakis, A., Fiore, A. M., Horowitz, L. W., Lamarque, J. F., Lin, M., Prather, M. J., Young, P. J., Bergmann, D., Cameron-Smith, P. J., Cionni, I., Collins, W. J., Dalsoren, S. B., Doherty, R., Eyring, V., Faluvegi, G., Folberth, G. A., Josse, B., Lee, Y. H., MacKenzie, I. A., Nagashima, T., van Noije, T. P. C., Plummer, D. A., Righi, M., Rumbold, S. T., Skeie, R., Shindell, D. T., Stevenson, D. S., Strode, S., Sudo, K., Szopa, S. and Zeng, G.: Preindustrial to present day changes in tropospheric hydroxyl radical and methane lifetime from the Atmospheric Chemistry and Climate Model Intercomparison Project (ACCMIP). *Atmospheric Chem. Phys.*, 13(10), 5277–5298, doi:10.5194/acp-13-5277-2013, 2013.

Nakazawa, T., Machida, T., Tanaka, M., Fujii, Y., Aoki, S. and Watanabe, O.: Differences of the atmospheric CH<sub>4</sub> concentration between the Arctic and Antarctic regions in pre-industrial/pre-agricultural era, *Geophys. Res. Lett.*, 20(10), 943–946, doi:10.1029/93GL00776, 1993.

Natchimuthu, S., I. Sundgren, M. Gålfalk, L. Klemedtsson, P. Crill, Å. Danielsson, and D. Bastviken, Spatio-temporal variability of lake CH<sub>4</sub> fluxes and its influence on annual whole lake emission estimates. *Limnology and Oceanography*, 61(S1): p. S13-S26, 2016.

Nauer, P. A., Hutley, L. B., and Arndt, S. K.: Termite mounds mitigate half of termite methane emissions, *P. Natl. Acad. Sci. USA*, 115, 13306–13311, 2018.

Nicely, J. M., Salawitch, R. J., Canty, T., Anderson, D. C., Arnold, S. R., Chipperfield, M. P., Emmons, L. K., Flemming, J., Huijnen, V., Kinnison, D. E., Lamarque, J.-F., Mao, J., Monks, S. A., Steenrod, S. D., Tilmes, S. and Turquety, S.: Quantifying the causes of differences in tropospheric OH within global models, *J. Geophys. Res. Atmospheres*, 122(3), 1983–2007, doi:10.1002/2016JD026239, 2017.

Nirmal Rajkumar, A., J. Barnes, R. Ramesh, R. Purvaja, and R.C. Upstill-Goddard, Methane and nitrous oxide fluxes in the polluted Adyar River and estuary, SE India. *Marine Pollution Bulletin*, 56(12): p. 2043-2051, 2008

Nisbet, E. G., Manning, M. R., Dlugokencky, E. J., Fisher, R. E., Lowry, D., Michel, S. E., Myhre, C. L., Platt, S. M.,

Allen, G., Bousquet, P., Brownlow, R., Cain, M., France, J. L., Hermansen, O., Hossaini, R., Jones, A. E., Levin, I., Manning, A. C., Myhre, G., Pyle, J. A., Vaughn, B., Warwick, N. J. and White, J. W. C.: Very strong atmospheric methane growth in the four years 2014-2017: Implications for the Paris Agreement, *Glob. Biogeochem. Cycles*, 0(ja), doi:10.1029/2018GB006009, 2019.

Nisbet, E. G., Manning, M. R., Dlugokencky, E. J., Michel, S. E., Lan, X., Röckmann, T., van der Denier Gon, H. A., Schmitt, J., Palmer, P. I., Dyonisius, M. N., Oh, Y., Fisher, R. E., Lowry, D., France, J. L., White, J. W. C., Brailsford, G., and Bromley, T.: Atmospheric methane: Comparison between methane's record in 2006–2022 and during glacial terminations, *Global Biogeochem. Cy.*, 37, e2023GB007875, <https://doi.org/10.1029/2023GB007875>, 2023.

Nisbet, R. E. R., Fisher, R., Nimmo, R. H., Bendall, D. S., Crill, P. M., Gallego-Sala, A. V., Hornibrook, E. R. C., Lopez-Juez, E., Lowry, D., Nisbet, P. B. R., Shuckburgh, E. F., Sriskantharajah, S., Howe, C. J. and Nisbet, E. G.: Emission of methane from plants, *Proc. R. Soc. B-Biol. Sci.*, 276(1660), 1347–1354, 2009.

Niwa, Y., Fujii, Y., Sawa, Y., Iida, Y., Ito, A., Satoh, M., Imasu, R., Tsuboi, K., Matsueda, H. and Saigusa, N.: A 4D-Var inversion system based on the icosahedral grid model (NICAM-TM 4D-Var v1.0) – Part 2: Optimization scheme and identical twin experiment of atmospheric CO<sub>2</sub> inversion, *Geosci. Model Dev.*, 10(6), 2201–2219, doi:10.5194/gmd-10-2201-2017, 2017.

Niwa, Y., Ishijima, K., Ito, A. and Iida, Y.: Toward a long-term atmospheric CO<sub>2</sub> inversion for elucidating natural carbon fluxes: technical notes of NISMON-CO<sub>2</sub> v2021.1, *Prog. Earth Planet Sci.*, 9, 42, doi:10.1186/s40645-022-00502-6, 2022.

Noël, S., Reuter, M., Buchwitz, M., Borchardt, J., Hilker, M., Schneising, O., Bovensmann, H., Burrows, J. P., Di Noia, A., Parker, R. J., Suto, H., Yoshida, Y., Buschmann, M., Deutscher, N. M., Feist, D. G., Griffith, D. W. T., Hase, F., Kivi, R., Liu, C., Morino, I., Notholt, J., Oh, Y.-S., Ohyama, H., Petri, C., Pollard, D. F., Rettinger, M., Roehl, C., Rousogonous, C., Sha, M. K., Shiomi, K., Strong, K., Sussmann, R., Tê, Y., Velazco, V. A., Vrekoussis, M., and Warneke, T.: Retrieval of greenhouse gases from GOSAT and GOSAT-2 using the FOCAL algorithm, *Atmos. Meas. Tech.*, 15, 3401–3437, <https://doi.org/10.5194/amt-15-3401-2022>, 2022.

Nomura, S., Naja, M., Ahmed, M. K., Mukai, H., Terao, Y., Machida, T., Sasakawa, M., and Patra, P. K.: Measurement report: Regional characteristics of seasonal and long-term variations in greenhouse gases at Nainital, India, and Comilla, Bangladesh, *Atmos. Chem. Phys.*, 21, 16427–16452, <https://doi.org/10.5194/acp-21-16427-2021>, 2021.

Obu, J., Westermann, S., Bartsch, A., Berdnikov, N., Christiansen, H. H., Dashtseren, A., Delaloye, R., Elberling, B., Etzelmüller, B., Kholodov, A., Khomutov, A., Kääb, A., Leibman, M. O., Lewkowicz, A. G., Panda, S. K., Romanovsky, V., Way, R. G., Westergaard-Nielsen, A., Wu, T., Yamkhin, J. and Zou, D.: Northern Hemisphere permafrost map based on TTOP modelling for 2000–2016 at 1 km<sup>2</sup> scale, *Earth-Sci. Rev.*, 193, 299–316, doi:10.1016/j.earscirev.2019.04.023, 2019.

Ocko, I. B., Sun, T., Shindell, D., Oppenheimer, M., Hristov, A. N., Pacala, S. W., Mauzerall, D. L., Xu, Y. and Hamburg, S. P.: Acting rapidly to deploy readily available methane mitigation measures by sector can immediately slow global warming, *Environ. Res. Lett.*, 16, 054042, doi :10.1088/1748-9326/abf9c8, 2021

Odelson, D.A. and Breznak, J. A. Volatile fatty acid production by the hindgut microbiota of xilophagus termites. *Applied and Environmental Microbiology*, 45, 1602-1613, 1983. doi: 10.1128/aem.45.5.1602-1613.1983.

Olivier, J. G. J. and Janssens-Maenhout, G.: Part III: Total Greenhouse Gas Emissions, of CO<sub>2</sub> Emissions from Fuel Combustion (2014 ed.), International Energy Agency, Paris, ISBN-978-92-64-21709-6., 2014.

Ollivier, Q. R., Maher, D. T., Pitfield, C. and Macreadie, P. I.: Punching above their weight: Large release of greenhouse gases from small agricultural dams, *Glob. Change Biol.*, 25(2), 721–732, doi:10.1111/gcb.14477, 2019.

O'Neill, B. C., Tebaldi, C., Vuuren, D. P. van, Eyring, V., Friedlingstein, P., Hurtt, G., Knutti, R., Kriegler, E., Lamarque, J.-F., Lowe, J., Meehl, G. A., Moss, R., Riahi, K. and Sanderson, B. M.: The Scenario Model Intercomparison Project (ScenarioMIP) for CMIP6, *Geosci. Model Dev.*, 9(9), 3461–3482, doi:https://doi.org/10.5194/gmd-9-3461-2016, 2016.

Oreggioni, G. D., F. Monforti Ferrario, M. Crippa, M. Muntean, E. Schaaf, D. Guizzardi, E. Solazzo, M. Duerr, M. Perry and E. Vignati: Climate change in a changing world: Socio-economic and technological transitions, regulatory frameworks and trends on global greenhouse gas emissions from EDGAR v.5.0, *Global Environmental Change*, doi:10.1016/j.gloenvcha.2021.10235, 2021

Oremland, R. S. Methanogenic activity in plankton samples and fish intestines: a mechanism for *in situ* methanogenesis in oceanic surface waters. *Limnol. Oceanogr.* 24, 1136–1141, 1979.

O'Rourke, P. R., Smith, S. J., Mott, A., Ahsan, H., McDuffie, E. E., Crippa, M., Klimont, S., McDonald, B., Z., Wang, Nicholson, M. B., Feng, L., and Hoesly, R. M., CEDS v-2021-02-05 Emission Data 1975-2019 (Version Feb-05-2021), Zenodo. <http://doi.org/10.5281/zenodo.4509372>, 2021

Ovalle, A. R. C., C. E. Rezende, L. D. Lacerda, and C. A. R. Silva: Factors affecting the hydrochemistry of a mangrove tidal creek, Sepetiba Bay, Brazil. *Estuar. Coast. Shelf Sci.* 31: 639–650. doi:10.1016/0272-7714(90)90017-L, 1990

Pacala, S. W.: Verifying greenhouse gas emissions: Methods to support international climate agreements, National Academies Press., 2010

Pandey, S., Gautam, R., Houweling, S., Gon, H. D. van der, Sadavarte, P., Borsdorff, T., Hasekamp, O., Landgraf, J., Tol, P., Kempen, T. van, Hoogeveen, R., Hees, R. van, Hamburg, S. P., Maasakkers, J. D. and Aben, I.: Satellite observations reveal extreme methane leakage from a natural gas well blowout, *Proc. Natl. Acad. Sci.*, 116(52), 26376–26381, doi:10.1073/pnas.1908712116, 2019.

Pangala, S. R., Moore, S., Hornibrook, E. R. C. and Gauci, V.: Trees are major conduits for methane egress from tropical forested wetlands, *New Phytol.*, 197(2), 524–531, doi:10.1111/nph.12031, 2013.

Pangala, S. R., Hornibrook, E. R. C., Gowing, D. J. and Gauci, V.: The contribution of trees to ecosystem methane



emissions in a temperate forested wetland, *Glob. Change Biol.*, 21(7), 2642–2654, doi:10.1111/gcb.12891, 2015.

Pangala, S. R., Enrich-Prast, A., Basso, L. S., Peixoto, R. B., Bastviken, D., Hornibrook, E. R. C., Gatti, L. V., Marotta, H., Calazans, L. S. B., Sakuragai, C. M., Bastos, W. R., Malm, O., Gloor, E., Miller, J. B. and Gauci, V.: Large emissions from floodplain trees close the Amazon methane budget, *Nature*, 552(7684), 230–234, doi:10.1038/nature24639, 2017.

Paris, J.-D., Ciais, P., Nédélec, P., Stohl, A., Belan, B. D., Arshinov, M. Y., Carouge, C., Golitsyn, G. S. and Granberg, I. G.: New insights on the chemical composition of the Siberian air shed from the YAK AEROSIB aircraft campaigns, *Bull. Am. Meteorol. Soc.*, 91(5), 625–641, doi:10.1175/2009BAMS2663.1., 2010.

Parker, R. J., Webb, A., Boesch, H., Somkuti, P., Barrio Guillo, R., Di Noia, A., Kalaitzi, N., Anand, J. S., Bergamaschi, P., Chevallier, F., Palmer, P. I., Feng, L., Deutscher, N. M., Feist, D. G., Griffith, D. W. T., Hase, F., Kivi, R., Morino, I., Notholt, J., Oh, Y.-S., Ohyama, H., Petri, C., Pollard, D. F., Roehl, C., Sha, M. K., Shiomi, K., Strong, K., Sussmann, R., Té, Y., Velasco, V. A., Warneke, T., Wennberg, P. O., and Wunch, D.: A decade of GOSAT Proxy satellite CH<sub>4</sub> observations, *Earth Syst. Sci. Data*, 12, 3383–3412, <https://doi.org/10.5194/essd-12-3383-2020>, 2020.

Parker, R. and Boesch, H. (2020): University of Leicester GOSAT Proxy XCH<sub>4</sub> v9.0. Centre for Environmental Data Analysis, 07 May 2020. <https://dx.doi.org/10.5285/18ef8247f52a4cb6a14013f8235cc1eb>, 2020.

Parker, R. J., Wilson, C., Comyn-Platt, E., Hayman, G., Marthews, T. R., Bloom, A. A., Lunt, M. F., Gedney, N., Dadson, S. J., McNorton, J., Humpage, N., Boesch, H., Chipperfield, M. P., Palmer, P. I., and Yamazaki, D.: Evaluation of wetland CH<sub>4</sub> in the Joint UK Land Environment Simulator (JULES) land surface model using satellite observations, *Biogeosciences*, 19, 5779–5805, <https://doi.org/10.5194/bg-19-5779-2022>, 2022.

Pathak, H., Li, C. and Wassmann, R.: Greenhouse gas emissions from Indian rice fields: calibration and upscaling using the DNDC model, *Biogeosciences*, 1(1), 1–11, 2005.

Patra, P. K., Houweling, S., Krol, M., Bousquet, P., Belikov, D., Bergmann, D., Bian, H., Cameron-Smith, P., Chipperfield, M. P., Corbin, K., Fortems-Cheiney, A., Fraser, A., Gloor, E., Hess, P., Ito, A., Kawa, S. R., Law, R. M., Loh, Z., Maksyutov, S., Meng, L., Palmer, P. I., Prinn, R. G., Rigby, M., Saito, R. and Wilson, C.: TransCom model simulations of CH<sub>4</sub> and related species: linking transport, surface flux and chemical loss with CH<sub>4</sub> variability in the troposphere and lower stratosphere, *Atmospheric Chem. Phys.*, 11(24), 12,813–12,837, doi:10.5194/acp-11-12813-2011, 2011.

Patra, P. K., Krol, M. C., Montzka, S. A., Arnold, T., Atlas, E. L., Lintner, B. R., Stephens, B. B., Xiang, B., Elkins, J. W., Fraser, P. J., Ghosh, A., Hintsa, E. J., Hurst, D. F., Ishijima, K., Krummel, P. B., Miller, B. R., Miyazaki, K., Moore, F. L., Mühle, J., O'Doherty, S., Prinn, R. G., Steele, L. P., Takigawa, M., Wang, H. J., Weiss, R. F., Wofsy, S. C. and Young, D.: Observational evidence for interhemispheric hydroxyl-radical parity, *Nature*, 513(7517), 219–223, doi:10.1038/nature13721, 2014.

Patra, P. K., Takigawa, M., Watanabe, S., Chandra, N., Ishijima, K. and Yamashita, Y.: Improved Chemical Tracer Simulation by MIROC4.0-based Atmospheric Chemistry-Transport Model (MIROC4-ACTM), *SOLA*, 14(0), 91–96,

doi:10.2151/sola.2018-016, 2018.

Patra, P. K., Krol, M. C., Prinn, R. G., Takigawa, M., Mühle, J., Montzka, S. A., Lal, S., Yamashita, Y., Naus, S., Chandra, N., Weiss, R. F., Krummel, P. B., Fraser, P. J., O'Doherty, S., and Elkins, J. W.: Methyl Chloroform Continues to Constrain the Hydroxyl (OH) Variability in the Troposphere, *J. Geophys. Res.-Atmos.*, 126, e2020JD033862, <https://doi.org/10.1029/2020JD033862>, 2021.

Paull, C. K., Brewer, P. G., Ussler, W., Peltzer, E. T., Rehder, G. and Clague, D.: An experiment demonstrating that marine slumping is a mechanism to transfer methane from seafloor gas-hydrate deposits into the upper ocean and atmosphere, *Geo-Mar. Lett.*, 22(4), 198–203, doi:10.1007/s00367-002-0113-y, 2002.

Peacock, M., J. Audet, D. Bastviken, M.N. Futter, V. Gauci, A. Grinham, J.A. Harrison, M.S. Kent, S. Kosten, C.E. Lovelock, A.J. Veraart, and C.D. Evans, Global importance of methane emissions from drainage ditches and canals, *Environmental Research Letters*, 16(4): p. 044010., 2021

Peischl, J., Ryerson, T. B., Aikin, K. C., de Gouw, J. A., Gilman, J. B., Holloway, J. S., Lerner, B. M., Nadkarni, R., Neuman, J. A., Nowak, J. B., Trainer, M., Warneke, C. and Parrish, D. D.: Quantifying atmospheric methane emissions from the Haynesville, Fayetteville, and northeastern Marcellus shale gas production regions, *J. Geophys. Res. Atmospheres*, 120(5), 2119–2139, doi:10.1002/2014jd022697, 2015.

Pekel, J.-F., Cottam, A., Gorelick, N. and Belward, A. S.: High-resolution mapping of global surface water and its long-term changes, *Nature*, 540(7633), 418–422, doi:10.1038/nature20584, 2016.

Peltola, O., Vesala, T., Gao, Y., Rätty, O., Alekseychik, P., Aurela, M., Chojnicki, B., Desai, A. R., Dolman, A. J., Euskirchen, E. S., Friborg, T., Göckede, M., Helbig, M., Humphreys, E., Jackson, R. B., Jocher, G., Joos, F., Klatt, J., Knox, S. H., Kowalska, N., Kutzbach, L., Lienert, S., Lohila, A., Mammarella, I., Nadeau, D. F., Nilsson, M. B., Oechel, W. C., Peichl, M., Pypker, T., Quinton, W., Rinne, J., Sachs, T., Samson, M., Schmid, H. P., Sonnentag, O., Wille, C., Zona, D. and Aalto, T.: Monthly gridded data product of northern wetland methane emissions based on upscaling eddy covariance observations, *Earth Syst. Sci. Data*, 11(3), 1263–1289, doi:10.5194/essd-11-1263-2019, 2019.

Peng, S. S., Piao, S. L., Bousquet, P., Ciais, P., Li, B. G., Lin, X., Tao, S., Wang, Z. P., Zhang, Y. and Zhou, F.: Inventory of anthropogenic methane emissions in Mainland China from 1980 to 2010, *Atmospheric Chem. Phys. Discuss.*, 2016, 1–29, doi:10.5194/acp-2016-139, 2016.

Peng, S., Lin, X., Thompson, R. L., Xi, Y., Liu, G., Hauglustaine, D., Lan, X., Poulter, B., Ramonet, M., Saunio, M., Yin, Y., Zhang, Z., Zheng, B., and Ciais, P.: Wetland emission and atmospheric sink changes explain methane growth in 2020, *Nature*, 612, 477–482, <https://doi.org/10.1038/s41586-022-05447-w>, 2022.

Pérez-Barbería, F. J.: Scaling methane emissions in ruminants and global estimates in wild populations, *Sci. Total Environ.*, 579, 1572–1580, doi:10.1016/j.scitotenv.2016.11.175, 2017.

Petersen, H. and Luxton, M. A comparative analysis of soil fauna populations and their role in decomposition processes.

Oikos 39: 287–388, doi.org/10.2307/3544689, 1982

Petrenko, V. V., Smith, A. M., Schaefer, H., Riedel, K., Brook, E., Baggenstos, D., Harth, C., Hua, Q., Buizert, C., Schilt, A., Fain, X., Mitchell, L., Bauska, T., Orsi, A., Weiss, R. F. and Severinghaus, J. P.: Minimal geological methane emissions during the Younger Dryas–Preboreal abrupt warming event, *Nature*, 548, 443, doi:10.1038/nature23316 <https://www.nature.com/articles/nature23316#supplementary-information>, 2017.

Petrescu, A. M. R., Qiu, C., Ciais, P., Thompson, R. L., Peylin, P., McGrath, M. M., Solazzo, E., Janssens-Maenhout, G., Tubiello, F. N., Bergamaschi, P., Brunner, D., Peters, G. P., Höglund-Isaksson, L., Regnier, P., Lauerwald, R., Bastviken, D., Tsuruta, A., Winiwarter, W., Patra, P. P., Kuhnert, M., Oreggioni, G. D., Crippa, M., Saunio, M., Perugini, L., Markkanen, T., Aalto, T., Groot Zwaaftink, C. C., Yao, Y., Wilson, C. C., Conchedda, G., Günther, D., Leip, A., Smith, P., Haussaire, J. M., Leppänen, A., Manning, A. J., McNorton, J., Brockmann, P., & Dolman, A. J. H. A. The consolidated European synthesis of CH<sub>4</sub> and N<sub>2</sub>O emissions for the European Union and United Kingdom: 1990–2017. *Earth System Science Data*, 13(5), 2307–2362, doi:10.5194/essd-13-2307-2021, 2021.

Petrescu, A. M. R., Qiu, C., McGrath, M. J., Peylin, P., Peters, G. P., Ciais, P., Thompson, R. L., Tsuruta, A., Brunner, D., Kuhnert, M., Matthews, B., Palmer, P. I., Tarasova, O., Regnier, P., Lauerwald, R., Bastviken, D., Höglund-Isaksson, L., Winiwarter, W., Etiope, G., Aalto, T., Balsamo, G., Bastrikov, V., Berchet, A., Brockmann, P., Ciotoli, G., Conchedda, G., Crippa, M., Dentener, F., Groot Zwaaftink, C. D., Guizzardi, D., Günther, D., Haussaire, J.-M., Houweling, S., Janssens-Maenhout, G., Kouyate, M., Leip, A., Leppänen, A., Lugato, E., Maisonnier, M., Manning, A. J., Markkanen, T., McNorton, J., Muntean, M., Oreggioni, G. D., Patra, P. K., Perugini, L., Pison, I., Raivonen, M. T., Saunio, M., Segers, A. J., Smith, P., Solazzo, E., Tian, H., Tubiello, F. N., Vesala, T., van der Werf, G. R., Wilson, C., and Zaehle, S.: The consolidated European synthesis of CH<sub>4</sub> and N<sub>2</sub>O emissions for the European Union and United Kingdom: 1990–2019, *Earth Syst. Sci. Data*, 15, 1197–1268, <https://doi.org/10.5194/essd-15-1197-2023>, 2023.

Pétron, G., Karion, A., Sweeney, C., Miller, B. R., Montzka, S. A., Frost, G. J., Trainer, M., Tans, P., Andrews, A., Kofler, J., Helmig, D., Guenther, D., Dlugokencky, E., Lang, P., Newberger, T., Wolter, S., Hall, B., Novelli, P., Brewer, A., Conley, S., Hardesty, M., Banta, R., White, A., Noone, D., Wolfe, D. and Schnell, R.: A new look at methane and nonmethane hydrocarbon emissions from oil and natural gas operations in the Colorado Denver-Julesburg Basin, *J. Geophys. Res. Atmospheres*, 119(11), 6836–6852, doi:10.1002/2013jd021272, 2014.

Phillips, N. G., Ackley, R., Crosson, E. R., Down, A., Hutyrá, L. R., Brondfield, M., Karr, J. D., Zhao, K. and Jackson, R. B.: Mapping urban pipeline leaks: Methane leaks across Boston, *Environ. Pollut.*, 173, 1–4, doi:10.1016/j.envpol.2012.11.003, 2013.

Pison, I., Ringeval, B., Bousquet, P., Prigent, C. and Papa, F.: Stable atmospheric methane in the 2000s: key-role of emissions from natural wetlands, *Atmospheric Chem. Phys. Discuss.*, 13(4), 9017–9049, doi:10.5194/acpd-13-9017-2013, 2013.

Pitz, S. and Megonigal, J. P.: Temperate forest methane sink diminished by tree emissions, *New Phytol.*, 214(4), 1432–

1439, doi:10.1111/nph.14559, 2017.

Platt, U., Allan, W. and Lowe, D.: Hemispheric average Cl atom concentration from  $^{13}\text{C}/^{12}\text{C}$  ratios in atmospheric methane, *Atmos Chem Phys*, 4, 2393–2399, 2004.

Plummer, D., Nagashima, T., Tilmes, S., Archibald, A., Chiodo, G., Fadnavis, S., Garny, H., Josse, B., Kim, J., Lamarque, J.-F., Morgenstern, O., Murray, L., Orbe, C., Tai, A., Chipperfield, M., Funke, B., Juckes, M., Kinnison, D., Kunze, M., Luo, B., Matthes, K., Newman, P. A., Pascoe, C. and Peter, T.: CCMI- 2022: a new set of Chemistry–Climate Model Initiative (CCMI) community simulations to update the assessment of models and support upcoming ozone assessment activities. *SPARC Newsletter* 57, 22–30, 2021.

Pollard, D. F., Sherlock, V., Robinson, J., Deutscher, N. M., Connor, B. and Shiona, H.: The Total Carbon Column Observing Network site description for Lauder, New Zealand, *Earth Syst. Sci. Data*, 9(2), 977–992, doi:10.5194/essd-9-977-2017, 2017.

Portmann, F. T., Siebert, S. & Döll, P. : MIRCA2000 – Global monthly irrigated and rainfed crop areas around the year 2000: A new high-resolution data set for agricultural and hydrological modeling, *Global Biogeochemical Cycles*, 24, GB 1011, doi:10.1029/2008GB003435, 2010

Portmann, R. W., Daniel, J. S. and Ravishankara, A. R.: Stratospheric ozone depletion due to nitrous oxide: influences of other gases, *Philos. Trans. R. Soc. Lond. B Biol. Sci.*, 367(1593), 1256–1264, doi:10.1098/rstb.2011.0377, 2012.

Poulter, B., Bousquet, P., Canadell, J. G., Ciais, P., Peregon, A., Saunio, M., Arora, V. K., Beerling, D. J., Brovkin, V., Jones, C. D., Joos, F., Gedney, N., Ito, A., Kleinen, T., Koven, C. D., McDonald, K., Melton, J. R., Peng, C. H., Peng, S. S., Prigent, C., Schroeder, R., Riley, W. J., Saito, M., Spahni, R., Tian, H. Q., Taylor, L., Viovy, N., Wilton, D., Wiltshire, A., Xu, X. Y., Zhang, B. W., Zhang, Z. and Zhu, Q. A.: Global wetland contribution to 2000–2012 atmospheric methane growth rate dynamics, *Environ. Res. Lett.*, 12(9), doi:10.1088/1748-9326/aa8391, 2017.

Prairie, Y. T., J. Alm, J. Beaulieu, N. Barros, T. Battin, J. Cole, P. del Giorgio, T. DelSontro, F. Guérin, A. Harby, J. Harrison, S. Mercier-Blais, D. Serça, S. Sobek, and D. Vachon, *Greenhouse Gas Emissions from Freshwater Reservoirs: What Does the Atmosphere See? Ecosystems*, 21(5): p. 1058–1071, 2018

Prather, M. J., Holmes, C. D. and Hsu, J.: Reactive greenhouse gas scenarios: Systematic exploration of uncertainties and the role of atmospheric chemistry, *Geophys. Res. Lett.*, 39(9), L09803, doi:10.1029/2012gl051440, 2012.

Prinn, R. G., Weiss, R. F., Arduini, J., Arnold, T., DeWitt, H. L., Fraser, P. J., Ganesan, A. L., Gasore, J., Harth, C. M., Hermansen, O., Kim, J., Krummel, P. B., Li, S., Loh, Z. M., Lunder, C. R., Maione, M., Manning, A. J., Miller, B. R., Mitrevski, B., Mühle, J., O'Doherty, S., Park, S., Reimann, S., Rigby, M., Saito, T., Salameh, P. K., Schmidt, R., Simmonds, P. G., Steele, L. P., Vollmer, M. K., Wang, R. H., Yao, B., Yokouchi, Y., Young, D., and Zhou, L.: History of chemically and radiatively important atmospheric gases from the Advanced Global Atmospheric Gases Experiment (AGAGE), *Earth Syst. Sci. Data*, 10, 985–1018, <https://doi.org/10.5194/essd-10-985-2018>, 2018.

Prosperi, P., Bloise, M., Tubiello, F.N. *et al.* New estimates of greenhouse gas emissions from biomass burning and peat

fires using MODIS Collection 6 burned areas. *Climatic Change* **161**, 415–432, <https://doi.org/10.1007/s10584-020-02654-0>, 2020

Purvaja, R., Ramesh, R., & Frenzel, P.: Plant-mediated methane emission from an Indian mangrove, *Global Change Biology*, **10**, 1825–1834, 2004

Qin, B., Zhou, J., Elser, J.J., Gardner, W.S., Deng, J., and J.D. Brookes: Water depth underpins the relative roles and fates of nitrogen and phosphorus in lakes, *Environmental Science & Technology* **2020**, *54* (6), 3191-3198, DOI: [10.1021/acs.est.9b05858](https://doi.org/10.1021/acs.est.9b05858), 2020.

Qu, Z., Jacob, D. J., Shen, L., Lu, X., Zhang, Y., Scarpelli, T. R., Nesser, H., Sulprizio, M. P., Maasakkers, J. D., Bloom, A. A., Worden, J. R., Parker, R. J., and Delgado, A. L.: Global distribution of methane emissions: a comparative inverse analysis of observations from the TROPOMI and GOSAT satellite instruments, *Atmos. Chem. Phys.*, **21**, 14159–14175, <https://doi.org/10.5194/acp-21-14159-2021>, 2021.

Qu, Z., Jacob, D. J., Zhang, Y., Shen, L., Varon, D. J., Lu, X., Scarpelli, T., Bloom, A., Worden, J., and Parker, R. J.: Attribution of the 2020 surge in atmospheric methane by inverse analysis of GOSAT observations, *Environ. Res. Lett.*, **17**, 094003, <https://doi.org/10.1088/1748-9326/ac8754>, 2022.

Randerson, J. T., Chen, Y., van der Werf, G. R., Rogers, B. M. and Morton, D. C.: Global burned area and biomass burning emissions from small fires, *J. Geophys. Res. Biogeosciences*, **117**, G4, doi:10.1029/2012jg002128, 2012.

Ramage, J.L., Kuhn, M., Virkkala, A.M., Voigt, C., Marushchak, M.E., Bastos, A., Biasi, C., Canadell, J.G., Ciais, P., López-Blanco, E., Natali, S.M., et al.: The net GHG balance and budget of the permafrost region (2000-2020) from ecosystem flux upscaling. Preprint in ESS Open Archive. September 11, 2023. DOI: [10.22541/essoar.169447408.86275712/v1](https://doi.org/10.22541/essoar.169447408.86275712/v1), 2023

Ramsden, A. E., Ganesan, A. L., Western, L. M., Rigby, M., Manning, A. J., Foulds, A., France, J. L., Barker, P., Levy, P., Say, D., Wisher, A., Arnold, T., Rennick, C., Stanley, K. M., Young, D., and O'Doherty, S.: Quantifying fossil fuel methane emissions using observations of atmospheric ethane and an uncertain emission ratio, *Atmos. Chem. Phys.*, **22**, 3911–3929, <https://doi.org/10.5194/acp-22-3911-2022>, 2022.

Ray, N.E., Holgerson, M.A., Andersen, M.R., Bikše, J., Bortolotti, L.E., Futter, M., Kokorite, I., Law, A., McDonald, C., Mesman, J.P., Peacock, M., Richardson, D.C., Arsenaault, J., Bansal, S., Cawley, K., Kuhn, M., Shahabinia, A.R. and Smufer, F.: Spatial and temporal variability in summertime dissolved carbon dioxide and methane in temperate ponds and shallow lakes. *Limnol Oceanogr.*, **68**: 1530-1545. <https://doi.org/10.1002/lno.12362>, 2023

Regnier P., Arndt, S., Dale, A.W., LaRowe, D.E., Mogollon, J. and Van Cappellen, P. Advances in the biogeochemical modeling of anaerobic oxidation of methane (AOM). *Earth Science Reviews*. **106**, 105-130, 2011;

Ren, W. E. I., Tian, H., Xu, X., Liu, M., Lu, C., Chen, G., Melillo, J., Reilly, J. and Liu, J.: Spatial and temporal patterns of CO<sub>2</sub> and CH<sub>4</sub> fluxes in China's croplands in response to multifactor environmental changes, *Tellus B*, **63**(2), 222–240, doi:10.1111/j.1600-0889.2010.00522.x, 2011.

Repeta, D. J., Ferrón, S., Sosa, O. A., Johnson, C. G., Repeta, L. D., Acker, M., DeLong, E. F. and Karl, D. M.: Marine methane paradox explained by bacterial degradation of dissolved organic matter, *Nat. Geosci.*, 9(12), 884–887, doi:10.1038/ngeo2837, 2016.

Riahi, K., van Vuuren, D. P., Kriegler, E., Edmonds, J., O'Neill, B. C., Fujimori, S., Bauer, N., Calvin, K., Dellink, R., Fricko, O., Lutz, W., Popp, A., Cuaresma, J. C., Kc, S., Leimbach, M., Jiang, L., Kram, T., Rao, S., Emmerling, J., Ebi, K., Hasegawa, T., Havlik, P., Humpenöder, F., Da Silva, L. A., Smith, S., Stehfest, E., Bosetti, V., Eom, J., Gernaat, D., Masui, T., Rogelj, J., Strefler, J., Drouet, L., Krey, V., Luderer, G., Harmsen, M., Takahashi, K., Baumstark, L., Doelman, J. C., Kainuma, M., Klimont, Z., Marangoni, G., Lotze-Campen, H., Obersteiner, M., Tabeau, A. and Tavoni, M.: The Shared Socioeconomic Pathways and their energy, land use, and greenhouse gas emissions implications: An overview, *Glob. Environ. Change*, 42, 153–168, doi:10.1016/j.gloenvcha.2016.05.009, 2017.

Rice, A. L., Butenhoff, C. L., Shearer, M. J., Teama, D., Rosenstiel, T. N. and Khalil, M. A. K.: Emissions of anaerobically produced methane by trees, *Geophys. Res. Lett.*, 37, L03807, doi:10.1029/2009GL041565, 2010.

Ridgwell, A. J., Marshall, S. J. and Gregson, K.: Consumption of atmospheric methane by soils: A process-based model, *Glob. Biogeochem. Cycles*, 13(1), 59–70, doi:10.1029/1998gb900004, 1999.

Riedel, T. P., Wolfe, G. M., Danas, K. T., Gilman, J. B., Kuster, W. C., Bon, D. M., Vlasenko, A., Li, S. M., Williams, E. J., Lerner, B. M., Veres, P. R., Roberts, J. M., Holloway, J. S., Lefer, B., Brown, S. S. and Thornton, J. A.: An MCM modeling study of nitryl chloride (ClNO<sub>2</sub>) impacts on oxidation, ozone production and nitrogen oxide partitioning in polluted continental outflow, *Atmospheric Chem. Phys.*, 14(8), 3789–3800, doi:10.5194/acp-14-3789-2014, 2014.

Rigby, M., Montzka, S. A., Prinn, R. G., White, J. W. C., Young, D., O'Doherty, S., Lunt, M. F., Ganesan, A. L., Manning, A. J., Simmonds, P. G., Salameh, P. K., Harth, C. M., Mühle, J., Weiss, R. F., Fraser, P. J., Steele, L. P., Krummel, P. B., McCulloch, A. and Park, S.: Role of atmospheric oxidation in recent methane growth, *Proc. Natl. Acad. Sci.*, 114(21), 5373, 2017.

Riley, W. J., Subin, Z. M., Lawrence, D. M., Swenson, S. C., Tom, M. S., Meng, L., Mahowald, N. M. and Hess, P.: Barriers to predicting changes in global terrestrial methane fluxes: analyses using CLM4Me, a methane biogeochemistry model integrated in CESM, *Biogeosciences*, 8(7), 1925–1953, doi:10.5194/bg-8-1925-2011, 2011.

Ringeval, B., Friedlingstein, P., Koven, C., Ciais, P., de Noblet-Ducoudre, N., Decharme, B. and Cadule, P.: Climate-CH<sub>4</sub> feedback from wetlands and its interaction with the climate-CO<sub>2</sub> feedback, *Biogeosciences*, 8(8), 2137–2157, doi:10.5194/bg-8-2137-2011, 2011.

Robison, A.L., W.M. Wollheim, B. Turek, C. Bova, C. Snay, and R.K. Varner, Spatial and temporal heterogeneity of methane ebullition in lowland headwater streams and the impact on sampling design, *Limnology and Oceanography*, 66(12): p. 4063-4076, 2021

Rocher-Ros, G., Stanley, E.H., Loken, L.C., Casson, N.J., Raymond, P.A., Liu, S., Amatulli, G. and Sponseller, R.A.: Global methane emissions from rivers and streams. *Nature*, pp.1-6, 621, 530–535, https://doi.org/10.1038/s41586-023-

06344-6, 2023

- Rosentreter, J. A., Maher, D. T., Erler, D. V., Murray, R. H. and Eyre, B. D.: Methane emissions partially offset “blue carbon” burial in mangroves, *Sci. Adv.*, 4(6), eaao4985, doi:10.1126/sciadv.aao4985, 2018.
- Rosentreter, J. A., A. V Borges, B. R. Deemer, and others : Half of global methane emissions come from highly variable aquatic ecosystem sources. *Nat. Geosci.* **14**: 225–230. doi:10.1038/s41561-021-00715-2, 2021
- Rosentreter, J.A., Laruelle, G.G., Bange, H.W., Bianchi, T.S., Busecke, J.J.M., Cai, W-J, Eyre, B.D., Forbrich, I., Kwon, E.Y., Mavara, T., Moosdorf, N., Van Dam, B. and Regnier, P. Coastal vegetation and estuaries are collectively a greenhouse gas sink. *Nature Climate Change*, 13, 579–587, doi: 10.1038/s41558-023-01682-9, 2023.
- Rosentreter, J.A., Alcott, L., Maavara, T., Sun, X., Zhou, Y., Planavsky, N., & Raymond, P. Revisiting the Global Methane Cycle Through Expert Opinion (submitted to *Earth Future*).
- Ruppel, C. D., and J. D. Kessler (2017), The interaction of climate change and methane hydrates, *Rev. Geophys.*, **55**, 126-168, doi:10.1002/2016RG000534, 2017
- Saad, K. M., Wunch, D., Toon, G. C., Bernath, P., Boone, C., Connor, B., Deuscher, N. M., Griffith, D. W. T., Kivi, R., Notholt, J., Roehl, C., Schneider, M., Sherlock, V. and Wennberg, P. O.: Derivation of tropospheric methane from TCCON CH<sub>4</sub> and HF total column observations, *Atmospheric Meas. Technol.*, 7(9), 2907–2918, doi:10.5194/amt-7-2907-2014, 2014.
- Sanderson, M. G.: Biomass of termites and their emissions of methane and carbon dioxide: A global database, *Glob. Biogeochem. Cycles*, 10(4), 543–557, doi:10.1029/96gb01893, 1996.
- Sasakawa, M., Shimoyama, K., Machida, T., Tsuda, N., Suto, H., Arshinov, M., Davydov, D., Fofonov, A., Krasnov, O., Saeki, T., Koyama, Y. and Maksyutov, S.: Continuous measurements of methane from a tower network over Siberia, *Tellus B*, 62(5), 403–416, doi:10.1111/j.1600-0889.2010.00494.x, 2010.
- Sasakawa, M., Machida, T., Ishijima, K., Arshinov, M., Patra, P. K., Ito, A., Aoki, S., and Petrov, V.: Temporal characteristics of CH<sub>4</sub> vertical profiles observed in the West Siberian Lowland over Surgut from 1993 to 2015 and Novosibirsk from 1997 to 2015. *Journal of Geophysical Research: Atmospheres*, 122, 11,261– 11,273. <https://doi.org/10.1002/2017JD026836>, 2017.
- Saunio, M., Bousquet, P., Poulter, B., Peregon, A., Ciais, P., Canadell, J. G., Dlugokencky, E. J., Etiope, G., Bastviken, D., Houweling, S., Janssens-Maenhout, G., Tubiello, F. N., Castaldi, S., Jackson, R. B., Alexe, M., Arora, V. K., Beerling, D. J., Bergamaschi, P., Blake, D. R., Brailsford, G., Brovkin, V., Bruhwiler, L., Crevoisier, C., Crill, P., Covey, K., Curry, C., Frankenberg, C., Gedney, N., Höglund-Isaksson, L., Ishizawa, M., Ito, A., Joos, F., Kim, H. S., Kleinen, T., Krummel, P., Lamarque, J. F., Langenfelds, R., Locatelli, R., Machida, T., Maksyutov, S., McDonald, K. C., Marshall, J., Melton, J. R., Morino, I., Naik, V., O’Doherty, S., Parmentier, F. J. W., Patra, P. K., Peng, C., Peng, S., Peters, G. P., Pison, I., Prigent, C., Prinn, R., Ramonet, M., Riley, W. J., Saito, M., Santini, M., Schroeder, R., Simpson, I. J., Spahni, R., Steele, P., Takizawa, A., Thornton, B. F., Tian, H., Tohjima, Y., Viovy, N., Voulgarakis,



A., van Weele, M., van der Werf, G. R., Weiss, R., Wiedinmyer, C., Wilton, D. J., Wiltshire, A., Worthy, D., Wunch, D., Xu, X., Yoshida, Y., Zhang, B., Zhang, Z. and Zhu, Q.: The global methane budget 2000–2012, *Earth Syst Sci Data*, 8(2), 697–751, doi:10.5194/essd-8-697-2016, 2016.

Saunio, M., Bousquet, P., Poulter, B., Peregon, A., Ciais, P., Canadell, J. G., Dlugokencky, E. J., Etiope, G., Bastviken, D., Houweling, S., Janssens-Maenhout, G., Tubiello, F. N., Castaldi, S., Jackson, R. B., Alexe, M., Arora, V. K., Beerling, D. J., Bergamaschi, P., Blake, D. R., Brailsford, G., Bruhwiler, L., Crevoisier, C., Crill, P., Covey, K., Frankenberg, C., Gedney, N., Höglund-Isaksson, L., Ishizawa, M., Ito, A., Joos, F., Kim, H. S., Kleinen, T., Krummel, P., Lamarque, J. F., Langenfelds, R., Locatelli, R., Machida, T., Maksyutov, S., Melton, J. R., Morino, I., Naik, V., O'Doherty, S., Parmentier, F. J. W., Patra, P. K., Peng, C., Peng, S., Peters, G. P., Pison, I., Prinn, R., Ramonet, M., Riley, W. J., Saito, M., Santini, M., Schroeder, R., Simpson, I. J., Spahni, R., Takizawa, A., Thornton, B. F., Tian, H., Tohjima, Y., Viovy, N., Voulgarakis, A., Weiss, R., Wilton, D. J., Wiltshire, A., Worthy, D., Wunch, D., Xu, X., Yoshida, Y., Zhang, B., Zhang, Z. and Zhu, Q.: Variability and quasi-decadal changes in the methane budget over the period 2000–2012, *Atmospheric Chem. Phys.*, 17(18), 11135–11161, doi:10.5194/acp-17-11135-2017, 2017.

Saunio, M., Stavert, A. R., Poulter, B., Bousquet, P., Canadell, J. G., Jackson, R. B., Raymond, P. A., Dlugokencky, E. J., Houweling, S., Patra, P. K., Ciais, P., Arora, V. K., Bastviken, D., Bergamaschi, P., Blake, D. R., Brailsford, G., Bruhwiler, L., Carlson, K. M., Carrol, M., Castaldi, S., Chandra, N., Crevoisier, C., Crill, P. M., Covey, K., Curry, C. L., Etiope, G., Frankenberg, C., Gedney, N., Hegglin, M. I., Höglund-Isaksson, L., Hugelius, G., Ishizawa, M., Ito, A., Janssens-Maenhout, G., Jensen, K. M., Joos, F., Kleinen, T., Krummel, P. B., Langenfelds, R. L., Laruelle, G. G., Liu, L., Machida, T., Maksyutov, S., McDonald, K. C., McNorton, J., Miller, P. A., Melton, J. R., Morino, I., Müller, J., Murguía-Flores, F., Naik, V., Niwa, Y., Noce, S., O'Doherty, S., Parker, R. J., Peng, C., Peng, S., Peters, G. P., Prigent, C., Prinn, R., Ramonet, M., Regnier, P., Riley, W. J., Rosentreter, J. A., Segers, A., Simpson, I. J., Shi, H., Smith, S. J., Steele, L. P., Thornton, B. F., Tian, H., Tohjima, Y., Tubiello, F. N., Tsuruta, A., Viovy, N., Voulgarakis, A., Weber, T. S., van Weele, M., van der Werf, G. R., Weiss, R. F., Worthy, D., Wunch, D., Yin, Y., Yoshida, Y., Zhang, W., Zhang, Z., Zhao, Y., Zheng, B., Zhu, Q., Zhu, Q., and Zhuang, Q.: The Global Methane Budget 2000–2017, *Earth Syst. Sci. Data*, 12, 1561–1623, <https://doi.org/10.5194/essd-12-1561-2020>, 2020.

Sayers, M.J., Grimm, A.G., Shuchman, R.A., Deines, A.M., Bunnell, D.B., Raymer, Z.B., Rogers, M.W., Woelmer, W., Bennion, D.H., Brooks, C.N., Whitley, M.A.A., Warner, D.M., and J. Mychek-Londer: A new method to generate a high-resolution global distribution map of lake chlorophyll, *International Journal of Remote Sensing*, 36:7, 1942–1964, DOI: 10.1080/01431161.2015.1029099, 2015.

Schepers, D., Guerlet, S., Butz, A., Landgraf, J., Frankenberg, C., Hasekamp, O., Blavier, J. F., Deutscher, N. M., Griffith, D. W. T., Hase, F., Kyro, E., Morino, I., Sherlock, V., Sussmann, R. and Aben, I.: Methane retrievals from Greenhouse Gases Observing Satellite (GOSAT) shortwave infrared measurements: Performance comparison of proxy and physics retrieval algorithms, *J. Geophys. Res. Atmospheres*, 117, D10, doi:10.1029/2012jd017549, 2012.

Schmale O, Greinert J, Rehder G (2005) Methane emission from high-intensity marine gas seeps in the Black Sea into the atmosphere. *Geophys Res Lett* 32:L07609. doi:10.1029/2004GL021138, 2005

Schmid, M., Batist, M.D., Granin, N.G., Kapitanov, V.A., McGinnis, D.F., Mizandrontsev, I.B., Obzhairov, A.I., and Wüest, A.. Sources and sinks of methane in Lake Baikal: A synthesis of measurements and modelling. *Limnol. Oceanogr.*, 52(5), 1824–1837. doi: 10.4319/lo.2007.52.5.1824, 2007

Schneising, O., Burrows, J. P., Dickerson, R. R., Buchwitz, M., Reuter, M. and Bovensmann, H.: Remote sensing of fugitive methane emissions from oil and gas production in North American tight geologic formations, *Earths Future*, 2, 548–558, doi:10.1002/2014EF000265, 2014.

Schorn, S., S. Ahmerkamp, E. Bullock, and others. : Diverse methylotrophic methanogenic archaea cause high methane emissions from seagrass meadows. *Proc. Natl. Acad. Sci.* **119**: 1–12. doi:10.1073/pnas.2106628119, 2022

Schuld, K. N., Mund, J., Aalto, T., Arlyn Andrews, Apadula, F., Jgor Arduini, Arnold, S., Baier, B., Bani, L., Bartyzel, J., Bergamaschi, P., Biermann, T., Biraud, S. C., Pierre-Eric Blanc, Boenisch, H., Brailsford, G., Brand, W. A., Brunner, D., Bui, T. P. V., ... Mirosław Zimnoch. : *Multi-laboratory compilation of atmospheric carbon dioxide data for the period 1983-2022: obspack ch4 1 GLOBALVIEWplus v6.0 2023-12-01* [Data set]. NOAA Global Monitoring Laboratory. <https://doi.org/10.25925/20231001>, 2023

Schuur, E.A., Abbott, B.W., Commane, R., Emakovich, J., Euskirchen, E., Hugelius, G., Grosse, G., Jones, M., Koven, C., Leshyk, V. and Lawrence, D. (2022) Permafrost and climate change: carbon cycle feedbacks from the warming Arctic. *Annual Review of Environment and Resources*, 47, pp.343-371. <https://doi.org/10.1146/annurev-environ-012220-011847>, 2022

Schwietzke, S., Sherwood, O. A., Bruhwiler, L. M. P., Miller, J. B., Etiope, G., Dlugokencky, E. J., Michel, S. E., Arling, V. A., Vaughn, B. H., White, J. W. C. and Tans, P. P.: Upward revision of global fossil fuel methane emissions based on isotope database, *Nature*, 538(7623), 88–91, doi:10.1038/nature19797, 2016.

Segers, A., Steinke, T., and Houweling, S.: Description of the CH4 Inversion Production Chain, CAMS (Copernicus Atmospheric Monitoring Service) Report. [online] Available from: [https://atmosphere.copernicus.eu/sites/default/files/2022-10/CAMS255\\_2021SC1\\_D55.5.2.1-2021CH4\\_202206\\_production\\_chain\\_CH4\\_v1.pdf](https://atmosphere.copernicus.eu/sites/default/files/2022-10/CAMS255_2021SC1_D55.5.2.1-2021CH4_202206_production_chain_CH4_v1.pdf) (Accessed 1 février 2024), 2022.

Shen, L., Gautam, R., Omara, M., Zavala-Araiza, D., Maasakkers, J. D., Scarpelli, T. R., Lorente, A., Lyon, D., Sheng, J., Varon, D. J., Nesser, H., Qu, Z., Lu, X., Sulprizio, M. P., Hamburg, S. P., and Jacob, D. J.: Satellite quantification of oil and natural gas methane emissions in the US and Canada including contributions from individual basins, *Atmos. Chem. Phys.*, 22, 11203–11215, <https://doi.org/10.5194/acp-22-11203-2022>, 2022.

Shen, L., Jacob, D.J., Gautam, R. et al. National quantifications of methane emissions from fuel exploitation using high resolution inversions of satellite observations. *Nat Commun* 14, 4948 , <https://doi.org/10.1038/s41467-023-40671-6>, 2023

Sherwen, T., Schmidt, J. A., Evans, M. J., Carpenter, L. J., Großmann, K., Eastham, S. D., Jacob, D. J., Dix, B., Koenig, T. K., Sinreich, R., Ortega, I., Volkamer, R., Saiz-Lopez, A., Prados-Roman, C., Mahajan, A. S., and Ordóñez, C.: Global impacts of tropospheric halogens (Cl, Br, I) on oxidants and composition in GEOS-Chem, *Atmos. Chem. Phys.*, 16, 12239–12271, <https://doi.org/10.5194/acp-16-12239-2016>, 2016.

Shindell, D., Kuylenstierna, J. C. I., Vignati, E., van Dingenen, R., Amann, M., Klimont, Z., Anenberg, S. C., Müller, N., Janssens-Maenhout, G., Raes, F., Schwartz, J., Faluvegi, G., Pozzoli, L., Kupiainen, K., Höglund-Isaksson, L., Emberson, L., Streets, D., Ramanathan, V., Hicks, K., Oanh, N. T. K., Milly, G., Williams, M., Demkine, V. and Fowler, D.: Simultaneously Mitigating Near-Term Climate Change and Improving Human Health and Food Security, *Science*, 335(6065), 183–189, doi:10.1126/science.1210026, 2012.

Shorter, J. H., Mcmanus, J. B., Kolb, C. E., Allwine, E. J., Lamb, B. K., Mosher, B. W., Harriss, R. C., Partchatka, U., Fischer, H., Harris, G. W., Crutzen, P. J. and Karbach, H.-J.: Methane emission measurements in urban areas in Eastern Germany, *J. Atmospheric Chem.*, 124(2), 121–140, 1996.

Shu, S., Jain, A.K. and Khesghi, H.S.: Investigating Wetland and Nonwetland Soil Methane Emissions and Sinks Across the Contiguous United States Using a Land Surface Model, *Global Biogeochem. Cycles*, 34: e2019GB006251, <https://doi-org.insu.bib.cnrs.fr/10.1029/2019GB006251>, 2020

Simpson, I. J., Thurtell, G. W., Kidd, G. E., Lin, M., Demetriades-Shah, T. H., Flitcroft, I. D., Kanemasu, E. T., Nie, D., Bronson, K. F. and Neue, H. U.: Tunable diode laser measurements of methane fluxes from an irrigated rice paddy field in the Philippines, *J. Geophys. Res. Atmospheres*, 100(D4), 7283–7290, doi:10.1029/94jd03326, 1995.

Simpson, I. J., Sulbaek Andersen, M. P., Meinardi, S., Bruhwiler, L., Blake, N. J., Helmig, D., Rowland, F. S. and Blake, D. R.: Long-term decline of global atmospheric ethane concentrations and implications for methane, *Nature*, 488(7412), 490–494, doi:10.1038/nature11342, 2012.

Smith I.R., Grasby S.E., Lane L.S.: An investigation of gas seeps and aquatic chemistry in Fisherman Lake, southwest Northwest Territories. Geological Survey of Canada, Current Research 2005-A3, 8 p., 2005

Solomon EA, Kastner M, MacDonald IR, Leifer I: Considerable methane fluxes to the atmosphere from hydrocarbon seeps in the Gulf of Mexico. *Nat Geosci* 2:561–565, 2009

Spahni, R., Wania, R., Neef, L., van Weele, M., Pison, I., Bousquet, P., Frankenberg, C., Foster, P. N., Joos, F., Prentice, I. C. and van Velthoven, P.: Constraining global methane emissions and uptake by ecosystems, *Biogeosciences*, 8(6), 1643–1665, doi:10.5194/bg-8-1643-2011, 2011.

Stanley, E. H., Casson, N. J., Christel, S. T., Crawford, J. T., Loken, L. C. and Oliver, S. K.: The ecology of methane in streams and rivers: patterns, controls, and global significance, *Ecol. Monogr.*, doi:10.1890/15-1027, 2016.

Stanley, K. M., Grant, A., O'Doherty, S., Young, D., Manning, A. J., Stavert, A. R., Spain, T. G., Salameh, P. K., Harth, C. M., Simmonds, P. G., Sturges, W. T., Oram, D. E. and Derwent, R. G.: Greenhouse gas measurements from a UK network of tall towers: technical description and first results, *Atmospheric Meas. Tech.*, 11(3), 1437–1458,

doi:10.5194/amt-11-1437-2018, 2018.

Stanley, E. H., Loken, L. C., Casson, N. J., Oliver, S. K., Sponseller, R. A., Wallin, M. B., Zhang, L., and Rocher-Ros, G.: GRiMeDB: the Global River Methane Database of concentrations and fluxes, *Earth Syst. Sci. Data*, **15**, 2879–2926, <https://doi.org/10.5194/essd-15-2879-2023>, 2023.

Stavert, A. R., Saunio, M., Canadell, J. G., Poulter, B., Jackson, R. B., Regnier, P., Lauerwald, R., Raymond, P. A., Allen, G. H., Patra, P. K., Bergamaschi, P., Bousquet, P., Chandra, N., Ciais, P., Gustafson, A., Ishizawa, M., Ito, A., Kleinen, T., Maksyutov, S., Joe McNorton, Joe R. Melton, Jurek Müller, Yosuke Niwa, Shushi Peng, William J. Riley, Arjo Segers, Hanqin Tian, Aki Tsuruta, Yi Yin, Zhen Zhang, Bo Zheng, Zhuang, Q. Regional trends and drivers of the global methane budget. *Global Change Biology*, **28**, 182–200. <https://doi.org/10.1111/gcb.15901>, 2021

Steele, L. P., Fraser, P. J., Rasmussen, R. A., Khalil, M. A. K., Conway, T. J., Crawford, A. J., Gammon, R. H., Masarie, K. A. and Thoning, K. W.: The global distribution of methane in the troposphere, *J. Atmospheric Chem.*, **5**, 125–171, 1987.

Stevenson, D. S., Derwent, R. G., Wild, O., and Collins, W. J.: COVID-19 lockdown emission reductions have the potential to explain over half of the coincident increase in global atmospheric methane, *Atmos. Chem. Phys.*, **22**, 14243–14252, <https://doi.org/10.5194/acp-22-14243-2022>, 2022.

Stocker, B. D., Spahn, R. and Joos, F.: DYPTOP: a cost-efficient TOPMODEL implementation to simulate sub-grid spatio-temporal dynamics of global wetlands and peatlands, *Geosci. Model Dev.*, **7**(6), 3089–3110, doi:10.5194/gmd-7-3089-2014, 2014.

Strauss, J., Abbott, B. W., Hugelius, G., Schuur, E., Treat, C., Fuchs, M., Schädel, C., Ulrich, M., Turetsky, M., Keuschnig, M. and Biasi, C. (2021) Chapter 9. Permafrost. In *FAO Recarbonizing global soils—A technical manual of recommended management practices: Volume 2—Hot spots and bright spots of soil organic carbon*, p.130, 2021

Strode, S. A., Wang, J. S., Manyin, M., Duncan, B., Hossaini, R., Keller, C. A., Michel, S. E., and White, J. W. C.: Strong sensitivity of the isotopic composition of methane to the plausible range of tropospheric chlorine, *Atmos. Chem. Phys.*, **20**, 8405–8419, <https://doi.org/10.5194/acp-20-8405-2020>, 2020.

Sugimoto, A., Inoue, T., Kitibutr, N., Abe, T.: Methane oxidation by termite mounds estimate by the carbon isotope composition of methane. *Glob. Biogeochem. Cy.* **12**, 595-605. 1998.

Sweeney, C., Karion, A., Wolter, S., Newberger, T., Guenther, D., Higgs, J. A., Andrews, A. E., Lang, P. M., Neff, D., Dlugokencky, E., Miller, J. B., Montzka, S. A., Miller, B. R., Masarie, K. A., Biraud, S. C., Novelli, P. C., Crotwell, M., Crotwell, A. M., Thoning, K. and Tans, P. P.: Seasonal climatology of CO<sub>2</sub> across North America from aircraft measurements in the NOAA/ESRL Global Greenhouse Gas Reference Network, *J. Geophys. Res. Atmospheres*, **120**(10), 5155–5190, doi:10.1002/2014jd022591, 2015.

Tan, Z. and Zhuang, Q.: Methane emissions from pan-Arctic lakes during the 21st century: An analysis with process-

based models of lake evolution and biogeochemistry, *J. Geophys. Res. Biogeosciences*, 120(12), 2641–2653, doi:10.1002/2015JG003184, 2015.

Tans, P. and Zwellberg, C.: 17th WMO/IAEA Meeting on Carbon Dioxide, Other Greenhouse Gases and Related Tracers Measurement Techniques (GGMT-2013), GAW Report, WMO, Geneva. [online] Available from: [https://library.wmo.int/index.php?lvl=notice\\_display&id=16373#XnpBPW7jIq8](https://library.wmo.int/index.php?lvl=notice_display&id=16373#XnpBPW7jIq8), 2014.

Taranu, Z.E., I. Gregory-Eaves, P.R. Leavitt, L. Bunting, T. Buchaca, J. Catalan, I. Domaizon, P. Guilizzoni, A. Lami, S. McGowan, H. Moorhouse, G. Morabito, F.R. Pick, M.A. Stevenson, P.L. Thompson, and R.D. Vinebrooke: Acceleration of cyanobacterial dominance in north temperate-subarctic lakes during the Anthropocene. *Ecology Letters*, 18(4): p. 375–384., 2015

Taylor, P. G., Bilinski, T. M., Fancher, H. R. F., Cleveland, C. C., Nemergut, D. R., Weintraub, S. R., Wieder, W. R. and Townsend, A. R.: Palm oil wastewater methane emissions and bioenergy potential, *Nat. Clim. Change*, 4(3), 151–152, doi:10.1038/nclimate2154, 2014.

le Texier, H., Solomon, S. and Garcia, R. R.: The role of molecular hydrogen and methane oxidation in the water vapour budget of the stratosphere, *Q. J. R. Meteorol. Soc.*, 114(480), 281–295, doi:10.1002/qj.49711448002, 1988.

Thanwerdas, J., Saunio, M., Berchet, A., Pison, I., Vaughn, B. H., Michel, S. E., and Bousquet, P.: Variational inverse modeling within the Community Inversion Framework v1.1 to assimilate  $\delta^{13}\text{C}(\text{CH}_4)$  and  $\text{CH}_4$ : a case study with model LMDz-SACS, *Geosci. Model Dev.*, 15, 4831–4851, <https://doi.org/10.5194/gmd-15-4831-2022>, 2022a.

Thanwerdas, J., Saunio, M., Pison, I., Hauglustaine, D., Berchet, A., Baier, B., Sweeney, C., and Bousquet, P.: How do  $\text{Cl}$  concentrations matter for the simulation of  $\text{CH}_4$  and  $\delta^{13}\text{C}(\text{CH}_4)$  and estimation of the  $\text{CH}_4$  budget through atmospheric inversions?, *Atmos. Chem. Phys.*, 22, 15489–15508, <https://doi.org/10.5194/acp-22-15489-2022>, 2022b.

Thanwerdas, J., Saunio, M., Berchet, A., Pison, I., and Bousquet, P.: Investigation of the renewed methane growth post-2007 with high-resolution 3-D variational inverse modeling and isotopic constraints, *Atmos. Chem. Phys.*, 24, 2129–2167, <https://doi.org/10.5194/acp-24-2129-2024>, 2024.

Thompson, R. L., Montzka, S. A., Vollmer, M. K., Arduini, J., Crotwell, M., Krummel, P. B., Lunder, C., Mühle, J., O'Doherty, S., Prinn, R. G., Reimann, S., Vimont, I., Wang, H., Weiss, R. F., and Young, D.: Estimation of the atmospheric hydroxyl radical oxidative capacity using multiple hydrofluorocarbons (HFCs), *Atmos. Chem. Phys.*, 24, 1415–1427, <https://doi.org/10.5194/acp-24-1415-2024>, 2024.

Thoning, K. W., Tans, P. P. and Komhyr, W. D.: Atmospheric carbon dioxide at Mauna Loa Observatory. 2. Analysis of the NOAA GMCC data, 1974,1985, *J. Geophys. Res.*, 94(D6), 8549–8565, 1989.

Thorneloe, S. A., Barlaz, M. A., Peer, R., Huff, L. C., Davis, L. and Mangino, J.: Waste management, in *Atmospheric Methane: Its Role in the Global Environment*, edited by M. Khalil, pp. 234–262, Springer-Verlag, New York., 2000.

Thornton, B. F., Prytherch, J., Andersson, K., Brooks, I. M., Salisbury, D., Tjernström, M. and Crill, P. M.: Shipborne eddy covariance observations of methane fluxes constrain Arctic sea emissions, *Sci. Adv.*, 6(5), eaay7934,

doi:10.1126/sciadv.aay7934, 2020.

- Thornton B.F., Etiope G., Schwietzke S., Milkov A.V., Klusman R.W., Judd A., Oehler D.Z.: Conflicting estimates of natural geologic methane emissions. *Elem. Sci. Anth.*, 9, 1, doi:https://doi.org/10.1525/elementa.2021.00031, 2021
- Thornton, J. A., Kercher, J. P., Riedel, T. P., Wagner, N. L., Cozic, J., Holloway, J. S., Dubé, W. P., Wolfe, G. M., Quinn, P. K., Middlebrook, A. M., Alexander, B. and Brown, S. S.: A large atomic chlorine source inferred from mid-continental reactive nitrogen chemistry, *Nature*, 464(7286), 271–274, doi:10.1038/nature08905, 2010.
- Thorpe, A. K., Kort, E. A., Cusworth, D. H., Ayasse, A. K., Bue, B. D., Yadav, V., Thompson, D. R., Frankenberg, C., Hermer, J., Falk, M., Green, R. O., Miller, C. E., and Duren, R. M.: Methane emissions decline from reduced oil, natural gas, and refinery production during COVID-19, *Environmental Research Communications*, 5, 021006, 2023
- Tian, H., Xu, X., Liu, M., Ren, W., Zhang, C., Chen, G. and Lu, C.: Spatial and temporal patterns of CH<sub>4</sub> and N<sub>2</sub>O fluxes in terrestrial ecosystems of North America during 1979–2008: application of a global biogeochemistry model, *Biogeosciences*, 7(9), 2673–2694, doi:10.5194/bg-7-2673-2010, 2010.
- Tian, H., Xu, X., Lu, C., Liu, M., Ren, W., Chen, G., Melillo, J. and Liu, J.: Net exchanges of CO<sub>2</sub>, CH<sub>4</sub>, and N<sub>2</sub>O between China's terrestrial ecosystems and the atmosphere and their contributions to global climate warming, *J. Geophys. Res. Biogeosciences*, 116, G2, doi:10.1029/2010jg001393, 2011.
- Tian, H., Chen, G., Lu, C., Xu, X., Ren, W., Zhang, B., Banger, K., Tao, B., Pan, S., Liu, M., Zhang, C., Bruhwiler, L. and Wofsy, S.: Global methane and nitrous oxide emissions from terrestrial ecosystems due to multiple environmental changes, *Ecosyst. Health Sustain.*, 1(1), 1–20, doi:doi:10.1890/ehs14-0015.1, 2015.
- Tian, H., Lu, C., Ciais, P., Michalak, A. M., Canadell, J. G., Saikawa, E., Huntzinger, D. N., Gurney, K. R., Sitch, S., Zhang, B., Yang, J., Bousquet, P., Bruhwiler, L., Chen, G., Dlugokencky, E., Friedlingstein, P., Melillo, J., Pan, S., Poulter, B., Prinn, R., Saunio, M., Schwalm, C. R. and Wofsy, S. C.: The terrestrial biosphere as a net source of greenhouse gases to the atmosphere, *Nature*, 531(7593), 225–228, doi:10.1038/nature16946, 2016.
- Tian, H., Xu, R., Canadell, J. G., Thompson, R. L., Winiwarter, W., Suntharalingam, P., Davidson, E. A., Ciais, P., Jackson, R. B., Janssens-Maenhout, G., Prather, M. J., Regnier, P., Pan, N., Pan, S., Peters, G. P., Shi, H., Tubiello, F. N., Zaehle, S., Zhou, F., Arneeth, A., Battaglia, G., Berthet, S., Bopp, L., Bouwman, A. F., Buitenhuis, E. T., Chang, J., Chipperfield, M. P., Dangal, S. R. S., Dlugokencky, E., Elkins, J. W., Eyre, B. D., Fu, B., Hall, B., Ito, A., Joos, F., Krummel, P. B., Landolfi, A., Laruelle, G. G., Lauerwald, R., Li, W., Lienert, S., Maavara, T., MacLeod, M., Millet, D. B., Olin, S., Patra, P. K., Prinn, R. G., Raymond, P. A., Ruiz, D. J., van der Werf, G. R., Vuichard, N., Wang, J., Weiss, R. F., Wells, K. C., Wilson, C., Yang, J., and Yao, Y.: A comprehensive quantification of global nitrous oxide sources and sinks, *Nature*, 586, 248–256, https://doi.org/10.1038/s41586-020-2780-0, 2020.
- Tian, H., Yao, Y., Li, Y., Shi, H., Pan, S., Najjar, R. G., et al. (2023). Increased terrestrial carbon export and CO<sub>2</sub> evasion from global inland waters since the preindustrial era. *Global Biogeochemical Cycles*, 37, e2023GB007776. https://doi.org/10.1029/2023GB007776, 2023

Tibrewal, K., Ciais, P., Saunio, M., Martinez, A., Lin, X., Thanwerdas, J., Deng, Z., Chevallier, F., Giron, C., Albergel, C., Tanaka, K., Patra, P., Tsuruta, A., Zheng, B., Belikov, D., Niwa, Y., Janardanan, R., Maksyutov, S., Segers, A., Tzompa-Sosa, Z. A., Bousquet, P., and Sciare, J.: Assessment of methane emissions from oil, gas and coal sectors across inventories and atmospheric inversions, *Commun. Earth Environ.* 5, 26, <https://doi.org/10.1038/s43247-023-01190-w>, 2024.

Tiwari, Y. K. and Kumar, K. R.: GHG observation programs in India, *Asian GAWgreenhouse Gases 3 Korea Meteorol. Adm. Chungnam South Korea*, 2012.

Tsuruta, A., Aalto, T., Backman, L., Hakkarainen, J., Laan-Luijckx, I. T. van der, Krol, M. C., Spahni, R., Houweling, S., Laine, M., Dlugokencky, E., Gomez-Pelaez, A. J., Schoot, M. van der, Langenfelds, R., Ellul, R., Arduini, J., Apadula, F., Gerbig, C., Feist, D. G., Kivi, R., Yoshida, Y., and Peters, W.: Global methane emission estimates for 2000–2012 from CarbonTracker Europe-CH<sub>4</sub> v1.0, *Geosci. Model Dev.*, 10(3), 1261–1289, doi:10.5194/gmd-10-1261-2017, 2017.

Tsuruta, A., Kivimäki, E., Lindqvist, H., Karppinen, T., Backman, L., Hakkarainen, J., Schneising, O., Buchwitz, M., Lan, X., Kivi, R., et al. CH<sub>4</sub> Fluxes Derived from Assimilation of TROPOMI XCH<sub>4</sub> in CarbonTracker Europe-CH<sub>4</sub>: Evaluation of Seasonality and Spatial Distribution in the Northern High Latitudes, *Remote Sens.* 2023, 15, 1620, <https://doi.org/10.3390/rs15061620>, 2023.

Tubiello, F. N.: Greenhouse Gas Emissions Due to Agriculture, in *Elsevier Encyclopedia of Food Systems*, 2019.

Tubiello, F. N., Salvatore, M., Rossi, S., Ferrara, A., Fitton, N., and Smith, P.: The FAOSTAT database of greenhouse gas emissions from agriculture, *Environ. Res. Lett.*, 8(1), 015009, doi:10.1088/1748-9326/8/1/015009, 2013.

Tubiello, F. N., Karl, K., Flammini, A., Gütschow, J., Obli-Laryea, G., Conchedda, G., Pan, X., Qi, S. Y., Halldórudóttir, H., Wanner, N., Quadrelli, R., Rocha Souza, L., Benoit, P., Hayek, M., Sandalow, D., Mencos Contreras, E., Rosenzweig, C., Rosero Moncayo, J., Conforti, P., and Torero, M.: Pre- and post-production processes increasingly dominate greenhouse gas emissions from agri-food systems, *Earth Syst. Sci. Data*, 14, 1795–1809, <https://doi.org/10.5194/essd-14-1795-2022>, 2022.

Turetsky, M. R., Kotowska, A., Bubier, J., Dise, N. B., Crill, P., Hornibrook, E. R. C., Minkinen, K., Moore, T. R., Myers-Smith, I. H., Nykänen, H., Olefeldt, D., Rinne, J., Saarnio, S., Shurpali, N., Tuittila, E.-S., Waddington, J. M., White, J. R., Wickland, K. P., and Wilkening, M.: A synthesis of methane emissions from 71 northern, temperate, and subtropical wetlands, *Glob. Change Biol.*, 20(7), 2183–2197, doi:10.1111/gcb.12580, 2014.

Turetsky, M. R., Abbott, B. W., Jones, M. C., Anthony, K. W., Olefeldt, D., Schuur, E. A. G., et al.: Carbon release through abrupt permafrost thaw, *Nature Geoscience*, 13(2), 138–143, <https://doi.org/10.1038/s41561-019-0526-0>, 2020.

Turner, A. J., Fung, I., Naik, V., Horowitz, L. W., and Cohen, R. C.: Modulation of hydroxyl variability by ENSO in the absence of external forcing, *Proc. Natl. Acad. Sci.*, 115(36), 8931–8936, doi:10.1073/pnas.1807532115, 2018.



Turner, A. J., Frankenberg, C. and Kort, E. A.: Interpreting contemporary trends in atmospheric methane, *Proc. Natl. Acad. Sci.*, 116(8), 2805, doi:10.1073/pnas.1814297116, 2019.

UNEP, United Nations Environment Programme and Climate and Clean Air Coalition. Global Methane Assessment: Benefits and Costs of Mitigating Methane Emissions. Nairobi: United Nations Environment Programme., 2021

UNEP, United Nations Environment Programme/Climate and Clean Air Coalition. Global Methane Assessment: 2030 Baseline Report. Nairobi, 2022

USEPA: Greenhouse Gas Emissions Estimation Methodologies for Biogenic Emissions from Selected Source Categories: Solid Waste Disposal Wastewater Treatment Ethanol Fermentation, Measurement Policy Group, US EPA. [online] Available from: [https://www3.epa.gov/ttnchie1/efpac/ghg/GHG\\_Biogenic\\_Report\\_draft\\_Dec1410.pdf](https://www3.epa.gov/ttnchie1/efpac/ghg/GHG_Biogenic_Report_draft_Dec1410.pdf) (Accessed 11 March 2020a), 2010a.

USEPA: Office of Atmospheric Programs (6207J), Methane and Nitrous Oxide Emissions From Natural Sources, U.S. Environmental Protection Agency, EPA 430-R-10-001. Available online at <http://nepis.epa.gov/>, Washington, DC 20460., 2010b.

USEPA: Draft: Global Anthropogenic Non-CO<sub>2</sub> Greenhouse Gas Emissions: 1990-2030. EPA 430-R-03-002, United States Environmental Protection Agency, Washington D.C., 2011.

USEPA: Global Anthropogenic Non-CO<sub>2</sub> Greenhouse Gas Emissions 1990-2030, EPA 430-R-12-006, US Environmental Protection Agency, Washington DC., 2012.

USEPA: Draft Inventory of U.S. Greenhouse gas Emissions and Sinks: 1990-2014. EPA 430-R-16-002. February 2016. U.S. Environmental protection Agency, Washington, DC, USA., 2016.

USEPA: Global Non-CO<sub>2</sub> Greenhouse Gas Emission Projections & Mitigation Potential: 2015-2050, EPA-430-R-19-010, U.S. Environmental protection Agency, Washington, DC, USA., 2019

Valentine, D. W., Holland, E. A. and Schimel, D. S.: Ecosystem and physiological controls over methane production in northern wetlands, *J. Geophys. Res.*, 99(D1), 1563–1571, 1994.

Vardag, S. N., Hammer, S., O'Doherty, S., Spain, T. G., Wastine, B., Jordan, A. and Levin, I.: Comparisons of continuous atmospheric CH<sub>4</sub>, CO<sub>2</sub> and N<sub>2</sub>O measurements &ndash; results from a travelling instrument campaign at Mace Head, *Atmospheric Chem. Phys.*, 14(16), 8403–8418, doi:10.5194/acp-14-8403-2014, 2014.

VODCA2GPP – a new, global, long-term (1988–2020) gross primary production dataset from microwave remote sensing, *Earth Syst. Sci. Data*, 14, 1063–1085, <https://doi.org/10.5194/essd-14-1063-2022>, 2022.

Voulgarakis, A., Naik, V., Lamarque, J. F., Shindell, D. T., Young, P. J., Prather, M. J., Wild, O., Field, R. D., Bergmann, D., Cameron-Smith, P., Cionni, I., Collins, W. J., Dalsøren, S. B., Doherty, R. M., Eyring, V., Faluvegi, G., Folberth, G. A., Horowitz, L. W., Josse, B., MacKenzie, I. A., Nagashima, T., Plummer, D. A., Righi, M., Rumbold, S. T., Stevenson, D. S., Strode, S. A., Sudo, K., Szopa, S. and Zeng, G.: Analysis of present day and future OH and methane

lifetime in the ACCMIP simulations, *Atmospheric Chem. Phys.*, 13(5), 2563–2587, doi:10.5194/acp-13-2563-2013, 2013.

Voulgarakis, A., Marlier, M. E., Faluvegi, G., Shindell, D. T., Tsigaridis, K. and Mangeon, S.: Interannual variability of tropospheric trace gases and aerosols: The role of biomass burning emissions, *J. Geophys. Res. Atmospheres*, 120(14), 7157–7173, doi:10.1002/2014jd022926, 2015.

Wallmann, K., Pinero, E., Burwicz, E., Haeckel, M., Hensen, C., Dale, A. and Ruepke, L.: The Global Inventory of Methane Hydrate in Marine Sediments: A Theoretical Approach, *Energies*, 5(7), 2449, 2012.

Walter Anthony, K.M., Anthony, P., Grosse, G. and Chanton, J.: Geologic methane seeps along boundaries of Arctic permafrost thaw and melting glaciers, *Nature Geoscience*, 5(6), pp.419-426., DOI: 10.1038/ngeo1480, 2012

Wang, F., Maksyutov, S., Tsuruta, A., Janardanan, R., Ito, A., Sasakawa, M., Machida, T., Morino, I., Yoshida, Y., Kaiser, J. W., Janssens-Maenhout, G., Dlugokencky, E. J., Mammarella, I., Lavric, J. V. and Matsunaga, T.: Methane Emission Estimates by the Global High-Resolution Inverse Model Using National Inventories, *Remote Sens.*, 11(21), 2489, doi:10.3390/rs11212489, 2019a.

Wang, G., X. Xia, S. Liu, L. Zhang, S. Zhang, J. Wang, N. Xi, and Q. Zhang, Intense methane ebullition from urban inland waters and its significant contribution to greenhouse gas emissions, *Water Research*, 189: p. 116654, 2021a

Wang, X., Jacob, D. J., Eastham, S. D., Sulprizio, M. P., Zhu, L., Chen, Q., Alexander, B., Sherwen, T., Evans, M. J., Lee, B. H., Haskins, J. D., Lopez-Hilfiker, F. D., Thornton, J. A., Huey, G. L. and Liao, H.: The role of chlorine in global tropospheric chemistry, *Atmospheric Chem. Phys.*, 19(6), 3981–4003, doi:10.5194/acp-19-3981-2019, 2019b.

Wang, X., Jacob, D. J., Downs, W., Zhai, S., Zhu, L., Shah, V., Holmes, C. D., Sherwen, T., Alexander, B., Evans, M. J., Eastham, S. D., Neuman, J. A., Veres, P. R., Koenig, T. K., Volkamer, R., Huey, L. G., Bannan, T. J., Percival, C. J., Lee, B. H., and Thornton, J. A.: Global tropospheric halogen (Cl, Br, I) chemistry and its impact on oxidants, *Atmos. Chem. Phys.*, 21, 13973–13996, <https://doi.org/10.5194/acp-21-13973-2021>, 2021b.

Wang, Z., Deutscher, N. M., Warneke, T., Notholt, J., Dils, B., Griffith, D. W. T., Schmidt, M., Ramonet, M. and Gerbig, C.: Retrieval of tropospheric column-averaged CH<sub>4</sub> mole fraction by solar absorption FTIR-spectrometry using N<sub>2</sub>O as a proxy, *Atmospheric Meas. Tech.*, 7(10), 3295–3305, doi:10.5194/amt-7-3295-2014, 2014.

Wang, Z.-P., Gu, Q., Deng, F.-D., Huang, J.-H., Megonigal, J. P., Yu, Q., Lü, X.-T., Li, L.-H., Chang, S., Zhang, Y.-H., Feng, J.-C. and Han, X.-G.: Methane emissions from the trunks of living trees on upland soils, *New Phytol.*, 211(2), 429–439, doi:10.1111/nph.13909, 2016.

Wania, R., I. Ross and I. C. Prentice: Implementation and evaluation of a new methane model within a dynamic global vegetation model: LPJ-WHyMe v1.3, *Geosci. Model Dev. Discuss.*, 3, 1–59, 2010.

Wania, R., Melton, J. R., Hodson, E. L., Poulter, B., Ringeval, B., Spahni, R., Bohn, T., Avis, C. A., Chen, G., Eliseev, A. V., Hopcroft, P. O., Riley, W. J., Subin, Z. M., Tian, H., van Bodegom, P. M., Kleinen, T., Yu, Z. C., Singarayer, J. S., Zurcher, S., Lettenmaier, D. P., Beerling, D. J., Denisov, S. N., Prigent, C., Papa, F. and Kaplan, J. O.: Present state

of global wetland extent and wetland methane modelling: Methodology of a model inter-comparison project (WETCHIMP), *Geosci. Model Dev.*, 6(3), 617–641, 2013.

Wassmann, R., Lantin, R. S., Neue, H. U., Buendia, L. V., Corton, T. M. and Lu, Y.: Characterization of methane emissions in Asia III: Mitigation options and future research needs, *Nutr. Cycl. Agroecosystems*, 58, 23–36, 2000.

Weber, T., Wiseman, N. A. and Kock, A.: Global ocean methane emissions dominated by shallow coastal waters, *Nat. Commun.*, 10(1), 1–10, doi:10.1038/s41467-019-12541-7, 2019.

Wells, N. S., J. J. Chen, D. T. Maher, P. Huang, D. V. Erler, M. Hipsey, and B. D. Eyre: Changing sediment and surface water processes increase CH<sub>4</sub> emissions from human-impacted estuaries, *Geochim. Cosmochim. Acta* **280**, 130–147, doi:10.1016/j.gca.2020.04.020, 2020.

van der Werf, G. R., Randerson, J. T., Giglio, L., Collatz, G. J., Mu, M., Kasibhatla, P. S., Morton, D. C., DeFries, R. S., Jin, Y. and van Leeuwen, T. T.: Global fire emissions and the contribution of deforestation, savanna, forest, agricultural, and peat fires (1997–2009), *Atmospheric Chem. Phys.*, 10(23), 11,707–11,735, 2010.

van der Werf, G. R., Randerson, J. T., Giglio, L., Leeuwen, T. T. van, Chen, Y., Rogers, B. M., Mu, M., Marle, M. J. E. van, Morton, D. C., Collatz, G. J., Yokelson, R. J. and Kasibhatla, P. S.: Global fire emissions estimates during 1997–2016, *Earth Syst. Sci. Data*, 9(2), 697–720, doi:10.5194/essd-9-697-2017, 2017.

Whalen, S. C.: Biogeochemistry of Methane Exchange between Natural Wetlands and the Atmosphere, *Environ. Eng. Sci.*, 22(1), 73–94, doi:10.1089/ees.2005.22.73, 2005.

Wiedinmyer, C., Kimura, Y., McDonald-Buller, E. C., Emmons, L. K., Buchholz, R. R., Tang, W., Seto, K., Joseph, M. B., Barsanti, K. C., Carlton, A. G., and Yokelson, R.: The Fire Inventory from NCAR version 2.5: an updated global fire emissions model for climate and chemistry applications, *EGUsphere* [preprint], <https://doi.org/10.5194/egusphere-2023-124>, 2023.

Wik, M., Thornton, B. F., Bastviken, D., Uhlbäck, J. and Crill, P. M.: Biased sampling of methane release from northern lakes: A problem for extrapolation, *Geophys. Res. Lett.*, 43(3), 1256–1262, doi:10.1002/2015gl066501, 2016a.

Wik, M., Varner, R. K., Anthony, K. W., MacIntyre, S. and Bastviken, D.: Climate-sensitive northern lakes and ponds are critical components of methane release, *Nat. Geosci.*, 9(2), 99–105, doi:10.1038/ngeo2578, 2016b.

Wild, B., Teubner, I., Moesinger, L., Zotta, R.-M., Forkel, M., van der Schalie, R., Sitch, S., and Dorigo, W.: VODCA2GPP – a new, global, long-term (1988–2020) gross primary production dataset from microwave remote sensing, *Earth Syst. Sci. Data*, 14, 1063–1085, <https://doi.org/10.5194/essd-14-1063-2022>, 2022.

Winderlich, J., Chen, H., Gerbig, C., Seifert, T., Kolle, O., Lavrič, J. V., Kaiser, C., Höfer, A. and Heimann, M.: Continuous low-maintenance CO<sub>2</sub>/CH<sub>4</sub>/H<sub>2</sub>O measurements at the Zotino Tall Tower Observatory (ZOTTO) in Central Siberia, *Atmospheric Meas. Tech.*, 3(4), 1113–1128, doi:10.5194/amt-3-1113-2010, 2010.

Wilson, C., Chipperfield, M. P., Gloor, M., Parker, R. J., Boesch, H., McNorton, J., Gatti, L. V., Miller, J. B., Basso, L. S., and Monks, S. A.: Large and increasing methane emissions from eastern Amazonia derived from satellite data,

2010–2018, *Atmos. Chem. Phys.*, **21**, 10643–10669, <https://doi.org/10.5194/acp-21-10643-2021>, 2021.

Wood, T.G. and Sands, W.A. The role of termites in ecosystems. In: Brian, M.V. (Ed.), *Production Ecology of Ants and Termites*. Cambridge University Press, Cambridge, UK, 245–292, 1978.

Woodward G, Perkins D.M., and Brown L. E.: Climate change and freshwater ecosystems: impacts across multiple levels of organization, *Philos Trans R Soc Lond B Biol Sci.*, 365(1549), 2093–106, doi: 10.1098/rstb.2010.0055, 2010

Woodward, G., Gessner, M. O., Giller, P. S., Gulis, V., Hladyz, S., Lecerf, A., Malmqvist, B., McKie, B. G., Tiegs, S. D., Cariss, H., Dobson, M., Elozegi, A., Ferreira, V., Graça, M. A. S., Fleituch, T., Lacoursière, J. O., Nistorescu, M., Pozo, J., Risnoveanu, G., Schindler, M., Vadineanu, A., Vought, L. B.-M. and Chauvet, E.: Continental-Scale Effects of Nutrient Pollution on Stream Ecosystem Functioning, *Science*, 336(6087), 1438–1440, doi:10.1126/science.1219534, 2012.

Woolway R.I, Jones I.D, Maberly S.C, French J.R, Livingstone D.M, Monteith D.T, et al.: Diel Surface Temperature Range Scales with Lake Size, *PLoS ONE* 11(3): e0152466, doi:10.1371/journal.pone.0152466, 2016

Worden, J. R., Bloom, A. A., Pandey, S., Jiang, Z., Worden, H. M., Walker, T. W., Houweling, S. and Röckmann, T.: Reduced biomass burning emissions reconcile conflicting estimates of the post-2006 atmospheric methane budget, *Nat. Commun.*, 8(1), 2227, doi:10.1038/s41467-017-02246-0, 2017.

Wu, Z., Li, J., Sun, Y. *et al.* : Imbalance of global nutrient cycles exacerbated by the greater retention of phosphorus over nitrogen in lakes. *Nat. Geosci.*, 15, 464–468, <https://doi.org/10.1038/s41561-022-00958-7>, 2022

Wuebbles, D. J. and Hayhoe, K.: Atmospheric methane and global change, *Earth-Sci. Rev.*, 57(3–4), 177–210, 2002.

Wunch, D., Toon, G. C., Blavier, J.-F. L., Washenfelder, R. A., Notholt, J., Connor, B. J., Griffith, D. W. T., Sherlock, V. and Wennberg, P. O.: The Total Carbon Column Observing Network, *Philos. Trans. R. Soc. A*, 369(1943), doi:10.1098/rsta.2010.0240, 2011.

Wunch, D., Toon, G. C., Hedelius, J. K., Vizenor, N., Roehl, C. M., Saad, K. M., Blavier, J.-F. L., Blake, D. R. and Wennberg, P. O.: Quantifying the loss of processed natural gas within California’s South Coast Air Basin using long-term measurements of ethane and methane, *Atmospheric Chem. Phys.*, 16(22), 14091–14105, doi:10.5194/acp-16-14091-2016, 2016.

Wunch, D., Jones, D. B. A., Toon, G. C., Deutscher, N. M., Hase, F., Notholt, J., Sussmann, R., Warneke, T., Kuenen, J., Denier van der Gon, H., Fisher, J. A. and Maasakkers, J. D.: Emissions of methane in Europe inferred by total column measurements, *Atmos Chem Phys*, 19(6), 3963–3980, doi:10.5194/acp-19-3963-2019, 2019.

Xiao, K., F. Beulig, H. Røy, B. B. Jørgensen, and N. Risgaard-Petersen: Methylo trophic methanogenesis fuels cryptic methane cycling in marine surface sediment. *Limnol. Oceanogr.* **63**: 1519–1527, doi:10.1002/lno.10788, 2018

Xu, X. F., Tian, H. Q., Zhang, C., Liu, M. L., Ren, W., Chen, G. S., Lu, C. Q. and Bruhwiler, L.: Attribution of spatial and temporal variations in terrestrial methane flux over North America, *Biogeosciences*, 7(11), 3637–3655, doi:10.5194/bg-7-3637-2010, 2010.



Zhang, B. and Chen, G. Q.: China's CH<sub>4</sub> and CO<sub>2</sub> Emissions: Bottom-Up Estimation and Comparative Analysis, *Ecol. Indic.*, 47, 112–122, doi:10.1016/j.ecolind.2014.01.022, 2014.

Zhang, L., X. Xia, S. Liu, S. Zhang, S. Li, J. Wang, G. Wang, H. Gao, Z. Zhang, Q. Wang, W. Wen, R. Liu, Z. Yang, E.H. Stanley, and P.A. Raymond: Significant methane ebullition from alpine permafrost rivers on the East Qinghai–Tibet Plateau, *Nature Geoscience*, 13(5): p. 349–354, 2020

Zhang, L., H. Tian, H. Shi, S. Pan, J. Chang, S. R. S. Dangal, X. Qin, S. Wang, F. N. Tubiello, J. G. Canadell, R. B. Jackson: A 130-year global inventory of methane emissions from livestock: Trends, patterns, and drivers, *Global Change Biology*, 28 (17), 5142–5158. <https://doi.org/10.1111/gcb.16280>, 2022

Zhang, Y., Xiao, X., Wu, X., Zhou, S., Zhang, G., Qin, Y., and Dong, J.: A global moderate resolution dataset of gross primary production of vegetation for 2000–2016, *Sci. Data*, 4, 1–13, <https://doi.org/10.1038/sdata.2017.165>, 2017.

Zhang, Y., Jacob, D. J., Maasakkers, J. D., Sulprizio, M. P., Sheng, J.-X., Gautam, R., and Worden, J.: Monitoring global tropospheric OH concentrations using satellite observations of atmospheric methane, *Atmos. Chem. Phys.*, 18, 15959–15973, <https://doi.org/10.5194/acp-18-15959-2018>, 2018.

Zhang, Z., Zimmermann, N. E., Kaplan, J. O. and Poulter, B.: Modeling spatiotemporal dynamics of global wetlands: comprehensive evaluation of a new sub-grid TOPMODEL parameterization and uncertainties, *Biogeosciences*, 13(5), 1387–1408, doi:10.5194/bg-13-1387-2016, 2016.

Zhang, Z., Fluet-Chouinard, E., Jensen, K., McDonald, K., Hugelius, G., Gumbrecht, T., et al. Development of the global dataset of Wetland Area and Dynamics for Methane Modeling (WAD2M), *Earth System Science Data*, 13(5), 2001–2023. <https://doi.org/10.5194/essd-13-2001-2021>, 2021.

Zhang, Z., Poulter, B., Feldman, A.F., Ying, Q. Ciais, P., Peng, S. and Li, X.: Recent intensification of wetland methane feedback, *Nat. Clim. Chang.* 13, 430–433, <https://doi.org/10.1038/s41558-023-01629-0>, 2023

Zhang, Z., Poulter, B., Melton, J., Riley, W., Allen, G., Beerling D., Bousquet P., Canadell, J., Fluet-Chouinard E., Ciais, P., Gedney, N., Hopcroft, P., Ito, A., Jackson, R., Jain, A., Jensen, K., Joos, F., Kleinen, T., Knox, S., Li, T., Li, X., Liu, X., McDonald, K., McNicol, G., Miller, P., Müller, J., Patra, P., Prigent, C., Peng, C., Peng, S., Qin, Z., Riggs, R., Saunois, M., Sun Q., Tian, H., Xu, X., Yao Y., Yi, X., Zhang, W., Zhu, Q., Zhu, Q., and Zhuang, Q.: Ensemble estimates of global wetland methane emissions over 2000–2020. *Global Change Biology*, in review.

Zhao, J., M. Zhang, W. Xiao, L. Jia, X. Zhang, J. Wang, Z. Zhang, Y. Xie, Y. Pu, S. Liu, Z. Feng, and X. Lee: Large methane emission from freshwater aquaculture ponds revealed by long-term eddy covariance observation. *Agricultural and Forest Meteorology*, 308–309: p. 108600, 2021

Zhao, Y., Saunois, M., Bousquet, P., Lin, X., Berchet, A., Hegglin, M. I., Canadell, J. G., Jackson, R. B., Hauglustaine, D. A., Szopa, S., Stavert, A. R., Abraham, N. L., Archibald, A. T., Bekki, S., Deushi, M., Jöckel, P., Josse, B., Kinnison, D., Kirner, O., Marécal, V., O'Connor, F. M., Plummer, D. A., Revell, L. E., Rozanov, E., Stenke, A., Strode, S., Tilmes, S., Dlugokencky, E. J. and Zheng, B.: Inter-model comparison of global hydroxyl radical (OH) distributions

and their impact on atmospheric methane over the 2000–2016 period, *Atmospheric Chem. Phys.*, 19(21), 13701–13723, doi:10.5194/acp-19-13701-2019, 2019.

Zhao, Y., Saunio, M., Bousquet, P., Lin, X., Berchet, A., Hegglin, M. I., Canadell, J. G., Jackson, R. B., Dlugokencky, E. J., Langenfelds, R. L., Ramonet, M., Worthy, D. and Zheng, B.: Influences of hydroxyl radicals (OH) on top-down estimates of the global and regional methane budgets, *Atmospheric Chem. Phys. Discuss.*, 1–45, doi:10.5194/acp-2019-1208, 2020.

Zhao, Y., Saunio, M., Bousquet, P., Lin, X., Hegglin, M. I., Canadell, J. G., Jackson, R. B., and Zheng, B.: Reconciling the bottom-up and top-down estimates of the methane chemical sink using multiple observations, *Atmos. Chem. Phys.*, 23, 789–807, <https://doi.org/10.5194/acp-23-789-2023>, 2023.

Zheng, B., Chevallier, F., Ciais, P., Yin, Y. and Wang, Y.: On the Role of the Flaming to Smoldering Transition in the Seasonal Cycle of African Fire Emissions, *Geophys. Res. Lett.*, 45(21), 11,998-12,007, doi:10.1029/2018GL079092, 2018a.

Zheng, B., Chevallier, F., Ciais, P., Yin, Y., Deeter, M. N., Worden, H. M., Wang, Y., Zhang, Q. and He, K.: Rapid decline in carbon monoxide emissions and export from East Asia between years 2005 and 2016, *Environ. Res. Lett.*, 13(4), 044007, doi:10.1088/1748-9326/aab2b3, 2018b.

Zheng, B., Chevallier, F., Yin, Y., Ciais, P., Fortems-Cheiney, A., Deeter, M. N., Parker, R. J., Wang, Y., Worden, H. M., and Zhao, Y.: Global atmospheric carbon monoxide budget 2000–2017 inferred from multi-species atmospheric inversions, *Earth Syst. Sci. Data*, 11, 1411–1436, doi: 10.5194/essd-11-1411-2019, 2019.

Zheng, B., Ciais, P., Chevallier, F., Yang, H., Canadell, J. G., Chen, Y., van der Velde, I. R., Aben, I., Chuvieco, E., Davis, S. J., Deeter, M., Hong, C., Kong, Y., Li, H., Li, H., Lin, X., He, K., and Zhang, Q.: Record-high CO<sub>2</sub> emissions from boreal fires in 2021, *Science*, 379, 912-917, doi: 10.1126/science.ade0805, 2023.

Zhu, Q., Liu, J., Peng, C., Chen, H., Fang, X., Jiang, H., Yang, G., Zhu, D., Wang, W. and Zhou, X.: Modelling methane emissions from natural wetlands by development and application of the TRIPLEX-GHG model, *Geosci. Model Dev.*, 7(3), 981–999, doi:10.5194/gmd-7-981-2014, 2014.

Zhu, Q., Peng, C., Chen, H., Fang, X., Liu, J., Jiang, H., Yang, Y. and Yang, G.: Estimating global natural wetland methane emissions using process modelling: spatio-temporal patterns and contributions to atmospheric methane fluctuations, *Glob. Ecol. Biogeogr.*, 24, 959–972, 2015.

Zhu, Y., K.J. Purdy, Ö. Eyice, L. Shen, S.F. Harpenslager, G. Yvon-Durocher, A.J. Dumbrell, and M. Trimmer: Disproportionate increase in freshwater methane emissions induced by experimental warming, *Nature Climate Change*, 10(7): p. 685-690., 2020

Zhuang, Q., Melillo, J. M., Kicklighter, D. W., Prinn, R. G., McGuire, A. D., Steudler, P. A., Felzer, B. S. and Hu, S.: Methane fluxes between terrestrial ecosystems and the atmosphere at northern high latitudes during the past century: A retrospective analysis with a process-based biogeochemistry model, *Glob. Biogeochem Cycles*, 18(3), GB3010,



7407 [doi:10.1029/2004gb002239](https://doi.org/10.1029/2004gb002239), 2004.

7408 [Zhuang, Q., Chen, M., Xu, K., Tang, J., Saikawa, E., Lu, Y., Melillo, J. M., Prinn, R. G. and McGuire, A. D.: Response](#)

7409 [of global soil consumption of atmospheric methane to changes in atmospheric climate and nitrogen deposition, Glob.](#)

7410 [Biogeochem. Cycles, 27\(3\), 650–663, doi:10.1002/gbc.20057, 2013.](#)

7411 [Zhuang, Q., M. Guo, J.M. Melack, X. Lan, Z. Tan, Y. Oh, and L.R. Leung: Current and Future Global Lake Methane](#)

7412 [Emissions: A Process-Based Modeling Analysis. Journal of Geophysical Research: Biogeosciences, 128\(3\): p.](#)

7413 [e2022JG007137, 2023](#)

Table 1: **Bottom-up (BU)** models and inventories for anthropogenic and biomass burning used in this study. \*Due to its limited **sectoral** breakdown this dataset was not used in Table 3.

| B-U models and inventories | Contribution                                                  | Time period (resolution)                           | Gridded        | References                                                      |
|----------------------------|---------------------------------------------------------------|----------------------------------------------------|----------------|-----------------------------------------------------------------|
| CEDS (country based)       | Fossil fuels, Agriculture and waste, Biofuel                  | 1970-2019 (yearly)                                 | no             | Hoesly et al. (2018)                                            |
| CEDS (gridded)*            | Fossil fuels, Agriculture and waste, Biofuel                  | 1970-2020 (monthly)                                | 0.5x0.5°       | Hoesly et al. (2018)<br>O'Rourke et al. (2021)                  |
| EDGARv6                    | Fossil fuels, Agriculture and waste, Biofuel                  | 1990-2018^ (yearly, monthly for some sectors)      | 0.1x0.1°       | Oreggioni et al. (2021), Crippa et al. (2021)                   |
| EDGARv7                    | Fossil fuels, Agriculture and waste, Biofuel                  | 1990-2021 (yearly)                                 | 0.1x0.1°       | Crippa et al. (2023)                                            |
| IIASA GAINS v4.0           | Fossil fuels, Agriculture and waste, Biofuel                  | 1990-2020 (yearly)                                 | 0.5x0.5°       | Höglund-Isaksson et al. (2020)                                  |
| USEPA                      | Fossil fuels, Agriculture and waste, Biofuel, Biomass Burning | 1990-2030 (10-yr interval, interpolated to yearly) | no             | USEPA (2019)                                                    |
| FAO-CH4                    | Agriculture, Biomass Burning                                  | 1961-2020 (Yearly)                                 | no             | Federici et al. (2015); Tubiello et al. (2013); Tubiello (2019) |
| FINNv2.5                   | Biomass burning                                               | 2002-2020 (daily)                                  | 1km resolution | Wiedinmyer et al. (2023)                                        |
| GFASv1.3                   | Biomass burning                                               | 2003-2020 (daily)                                  | 0.1x0.1°       | Kaiser et al. (2012)                                            |
| GFEDv4.1s                  | Biomass burning                                               | 1997-2020 (monthly)                                | 0.25x0.25°     | Giglio et al. (2013); van der Werf et al. (2017)                |
| QFEDv2.5                   | Biomass burning                                               | 2000-2020 (daily)                                  | 0.1x0.1°       | Darmenov and da Silva (2015)                                    |

- Mis en forme : Anglais (G.B.)
- Supprimé: inventories
- Mis en forme : Forcer une largeur de colonne identique
- Supprimé: B-U
- Mis en forme : Anglais (G.B.)
- Mis en forme : Anglais (G.B.)
- Supprimé: sectorial
- Supprimé: ^Extended to 2017 for this study as described in Section 3.1.1.
- Tableau mis en forme
- Supprimé: 2015^
- Supprimé: Hoesly et al. (2018)\*
- Supprimé: Hoesly et al. (2018)\* ... [122]
- Supprimé: 2014
- Mis en forme : Français
- Supprimé: 2012
- Supprimé: Janssens-Maenhout et al. (2019)
- Supprimé: EDGARv4.2.3
- Mis en forme : Français
- Supprimé: 2015^
- Supprimé: Höglund-Isaksson (2012)
- Tableau mis en forme
- Supprimé: ECLIPSEv6
- Supprimé: (1990-2015 yearly, >2015 5-yr interval interpolated) [123]
- Supprimé: USEPA (2012)
- Supprimé: Federici et al. (2015); Tubiello et al. (2013); Tubiello (2019) [124]
- Supprimé: 2016^
- Supprimé: 2016
- Mis en forme : Français
- Supprimé: 2018
- Supprimé: FINNv1
- Supprimé: Wiedinmyer et al. (2011)
- Supprimé: 2016
- Supprimé: Kaiser et al. (2012)
- Supprimé: 2017
- Supprimé: Giglio et al. (2013)
- Mis en forme : Français
- Supprimé: 2017
- Supprimé: Darmenov and da Silva (2015)

Table 2: Biogeochemical models that computed wetland emissions used in this study. Model runs were performed with two climate inputs, CRU and GSWP3-W5E5. Models were run with prognostic (using their own calculation of wetland areas) and/or diagnostic (using WAD2M, (Zhang et al., 2021b)) wetland surface areas (see Sect 3.2.1).

| Model                     | Institution                              | Prognostic |            | Diagnostic |            | References                                   |
|---------------------------|------------------------------------------|------------|------------|------------|------------|----------------------------------------------|
|                           |                                          | CRU        | GSWP3-W5E5 | CRU        | GSWP3-W5E5 |                                              |
| CH4MOD <sub>wetland</sub> | Institute of Atmospheric Physics, CAS    | n          | n          | y          | y          | Li et al. (2010)                             |
| CLASSIC                   | Environment and Climate Change Canada    | y          | y*         | y          | y*         | Arora et al. (2018); Melton and Arora (2016) |
| DLEM                      | Boston College                           | y          | y          | y          | y          | Tian et al. (2015, 2023)                     |
| ELM-ECA                   | Lawrence Berkeley National Laboratory    | y          | y          | y          | y          | Riley et al. (2011)                          |
| ISAM                      | University of Illinois, Urbana-Champaign | y          | y          | y          | y          | Shu et al. (2020)<br>Xu et al. (2021)        |
| JSBACH                    | MPI                                      | y          | y          | y          | y          | Kleinen et al. (2020, 2021, 2023)            |
| JULES                     | UKMO                                     | y          | y          | y          | y          | Gedney et al. (2019)                         |
| LPI-GUESS                 | Lund University                          | n          | n          | y          | y          | McGuire et al. (2012)                        |
| LPI-MPI                   | MPI                                      | y          | y          | y          | y          | Kleinen et al. (2012)                        |
| LPI-WSL                   | NASA GSFC                                | y          | y          | y          | y          | Zhang et al. (2016)                          |
| LPX-Bern                  | University of Bern                       | y          | y          | y          | y          | Spahni et al. (2011), Stocker et al. (2014)  |
| ORCHIDEE                  | LSCE                                     | y          | y          | y          | y          | Ringeval et al. (2011)                       |

- Supprimé: Runs
- Supprimé: for the whole period 2000-2017. Models
- Supprimé: )
- Tableau mis en forme
- Mis en forme : Bordure : Haut: (Pas de bordure), Bas: (Pas de bordure), Gauche: (Pas de bordure), Droite: (Pas de bordure), Entre : (Pas de bordure)
- Supprimé: Arora et al. (2018); Melton and Arora (2016)
- Supprimé: CLASS-CTEM
- Cellules insérées
- Cellules insérées
- Tableau mis en forme
- Mis en forme : Anglais (G.B.)
- Supprimé: Auburn University
- Supprimé: n
- Supprimé: Tian et al. (2010, 2015)
- Supprimé: ... [125]
- Supprimé: Kleinen et al. (2019)
- Tableau mis en forme
- Supprimé: n
- Cellules insérées
- Cellules insérées
- Supprimé: Hayman et al. (2014)
- Supprimé:
- Supprimé: y
- Supprimé: McGuire et al. (2012)
- Mis en forme : Anglais (G.B.)
- Mis en forme : Anglais (G.B.)
- Supprimé:
- Mis en forme : Anglais (G.B.)
- Supprimé: n
- Mis en forme : Anglais (G.B.)
- Supprimé: Kleinen et al. (2012)
- Mis en forme : Anglais (G.B.)
- Mis en forme : Anglais (G.B.)
- Supprimé: Zhang et al. (2016)
- Supprimé: Spahni et al. (2011)
- Supprimé: Ringeval et al. (2011)

|                        |                                                      |   |              |   |   |                                                          |
|------------------------|------------------------------------------------------|---|--------------|---|---|----------------------------------------------------------|
| SDGVM                  | University of Birmingham/<br>University of Sheffield | y | y            | y | y | Beerling & Woodward (2001), Hopcroft et al. (2011, 2020) |
| TEM-MDM                | Purdue University                                    | n | <del>y</del> | y | y | Zhuang et al. (2004)                                     |
| TRIPLEX <sub>GHG</sub> | UQAM                                                 | n | <del>y</del> | y | y | Zhu et al. (2014, 2015)                                  |
| VISIT                  | NIES                                                 | y | y            | y | y | Ito and Inatomi (2012)                                   |

\*CLASSIC uses GSWP3-W5E version 2 that covers the time period till 2016. All other models use GSWP-W5E5 version 3.

- Supprimé: y
- Tableau mis en forme
- Cellules insérées
- Supprimé: Zhuang et al. (2004)
- Cellules insérées
- Supprimé: \_
- Supprimé: y
- Supprimé: Zhu et al. (2014, 2015)
- Supprimé: Ito and Inatomi (2012)

Table 3: Global methane emissions by source type in Tg CH<sub>4</sub> yr<sup>-1</sup> from Saunois et al. (2020) (left column pair) and from this work using bottom-up and top-down approaches. Because top-down models cannot fully separate individual processes, only five categories of emissions are provided (see text). Uncertainties are reported as [min-max] range of reported studies. The mean, minimum and maximum values are calculated while discarding outliers, for each category of source and sink. As a result, discrepancies may occur when comparing the sum of categories and their corresponding total due to differences in outlier detections. Differences of 1 Tg CH<sub>4</sub> yr<sup>-1</sup> in the totals can also occur due to rounding errors. Compared to Saunois et al. (2020), emissions are split between “direct anthropogenic” emissions and “natural and indirect anthropogenic” sources. We also propose an estimate of the double-counting between bottom-up wetland and inland freshwater ecosystems emissions.

| Period of time                                      | Saunois et al. (2020) |                      | This work            |                      |                      |                      |                      |                      |
|-----------------------------------------------------|-----------------------|----------------------|----------------------|----------------------|----------------------|----------------------|----------------------|----------------------|
|                                                     | 2000-2009             |                      | 2000-2009            |                      | 2010-2019            |                      | 2020                 |                      |
|                                                     | bottom-up             | top-down             | bottom-up            | top-down             | bottom-up            | top-down             | bottom-up            | top-down             |
| <b>NATURAL &amp; indirect anthropogenic SOURCES</b> |                       |                      |                      |                      |                      |                      |                      |                      |
| <b>Combined wetlands and inland freshwaters</b>     | <b>306 [229-391]</b>  | <b>180 [153-196]</b> | <b>242 [156-355]</b> | <b>158 [145-172]</b> | <b>248 [159-369]</b> | <b>165 [145-214]</b> | <b>251 [171-364]</b> | <b>175 [151-229]</b> |
| Wetlands                                            | 147 [102-179]         | 180 [153-196]        | 153 [116-189]        | 158 [145-172]        | 159 [119-203]        | 165 [145-214]        | 161 [131-198]        | 175 [151-229]        |
| Inland freshwaters                                  | 159 [117-212]         |                      | 112 [49-202]         |                      | 112 [49-202]         |                      | 112 [49-202]         |                      |
| Double counting <sup>b</sup>                        | NA                    |                      | -23 [-9 - -36]       |                      | -23 [-9 - -36]       |                      | -23 [-9 - -36]       |                      |
| Other natural sources                               | 63 [26-94]            | 35 [21-47]           | 63 [24-93]           | 44 [40-46]           | 63 [24-93]           | 43 [40-46]           | 63 [24-93]           | 44 [40-47]           |
| Land sources                                        | 50 [17-72]            |                      | 51 [18-73]           |                      |                      |                      |                      |                      |
| Geological (onshore)                                | 38 [13-53]            |                      | 38 [13-53]           |                      |                      |                      |                      |                      |
| Wild animals                                        | 2 [1-3]               |                      | 2 [1-3]              |                      |                      |                      |                      |                      |
| Termites                                            | 9 [3-15]              |                      | 10 [4-16]            |                      |                      |                      |                      |                      |
| Wildfires                                           | (**)                  |                      | (**)                 |                      |                      |                      |                      |                      |
| Permafrost soils (direct)                           | 1 [0-1]               |                      | 1 [0-1]              |                      |                      |                      |                      |                      |
| Vegetation                                          | (*)                   |                      | (*)                  |                      |                      |                      |                      |                      |
| Oceanic sources                                     | 13 [9-22]             |                      | 12 [6-20]            |                      |                      |                      |                      |                      |
| Biogenic                                            | 6 [4-10]              |                      | 5 [3-10]             |                      |                      |                      |                      |                      |
| Geological (offshore)                               | 7 [5-12]              |                      | 7 [5-12]             |                      |                      |                      |                      |                      |
| <b>TOTAL NATURAL &amp; INDIRECT SOURCES</b>         | <b>369 [245-485]</b>  | <b>215 [176-243]</b> | <b>305 [180-448]</b> | <b>204 [189-223]</b> | <b>311 [183-462]</b> | <b>206 [188-225]</b> | <b>314 [195-457]</b> | <b>216 [193-241]</b> |
| <b>DIRECT ANTHROPOGENIC SOURCES</b>                 |                       |                      |                      |                      |                      |                      |                      |                      |
| Agriculture and waste                               | 192 [178-206]         | 202 [198-219]        | 194 [181-208]        | 210 [197-223]        | 211 [195-231]        | 228 [213-242]        | 211 [204-216]        | 245 [232-259]        |
| Agriculture                                         | 132 [NA]              |                      | 134 [125-142]        |                      | 143 [132-155]        |                      | 147 [143-149]        |                      |
| Enteric ferm. & manure                              | 104 [93-109]          |                      | 104 [100-110]        |                      | 112 [107-118]        |                      | 117 [114-124]        |                      |
| Rice cultivation                                    | 28 [23-34]            |                      | 30 [24-34]           |                      | 32 [25-37]           |                      | 32 [29-37]           |                      |
| Landfills and waste                                 | 60 [55-63]            |                      | 61 [52-71]           |                      | 69 [56-80]           |                      | 71 [60-84]           |                      |
| Fossil fuels                                        | 110 [94-129]          | 101 [71-151]         | 105 [97-123]         | 105 [88-115]         | 120 [117-125]        | 115 [100-124]        | 128 [120-133]        | 122 [101-133]        |
| Coal mining                                         | 32 [24-42]            |                      | (****)               |                      | (****)               |                      | (****)               |                      |

- Supprimé: 2016...020) (left column pair) and for...from this [126]
- Supprimé: 2016
- Tableau mis en forme ... [127]
- Supprimé: 2008-2017
- Supprimé: 2017
- Mis en forme ... [128]
- Tableau mis en forme ... [129]
- Déplacé (insertion) [5]
- Supprimé: 183 [131]
- Supprimé: 147 [137]
- Supprimé: 181 [145]
- Supprimé: 145 [148]
- Supprimé: 194 [151]
- Supprimé: 166 [134]
- Déplacé (insertion) [6]
- Mis en forme ... [135]
- Mis en forme ... [136]
- Mis en forme ... [141]
- Déplacé vers le haut [5]: 180 [139]
- Mis en forme ... [139]
- Mis en forme ... [140]
- Supprimé: 149 [142]
- Mis en forme ... [146]
- Mis en forme ... [147]
- Mis en forme ... [152]
- Mis en forme ... [153]
- Mis en forme ... [133]
- Mis en forme ... [130]
- Mis en forme ... [132]
- Mis en forme ... [143]
- Mis en forme ... [149]
- Mis en forme ... [138]
- Mis en forme ... [144]
- Mis en forme ... [150]
- Mis en forme ... [154]
- Supprimé: 199 [155]
- Supprimé: 68 [159]
- Supprimé: 222 [161]
- Supprimé: 35 [163]
- Supprimé: 222 [165]
- Supprimé: 37 [167]
- Supprimé: 222 [169]
- Supprimé: 39 [157]
- Mis en forme ... [157]
- Mis en forme ... [156]
- Mis en forme ... [158]
- Supprimé: 130
- Mis en forme ... [160]
- Mis en forme ... [162]
- Mis en forme ... [164]
- Mis en forme ... [166]
- Mis en forme ... [168]
- Mis en forme ... [170]
- Supprimé: Other land sources ... [171]

|                                                          |                                                                        |                                                   |                                                                                            |                                                   |                                                                                            |                                                   |                                                                                            |                                                   |
|----------------------------------------------------------|------------------------------------------------------------------------|---------------------------------------------------|--------------------------------------------------------------------------------------------|---------------------------------------------------|--------------------------------------------------------------------------------------------|---------------------------------------------------|--------------------------------------------------------------------------------------------|---------------------------------------------------|
| Oil & Gas Industry Transport                             | <del>23</del> [60-85]<br><del>2</del> [0-6]<br><del>4</del> [1-11]     |                                                   | <del>30</del> [26-32]<br><del>65</del> [63-71]<br><del>4</del> [1-8]<br><del>3</del> [1-8] |                                                   | <del>40</del> [37-44]<br><del>67</del> [57-74]<br><del>5</del> [1-9]<br><del>2</del> [1-3] |                                                   | <del>41</del> [38-43]<br><del>74</del> [67-80]<br><del>5</del> [1-8]<br><del>2</del> [1-3] |                                                   |
| Biomass & biof. burn.                                    | <del>31</del> [26-36]<br><del>19</del> [15-22]<br><del>12</del> [9-14] | <del>29</del> [23-35]<br><br><br>                 | <del>30</del> [22-44]<br><br><br>                                                          | <del>26</del> [22-29]<br><br><br>                 | <del>28</del> [21-39]<br><br><br>                                                          | <del>27</del> [26-27]<br><br><br>                 | <del>27</del> [20-41]<br><br><br>                                                          | <del>26</del> [22-27]<br><br><br>                 |
| Biomass burning<br>Biofuel burning                       | <br><br><br>                                                           | <br><br><br>                                      | <br><br><br>                                                                               | <br><br><br>                                      | <br><br><br>                                                                               | <br><br><br>                                      | <br><br><br>                                                                               | <br><br><br>                                      |
| TOTAL DIRECT ANTHROGENIC SOURCES                         | <del>334</del> <sup>d</sup> [321-358]                                  | <del>332</del> [312-347]                          | <del>333</del> <sup>d</sup> [305-365]                                                      | <del>341</del> [319-355]                          | <del>358</del> <sup>d</sup> [329-387]                                                      | <del>369</del> [350-391]                          | <del>372</del> <sup>d</sup> [345-409]                                                      | <del>392</del> [368-409]                          |
| SINKS                                                    |                                                                        |                                                   |                                                                                            |                                                   |                                                                                            |                                                   |                                                                                            |                                                   |
| Total chemical loss                                      | <del>595</del> [489-749]<br>553 [476-677]                              | <del>505</del> [459-516]<br><br>                  | <del>585</del> [481-716]<br>546 [446-663]                                                  | <del>504</del> <sup>e</sup> [496-511]<br><br>     | <del>602</del> [496-747]<br>563 [462-663]                                                  | <del>521</del> <sup>e</sup> [485-532]<br><br>     | <del>602</del> [496-747]<br>563 [462-663]                                                  | <del>538</del> <sup>e</sup> [503-554]<br><br>     |
| Tropospheric OH<br>Stratospheric loss<br>Tropospheric Cl | <br><br><br>                                                           | <br><br><br>                                      | <br><br><br>                                                                               | <br><br><br>                                      | <br><br><br>                                                                               | <br><br><br>                                      | <br><br><br>                                                                               | <br><br><br>                                      |
| Soil uptake                                              | <del>30</del> [11-49]<br><del>625</del> <sup>d</sup> [500-798]         | <del>34</del> [27-41]<br><del>540</del> [486-556] | <del>30</del> [11-49]<br><del>615</del> [492-765]                                          | <del>34</del> [24-34]<br><del>538</del> [530-545] | <del>31</del> [11-49]<br><del>633</del> [507-796]                                          | <del>35</del> [35-35]<br><del>554</del> [520-567] | <del>31</del> [11-49]<br><del>633</del> [507-796]                                          | <del>36</del> [35-36]<br><del>575</del> [566-589] |
| TOTAL SINKS                                              |                                                                        |                                                   |                                                                                            |                                                   |                                                                                            |                                                   |                                                                                            |                                                   |
| SOURCES – SINKS IMBALANCE                                |                                                                        |                                                   |                                                                                            |                                                   |                                                                                            |                                                   |                                                                                            |                                                   |
| TOTAL SOURCES                                            | <del>703</del> [566-842]                                               | <del>547</del> <sup>e</sup> [524-560]             | <del>638</del> [485-813]                                                                   | <del>543</del> [526-558]                          | <del>669</del> [512-849]                                                                   | <del>575</del> [553-586]                          | <del>685</del> [540-865]                                                                   | <del>608</del> [581-627]                          |
| TOTAL SINKS                                              | <del>625</del> [500-798]                                               | <del>540</del> [486-556]                          | <del>615</del> [492-765]                                                                   | <del>538</del> [530-545]                          | <del>633</del> [507-796]                                                                   | <del>554</del> [550-567]                          | <del>633</del> [507-796]                                                                   | <del>575</del> [566-589]                          |
| IMBALANCE                                                | <del>78</del>                                                          | <del>3</del> [-10-38]                             | <del>23</del>                                                                              | <del>5</del> [-4-13] <sup>e</sup>                 | <del>36</del>                                                                              | <del>21</del> [19-33] <sup>e</sup>                | <del>52</del>                                                                              | <del>32</del> [15-38] <sup>e</sup>                |
| ATMOSPHERIC GROWTH                                       | <del>4</del>                                                           | <del>5.8</del> [4.9-6.6] <sup>f</sup>             | <del>6.1</del> [5.2-6.9] <sup>f</sup>                                                      | <del>6.1</del> [5.2-6.9] <sup>f</sup>             | <del>20.9</del> [20.1-21.7] <sup>f</sup>                                                   | <del>20.9</del> [20.1-21.7] <sup>f</sup>          | <del>20.9</del> [20.1-21.7] <sup>f</sup>                                                   | <del>41.8</del> [40.7-42.9] <sup>f</sup>          |

(\*\*) uncertain but likely small for upland forest and aerobic emissions, potentially large for forested wetland, but likely included elsewhere

(\*\*) We stop reporting this value to avoid potential double counting with satellite-based products of biomass burning (see Sect. 3.1.5)

(\*\*\*) Here the numbers are from prognostic runs. To ensure a fair comparison with previous budgets (Saunio et al., 2020), the numbers are 163 [117-195] for 2000-2009 from diagnostic runs with CRU/CRU-JRA-55 climate inputs (see Sect. 3.2.1).

(\*\*\*\*) Up to 8 Tg of additional emissions could account for ultra emitters (Lauvaux et al., 2022), as in Tibrewal et al. (2024), that are fully or partly missed in regular anthropogenic inventories

a: Freshwater includes lakes, ponds, reservoirs, streams and rivers, part of it is due to anthropogenic disturbances estimated in Sect 3.2.2

b: The double counting estimate is discussed in Sect. 3.2.2

c: includes flux from hydrates considered at 0 for this study, includes estuaries

d: Total anthropogenic emissions are based on estimates of full anthropogenic inventory and not on the sum of “Agriculture and Waste”, “Fossil fuels” and “Biofuel and biomass burning” categories (see Sect. 3.1.2)

e: Some inversions did not provide the chemical sink. These values are derived from a subset of the inversion ensemble.

f: Atmospheric growth rates are given in the same unit Tg CH<sub>4</sub> yr<sup>-1</sup>, based on the conversion factor of 2.75 Tg CH<sub>4</sub> ppb<sup>-1</sup> given by Prather et al. (2012) and the atmospheric growth rates provided in the text in ppb yr<sup>-1</sup>.

|                                             |           |
|---------------------------------------------|-----------|
| Supprimé: 76 [64...3 [60-85] <sup>d</sup>   | ... [243] |
| Déplacé vers le haut [11]: 110 <sup>e</sup> |           |
| Supprimé: [24-42]                           |           |
| Mis en forme                                | ... [244] |
| Mis en forme                                | ... [250] |
| Supprimé: <sup>d</sup>                      | ... [245] |
| Supprimé: 73 [60-85] <sup>f</sup>           | ... [251] |
| Supprimé: 11                                |           |
| Mis en forme                                | ... [249] |
| Supprimé: 13                                |           |
| Mis en forme                                | ... [248] |
| Mis en forme                                | ... [246] |
| Mis en forme                                | ... [247] |
| Supprimé: 12                                |           |
| Mis en forme                                | ... [255] |
| Mis en forme                                | ... [253] |
| Mis en forme                                | ... [252] |
| Mis en forme                                | ... [254] |
| Supprimé: 30                                |           |
| Mis en forme                                | ... [256] |
| Supprimé: 34                                |           |
| Mis en forme                                | ... [258] |
| Supprimé: [16-53]                           |           |
| Supprimé: 31 [26-46] <sup>f</sup>           | ... [260] |
| Mis en forme                                | ... [262] |
| Supprimé: [23-35]                           |           |
| Supprimé: 30 [26-40] <sup>f</sup>           | ... [265] |
| Supprimé: 30 [22-36]                        |           |
| Supprimé: 29 [24-38] <sup>f</sup>           | ... [270] |
| Supprimé: 28 [25-32]                        |           |
| Mis en forme                                | ... [263] |
| Mis en forme                                | ... [264] |
| Mis en forme                                | ... [268] |
| Mis en forme                                | ... [269] |
| Mis en forme                                | ... [272] |
| Mis en forme                                | ... [273] |
| Supprimé: 18...9 [15-20]                    | ... [257] |
| Mis en forme                                | ... [261] |
| Supprimé: 15-32                             |           |
| Supprimé: 14-26] <sup>f</sup>               | ... [266] |
| Supprimé: [                                 |           |
| Mis en forme                                | ... [259] |
| Supprimé: 12 [9                             |           |
| Mis en forme                                | ... [267] |
| Mis en forme                                | ... [271] |
| Supprimé: 338 <sup>f</sup>                  | ... [274] |
| Supprimé: 319 <sup>f</sup>                  | ... [277] |
| Supprimé: 334 <sup>f</sup>                  | ... [279] |
| Supprimé: 332 <sup>f</sup>                  | ... [281] |
| Supprimé: 366 <sup>f</sup>                  | ... [282] |
| Supprimé: 359 <sup>f</sup>                  | ... [284] |
| Supprimé: 380 <sup>f</sup>                  | ... [285] |
| Supprimé: 364 <sup>f</sup>                  | ... [287] |
| Mis en forme                                | ... [275] |

Table 4: Top-down studies used [here](#) with their contribution to the decadal and yearly estimates noted. For decadal means, top down studies [must](#) provide at least 8 years of data over the decade to contribute to the estimate. [Details on each inverse system and inversions are provided in Table S8 to S11 in the Supplementary Material.](#)

| Model                                 | Institution  | Observation used                                          | Time period | Number of inversions | 2000-2009 | 2010-2019 | 2020 | References                                                   |
|---------------------------------------|--------------|-----------------------------------------------------------|-------------|----------------------|-----------|-----------|------|--------------------------------------------------------------|
| Carbon Tracker-Europe CH <sub>4</sub> | FMI          | Surface stations                                          | 2000-2020   | 4                    | y         | y         | y    | <a href="#">Tsuruta et al. (2017)</a>                        |
| LMDz-CIF                              | LSCE/CEA     | Surface stations                                          | 2000-2020   | 4                    | y         | y         | y    | <a href="#">Thanwerdas et al. (2022a)</a>                    |
| LMDz-PYVAR                            | LSCE/CEA/THE | GOSAT Leicester                                           | 2010-2020   | 4                    | n         | y         | y    | <a href="#">Zheng et al. (2018a, 2018b, 2019)</a>            |
| MIROC4-ACTM                           | JAMSTEC      | Surface stations                                          | 2000-2020   | 5                    | y         | y         | y    | <a href="#">Patra et al. (2018); Chandra et al. (2021)</a>   |
| NISMON-CH <sub>4</sub>                | NIES/MRI     | Surface stations                                          | 2000-2020   | 2                    | y         | y         | y    | <a href="#">Niwa et al. (2022)</a>                           |
| NIES-TM-FLEXPART (NTEVAR)             | NIES         | Surface stations                                          | 2000-2020   | 2                    | y         | y         | y    | <a href="#">Maksyutov et al. (2020); Wang et al. (2019a)</a> |
| NIES-TM-FLEXPART (NTEVAR)             | NIES         | GOSAT NIES L2                                             | 2010-2020   | 1                    | n         | y         | y    | <a href="#">Maksyutov et al. (2020); Wang et al. (2019a)</a> |
| TM5-CAMS                              | TNO/VU       | Surface stations                                          | 2000-2020   | 1                    | y         | y         | y    | <a href="#">Segers et al. (2022)</a>                         |
| TM5-CAMS                              | TNO/VU       | GOSAT ESA/CCI v2.3.8 (combined with surface observations) | 2010-2020   | 1                    | n         | y         | y    | <a href="#">Segers et al. (2022)</a>                         |
| Total number of runs                  |              |                                                           |             | 24                   | 18        | 24        | 24   |                                                              |

Supprimé: in our new analysis,...ere with their contribution 599

Mis en forme ... [360]

Supprimé: 2008- 361

Supprimé: 2017

Supprimé: Tsuruta et al. (2017)

Supprimé: 2017

Supprimé: 1

Mis en forme ... [362]

Supprimé: Carbon Tracker-Europe CH<sub>4</sub> ... [363]

Supprimé: Yin et al. (2015)

Mis en forme ... [364]

Supprimé: PYVAR

Supprimé: 2010-2016

Supprimé: 2

Mis en forme ... [367]

Supprimé: n

Mis en forme ... [368]

Supprimé: n

Mis en forme ... [365]

Mis en forme ... [366]

Mis en forme ... [369]

Mis en forme ... [370]

Supprimé: LMDz-PYVAR ... [371]

Mis en forme ... [372]

Supprimé: 2

Supprimé: Zheng et al. (2018b, 2018a)

Mis en forme ... [376]

Supprimé: 2017

Mis en forme ... [375]

Mis en forme ... [373]

Supprimé: v7.2

Mis en forme ... [374]

Mis en forme ... [377]

Supprimé: 1

Mis en forme ... [379]

Supprimé: n

Mis en forme ... [380]

Supprimé: Patra et al. (2016, 2018)

Mis en forme ... [381]

Supprimé: 2016

Mis en forme ... [378]

Supprimé: NICAM-TM

Mis en forme ... [383]

Supprimé: 1

Mis en forme ... [385]

Supprimé: Niwa et al. (2017a, 2017b)

Mis en forme ... [386]

Mis en forme ... [382]

Supprimé: 2017

Mis en forme ... [384]

Mis en forme ... [387]

Supprimé: Maksyutov et al. (2020); Wang et al. (2019a)

Supprimé: 1

Mis en forme ... [390]



Table 5: Global and latitudinal total methane emissions in Tg CH<sub>4</sub> yr<sup>-1</sup>, as decadal means (2000-2009 and 2010-2019) and for the year 2020 from this work using bottom-up and top-down approaches. Global and latitudinal emissions for 2000-2009 are also compared with Saunois et al. (2016, 2020) for top-down and bottom-up approaches when available. Uncertainties are reported as [min-max] range. The mean, minimum and maximum values are calculated while discarding outliers, for each category of source and sink. As a result, discrepancies may occur when comparing the sum of categories and their corresponding total due to differences in outlier detections. Differences of 1 Tg CH<sub>4</sub> yr<sup>-1</sup> in the totals can also occur due to rounding errors. For the latitudinal breakdown, bottom-up anthropogenic estimates are based only on the gridded products (see Table 1). As a result, the total from the latitudinal breakdown (line called “This work (gridded BU products only)”) is slightly different from the values provided in Table 3 and recalled in the line “This work (all BU products)”.

| Period                               | 2000-2009     |               | 2010-2019     |               | 2020          |               |
|--------------------------------------|---------------|---------------|---------------|---------------|---------------|---------------|
| Approach                             | Bottom-up     | Top-down      | Bottom-up     | Top-down      | Bottom-up     | Top-down      |
| Global                               |               |               |               |               |               |               |
| This work (all BU products)          | 638 [485-813] | 543 [526-558] | 669 [512-849] | 575 [553-586] | 685 [540-865] | 608 [581-627] |
| This work (gridded BU products only) | 642 [501-809] |               | 676 [526-845] |               | 691 [565-862] |               |
| S2020                                | 703 [566-842] | 547 [524-560] |               |               |               |               |
| S2016                                | 719 [583-861] | 552 [535-566] | =             | =             | =             | =             |
| 90°S-30°N                            |               |               |               |               |               |               |
| This work                            | 367 [254-487] | 337 [311-361] | 388 [275-503] | 364 [337-390] | 395 [292-521] | 386 [353-425] |
| S2020                                | 408 [322-532] | 346 [320-379] |               |               |               |               |
| S2016                                | =             | 356 [334-381] | =             | =             | =             | =             |
| 30°N-60°N                            |               |               |               |               |               |               |

|                                                             |           |
|-------------------------------------------------------------|-----------|
| Supprimé: 2008-2017                                         |           |
| Mis en forme                                                | ... [418] |
| Supprimé: 2017, for                                         |           |
| Mis en forme                                                | ... [419] |
| Supprimé: ) and Kirschke et al. (2013... 2020) for top-down |           |
| Mis en forme                                                | ... [422] |
| Supprimé: 2008-2017                                         |           |
| Mis en forme                                                | ... [421] |
| Mis en forme                                                | ... [423] |
| Supprimé: 2017                                              |           |
| Mis en forme                                                | ... [424] |
| Mis en forme                                                | ... [425] |
| Mis en forme                                                | ... [426] |
| Mis en forme                                                | ... [427] |
| Cellules supprimées                                         | ... [433] |
| Mis en forme                                                | ... [429] |
| Cellules supprimées                                         | ... [430] |
| Cellules supprimées                                         | ... [431] |
| Cellules supprimées                                         | ... [432] |
| Cellules supprimées                                         | ... [434] |
| Cellules supprimées                                         | ... [435] |
| Mis en forme                                                | ... [428] |
| Supprimé: This work                                         | ... [436] |
| Mis en forme                                                | ... [437] |
| Mis en forme                                                | ... [438] |
| Mis en forme                                                | ... [439] |
| Supprimé:                                                   |           |
| Mis en forme                                                | ... [440] |
| Supprimé:                                                   | ... [441] |
| Supprimé: 737                                               | ... [447] |
| Mis en forme                                                | ... [448] |
| Mis en forme                                                | ... [449] |
| Supprimé: 576                                               | ... [450] |
| Mis en forme                                                | ... [452] |
| Supprimé: 747                                               | ... [453] |
| Mis en forme                                                | ... [454] |
| Supprimé: 596                                               | ... [455] |
| Mis en forme                                                | ... [442] |
| Mis en forme                                                | ... [451] |
| Mis en forme                                                | ... [443] |
| Mis en forme                                                | ... [456] |
| Supprimé:                                                   |           |
| Mis en forme                                                | ... [444] |
| Supprimé:                                                   | ... [445] |
| Mis en forme                                                | ... [446] |
| Mis en forme                                                | ... [457] |
| Mis en forme                                                | ... [458] |
| Cellules supprimées                                         | ... [459] |
| Cellules supprimées                                         | ... [460] |
| Cellules supprimées                                         | ... [461] |
| Cellules supprimées                                         | ... [462] |
| Cellules supprimées                                         | ... [463] |
| Cellules supprimées                                         | ... [464] |
| Supprimé: This work                                         | ... [465] |

| Period                      | 2000-2009     |               | 2010-2019     |               | 2020          |               |
|-----------------------------|---------------|---------------|---------------|---------------|---------------|---------------|
| Approach                    | Bottom-up     | Top-down      | Bottom-up     | Top-down      | Bottom-up     | Top-down      |
|                             | Global        |               |               |               |               |               |
| This work (all BU products) | 638 [485-813] | 543 [526-558] | 669 [512-849] | 575 [553-586] | 685 [540-865] | 608 [581-627] |
| This work                   | 234 [169-335] | 182 [162-197] | 250 [184-345] | 187 [160-204] | 256 [186-356] | 197 [170-215] |
| S2020                       | 252 [202-342] | 178 [159-199] |               |               |               |               |
| S2016                       | =             | 176 [159-195] | =             | =             | =             | =             |
|                             | 60°N-90°N     |               |               |               |               |               |
| This work                   | 42 [22-79]    | 26 [22-33]    | 38 [17-73]    | 24 [18-29]    | 39 [17-74]    | 25 [20-32]    |
| S2020                       | 42 [28-70]    | 23 [17-32]    | =             | =             | =             | =             |
| S2016                       | =             | 20 [15-25]    | =             | =             | =             | =             |

|                               |
|-------------------------------|
| Supprimé: 2008-2017           |
| Mis en forme ... [493]        |
| Supprimé: 2017                |
| Mis en forme ... [494]        |
| Mis en forme ... [495]        |
| Mis en forme ... [496]        |
| Mis en forme ... [497]        |
| Mis en forme ... [498]        |
| Mis en forme ... [499]        |
| Mis en forme ... [500]        |
| Cellules supprimées ... [503] |
| Mis en forme ... [501]        |
| Cellules supprimées ... [502] |
| Cellules supprimées ... [504] |
| Cellules supprimées ... [505] |
| Cellules supprimées ... [506] |
| Cellules supprimées ... [507] |
| Supprimé: This work           |
| Supprimé: 186                 |
| Mis en forme ... [522]        |
| Supprimé: 272                 |
| Supprimé: 188                 |
| Mis en forme ... [526]        |
| Mis en forme ... [509]        |
| Mis en forme ... [510]        |
| Mis en forme ... [511]        |
| Supprimé:                     |
| Mis en forme ... [512]        |
| Supprimé:                     |
| Mis en forme ... [514]        |
| Mis en forme ... [520]        |
| Mis en forme ... [515]        |
| Supprimé: 267                 |
| Mis en forme ... [524]        |
| Supprimé:                     |
| Mis en forme ... [516]        |
| Supprimé:                     |
| Mis en forme ... [518]        |
| Mis en forme ... [527]        |
| Mis en forme ... [528]        |
| Supprimé:                     |
| Mis en forme ... [529]        |
| Cellules supprimées ... [530] |
| Cellules supprimées ... [531] |
| Cellules supprimées ... [532] |
| Cellules supprimées ... [533] |
| Cellules supprimées ... [534] |
| Cellules supprimées ... [535] |
| Mis en forme ... [536]        |
| Mis en forme ... [537]        |
| Mis en forme ... [540]        |
| Mis en forme ... [541]        |
| Supprimé:                     |
| Mis en forme ... [543]        |

Table 6: Latitudinal methane emissions in Tg CH<sub>4</sub> yr<sup>-1</sup> for the last decade **2010-2019**, based on top-down and bottom-up approaches. Uncertainties are reported as [min-max] range of reported studies. **The mean, minimum, and maximum values are calculated while discarding outliers, for each category of source and sink. As a result, discrepancies may occur when comparing the sum of categories and their corresponding total due to differences in outlier detections.** Differences of 1 Tg CH<sub>4</sub> yr<sup>-1</sup> in the totals can **also** occur due to rounding errors. For bottom-up approaches, **natural and indirect anthropogenic sources are estimated based on available gridded data sets (see text Sect 5.2). As some emissions are missing gridded products (wild animals, permafrost, and hydrates), discrepancies may occur in terms of totals proposed in Table 3. Bottom-up direct anthropogenic estimates are based only on the gridded products (see Table 1).**

| Latitudinal band                                  | 90°S- 30°N           |                      | 30°N-60°N            |                      | 60°-90°N         |                    |
|---------------------------------------------------|----------------------|----------------------|----------------------|----------------------|------------------|--------------------|
| Approach                                          | Bottom-up            | Top-Down             | Bottom-up            | Top-Down             | Bottom-up        | Top-Down           |
| <b>Natural and indirect anthropogenic Sources</b> | <b>178</b> [95-276]  | <b>148</b> [133-164] | <b>100</b> [43-188]  | <b>42</b> [36-50]    | <b>28</b> [9-53] | <b>14</b> [10-24]  |
| <b>Combined wetland and Inland freshwaters</b>    | <b>151</b> [85-234]  | <b>128</b> [112-155] | <b>73</b> [32-147]   | <b>27</b> [20-42]    | <b>24</b> [9-53] | <b>9</b> [7-17]    |
| <b>Other natural</b>                              | <b>27</b> [11-42]    | <b>22</b> [20-29]    | <b>27</b> [10-41]    | <b>19</b> [16-22]    | <b>4</b> [2-6]   | <b>3</b> [1-5]     |
| <b>Anthropogenic direct sources</b>               | <b>210</b> [180-227] | <b>215</b> [191-238] | <b>151</b> [142-157] | <b>144</b> [121-162] | <b>10</b> [6-14] | <b>10</b> [6-16]   |
| <b>Agriculture &amp; Waste</b>                    | <b>140</b> [121-150] | <b>150</b> [135-168] | <b>81</b> [77-84]    | <b>77</b> [56-88]    | <b>1</b> [1-2]   | <b>2</b> [2-2]     |
| <b>Fossil Fuels</b>                               | <b>52</b> [44-65]    | <b>46</b> [36-62]    | <b>65</b> [61-71]    | <b>61</b> [50-69]    | <b>7</b> [4-10]  | <b>7</b> [3-13]    |
| <b>Biomass &amp; biofuel burning</b>              | <b>22</b> [18-30]    | <b>19</b> [16-24]    | <b>7</b> [4-10]      | <b>6</b> [2-7]       | <b>1</b> [0-1]   | <b>1</b> [1-2]     |
| <b>Sum of sources</b>                             | <b>388</b> [275-503] | <b>364</b> [337-390] | <b>250</b> [184-345] | <b>187</b> [160-204] | <b>38</b> [7-73] | <b>24</b> [18- 29] |

|                                                              |
|--------------------------------------------------------------|
| Supprimé: 2008-2017                                          |
| Supprimé: other ...atural and indirect anthropogenic sources |
| Supprimé: from EDGARv4.3.2 and GAINS.                        |
| Mis en forme ... [558]                                       |
| Tableau mis en forme ... [559]                               |
| Mis en forme ... [560]                                       |
| Mis en forme ... [561]                                       |
| Supprimé: [29-54]                                            |
| Mis en forme ... [565]                                       |
| Supprimé: 31 [18- 55]                                        |
| Supprimé: 16 [11-20]                                         |
| Supprimé: 228 [155340]                                       |
| Mis en forme ... [562]                                       |
| Supprimé: 160 [130-189]                                      |
| Mis en forme ... [563]                                       |
| Supprimé: 115 [70- 192]                                      |
| Mis en forme ... [564]                                       |
| Mis en forme ... [566]                                       |
| Mis en forme ... [567]                                       |
| Mis en forme ... [568]                                       |
| Supprimé: Natural Wetland                                    |
| Supprimé: 25 [10-43]                                         |
| Supprimé: 33 [24-48]                                         |
| Supprimé: 13                                                 |
| Supprimé: 116 [71-146]                                       |
| Mis en forme ... [570]                                       |
| Supprimé: 135 [116]                                          |
| Mis en forme ... [571]                                       |
| Supprimé: [2-18]                                             |
| Mis en forme ... [575]                                       |
| Mis en forme ... [576]                                       |
| Supprimé: 16                                                 |
| Mis en forme ... [572]                                       |
| Mis en forme ... [573]                                       |
| Mis en forme ... [574]                                       |
| Mis en forme ... [577]                                       |
| Mis en forme ... [569]                                       |
| Mis en forme ... [578]                                       |
| Déplacé vers le haut [10]: 112                               |
| Mis en forme ... [579]                                       |
| Supprimé: [84-194]                                           |
| Mis en forme ... [580]                                       |
| Supprimé: 25 [14-36]                                         |
| Mis en forme ... [581]                                       |
| Supprimé: 90 [60-149]                                        |
| Mis en forme ... [582]                                       |
| Supprimé: 9 [4-14]                                           |
| Mis en forme ... [583]                                       |
| Supprimé: 22 [16-37]                                         |
| Mis en forme ... [584]                                       |
| Supprimé: 2-4                                                |
| Mis en forme ... [585]                                       |
| Mis en forme ... [586]                                       |
| Supprimé: 202 [183-217]                                      |

**Table 7: Regional methane emissions (regions ranked by continent) in Tg CH<sub>4</sub> yr<sup>-1</sup> for the last decade 2010-2019, based on top-down and bottom-up approaches. Uncertainties are reported as [min-max] range of reported studies. Differences of 1 Tg CH<sub>4</sub> yr<sup>-1</sup> in the totals can occur due to rounding errors. For bottom-up approaches, natural and indirect anthropogenic sources are estimated based on available gridded data sets (see text Sect 5.2). As some emissions are missing gridded products (wild animals, permafrost, and hydrates), discrepancies may occur in terms of totals proposed in Table 3. Bottom-up direct anthropogenic estimates are based on all products (gridded and per country).**

| Region                  | Total emissions |            | Natural and indirect anthropogenic emissions |            | Direct anthropogenic emissions |            |
|-------------------------|-----------------|------------|----------------------------------------------|------------|--------------------------------|------------|
|                         | Bottom-up       | Top-down   | Bottom-up                                    | Top-down   | Bottom-up                      | Top-down   |
| USA                     | 49 [27-77]      | 38 [32-46] | 24 [7-43]                                    | 12 [7-22]  | 26 [19-34]                     | 25 [16-31] |
| Canada                  | 38 [14-71]      | 20 [17-24] | 32 [11-63]                                   | 14 [11-22] | 6 [3-8]                        | 7 [5-9]    |
| Central America         | 18 [10-28]      | 17 [14-19] | 8 [3-17]                                     | 5 [2-6]    | 10 [8-12]                      | 12 [11-13] |
| Northern South America  | 19 [9-35]       | 16 [13-20] | 10 [3-17]                                    | 9 [7-11]   | 9 [6-17]                       | 7 [6-8]    |
| Brazil                  | 51 [26-79]      | 47 [41-58] | 32 [11-57]                                   | 26 [22-36] | 19 [16-22]                     | 21 [17-26] |
| Southwest South America | 34 [16-51]      | 38 [30-48] | 21 [6-35]                                    | 24 [16-34] | 13 [10-16]                     | 14 [12-17] |
| Europe                  | 42 [29-57]      | 31 [24-36] | 17 [6-30]                                    | 7 [5-9]    | 25 [22-27]                     | 24 [20-31] |
| Northern Africa         | 24 [18-33]      | 25 [23-29] | 7 [2-13]                                     | 6 [6-8]    | 18 [16-20]                     | 19 [17-21] |
| Equatorial Africa       | 47 [28-83]      | 47 [39-59] | 23 [10-49]                                   | 24 [20-30] | 24 [19-34]                     | 23 [19-29] |
| Southern Africa         | 21 [5-43]       | 19 [16-24] | 11 [2-29]                                    | 8 [7-10]   | 10 [3-14]                      | 11 [10-12] |
| Russia                  | 48 [24-83]      | 36 [27-45] | 25 [9-47]                                    | 14 [11-18] | 23 [15-36]                     | 21 [14-29] |
| Central Asia            | 15 [6-29]       | 10 [8-13]  | 8 [2-19]                                     | 1 [0-2]    | 8 [4-10]                       | 9 [7-11]   |
| Middle East             | 35 [21-47]      | 31 [24-39] | 9 [3-15]                                     | 4 [1-6]    | 26 [18-31]                     | 28 [20-34] |
| China                   | 71 [55-99]      | 57 [37-72] | 15 [4-33]                                    | 4 [3-7]    | 57 [51-66]                     | 53 [34-66] |
| Korean-Japan            | 6 [4-12]        | 5 [4-6]    | 3 [1-7]                                      | 1 [1-1]    | 4 [3-5]                        | 4 [3-5]    |
| South Asia              | 58 [49-72]      | 52 [43-60] | 13 [5-25]                                    | 6 [5-6]    | 45 [44-47]                     | 45 [37-49] |
| Southeast Asia          | 64 [42-93]      | 63 [52-71] | 32 [19-54]                                   | 27 [20-34] | 32 [23-39]                     | 35 [31-46] |
| Australasia             | 16 [9-26]       | 13 [10-17] | 10 [4-19]                                    | 6 [4-7]    | 7 [6-7]                        | 7 [6-7]    |

Mis en forme : Police :9 pt, Gras

**Supprimé:** Figure 1: Globally averaged atmospheric CH<sub>4</sub> (ppb) (a) and its annual growth rate G<sub>ATM</sub> (ppb yr<sup>-1</sup>) (b) from four measurement programs, National Oceanic and Atmospheric Administration (NOAA), Advanced Global Atmospheric Gases Experiment (AGAGE), Commonwealth Scientific and Industrial Research Organisation (CSIRO), and University of California, Irvine (UCI). Detailed descriptions of methods are given in the supplementary material of Kirschke et al. (2013).<object>Saut de page

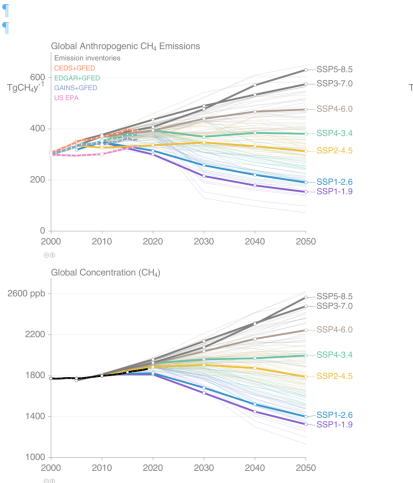

**Figure 2:** Top: Global anthropogenic methane emissions (including biomass burning) from historical inventories and future projections (in Tg CH<sub>4</sub> yr<sup>-1</sup>). Top left panel shows inventories and the unharmonized Shared Socioeconomic Pathways (Riahi et al., 2017), with highlighted scenarios representing scenarios assessed in CMIP6 (O'Neill, et al., 2016). Top right panel shows the selected scenarios harmonized with historical emissions (CEDS) for CMIP6 activities (Gidden et al., 2019). USEPA and GAINS estimates have been linearly interpolated from the 5-year original products to yearly values. After 2005, USEPA original estimates are projections. Bottom left: Global methane concentrations for NOAA surface site observations (black) and projections based on SSPs (Riahi et al., 2017) with concentrations estimated using MAGICC (Meinshausen et al., 2011).

... [625]

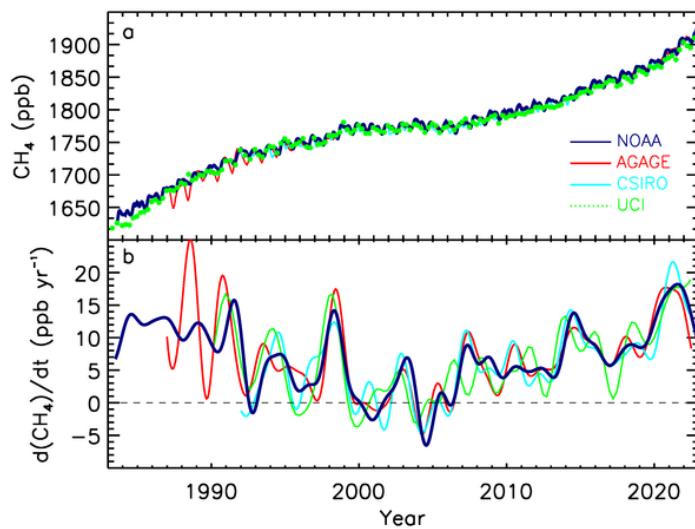

**Figure 1: Globally averaged atmospheric CH<sub>4</sub> concentrations (ppb) (a) and annual growth rates  $G_{\text{ATM}}$  (ppb yr<sup>-1</sup>) (b) between 1983 and 2022, from four measurement programs, National Oceanic and Atmospheric Administration (NOAA), Advanced Global Atmospheric Gases Experiment (AGAGE), Commonwealth Scientific and Industrial Research Organisation (CSIRO), and University of California, Irvine (UCI). Detailed descriptions of methods are given in the supplementary material of Kirschke et al. (2013).**

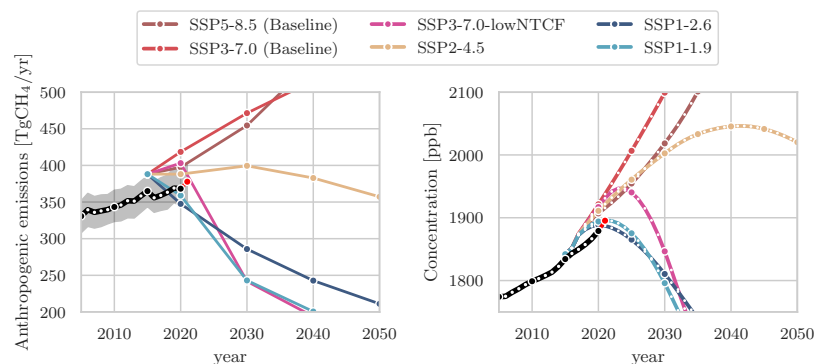

**Figure 2:** Left: Global anthropogenic methane emissions (including biomass burning) over 2005-2050 from historical inventories (black line and grey shaded area) and future projections (colored lines) (in Tg CH<sub>4</sub> yr<sup>-1</sup>) from selected scenarios harmonized with historical emissions (CEDS) for CMIP6 activities (Gidden et al., 2019). Historical mean emissions correspond to the average of anthropogenic inventories listed in Table 1 added to the GFEDv4.1s (van der Werf et al., 2017) biomass burning historical emissions. Right: Global atmospheric methane concentrations for NOAA surface site observations (black) and projections based on SSPs (Riahi et al., 2017) with concentrations estimated using MAGICC (Meinshausen et al., 2017, 2020). Red dots show the last year available (2022 for observations).

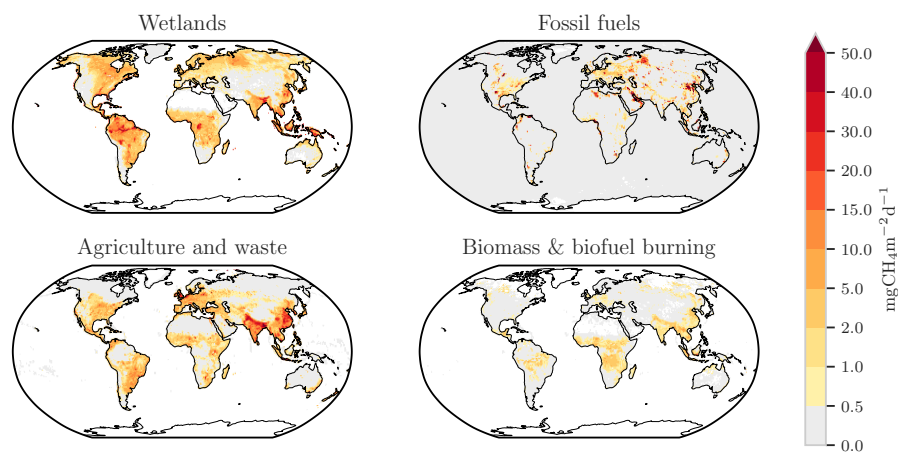

Figure 3: Methane emissions from four source categories: natural wetlands (excluding lakes, ponds, and rivers), biomass and biofuel burning, ~~agriculture~~ and ~~waste~~, and ~~fossil~~ fuels for the 2010-2019 decade in  $\text{mg CH}_4 \text{m}^{-2} \text{day}^{-1}$ . The wetland emission map represents the mean daily emission average over the 16 biogeochemical models listed in Table 2 and over the 2010-2019 decade. Fossil fuel and Agriculture and Waste emission maps are derived from the mean estimates of gridded CEDS, ~~EGDARv6~~, ~~EDGARv7~~ and GAINS models. The biomass and biofuel burning map results from the mean of the biomass burning inventories listed in Table 1 added to the mean of the biofuel estimate from CEDS, (O'Rourke et al., 2021), ~~EDGARv6~~ (Crippa et al., 2021), ~~EDGARv7~~ (Crippa et al., 2023) and GAINS (Höglund-Isaksson et al., (2020)) models.

Supprimé: Agriculture  
 Supprimé: Waste  
 Supprimé: Fossil  
 Supprimé: 2008-2017  
 Supprimé: 13  
 Supprimé: 2008-2017  
 Supprimé: EGDARv4.3.2  
 Supprimé: , EDGARv4.3.2 and GAINS



# Wetlands and Inland Freshwaters Methane Cycle

Million tons of CH<sub>4</sub> per year (Tg CH<sub>4</sub>/yr), on average 2010-2019

Anthropogenic flux  
Natural flux  
Anthropogenic and natural flux

CC BY SA  
Creative Commons BY-SA  
Credit must be given to the  
creator. Adaptations must be  
shared under the same terms.

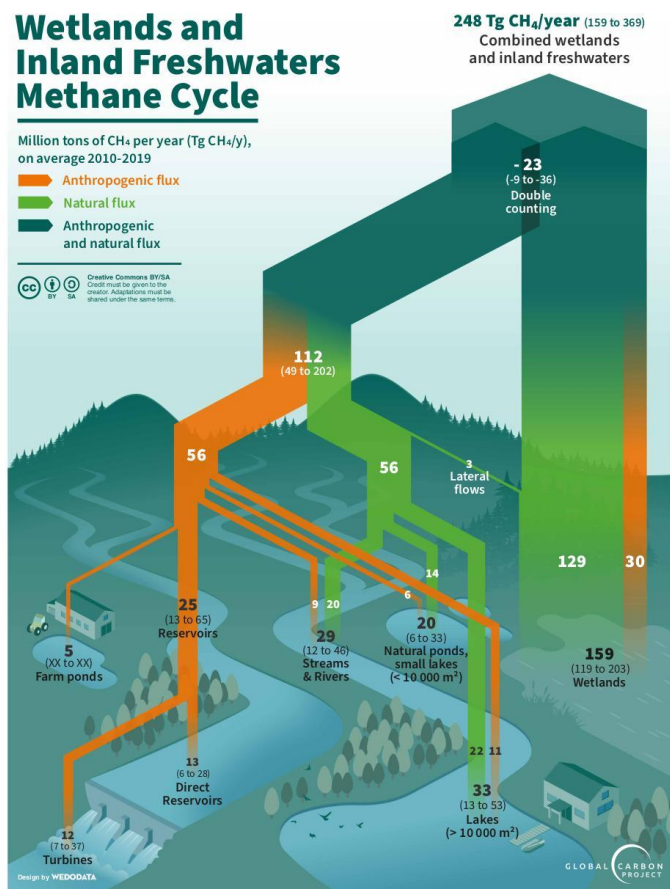

Figure 4: Estimation of wetland and inland freshwater emissions over the 2010-2019 decade in Tg CH<sub>4</sub> yr<sup>-1</sup>. The fluxes related to voluntary (such as through reservoirs or farm ponds) or involuntary (land use or eutrophication-related) perturbations of the methane cycle are shown here in orange. However, they are accounted for into the “natural and indirect anthropogenic” sources in the Table 3 budget and depicted as natural sources in Fig. 7.

## Geological

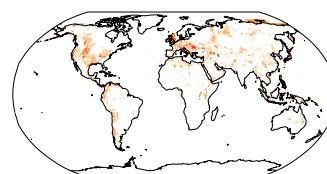

## Ocean

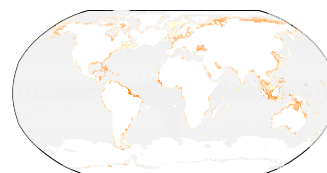

Supprimé:

Mis en forme : Police :10 pt

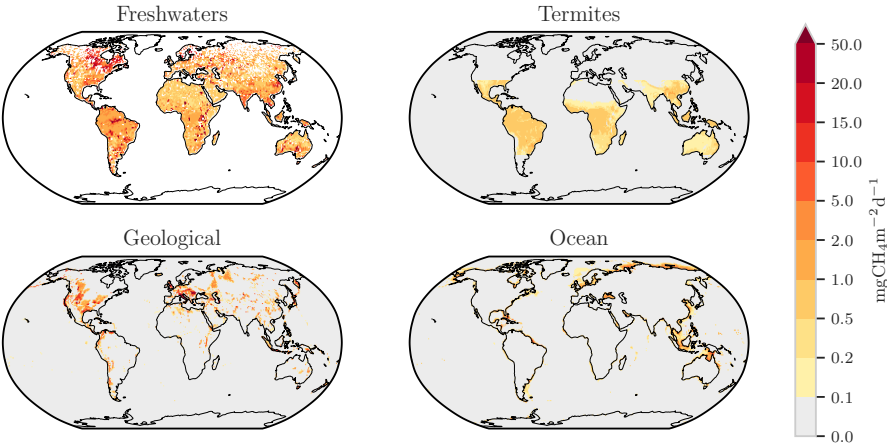

**Figure 5:** Methane emissions ( $\text{mg CH}_4 \text{ m}^{-2} \text{ day}^{-1}$ ) from four natural and indirect anthropogenic sources: inland freshwaters (includes lakes, ponds (Johnson et al., 2022.), reservoirs (Johnson et al., 2021) and stream and rivers (Rocher-Ros et al., 2023) with a global total scaled to  $89 \text{ Tg yr}^{-1}$ , geological (Etiope et al., 2019), termites (this study) and oceans (Weber et al., 2019).

**Supprimé:** three natural sources (left color scale):

**Supprimé:** ), and methane uptake in soils ( $\text{mg CH}_4 \text{ m}^{-2} \text{ day}^{-1}$ ) presented in positive units (right color scale), and based on Murguía-Flores et al. (2018)

**Mis en forme :** Police :11 pt, Couleur de police : Noir

**Mis en forme :** Espace Avant : 11 pt, Après : 2 pt, Paragraphes solidaires, Lignes solidaires, Bordure : Haut: (Pas de bordure), Bas: (Pas de bordure), Gauche: (Pas de bordure), Droite: (Pas de bordure), Entre : (Pas de bordure)

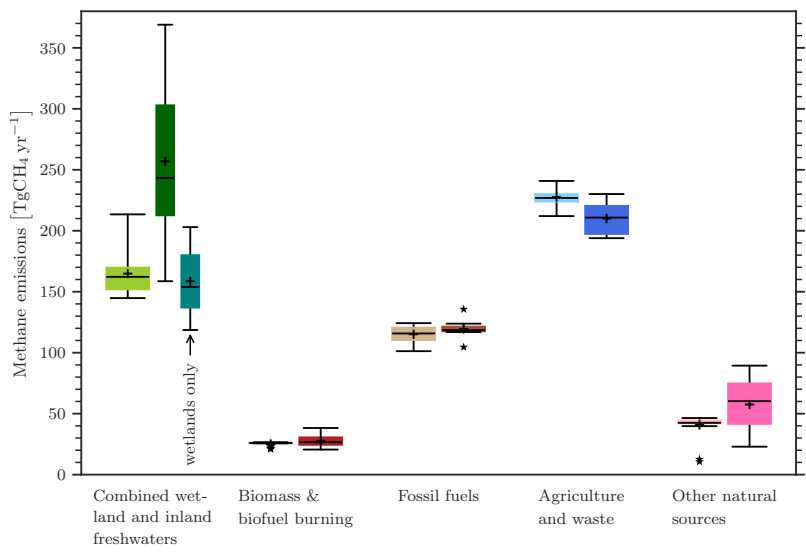

**Figure 6:** Methane global emissions from five broad categories (see Sect. 2.3) for the 2010-2019 decade for top-down inversion models (left light coloured boxplots) in Tg CH<sub>4</sub> yr<sup>-1</sup> and for bottom-up models and inventories (right dark coloured boxplots). For combined wetland and inland freshwaters three estimates are given: left = top-down estimates, middle = bottom-up estimates, right = bottom-up estimates for wetlands only. Median value, first and third quartiles are presented in the boxes. The whiskers represent the minimum and maximum values when suspected outliers are removed (see Sect. 2.2). Suspected outliers are marked with stars. Bottom-up quartiles are not available for bottom-up estimates, except for wetland emissions. Mean values are represented with “+” symbols, these are the values reported in Table 3.

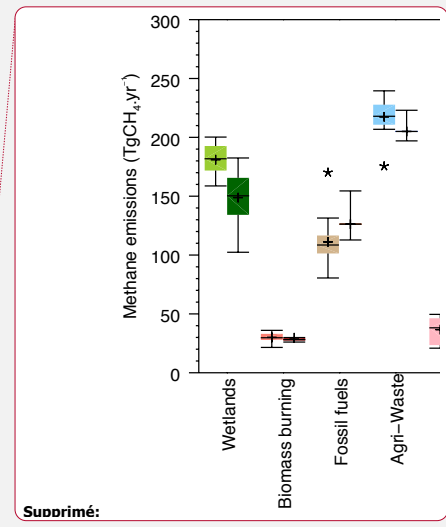

Supprimé:

- Supprimé: 5
- Supprimé: the
- Supprimé: 2008-2017
- Supprimé: inversions
- Supprimé: when existing.

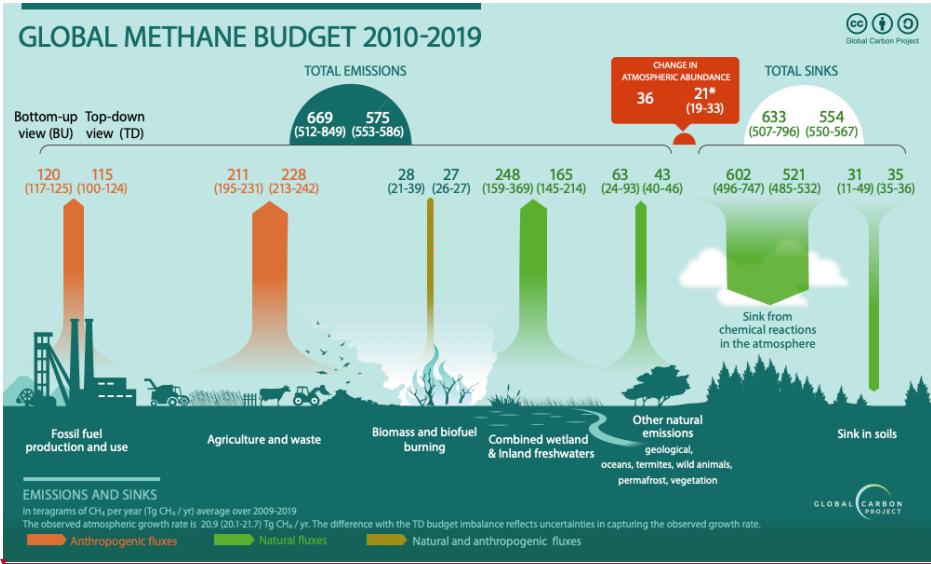

**Figure 2:** Global Methane Budget for the **2010-2019 decade**. Both bottom-up (left) and top-down (right) estimates are provided for each emission and sink category in Tg CH<sub>4</sub> yr<sup>-1</sup>, as well as for total emissions and total sinks. Biomass and biofuel burning emissions are depicted here as both natural and anthropogenic emissions while they are fully included in anthropogenic emissions in the budget tables and text (Sect. 3.1.5). **Combined wetland and inland freshwaters are depicted as fully natural while part has been attributed an indirect anthropogenic component (Sect. 3.2.2 and Figure 4).**

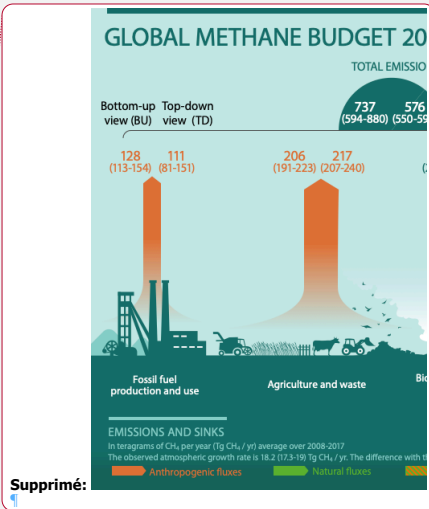

Supprimé: 6

Supprimé: 2008-2017 decades

Supprimé: ).

Mis en forme : Couleur de police : Rouge

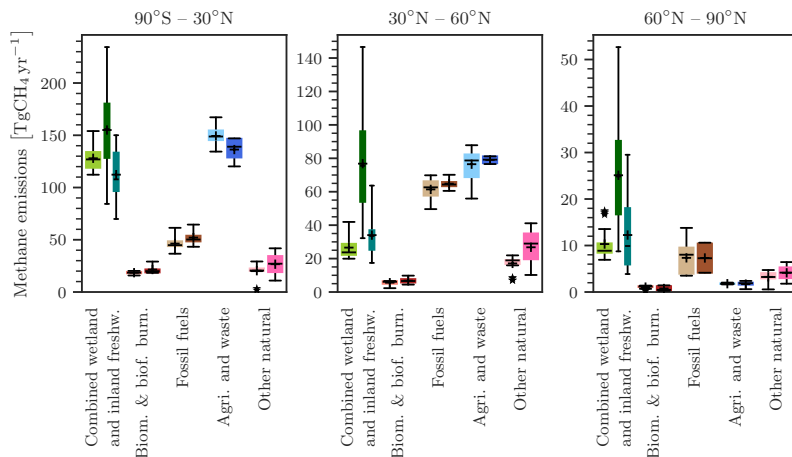

**Figure 8:** Methane latitudinal emissions from five broad categories (see Sect. 2.3) for the 2010-2019 decade for top-down inversion models (left light coloured boxplots) in Tg CH<sub>4</sub> yr<sup>-1</sup> and for bottom-up models and inventories (right dark coloured boxplots). For combined wetland and inland freshwaters three estimates are given: left = top-down estimates, middle = bottom-up estimates, right = bottom-up estimates for wetlands only. Median value, first and third quartiles are presented in the boxes. The whiskers represent the minimum and maximum values when suspected outliers are removed (see Sect. 2.2). Suspected outliers are marked with stars. Bottom-up quartiles are not available for bottom-up estimates, except wetland emissions. Mean values are represented with "+" symbols, these are the values reported in Table 6.

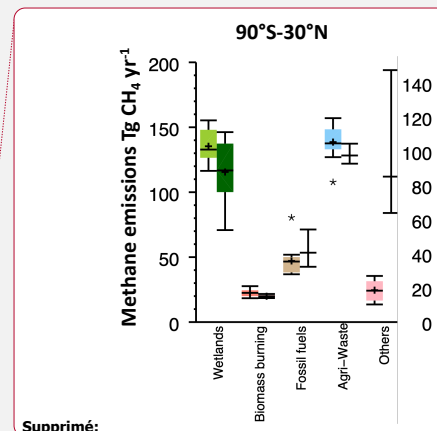

Supprimé: 7

Supprimé: the

Supprimé: 2008-2017

Supprimé: inversions

Supprimé: as shown

Mis en forme : Police : 9 pt, Gras

Mis en forme : Justifié, Espace Après : 10 pt

Supprimé: .....Saut de section (page suivante).....  
Table A1.

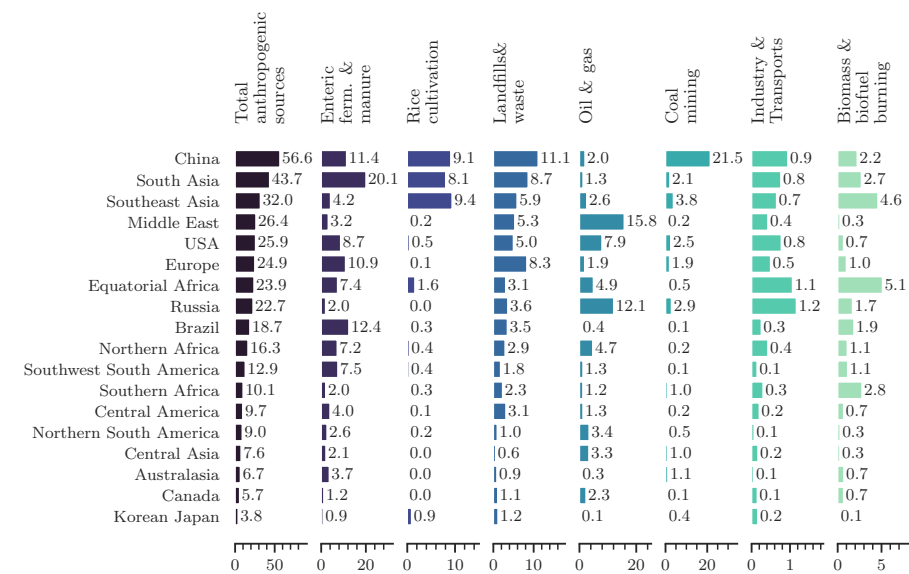

Figure 9: Regional anthropogenic emissions for the 2010-2019 decade from bottom-up estimates in Tg CH<sub>4</sub> yr<sup>-1</sup>. Regions are ranked by their total anthropogenic emissions. Note that each category has its own emission scale.

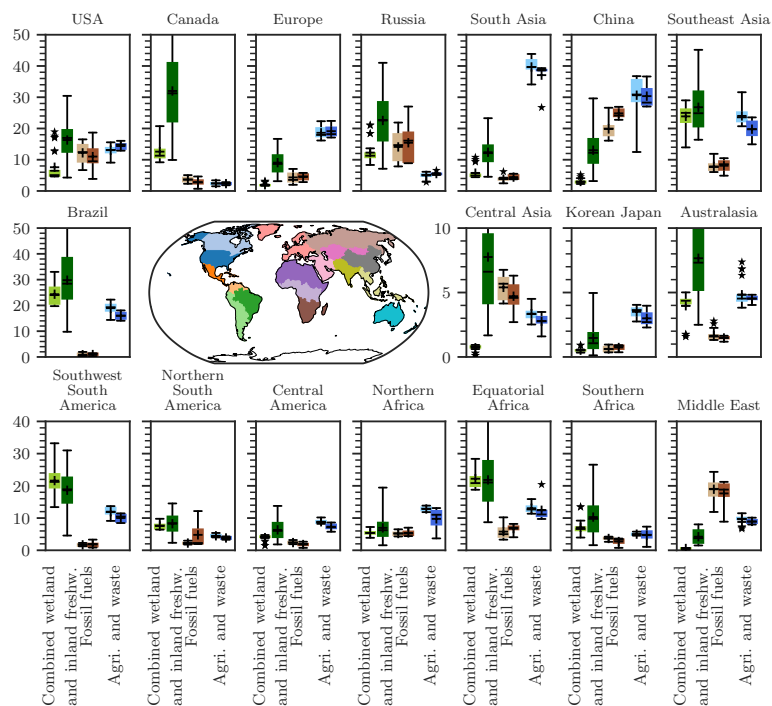

**Figure 10: Regional emissions for three broad main emissions categories for the 2010-2019 decade: Combined wetland and inland freshwaters, fossil fuel and agriculture & waste from top-down estimates (left box-plots- and bottom-up estimates (right boxplots). The inner map shows the region's distribution (see also Supplementary material, Table S1 and Fig. S3). More categories are presented in the Supplementary Material in Figure S6.**



**Table A1.** Comparison of terminologies used in this study and previous reports for methane sources.

| <u>GCP terminology (This study)</u> |                                                   | <u>IPCC AR6 (Canadell et al., 2021)</u>           | <u>National GHG inventories (used by UNFCCC according to IPCC (2006) and IPCC (2019))</u> | <u>IPCC (2006, 2019) Source sector numbering</u> |
|-------------------------------------|---------------------------------------------------|---------------------------------------------------|-------------------------------------------------------------------------------------------|--------------------------------------------------|
| <u>Anthropogenic Sources</u>        |                                                   |                                                   |                                                                                           |                                                  |
| <u>Fossil fuels</u>                 | <u>Coal Mining</u>                                | <u>Coal Mining</u>                                | <u>Fugitive emissions from Fuels / Solid fuels</u>                                        | <u>1B1</u>                                       |
|                                     | <u>Oil and gas</u>                                | <u>Oil and gas</u>                                | <u>Fugitive emissions from Fuels / Oil and natural gas</u>                                | <u>1B2</u>                                       |
|                                     | <u>Transport</u>                                  | <u>Transport</u>                                  | <u>Transport</u>                                                                          | <u>1A3</u>                                       |
|                                     | <u>Industry</u>                                   | <u>Industry</u>                                   | <u>Mineral, chemical, metal industry and others</u>                                       | <u>2A, 2B, 2C, 2D, 2E</u>                        |
|                                     |                                                   |                                                   | <u>Energy/fuel Combustion activities</u>                                                  | <u>1A except 1A3 + 1B3</u>                       |
| <u>Agriculture</u>                  | <u>Enteric fermentation and manure management</u> | <u>Enteric fermentation and manure management</u> | <u>Livestock</u>                                                                          | <u>3A</u>                                        |
|                                     | <u>Rice cultivation</u>                           | <u>Rice cultivation</u>                           | <u>Rice cultivation</u>                                                                   | <u>3C7</u>                                       |
| <u>Waste</u>                        | <u>Landfills and waste</u>                        | <u>Landfills and waste</u>                        | <u>Waste</u>                                                                              | <u>4</u>                                         |
| <u>Biofuel and biomass burning</u>  | <u>Biofuel burning</u>                            | <u>Biofuel burning</u>                            | <u>Biofuel burning</u>                                                                    | <u>1A4b</u>                                      |
|                                     | <u>Biomass burning</u>                            | <u>Biomass burning</u>                            | <u>Biomass burning</u>                                                                    | <u>3C1</u>                                       |
| <u>Natural and indirect sources</u> |                                                   |                                                   |                                                                                           |                                                  |
| <u>Wetlands</u>                     | <u>Wetlands</u>                                   | <u>Wetlands</u>                                   | <u>--</u>                                                                                 | <u>--</u>                                        |
| <u>Inland freshwaters</u>           | <u>Reservoirs</u>                                 | <u>included in Inland freshwaters</u>             | <u>Land (incl Reservoirs)</u>                                                             | <u>in 3B</u>                                     |
|                                     | <u>Lakes, ponds, and rivers</u>                   | <u>incl in Inland freshwaters</u>                 | <u>only canal, ditches and ponds for human uses</u>                                       | <u>in 3B</u>                                     |
| <u>Other natural sources</u>        | <u>Oceans</u>                                     | <u>Oceans</u>                                     | <u>--</u>                                                                                 | <u>--</u>                                        |
|                                     | <u>Termites</u>                                   | <u>Termites</u>                                   | <u>--</u>                                                                                 | <u>--</u>                                        |

|  |                                    |                                    |    |    |
|--|------------------------------------|------------------------------------|----|----|
|  | <a href="#">Geological sources</a> | <a href="#">Geological sources</a> | -- | -- |
|--|------------------------------------|------------------------------------|----|----|

**Table A2.** Summary of methodological changes since the previous budget (Saunois et al., 2020). No significant changes have been applied to the vegetation (Sect. 3.2.8), wild animal (Sect. 3.2.5) and terrestrial permafrost and hydrates (Sect 3.2.7) estimates, though literature has been expanded and/or updated.

|                                                                                                          | Saunois et al. (2020)                                                                                                                    | This study                                                                                                                                                                                                                                |
|----------------------------------------------------------------------------------------------------------|------------------------------------------------------------------------------------------------------------------------------------------|-------------------------------------------------------------------------------------------------------------------------------------------------------------------------------------------------------------------------------------------|
| <u>Regions definition (Table S1, Fig S3)</u>                                                             | <u>18 continental regions + ocean</u>                                                                                                    | <u>same regions except the last region including only Australia and New-Zealand and called Australasia</u>                                                                                                                                |
| <u>Anthropogenic global inventories (See Table 1, Sect 3.1.1)</u>                                        | <u>CEDS, EDGARv4.3.2, USEPA (2012), FAO and GAINS ECLIPSE v6</u>                                                                         | <u>CEDS, EDGARv6 and v7, USEPA (2019), FAO, IIASA GAINS v4</u><br><u>Add estimate of ultra emitters from Lauvaux et al. (2022)</u>                                                                                                        |
| <u>Biomass burning data sets</u>                                                                         | <u>FINNV1.5, GFASv1.3, GFEDv4.1s, QFEDv2.5</u>                                                                                           | <u>FINNV2.5, GFASv1.3, GFEDv4.1s, QFEDv2.5</u>                                                                                                                                                                                            |
| <u>Estimate of wetland emissions (See Tables 2 and S3 and Section 3.2.1)</u>                             | <u>13 land surface models involved, runs with either prescribed areas or based on Hydrological scheme, single meteorological forcing</u> | <u>16 land surface models involved, runs with either prescribed areas or based on Hydrological scheme, two sets of meteorological forcings</u>                                                                                            |
| <u>Estimate of reservoirs emissions (Sect.3.2.2)</u>                                                     | <u>based on Deemer et al. (2016)</u>                                                                                                     | <u>based on Johnson et al. (2021), Rosentreter et al. (2021) and Harrison et al. (2021)</u>                                                                                                                                               |
| <u>Estimate of lakes and ponds emissions (Sect.3.2.2)</u>                                                | <u>based on Bastviken et al. (2011), Wik et al. (2016b) and Tan and Zhuang (2015)</u>                                                    | <u>lakes &gt; .1km<sup>2</sup> : based on Rosentreter et al. (2021), Zhuang et al. (2023) and Johnson et al. (2022)</u><br><u>lakes and ponds &lt; 0.1 km<sup>2</sup> : based on Rosentreter et al. (2021), and Johnson et al. (2022)</u> |
| <u>Estimates of stream and river emissions (Sect.3.2.2)</u>                                              | <u>From Stanley et al. (2016)</u>                                                                                                        | <u>based on Rosentreter et al. (2021) and Rocher-Ros et al. (2023)</u>                                                                                                                                                                    |
| <u>Estimates of the anthropogenic perturbation component of inland freshwater emissions (Sect.3.2.2)</u> | <u>---</u>                                                                                                                               | <u>based on several individual studies on the effect of eutrophication on emissions from lakes, and ponds (See text in Sect. 3.2.2)</u>                                                                                                   |
| <u>Estimate of the double counting in the aquatic systems (Sect.3.2.2)</u>                               | <u>---</u>                                                                                                                               | <u>due to the accounting of small lakes and ponds (&lt;0.1km<sup>2</sup>) in the vegetated wetlands areas used in land surface models and to lateral transport from vegetated wetland to rivers.</u>                                      |

|                                                                                                                         |                                                                                                                                                                                    |                                                                                                                                                                                                                                                                        |
|-------------------------------------------------------------------------------------------------------------------------|------------------------------------------------------------------------------------------------------------------------------------------------------------------------------------|------------------------------------------------------------------------------------------------------------------------------------------------------------------------------------------------------------------------------------------------------------------------|
| <a href="#">Geological sources (Sect 3.2.3) - onshore and offshore</a>                                                  | <a href="#">based on Etiope and Schwietzke et al. (2019)</a>                                                                                                                       | <a href="#">same as in Saunio et al. (2020)</a>                                                                                                                                                                                                                        |
| <a href="#">Termite emissions (Sect. 3.2.4)</a>                                                                         | <a href="#">GPP : Zhang et al. (2017)</a><br><a href="#">termite biomass: Jung et al. (2011)</a><br><a href="#">EF : Kirshke et al. (2013) and Fraser et al., 1986)</a>            | <a href="#">GPP: Wild et al. (2022)</a><br><a href="#">termite biomass: based on different studies depending on regions (see text)</a><br><a href="#">EF: Sugimoto et al. (1998)</a><br><a href="#">Applied a correction factor for mound from Nauer et al. (2018)</a> |
| <a href="#">Oceanic sources (Sect 3.2.6)</a>                                                                            | <a href="#">modern biogenic: based on Wuebbles and Hayhoe (2002) , Laruelle et al. (2013) and Rosentreter et al. (2018);</a><br><a href="#">geological: based on Etiope (2019)</a> | <a href="#">modern biogenic: based on Rosentreter et al. (2021;2023) and Laruelle et al. (2023)</a><br><a href="#">geological: based on Etiope (2019)</a>                                                                                                              |
| <a href="#">Tropospheric OH oxidation (Sect 3.3.2) and stratospheric loss (Sect 3.3.3) (See Supplementary Table S4)</a> | <a href="#">based on results from 11 models contributing to the Chemistry Climate Model Initiative (Morgenstern et al., 2017)</a>                                                  | <a href="#">based on results from 11 models contributing to the Chemistry Climate Model Initiative 2022 (Plummer et al., 2021) and the CMIP6 simulations (Collins et al., 2017)</a>                                                                                    |
| <a href="#">Tropospheric reaction with Cl</a>                                                                           | <a href="#">based on Hossaini et al. (2016), Wang et al. (2019b) and Gromov (2018)</a>                                                                                             | <a href="#">based on Hossaini et al (2016), Sherwenn et al. (2016), Wang et al (2019b, 2021b) and Gromov (2018)</a>                                                                                                                                                    |
| <a href="#">Soil uptake (See Table S6)</a>                                                                              | <a href="#">based on Tian et al. (2016)</a>                                                                                                                                        | <a href="#">based on VISIT, JSBACH en MeMo surface models.</a>                                                                                                                                                                                                         |
| <a href="#">Estimates through top-down approaches (See table S7 and S8 to S11)</a>                                      | <a href="#">9 inverse systems contributing, prior fluxes based on EDGARv4.2 or v4.3.2 for most inversions. Most inversion used constant OH.</a>                                    | <a href="#">7 inverse systems contributing, runs with constant and varying OH, prior fluxes based on either EDGARv6 or GAINS</a>                                                                                                                                       |

**Table A3.** Funding supporting the production of the various components of the global methane budget in addition to the authors' supporting institutions (see also acknowledgements).

| Funder and grant number (where relevant)                                                                                                                                                                                               | Authors/Simulations/Observation                                           |
|----------------------------------------------------------------------------------------------------------------------------------------------------------------------------------------------------------------------------------------|---------------------------------------------------------------------------|
| Director, Office of Science, Office of Biological and Environmental Research of the US Department of Energy under Contract No. DE-AC02-05CH11231 to Lawrence Berkeley National Laboratory as part of the RUBISCO Scientific Focus Area | WJR, OZ, E3SM/ELM simulations                                             |
| Funded by NASA's Interdisciplinary Research in Earth Science (IDS) Program and the NASA Terrestrial Ecology and Tropospheric Composition Programs                                                                                      | MSJ: lake and reservoir bottom-up methane emission data sets              |
| Funded by Agence National de la Recherche through the project Advanced Methane Budget through Multi-constraints and Multi-data streams Modelling (AMB-M <sup>2</sup> ) - (ANR-21-CE01-0030)                                            | AM, MS                                                                    |
| The Environment Research and Technology Development Fund (JPMEERF21S20800) of the Environmental Restoration and Conservation Agency provided by Ministry of the Environment of Japan                                                   | YN, NISMON-CH <sub>4</sub>                                                |
| Funded by the German Federal Ministry of Education and Research (BMBF) via the "PalMod" project, grant No. 01LP1921A                                                                                                                   | TK: CH <sub>4</sub> emission modelling with JSBACH and LPJ-MPI            |
| Funded by the Swedish Research Council VR (2020-05338) and Swedish National Space Agency (209/19)                                                                                                                                      | WZ: LPJ-GUESS simulations                                                 |
| Funded by BELSPO (project FedTwin ReCAP), EU Horizon 2020 project ESM2025 (nr. 101003536) and FRNS PDR project CH4-lake (T.0191.23)                                                                                                    | PR: inland water, coastal and oceanic CH <sub>4</sub> emission synthesis  |
| EU H2020 (725546 ERC METLAKE and 101015825 TRIAGE), Swedish Research Councils VR (2022-03841) and Formas (2018-01794)                                                                                                                  | DB: inland waters - data and bottom up estimation                         |
| Supported by the Newton Fund through the Met Office Climate Science for Service Partnership Brazil (CSSP Brazil)                                                                                                                       | NG: JULES simulations                                                     |
| Funded by United Nations Environment Programme, Stanford University DTIE21-EN3143                                                                                                                                                      | RBJ: inversions and general budget support                                |
| the Joint Fund for Regional Innovation and Development of the National Natural Science Foundation (Grant No. U22A20570); the Natural Sciences and Engineering Research Council of Canada (NSERC, #371706)                              | Changhui Peng/TRIPLEX-GHG                                                 |
| <b>Computing Resources</b>                                                                                                                                                                                                             |                                                                           |
| LSCE computing resources                                                                                                                                                                                                               | Marielle Sauniois, Philippe Bousquet, Joël Thanwerdas and Adrien Martinez |
| NASA High-End Computing (HEC) Program through the NASA Advanced Supercomputing (NAS) Division at NASA Ames Research Center                                                                                                             | Matthew S. Johnson (MSJ)                                                  |
| Deutsches Klimarechenzentrum (DKRZ), Hamburg, Germany                                                                                                                                                                                  | Thomas Kleinen (TK)                                                       |

|                                                                |           |
|----------------------------------------------------------------|-----------|
| Mis en forme                                                   | ... [626] |
| Mis en forme                                                   | ... [628] |
| Mis en forme                                                   | ... [627] |
| Mis en forme                                                   | ... [631] |
| Mis en forme                                                   | ... [629] |
| Tableau mis en forme                                           | ... [630] |
| Supprimé: ARC Linkage project LP150100519                      | ... [632] |
| Mis en forme                                                   | ... [633] |
| Tableau mis en forme                                           | ... [634] |
| Supprimé: Joseph Canadell                                      |           |
| Mis en forme                                                   | ... [636] |
| Mis en forme                                                   | ... [635] |
| Supprimé: Environment Research and Technology Development Fund | ... [637] |
| Supprimé: Naveen Chandra and Prabir K. Patra                   |           |
| Mis en forme                                                   | ... [638] |
| Mis en forme                                                   | ... [639] |
| Mis en forme                                                   | ... [640] |
| Mis en forme                                                   | ... [641] |
| Tableau mis en forme                                           | ... [642] |
| Mis en forme                                                   | ... [643] |
| Supprimé: 2-1701                                               |           |
| Mis en forme                                                   | ... [644] |
| Supprimé: Yosuke Niwa                                          |           |
| Mis en forme                                                   | ... [646] |
| Supprimé: ,                                                    |           |
| Mis en forme                                                   | ... [645] |
| Supprimé: Environment Research and Technology Development Fund | ... [647] |
| Supprimé: Akihiko Ito                                          |           |
| Mis en forme                                                   | ... [648] |
| Mis en forme                                                   | ... [649] |
| Supprimé: Environment, Japan                                   |           |
| Mis en forme                                                   | ... [650] |
| Mis en forme                                                   | ... [651] |
| Supprimé: ESA GHG-CCI                                          | ... [652] |
| Mis en forme                                                   | ... [653] |
| Tableau mis en forme                                           | ... [654] |
| Mis en forme                                                   | ... [655] |
| Supprimé: (ERC; grant no. 725546, METLAKE                      |           |
| Supprimé: David Bastviken                                      |           |
| Mis en forme                                                   | ... [657] |
| Mis en forme                                                   | ... [656] |
| Supprimé: Pierre Regnier and Glen P. Peters                    |           |
| Supprimé: European Union's                                     |           |
| Mis en forme                                                   | ... [658] |
| Mis en forme                                                   | ... [659] |
| Supprimé: research                                             |           |
| Mis en forme                                                   | ... [660] |
| Supprimé: innovation programme under grant agreement           | ... [661] |
| Mis en forme                                                   | ... [662] |
| Mis en forme                                                   | ... [663] |
| Mis en forme                                                   | ... [664] |
| Supprimé: F.R.S.- FNRS for post-doctoral funding at the ULB    | ... [665] |
| Mis en forme                                                   | ... [666] |
| Tableau mis en forme                                           | ... [667] |

|                                                                                                                                                                                                                                                                                                                                                |                                                                                                                                                                            |                                                                                                                       |
|------------------------------------------------------------------------------------------------------------------------------------------------------------------------------------------------------------------------------------------------------------------------------------------------------------------------------------------------|----------------------------------------------------------------------------------------------------------------------------------------------------------------------------|-----------------------------------------------------------------------------------------------------------------------|
| <del>ALICE High Performance Computing Facility at the University of Leicester</del>                                                                                                                                                                                                                                                            | <del>GOSAT retrievals</del>                                                                                                                                                | <del>Supprimé: Swedish National Infrastructure for</del>                                                              |
| <del>FUJITSU PRIMERGY CX2550M5 at MRI and NEC SX-Aurora TSUBASA at NIES</del>                                                                                                                                                                                                                                                                  | <del>Yosuke Niwa (YN)</del>                                                                                                                                                | <del>Supprimé: (SNIC)</del>                                                                                           |
| <del>Support for atmospheric observations</del>                                                                                                                                                                                                                                                                                                |                                                                                                                                                                            | <del>Mis en forme : Espace Après : 6 pt</del>                                                                         |
| <del>Australian Antarctic Division</del>                                                                                                                                                                                                                                                                                                       | <del>CSIRO flask network</del>                                                                                                                                             | <del>Supprimé: Lund</del>                                                                                             |
| <del>Australian Institute of Marine Science</del>                                                                                                                                                                                                                                                                                              | <del>CSIRO flask network</del>                                                                                                                                             | <del>Supprimé: Centre for Scientific and Technical Computing (Lunarc), project no. 2017/1-423 – Aurora resource</del> |
| <del>Bureau of Meteorology (Australia)</del>                                                                                                                                                                                                                                                                                                   | <del>Kennaook/Cape Grim AGAGE, CSIRO flask network</del>                                                                                                                   | <del>Supprimé: LPJGUESS Simulations</del>                                                                             |
| <del>Commonwealth Scientific and Industrial Research Organisation (CSIRO, Australia)</del>                                                                                                                                                                                                                                                     | <del>Kennaook/Cape Grim AGAGE, CSIRO flask network</del>                                                                                                                   | <del>Tableau mis en forme</del>                                                                                       |
| <del>Department of Climate Change, Energy, the Environment and Water (DCCEEW, Australia)</del>                                                                                                                                                                                                                                                 | <del>Kennaook/Cape Grim AGAGE</del>                                                                                                                                        | <del>Mis en forme : Anglais (G.B.)</del>                                                                              |
| <del>Meteorological Service of Canada</del>                                                                                                                                                                                                                                                                                                    | <del>CSIRO flask network</del>                                                                                                                                             | <del>Mis en forme : Anglais (G.B.)</del>                                                                              |
| <del>NASA: grants NAG5-12669, NNX07AE89G, NNX11AF17G, NNX16AC98G and 80NSSC21K1369 to MIT, with subawards to the University of Bristol (for Barbados and Mace Head) and CSIRO (for Kennaook/Cape Grim); grants NAG5-4023, NNX07AE87G, NNX07AF09G, NNX11AF15G, NNX11AF16G, NNX16AC96G, NNX16AC97G, 80NSSC21K1210 and 80NSSC21K1201 to SIO</del> | <del>AGAGE calibrations and measurements at SIO, La Jolla and AGAGE station operations at Trinidad Head, Mace Head, Barbados, American Samoa, and Kennaook/Cape Grim</del> | <del>Mis en forme : Police :Gras</del>                                                                                |
| <del>National Oceanic and Atmospheric Administration (NOAA, USA) contract RA133R15CN0008 to the University of Bristol</del>                                                                                                                                                                                                                    | <del>Barbados</del>                                                                                                                                                        | <del>Tableau mis en forme</del>                                                                                       |
| <del>NOAA USA</del>                                                                                                                                                                                                                                                                                                                            | <del>CSIRO flask network</del>                                                                                                                                             | <del>Mis en forme : Espace Après : 6 pt</del>                                                                         |
| <del>Refrigerant Reclaim Australia</del>                                                                                                                                                                                                                                                                                                       | <del>Kennaook/Cape Grim AGAGE</del>                                                                                                                                        | <del>Mis en forme : Espace Après : 6 pt</del>                                                                         |
| <del>UK Department for Business, Energy &amp; Industrial Strategy (BEIS) contract TRN1537/06/2018 and TRN 5488/11/2021 to the University of Bristol</del>                                                                                                                                                                                      | <del>Mace Head</del>                                                                                                                                                       | <del>Mis en forme : Espace Après : 6 pt</del>                                                                         |
| <del>National Oceanic and Atmospheric Administration (NOAA, USA)</del>                                                                                                                                                                                                                                                                         | <del>Cape Matatula</del>                                                                                                                                                   | <del>Mis en forme : Anglais (G.B.)</del>                                                                              |
| <del>Japanese Ministry of Environment</del>                                                                                                                                                                                                                                                                                                    | <del>GOSAT data, Robert Parker</del>                                                                                                                                       | <del>Supprimé: and</del>                                                                                              |
| <del>Japanese Aerospace Exploration Agency, National Institute for Environmental Studies</del>                                                                                                                                                                                                                                                 | <del>GOSAT data, Robert Parker</del>                                                                                                                                       | <del>Supprimé: ;</del>                                                                                                |
| <del>NERC UK: grants NE/W004895/1, NE/R016518/1 and NE/X019071/1</del>                                                                                                                                                                                                                                                                         | <del>GOSAT data, Robert Parker</del>                                                                                                                                       | <del>Supprimé: and</del>                                                                                              |
| <del>The Swedish Research Council VR (2022-04839), European Space Agency projects AMPAC-Net and CCI+ permafrost, European Union's Horizon 2020 Research and Innovation Programme to the Nunataryuk project (no. 773421)</del>                                                                                                                  | <del>Permafrost region, Gustaf Hugelius</del>                                                                                                                              | <del>Mis en forme : Anglais (G.B.)</del>                                                                              |
|                                                                                                                                                                                                                                                                                                                                                |                                                                                                                                                                            | <del>Supprimé: AGAGE stations and SIO calibration</del>                                                               |
|                                                                                                                                                                                                                                                                                                                                                |                                                                                                                                                                            | <del>Mis en forme : Anglais (G.B.)</del>                                                                              |
|                                                                                                                                                                                                                                                                                                                                                |                                                                                                                                                                            | <del>Mis en forme : Espace Après : 6 pt</del>                                                                         |
|                                                                                                                                                                                                                                                                                                                                                |                                                                                                                                                                            | <del>Mis en forme : Espace Après : 6 pt</del>                                                                         |
|                                                                                                                                                                                                                                                                                                                                                |                                                                                                                                                                            | <del>Mis en forme : Espace Après : 6 pt</del>                                                                         |
|                                                                                                                                                                                                                                                                                                                                                |                                                                                                                                                                            | <del>Mis en forme : Espace Après : 6 pt</del>                                                                         |
|                                                                                                                                                                                                                                                                                                                                                |                                                                                                                                                                            | <del>Supprimé: ALICE High Performance Computing Facility at the University of Leicester</del>                         |
|                                                                                                                                                                                                                                                                                                                                                |                                                                                                                                                                            | <del>Mis en forme : Espace Après : 6 pt</del>                                                                         |
|                                                                                                                                                                                                                                                                                                                                                |                                                                                                                                                                            | <del>Supprimé: GOSAT retrievals</del>                                                                                 |
|                                                                                                                                                                                                                                                                                                                                                |                                                                                                                                                                            | <del>Mis en forme : Espace Après : 6 pt</del>                                                                         |
|                                                                                                                                                                                                                                                                                                                                                |                                                                                                                                                                            | <del>Mis en forme : Espace Après : 6 pt</del>                                                                         |
|                                                                                                                                                                                                                                                                                                                                                |                                                                                                                                                                            | <del>Supprimé: ¶</del>                                                                                                |

Page 1 : [1] Définition du style

03/05/2024 16:41:00

Sous-titre

Page 1 : [1] Définition du style

03/05/2024 16:41:00

Sous-titre

Page 1 : [1] Définition du style

03/05/2024 16:41:00

Sous-titre

Page 1 : [1] Définition du style

03/05/2024 16:41:00

Sous-titre

Page 1 : [1] Définition du style

03/05/2024 16:41:00

Sous-titre

Page 1 : [1] Définition du style

03/05/2024 16:41:00

Sous-titre

Page 1 : [1] Définition du style

03/05/2024 16:41:00

Sous-titre

Page 1 : [1] Définition du style

03/05/2024 16:41:00

Sous-titre

Page 1 : [1] Définition du style

03/05/2024 16:41:00

Sous-titre

Page 1 : [2] Supprimé

03/05/2024 16:41:00

▼

Page 1 : [2] Supprimé

03/05/2024 16:41:00

▼

Page 1 : [3] Supprimé

03/05/2024 16:41:00

▼

Page 1 : [3] Supprimé

03/05/2024 16:41:00

▼

Page 1 : [3] Supprimé

03/05/2024 16:41:00

▼

Page 1 : [4] Supprimé

03/05/2024 16:41:00



Page 1 : [4] Supprimé

03/05/2024 16:41:00

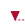

Page 1 : [5] Mis en forme

03/05/2024 16:41:00

Police :12 pt

Page 1 : [5] Mis en forme

03/05/2024 16:41:00

Police :12 pt

Page 1 : [6] Supprimé

03/05/2024 16:41:00

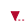

Page 1 : [6] Supprimé

03/05/2024 16:41:00

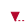

Page 1 : [6] Supprimé

03/05/2024 16:41:00

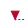

Page 1 : [6] Supprimé

03/05/2024 16:41:00

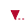

Page 1 : [6] Supprimé

03/05/2024 16:41:00

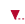

Page 1 : [6] Supprimé

03/05/2024 16:41:00

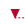

Page 1 : [6] Supprimé

03/05/2024 16:41:00

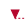

Page 1 : [6] Supprimé

03/05/2024 16:41:00

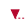

Page 1 : [6] Supprimé

03/05/2024 16:41:00

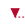

Page 1 : [6] Supprimé

03/05/2024 16:41:00

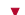

▼.....  
**Page 1 : [6] Supprimé** **03/05/2024 16:41:00**

▼.....  
**Page 1 : [7] Supprimé** **03/05/2024 16:41:00**

▼.....  
**Page 1 : [7] Supprimé** **03/05/2024 16:41:00**

**Page 1 : [7] Supprimé** **03/05/2024 16:41:00**

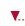

**Page 1 : [7] Supprimé** **03/05/2024 16:41:00**

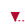

**Page 1 : [7] Supprimé** **03/05/2024 16:41:00**

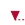

**Page 1 : [7] Supprimé** **03/05/2024 16:41:00**

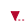

**Page 1 : [7] Supprimé** **03/05/2024 16:41:00**

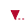

**Page 1 : [7] Supprimé** **03/05/2024 16:41:00**

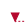

**Page 1 : [8] Supprimé** **03/05/2024 16:41:00**

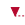

**Page 1 : [9] Mis en forme** **03/05/2024 16:41:00**

Bordure : Haut: (Pas de bordure), Bas: (Pas de bordure), Gauche: (Pas de bordure), Droite: (Pas de bordure), Entre : (Pas de bordure)

**Page 1 : [10] Supprimé** **03/05/2024 16:41:00**

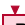

**Page 1 : [11] Mis en forme** **03/05/2024 16:41:00**

Bordure : Haut: (Pas de bordure), Bas: (Pas de bordure), Gauche: (Pas de bordure), Droite: (Pas de bordure), Entre : (Pas de bordure)

**Page 1 : [12] Mis en forme** **03/05/2024 16:41:00**

Droite : 1,32 cm, Bordure : Haut: (Pas de bordure), Bas: (Pas de bordure), Gauche: (Pas de bordure), Droite: (Pas de bordure), Entre : (Pas de bordure)

**Page 1 : [13] Supprimé** **03/05/2024 16:41:00**

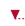

**Page 1 : [13] Supprimé** **03/05/2024 16:41:00**

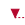

**Page 1 : [14] Supprimé** **03/05/2024 16:41:00**

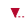

**Page 1 : [15] Mis en forme** **03/05/2024 16:41:00**

Bordure : Haut: (Pas de bordure), Bas: (Pas de bordure), Gauche: (Pas de bordure), Droite: (Pas de bordure), Entre

Bordure : Haut: (Pas de bordure), Bas: (Pas de bordure), Gauche: (Pas de bordure), Droite: (Pas de bordure), Entre : (Pas de bordure)

**Page 1 : [18] Mis en forme** **03/05/2024 16:41:00**

Police :Roboto, 9 pt, Couleur de police : Couleur personnalisée(RVB(31;31;31))

**Page 1 : [19] Mis en forme** **03/05/2024 16:41:00**

Police :Roboto, 9 pt, Couleur de police : Couleur personnalisée(RVB(31;31;31))

**Page 1 : [20] Supprimé** **03/05/2024 16:41:00**

**Page 2 : [21] Mis en forme** **03/05/2024 16:41:00**

Couleur de police : Couleur personnalisée(RVB(31;31;31))

**Page 2 : [22] Supprimé** **03/05/2024 16:41:00**

**Page 2 : [23] Mis en forme** **03/05/2024 16:41:00**

Gauche, Retrait : Gauche : 0,04 cm, Droite : 1,32 cm, Autoriser lignes veuves et orphelines, Bordure : Haut: (Pas de bordure), Bas: (Pas de bordure), Gauche: (Pas de bordure), Droite: (Pas de bordure), Entre : (Pas de bordure)

**Page 2 : [24] Mis en forme** **03/05/2024 16:41:00**

Couleur de police : Couleur personnalisée(RVB(31;31;31))

**Page 2 : [25] Supprimé** **03/05/2024 16:41:00**

**Page 2 : [26] Mis en forme** **03/05/2024 16:41:00**

Couleur de police : Couleur personnalisée(RVB(31;31;31))

**Page 2 : [26] Mis en forme** **03/05/2024 16:41:00**

Couleur de police : Couleur personnalisée(RVB(31;31;31))

**Page 2 : [27] Supprimé** **03/05/2024 16:41:00**

**Page 2 : [28] Mis en forme** **03/05/2024 16:41:00**

Bordure : Haut: (Pas de bordure), Bas: (Pas de bordure), Gauche: (Pas de bordure), Droite: (Pas de bordure), Entre : (Pas de bordure)

**Page 2 : [29] Supprimé** **03/05/2024 16:41:00**

**Page 2 : [30] Supprimé** **03/05/2024 16:41:00**

**Page 2 : [31] Mis en forme** **03/05/2024 16:41:00**

Exposant

**Page 2 : [34] Mis en forme** **03/05/2024 16:41:00**

Retrait : Gauche : 0 cm, Droite : 1,32 cm, Bordure : Haut: (Pas de bordure), Bas: (Pas de bordure), Gauche: (Pas de bordure), Droite: (Pas de bordure), Entre : (Pas de bordure)

**Page 2 : [35] Mis en forme** **03/05/2024 16:41:00**

Couleur de police : Couleur personnalisée(RVB(31;31;31))

**Page 2 : [36] Mis en forme** **03/05/2024 16:41:00**

Retrait : Gauche : 0 cm, Bordure : Haut: (Pas de bordure), Bas: (Pas de bordure), Gauche: (Pas de bordure), Droite: (Pas de bordure), Entre : (Pas de bordure)

**Page 2 : [37] Mis en forme** **03/05/2024 16:41:00**

Couleur de police : Couleur personnalisée(RVB(31;31;31))

**Page 2 : [38] Mis en forme** **03/05/2024 16:41:00**

Couleur de police : Couleur personnalisée(RVB(31;31;31))

**Page 2 : [39] Mis en forme** **03/05/2024 16:41:00**

Couleur de police : Couleur personnalisée(RVB(31;31;31))

**Page 2 : [40] Mis en forme** **03/05/2024 16:41:00**

Bordure : Haut: (Pas de bordure), Bas: (Pas de bordure), Gauche: (Pas de bordure), Droite: (Pas de bordure), Entre : (Pas de bordure)

**Page 2 : [41] Supprimé** **03/05/2024 16:41:00**

▼

**Page 2 : [42] Supprimé** **03/05/2024 16:41:00**

▼

**Page 2 : [42] Supprimé** **03/05/2024 16:41:00**

▼

**Page 2 : [43] Supprimé** **03/05/2024 16:41:00**

▼

**Page 2 : [44] Mis en forme** **03/05/2024 16:41:00**

Bordure : Haut: (Pas de bordure), Bas: (Pas de bordure), Gauche: (Pas de bordure), Droite: (Pas de bordure), Entre : (Pas de bordure)

**Page 2 : [45] Supprimé** **03/05/2024 16:41:00**

▼

**Page 2 : [45] Supprimé** **03/05/2024 16:41:00**

▼

**Page 2 : [45] Supprimé** **03/05/2024 16:41:00**

▼

▼  
**Page 2 : [47] Mis en forme** **03/05/2024 16:41:00**

Bordure : Haut: (Pas de bordure), Bas: (Pas de bordure), Gauche: (Pas de bordure), Droite: (Pas de bordure), Entre : (Pas de bordure)

**Page 2 : [48] Supprimé** **03/05/2024 16:41:00**

▼  
**Page 2 : [48] Supprimé** **03/05/2024 16:41:00**

▼  
**Page 2 : [49] Mis en forme** **03/05/2024 16:41:00**

Couleur de police : Couleur personnalisée(RVB(31;31;31))

**Page 3 : [50] Supprimé** **03/05/2024 16:41:00**

▼  
**Page 3 : [51] Mis en forme** **03/05/2024 16:41:00**

Bordure : Haut: (Pas de bordure), Bas: (Pas de bordure), Gauche: (Pas de bordure), Droite: (Pas de bordure), Entre : (Pas de bordure)

**Page 3 : [52] Mis en forme** **03/05/2024 16:41:00**

Police :10 pt

**Page 3 : [52] Mis en forme** **03/05/2024 16:41:00**

Police :10 pt

**Page 3 : [53] Mis en forme** **03/05/2024 16:41:00**

Police :10 pt

**Page 3 : [54] Mis en forme** **03/05/2024 16:41:00**

Police :10 pt

**Page 3 : [54] Mis en forme** **03/05/2024 16:41:00**

Police :10 pt

**Page 3 : [55] Supprimé** **03/05/2024 16:41:00**

▼  
**Page 3 : [56] Mis en forme** **03/05/2024 16:41:00**

Couleur de police : Couleur personnalisée(RVB(31;31;31))

**Page 3 : [57] Supprimé** **03/05/2024 16:41:00**

▼  
**Page 3 : [58] Mis en forme** **03/05/2024 16:41:00**

Anglais (G.B.)

**Page 3 : [59] Mis en forme** **03/05/2024 16:41:00**

▼.....  
**Page 3 : [61] Supprimé** **03/05/2024 16:41:00**

▼.....  
**Page 3 : [61] Supprimé** **03/05/2024 16:41:00**

▼.....  
**Page 3 : [62] Mis en forme** **03/05/2024 16:41:00**  
Couleur de police : Couleur personnalisée(RVB(31;31;31))

**Page 3 : [63] Mis en forme** **03/05/2024 16:41:00**  
Espace Avant : 2 pt, Autoriser lignes veuves et orphelines, Bordure : Haut: (Pas de bordure), Bas: (Pas de bordure),  
Gauche: (Pas de bordure), Droite: (Pas de bordure), Entre : (Pas de bordure)

**Page 3 : [64] Mis en forme** **03/05/2024 16:41:00**  
Couleur de police : Couleur personnalisée(RVB(31;31;31))

**Page 3 : [65] Mis en forme** **03/05/2024 16:41:00**  
Couleur de police : Couleur personnalisée(RVB(31;31;31))

**Page 3 : [66] Supprimé** **03/05/2024 16:41:00**

▼.....  
**Page 3 : [66] Supprimé** **03/05/2024 16:41:00**

▼.....  
**Page 3 : [66] Supprimé** **03/05/2024 16:41:00**

▼.....  
**Page 3 : [67] Mis en forme** **03/05/2024 16:41:00**  
Police :Roboto, 9 pt, Gras, Couleur de police : Couleur personnalisée(RVB(31;31;31))

**Page 3 : [68] Mis en forme** **03/05/2024 16:41:00**  
Droite : 1,42 cm, Bordure : Haut: (Pas de bordure), Bas: (Pas de bordure), Gauche: (Pas de bordure), Droite: (Pas  
de bordure), Entre : (Pas de bordure)

**Page 3 : [69] Mis en forme** **03/05/2024 16:41:00**  
Anglais (G.B.)

**Page 3 : [70] Supprimé** **03/05/2024 16:41:00**

▼.....  
**Page 3 : [70] Supprimé** **03/05/2024 16:41:00**

▼.....  
**Page 3 : [71] Supprimé** **03/05/2024 16:41:00**

▼.....  
**Page 3 : [71] Supprimé** **03/05/2024 16:41:00**



▼  
**Page 3 : [73] Supprimé**

**03/05/2024 16:41:00**

▼  
**Page 3 : [73] Supprimé**

**03/05/2024 16:41:00**

▼  
**Page 3 : [74] Supprimé**

**03/05/2024 16:41:00**

▼  
**Page 3 : [74] Supprimé**

**03/05/2024 16:41:00**

▼  
**Page 3 : [74] Supprimé**

**03/05/2024 16:41:00**

▼  
**Page 3 : [75] Supprimé**

**03/05/2024 16:41:00**

▼  
**Page 3 : [75] Supprimé**

**03/05/2024 16:41:00**

▼  
**Page 4 : [76] Supprimé**

**03/05/2024 16:41:00**

Page 4 : [77] Supprimé

03/05/2024 16:41:00

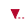

Page 4 : [77] Supprimé

03/05/2024 16:41:00

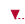

Page 4 : [78] Supprimé

03/05/2024 16:41:00

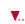

Page 4 : [78] Supprimé

03/05/2024 16:41:00

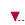

Page 4 : [78] Supprimé

03/05/2024 16:41:00

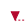

Page 4 : [78] Supprimé

03/05/2024 16:41:00

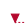

Page 4 : [78] Supprimé

03/05/2024 16:41:00

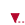

Page 4 : [78] Supprimé

03/05/2024 16:41:00

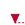

Page 4 : [78] Supprimé

03/05/2024 16:41:00

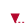

Page 4 : [78] Supprimé

03/05/2024 16:41:00

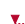

Page 4 : [78] Supprimé

03/05/2024 16:41:00

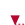

Page 4 : [78] Supprimé

03/05/2024 16:41:00

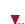

Page 4 : [79] Supprimé

03/05/2024 16:41:00

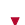

Page 4 : [79] Supprimé

03/05/2024 16:41:00

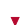

Page 4 : [79] Supprimé

03/05/2024 16:41:00

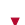

Page 4 : [79] Supprimé

03/05/2024 16:41:00

▼.....  
**Page 4 : [80] Supprimé** **03/05/2024 16:41:00**

▼.....  
**Page 4 : [81] Supprimé** **03/05/2024 16:41:00**

▼.....  
**Page 4 : [81] Supprimé** **03/05/2024 16:41:00**

▼.....  
**Page 4 : [82] Supprimé** **03/05/2024 16:41:00**

▼.....  
**Page 5 : [83] Supprimé** **03/05/2024 16:41:00**

▼.....  
**Page 9 : [84] Supprimé** **03/05/2024 16:41:00**

▼.....  
**Page 10 : [85] Supprimé** **03/05/2024 16:41:00**

▼.....  
**Page 10 : [86] Supprimé** **03/05/2024 16:41:00**

▼.....  
**Page 14 : [87] Supprimé** **03/05/2024 16:41:00**

▼.....  
**Page 14 : [88] Mis en forme** **03/05/2024 16:41:00**

Normal, Espace Avant : 12 pt, Après : 12 pt, Paragraphes solidaires, Bordure : Haut: (Pas de bordure), Bas: (Pas de bordure), Gauche: (Pas de bordure), Droite: (Pas de bordure), Entre : (Pas de bordure)

**Page 14 : [89] Mis en forme** **03/05/2024 16:41:00**

▼

|                         |                     |
|-------------------------|---------------------|
| Page 25 : [92] Supprimé | 03/05/2024 16:41:00 |
|-------------------------|---------------------|

▼

|                         |                     |
|-------------------------|---------------------|
| Page 27 : [93] Supprimé | 03/05/2024 16:41:00 |
|-------------------------|---------------------|

▼

|                         |                     |
|-------------------------|---------------------|
| Page 34 : [94] Supprimé | 03/05/2024 16:41:00 |
|-------------------------|---------------------|

▼

|                             |                     |
|-----------------------------|---------------------|
| Page 37 : [95] Mis en forme | 03/05/2024 16:41:00 |
|-----------------------------|---------------------|

Normal, Espace Avant : 12 pt, Après : 12 pt, Paragraphes solidaires, Bordure : Haut: (Pas de bordure), Bas: (Pas de bordure), Gauche: (Pas de bordure), Droite: (Pas de bordure), Entre : (Pas de bordure)

|                         |                     |
|-------------------------|---------------------|
| Page 37 : [96] Supprimé | 03/05/2024 16:41:00 |
|-------------------------|---------------------|

▼

|                         |                     |
|-------------------------|---------------------|
| Page 37 : [97] Supprimé | 03/05/2024 16:41:00 |
|-------------------------|---------------------|

▼

|                         |                     |
|-------------------------|---------------------|
| Page 37 : [98] Supprimé | 03/05/2024 16:41:00 |
|-------------------------|---------------------|

▼

|                         |                     |
|-------------------------|---------------------|
| Page 41 : [99] Supprimé | 03/05/2024 16:41:00 |
|-------------------------|---------------------|

▼

|                          |                     |
|--------------------------|---------------------|
| Page 41 : [100] Supprimé | 03/05/2024 16:41:00 |
|--------------------------|---------------------|

▼

|                          |                     |
|--------------------------|---------------------|
| Page 42 : [101] Supprimé | 03/05/2024 16:41:00 |
|--------------------------|---------------------|

▼

|                          |                     |
|--------------------------|---------------------|
| Page 44 : [102] Supprimé | 03/05/2024 16:41:00 |
|--------------------------|---------------------|

▼

|                          |                     |
|--------------------------|---------------------|
| Page 47 : [103] Supprimé | 03/05/2024 16:41:00 |
|--------------------------|---------------------|

▼

|                          |                     |
|--------------------------|---------------------|
| Page 48 : [104] Supprimé | 03/05/2024 16:41:00 |
|--------------------------|---------------------|

▼

|                          |                     |
|--------------------------|---------------------|
| Page 51 : [105] Supprimé | 03/05/2024 16:41:00 |
|--------------------------|---------------------|

▼

|                              |                     |
|------------------------------|---------------------|
| Page 53 : [106] Mis en forme | 03/05/2024 16:41:00 |
|------------------------------|---------------------|

Normal, Espace Avant : 12 pt, Après : 12 pt, Paragraphes solidaires, Bordure : Haut: (Pas de bordure), Bas: (Pas de bordure), Gauche: (Pas de bordure), Droite: (Pas de bordure), Entre : (Pas de bordure)

|                          |                     |
|--------------------------|---------------------|
| Page 53 : [107] Supprimé | 03/05/2024 16:41:00 |
|--------------------------|---------------------|

▼

|                          |                     |
|--------------------------|---------------------|
| Page 53 : [108] Supprimé | 03/05/2024 16:41:00 |
|--------------------------|---------------------|

▼

|                          |                     |
|--------------------------|---------------------|
| Page 58 : [109] Supprimé | 03/05/2024 16:41:00 |
|--------------------------|---------------------|

▼

|                          |                     |
|--------------------------|---------------------|
| Page 58 : [110] Supprimé | 03/05/2024 16:41:00 |
|--------------------------|---------------------|

**Page 64 : [113] Mis en forme** **03/05/2024 16:41:00**

Normal, Retrait : Gauche : 0,63 cm, Hiérarchisation + Niveau : 1 + Style de numérotation : Puce + Alignement : 0 cm + Retrait : 0,63 cm, Bordure : Haut: (Pas de bordure), Bas: (Pas de bordure), Gauche: (Pas de bordure), Droite: (Pas de bordure), Entre

**Page 64 : [114] Supprimé** **03/05/2024 16:41:00**

**Page 65 : [115] Supprimé** **03/05/2024 16:41:00**

**Page 65 : [116] Supprimé** **03/05/2024 16:41:00**

**Page 66 : [117] Supprimé** **03/05/2024 16:41:00**

**Page 67 : [118] Supprimé** **03/05/2024 16:41:00**

**Page 67 : [119] Mis en forme** **03/05/2024 16:41:00**

Normal, Espace Avant : 24 pt, Après : 12 pt, Paragraphes solidaires, Bordure : Haut: (Pas de bordure), Bas: (Pas de bordure), Gauche: (Pas de bordure), Droite: (Pas de bordure), Entre : (Pas de bordure)

**Page 68 : [120] Supprimé** **03/05/2024 16:41:00**

**Page 71 : [121] Supprimé** **03/05/2024 16:41:00**

**Page 123 : [122] Supprimé** **03/05/2024 16:41:00**

**Page 123 : [123] Supprimé** **03/05/2024 16:41:00**

**Page 123 : [124] Supprimé** **03/05/2024 16:41:00**

**Page 124 : [125] Supprimé** **03/05/2024 16:41:00**

**Page 126 : [126] Supprimé** **03/05/2024 16:41:00**

**Page 126 : [126] Supprimé** **03/05/2024 16:41:00**

**Page 126 : [126] Supprimé** **03/05/2024 16:41:00**

**Page 126 : [128] Mis en forme** **03/05/2024 16:41:00**

Police :12 pt

**Page 126 : [129] Tableau mis en forme** **03/05/2024 16:41:00**

Tableau mis en forme

**Page 126 : [130] Mis en forme** **03/05/2024 16:41:00**

Droite, Bordure : Haut: (Pas de bordure), Bas: (Pas de bordure), Gauche: (Pas de bordure), Droite: (Pas de bordure), Entre : (Pas de bordure)

**Page 126 : [131] Supprimé** **03/05/2024 16:41:00**

**Page 126 : [132] Mis en forme** **03/05/2024 16:41:00**

Bordure : Haut: (Pas de bordure), Bas: (Pas de bordure), Gauche: (Pas de bordure), Droite: (Pas de bordure), Entre : (Pas de bordure)

**Page 126 : [133] Mis en forme** **03/05/2024 16:41:00**

Police :Non Gras

**Page 126 : [134] Supprimé** **03/05/2024 16:41:00**

**Page 126 : [135] Mis en forme** **03/05/2024 16:41:00**

Police :Non Gras

**Page 126 : [136] Mis en forme** **03/05/2024 16:41:00**

Bordure : Haut: (Pas de bordure), Bas: (Pas de bordure), Gauche: (Pas de bordure), Droite: (Pas de bordure), Entre : (Pas de bordure)

**Page 126 : [137] Supprimé** **03/05/2024 16:41:00**

**Page 126 : [138] Mis en forme** **03/05/2024 16:41:00**

Police :Non Gras

**Page 126 : [139] Mis en forme** **03/05/2024 16:41:00**

Bordure : Haut: (Pas de bordure), Bas: (Pas de bordure), Gauche: (Pas de bordure), Droite: (Pas de bordure), Entre : (Pas de bordure)

**Page 126 : [140] Mis en forme** **03/05/2024 16:41:00**

Police :Non Gras

**Page 126 : [141] Mis en forme** **03/05/2024 16:41:00**

Bordure : Haut: (Pas de bordure), Bas: (Pas de bordure), Gauche: (Pas de bordure), Droite: (Pas de bordure), Entre : (Pas de bordure), Taquets de tabulation : Pas à 8,75 cm

Bordure : Haut: (Pas de bordure), Bas: (Pas de bordure), Gauche: (Pas de bordure), Droite: (Pas de bordure), Entre : (Pas de bordure)

**Page 126 : [144] Mis en forme** **03/05/2024 16:41:00**

Police :Non Gras

**Page 126 : [145] Supprimé** **03/05/2024 16:41:00**

▼

**Page 126 : [146] Mis en forme** **03/05/2024 16:41:00**

Police :Non Gras

**Page 126 : [147] Mis en forme** **03/05/2024 16:41:00**

Bordure : Haut: (Pas de bordure), Bas: (Pas de bordure), Gauche: (Pas de bordure), Droite: (Pas de bordure), Entre : (Pas de bordure)

**Page 126 : [148] Supprimé** **03/05/2024 16:41:00**

▼

**Page 126 : [149] Mis en forme** **03/05/2024 16:41:00**

Bordure : Haut: (Pas de bordure), Bas: (Pas de bordure), Gauche: (Pas de bordure), Droite: (Pas de bordure), Entre : (Pas de bordure)

**Page 126 : [150] Mis en forme** **03/05/2024 16:41:00**

Police :Non Gras

**Page 126 : [151] Supprimé** **03/05/2024 16:41:00**

▼

**Page 126 : [152] Mis en forme** **03/05/2024 16:41:00**

Police :Non Gras

**Page 126 : [153] Mis en forme** **03/05/2024 16:41:00**

Bordure : Haut: (Pas de bordure), Bas: (Pas de bordure), Gauche: (Pas de bordure), Droite: (Pas de bordure), Entre : (Pas de bordure)

**Page 126 : [154] Mis en forme** **03/05/2024 16:41:00**

Police :9 pt

**Page 126 : [155] Supprimé** **03/05/2024 16:41:00**

▼

**Page 126 : [156] Mis en forme** **03/05/2024 16:41:00**

Bordure : Haut: (Pas de bordure), Bas: (Pas de bordure), Gauche: (Pas de bordure), Droite: (Pas de bordure), Entre : (Pas de bordure)

**Page 126 : [157] Mis en forme** **03/05/2024 16:41:00**

Page 126 : [159] Supprimé03/05/2024 16:41:00

Page 126 : [160] Mis en forme03/05/2024 16:41:00

Police :Non Gras

Page 126 : [161] Supprimé03/05/2024 16:41:00

Page 126 : [162] Mis en forme03/05/2024 16:41:00

Police :Non Gras

Page 126 : [163] Supprimé03/05/2024 16:41:00

Page 126 : [164] Mis en forme03/05/2024 16:41:00

Bordure : Haut: (Pas de bordure), Bas: (Pas de bordure), Gauche: (Pas de bordure), Droite: (Pas de bordure), Entre : (Pas de bordure)

Page 126 : [165] Supprimé03/05/2024 16:41:00

Page 126 : [166] Mis en forme03/05/2024 16:41:00

Bordure : Haut: (Pas de bordure), Bas: (Pas de bordure), Gauche: (Pas de bordure), Droite: (Pas de bordure), Entre : (Pas de bordure)

Page 126 : [167] Supprimé03/05/2024 16:41:00

Page 126 : [168] Mis en forme03/05/2024 16:41:00

Bordure : Haut: (Pas de bordure), Bas: (Pas de bordure), Gauche: (Pas de bordure), Droite: (Pas de bordure), Entre : (Pas de bordure)

Page 126 : [169] Supprimé03/05/2024 16:41:00

Page 126 : [170] Mis en forme03/05/2024 16:41:00

Bordure : Haut: (Pas de bordure), Bas: (Pas de bordure), Gauche: (Pas de bordure), Droite: (Pas de bordure), Entre : (Pas de bordure)

Page 126 : [171] Supprimé03/05/2024 16:41:00

|                           |            |            |  |  |  |  |  |  |
|---------------------------|------------|------------|--|--|--|--|--|--|
| Land sources              | 50 [17-72] | 51 [18-73] |  |  |  |  |  |  |
| Geological (onshore)      | 38 [13-53] | 38 [13-53] |  |  |  |  |  |  |
| Wild animals              | 2 [1-3]    | 2 [1-3]    |  |  |  |  |  |  |
| Termites                  | 9 [3-15]   | 10 [4-16]  |  |  |  |  |  |  |
| Wildfires                 | (**)       | (**)       |  |  |  |  |  |  |
| Permafrost soils (direct) | 1 [0-1]    | 1 [0-1]    |  |  |  |  |  |  |
| Vegetation                | (*)        | (*)        |  |  |  |  |  |  |



Police :Gras

**Page 126 : [174] Supprimé** **03/05/2024 16:41:00**

**Page 126 : [175] Mis en forme** **03/05/2024 16:41:00**

Bordure : Haut: (Pas de bordure), Bas: (Pas de bordure), Gauche: (Pas de bordure), Droite: (Pas de bordure), Entre : (Pas de bordure)

**Page 126 : [176] Mis en forme** **03/05/2024 16:41:00**

Bordure : Haut: (Pas de bordure), Bas: (Pas de bordure), Gauche: (Pas de bordure), Droite: (Pas de bordure), Entre : (Pas de bordure)

**Page 126 : [177] Mis en forme** **03/05/2024 16:41:00**

Police :Gras

**Page 126 : [178] Supprimé** **03/05/2024 16:41:00**

**Page 126 : [179] Mis en forme** **03/05/2024 16:41:00**

Police :Gras

**Page 126 : [180] Mis en forme** **03/05/2024 16:41:00**

Gauche

**Page 126 : [181] Mis en forme** **03/05/2024 16:41:00**

Bordure : Haut: (Pas de bordure), Bas: (Pas de bordure), Gauche: (Pas de bordure), Droite: (Pas de bordure), Entre : (Pas de bordure)

**Page 126 : [182] Mis en forme** **03/05/2024 16:41:00**

Police :8 pt, Non Gras

**Page 126 : [183] Mis en forme** **03/05/2024 16:41:00**

Bordure : Haut: (Pas de bordure), Bas: (Pas de bordure), Gauche: (Pas de bordure), Droite: (Pas de bordure), Entre : (Pas de bordure)

**Page 126 : [184] Supprimé** **03/05/2024 16:41:00**

**Page 126 : [185] Mis en forme** **03/05/2024 16:41:00**

Police :Gras

**Page 126 : [186] Mis en forme** **03/05/2024 16:41:00**

Bordure : Haut: (Pas de bordure), Bas: (Pas de bordure), Gauche: (Pas de bordure), Droite: (Pas de bordure), Entre : (Pas de bordure)

Police :Gras

**Page 126 : [190] Mis en forme** **03/05/2024 16:41:00**

Bordure : Haut: (Pas de bordure), Bas: (Pas de bordure), Gauche: (Pas de bordure), Droite: (Pas de bordure), Entre : (Pas de bordure)

**Page 126 : [191] Supprimé** **03/05/2024 16:41:00**

**Page 126 : [192] Mis en forme** **03/05/2024 16:41:00**

Police :Gras

**Page 126 : [193] Mis en forme** **03/05/2024 16:41:00**

Gauche

**Page 126 : [194] Mis en forme** **03/05/2024 16:41:00**

Bordure : Haut: (Pas de bordure), Bas: (Pas de bordure), Gauche: (Pas de bordure), Droite: (Pas de bordure), Entre : (Pas de bordure)

**Page 126 : [195] Supprimé** **03/05/2024 16:41:00**

**Page 126 : [196] Mis en forme** **03/05/2024 16:41:00**

Police :Gras

**Page 126 : [197] Supprimé** **03/05/2024 16:41:00**

**Page 126 : [198] Mis en forme** **03/05/2024 16:41:00**

Police :Gras

**Page 126 : [199] Mis en forme** **03/05/2024 16:41:00**

Bordure : Haut: (Pas de bordure), Bas: (Pas de bordure), Gauche: (Pas de bordure), Droite: (Pas de bordure), Entre : (Pas de bordure)

**Page 126 : [200] Supprimé** **03/05/2024 16:41:00**

**Page 126 : [201] Mis en forme** **03/05/2024 16:41:00**

Interligne : Multiple 1,15 li, Autoriser lignes veuves et orphelines, Bordure : Haut: (Pas de bordure), Bas: (Pas de bordure), Gauche: (Pas de bordure), Droite: (Pas de bordure), Entre : (Pas de bordure)

**Page 126 : [202] Supprimé** **03/05/2024 16:41:00**

**Page 126 : [203] Supprimé** **03/05/2024 16:41:00**

|                               |                     |
|-------------------------------|---------------------|
| Page 126 : [206] Mis en forme | 03/05/2024 16:41:00 |
|-------------------------------|---------------------|

Police :Non Gras

|                                       |                     |
|---------------------------------------|---------------------|
| Page 126 : [207] Tableau mis en forme | 03/05/2024 16:41:00 |
|---------------------------------------|---------------------|

Tableau mis en forme

|                               |                     |
|-------------------------------|---------------------|
| Page 126 : [208] Mis en forme | 03/05/2024 16:41:00 |
|-------------------------------|---------------------|

Bordure : Haut: (Pas de bordure), Bas: (Pas de bordure), Gauche: (Pas de bordure), Droite: (Pas de bordure), Entre : (Pas de bordure)

|                           |                     |
|---------------------------|---------------------|
| Page 126 : [209] Supprimé | 03/05/2024 16:41:00 |
|---------------------------|---------------------|

▼

|                               |                     |
|-------------------------------|---------------------|
| Page 126 : [210] Mis en forme | 03/05/2024 16:41:00 |
|-------------------------------|---------------------|

Police :Non Gras

|                           |                     |
|---------------------------|---------------------|
| Page 126 : [211] Supprimé | 03/05/2024 16:41:00 |
|---------------------------|---------------------|

▼

|                               |                     |
|-------------------------------|---------------------|
| Page 126 : [212] Mis en forme | 03/05/2024 16:41:00 |
|-------------------------------|---------------------|

Bordure : Haut: (Pas de bordure), Bas: (Pas de bordure), Gauche: (Pas de bordure), Droite: (Pas de bordure), Entre : (Pas de bordure)

|                               |                     |
|-------------------------------|---------------------|
| Page 126 : [213] Mis en forme | 03/05/2024 16:41:00 |
|-------------------------------|---------------------|

Police :Non Gras

|                               |                     |
|-------------------------------|---------------------|
| Page 126 : [214] Mis en forme | 03/05/2024 16:41:00 |
|-------------------------------|---------------------|

Bordure : Haut: (Pas de bordure), Bas: (Pas de bordure), Gauche: (Pas de bordure), Droite: (Pas de bordure), Entre : (Pas de bordure)

|                           |                     |
|---------------------------|---------------------|
| Page 126 : [215] Supprimé | 03/05/2024 16:41:00 |
|---------------------------|---------------------|

▼

|                               |                     |
|-------------------------------|---------------------|
| Page 126 : [216] Mis en forme | 03/05/2024 16:41:00 |
|-------------------------------|---------------------|

Bordure : Haut: (Pas de bordure), Bas: (Pas de bordure), Gauche: (Pas de bordure), Droite: (Pas de bordure), Entre : (Pas de bordure)

|                           |                     |
|---------------------------|---------------------|
| Page 126 : [217] Supprimé | 03/05/2024 16:41:00 |
|---------------------------|---------------------|

▼

|                               |                     |
|-------------------------------|---------------------|
| Page 126 : [218] Mis en forme | 03/05/2024 16:41:00 |
|-------------------------------|---------------------|

Bordure : Haut: (Pas de bordure), Bas: (Pas de bordure), Gauche: (Pas de bordure), Droite: (Pas de bordure), Entre : (Pas de bordure)

|                           |                     |
|---------------------------|---------------------|
| Page 126 : [219] Supprimé | 03/05/2024 16:41:00 |
|---------------------------|---------------------|

▼

**Page 126 : [222] Mis en forme** **03/05/2024 16:41:00**

Bordure : Haut: (Pas de bordure), Bas: (Pas de bordure), Gauche: (Pas de bordure), Droite: (Pas de bordure), Entre : (Pas de bordure)

**Page 126 : [223] Supprimé** **03/05/2024 16:41:00**

**Page 126 : [224] Mis en forme** **03/05/2024 16:41:00**

Bordure : Haut: (Pas de bordure), Bas: (Pas de bordure), Gauche: (Pas de bordure), Droite: (Pas de bordure), Entre : (Pas de bordure)

**Page 126 : [225] Supprimé** **03/05/2024 16:41:00**

**Page 126 : [226] Mis en forme** **03/05/2024 16:41:00**

Bordure : Haut: (Pas de bordure), Bas: (Pas de bordure), Gauche: (Pas de bordure), Droite: (Pas de bordure), Entre : (Pas de bordure)

**Page 126 : [227] Supprimé** **03/05/2024 16:41:00**

**Page 126 : [227] Supprimé** **03/05/2024 16:41:00**

**Page 126 : [228] Mis en forme** **03/05/2024 16:41:00**

Bordure : Haut: (Pas de bordure), Bas: (Pas de bordure), Gauche: (Pas de bordure), Droite: (Pas de bordure), Entre : (Pas de bordure)

**Page 126 : [229] Mis en forme** **03/05/2024 16:41:00**

Non Exposant/ Indice

**Page 126 : [230] Supprimé** **03/05/2024 16:41:00**

**Page 126 : [231] Mis en forme** **03/05/2024 16:41:00**

Police :8 pt

**Page 126 : [232] Supprimé** **03/05/2024 16:41:00**

**Page 126 : [233] Mis en forme** **03/05/2024 16:41:00**

Bordure : Haut: (Pas de bordure), Bas: (Pas de bordure), Gauche: (Pas de bordure), Droite: (Pas de bordure), Entre : (Pas de bordure)

**Page 126 : [234] Supprimé** **03/05/2024 16:41:00**

Bordure : Haut: (Pas de bordure), Bas: (Pas de bordure), Gauche: (Pas de bordure), Droite: (Pas de bordure), Entre : (Pas de bordure)

**Page 126 : [237] Supprimé** **03/05/2024 16:41:00**

**Page 126 : [237] Supprimé** **03/05/2024 16:41:00**

**Page 126 : [238] Supprimé** **03/05/2024 16:41:00**

**Page 126 : [239] Supprimé** **03/05/2024 16:41:00**

**Page 126 : [240] Supprimé** **03/05/2024 16:41:00**

**Page 126 : [241] Supprimé** **03/05/2024 16:41:00**

**Page 126 : [242] Supprimé** **03/05/2024 16:41:00**

**Page 127 : [243] Supprimé** **03/05/2024 16:41:00**

**Page 127 : [243] Supprimé** **03/05/2024 16:41:00**

**Page 127 : [244] Mis en forme** **03/05/2024 16:41:00**  
Non Exposant/ Indice

**Page 127 : [245] Supprimé** **03/05/2024 16:41:00**

**Page 127 : [246] Mis en forme** **03/05/2024 16:41:00**  
Bordure : Haut: (Pas de bordure), Bas: (Pas de bordure), Gauche: (Pas de bordure), Droite: (Pas de bordure), Entre : (Pas de bordure)

**Page 127 : [247] Mis en forme** **03/05/2024 16:41:00**  
Non Exposant/ Indice

**Page 127 : [248] Mis en forme** **03/05/2024 16:41:00**  
Police :Non Gras

**Page 127 : [249] Mis en forme** **03/05/2024 16:41:00**  
Bordure : Haut: (Pas de bordure), Bas: (Pas de bordure), Gauche: (Pas de bordure), Droite: (Pas de bordure), Entre : (Pas de bordure)

Bordure : Haut: (Pas de bordure), Bas: (Pas de bordure), Gauche: (Pas de bordure), Droite: (Pas de bordure), Entre : (Pas de bordure)

**Page 127 : [253] Mis en forme** **03/05/2024 16:41:00**

Bordure : Haut: (Pas de bordure), Bas: (Pas de bordure), Gauche: (Pas de bordure), Droite: (Pas de bordure), Entre : (Pas de bordure)

**Page 127 : [254] Mis en forme** **03/05/2024 16:41:00**

Bordure : Haut: (Pas de bordure), Bas: (Pas de bordure), Gauche: (Pas de bordure), Droite: (Pas de bordure), Entre : (Pas de bordure)

**Page 127 : [255] Mis en forme** **03/05/2024 16:41:00**

Police :Non Gras

**Page 127 : [256] Mis en forme** **03/05/2024 16:41:00**

Bordure : Haut: (Pas de bordure), Bas: (Pas de bordure), Gauche: (Pas de bordure), Droite: (Pas de bordure), Entre : (Pas de bordure)

**Page 127 : [257] Supprimé** **03/05/2024 16:41:00**

▼

**Page 127 : [257] Supprimé** **03/05/2024 16:41:00**

▼

**Page 127 : [258] Mis en forme** **03/05/2024 16:41:00**

Police :Non Gras

**Page 127 : [259] Mis en forme** **03/05/2024 16:41:00**

Bordure : Haut: (Pas de bordure), Bas: (Pas de bordure), Gauche: (Pas de bordure), Droite: (Pas de bordure), Entre : (Pas de bordure)

**Page 127 : [260] Supprimé** **03/05/2024 16:41:00**

▼

**Page 127 : [261] Mis en forme** **03/05/2024 16:41:00**

Bordure : Haut: (Pas de bordure), Bas: (Pas de bordure), Gauche: (Pas de bordure), Droite: (Pas de bordure), Entre : (Pas de bordure)

**Page 127 : [262] Mis en forme** **03/05/2024 16:41:00**

Police :Non Gras

**Page 127 : [263] Mis en forme** **03/05/2024 16:41:00**

Police :Non Gras

**Page 127 : [264] Mis en forme** **03/05/2024 16:41:00**

Bordure : Haut: (Pas de bordure), Bas: (Pas de bordure), Gauche: (Pas de bordure), Droite: (Pas de bordure), Entre : (Pas de bordure)

**Page 127 : [267] Mis en forme** **03/05/2024 16:41:00**

Bordure : Haut: (Pas de bordure), Bas: (Pas de bordure), Gauche: (Pas de bordure), Droite: (Pas de bordure), Entre : (Pas de bordure)

**Page 127 : [268] Mis en forme** **03/05/2024 16:41:00**

Police :Non Gras

**Page 127 : [269] Mis en forme** **03/05/2024 16:41:00**

Bordure : Haut: (Pas de bordure), Bas: (Pas de bordure), Gauche: (Pas de bordure), Droite: (Pas de bordure), Entre : (Pas de bordure)

**Page 127 : [270] Supprimé** **03/05/2024 16:41:00**

**Page 127 : [271] Mis en forme** **03/05/2024 16:41:00**

Bordure : Haut: (Pas de bordure), Bas: (Pas de bordure), Gauche: (Pas de bordure), Droite: (Pas de bordure), Entre : (Pas de bordure)

**Page 127 : [272] Mis en forme** **03/05/2024 16:41:00**

Police :Non Gras

**Page 127 : [273] Mis en forme** **03/05/2024 16:41:00**

Bordure : Haut: (Pas de bordure), Bas: (Pas de bordure), Gauche: (Pas de bordure), Droite: (Pas de bordure), Entre : (Pas de bordure)

**Page 127 : [274] Supprimé** **03/05/2024 16:41:00**

**Page 127 : [275] Mis en forme** **03/05/2024 16:41:00**

Bordure : Haut: (Pas de bordure), Bas: (Pas de bordure), Gauche: (Pas de bordure), Droite: (Pas de bordure), Entre : (Pas de bordure)

**Page 127 : [276] Mis en forme** **03/05/2024 16:41:00**

Police :Gras

**Page 127 : [277] Supprimé** **03/05/2024 16:41:00**

**Page 127 : [278] Mis en forme** **03/05/2024 16:41:00**

Bordure : Haut: (Pas de bordure), Bas: (Pas de bordure), Gauche: (Pas de bordure), Droite: (Pas de bordure), Entre : (Pas de bordure)

**Page 127 : [279] Supprimé** **03/05/2024 16:41:00**

**Page 127 : [280] Mis en forme** **03/05/2024 16:41:00**

Police :Non Gras

**Page 127 : [283] Mis en forme** **03/05/2024 16:41:00**

Police :Non Gras

**Page 127 : [284] Supprimé** **03/05/2024 16:41:00**

▼

**Page 127 : [285] Supprimé** **03/05/2024 16:41:00**

▼

**Page 127 : [286] Mis en forme** **03/05/2024 16:41:00**

Police :Non Gras

**Page 127 : [287] Supprimé** **03/05/2024 16:41:00**

▼

**Page 127 : [288] Tableau mis en forme** **03/05/2024 16:41:00**

Tableau mis en forme

**Page 127 : [289] Mis en forme** **03/05/2024 16:41:00**

Bordure : Haut: (Pas de bordure), Bas: (Pas de bordure), Gauche: (Pas de bordure), Droite: (Pas de bordure), Entre : (Pas de bordure)

**Page 127 : [290] Supprimé** **03/05/2024 16:41:00**

▼

**Page 127 : [291] Mis en forme** **03/05/2024 16:41:00**

Bordure : Haut: (Pas de bordure), Bas: (Pas de bordure), Gauche: (Pas de bordure), Droite: (Pas de bordure), Entre : (Pas de bordure)

**Page 127 : [292] Mis en forme** **03/05/2024 16:41:00**

Bordure : Haut: (Pas de bordure), Bas: (Pas de bordure), Gauche: (Pas de bordure), Droite: (Pas de bordure), Entre : (Pas de bordure)

**Page 127 : [293] Mis en forme** **03/05/2024 16:41:00**

Bordure : Haut: (Pas de bordure), Bas: (Pas de bordure), Gauche: (Pas de bordure), Droite: (Pas de bordure), Entre : (Pas de bordure)

**Page 127 : [294] Supprimé** **03/05/2024 16:41:00**

▼

**Page 127 : [294] Supprimé** **03/05/2024 16:41:00**

▼

**Page 127 : [295] Mis en forme** **03/05/2024 16:41:00**

Bordure : Haut: (Pas de bordure), Bas: (Pas de bordure), Gauche: (Pas de bordure), Droite: (Pas de bordure), Entre : (Pas de bordure)

**Page 127 : [295] Mis en forme** **03/05/2024 16:41:00**



**Page 127 : [299] Mis en forme** **03/05/2024 16:41:00**

Bordure : Haut: (Pas de bordure), Bas: (Pas de bordure), Gauche: (Pas de bordure), Droite: (Pas de bordure), Entre : (Pas de bordure)

**Page 127 : [300] Supprimé** **03/05/2024 16:41:00**

▼ **Page 127 : [301] Mis en forme** **03/05/2024 16:41:00**

Bordure : Haut: (Pas de bordure), Bas: (Pas de bordure), Gauche: (Pas de bordure), Droite: (Pas de bordure), Entre : (Pas de bordure)

**Page 127 : [302] Supprimé** **03/05/2024 16:41:00**

▼

**Page 127 : [303] Mis en forme** **03/05/2024 16:41:00**

Police :Non Gras

**Page 127 : [304] Mis en forme** **03/05/2024 16:41:00**

Bordure : Haut: (Pas de bordure), Bas: (Pas de bordure), Gauche: (Pas de bordure), Droite: (Pas de bordure), Entre : (Pas de bordure)

**Page 127 : [305] Mis en forme** **03/05/2024 16:41:00**

Bordure : Haut: (Pas de bordure), Bas: (Pas de bordure), Gauche: (Pas de bordure), Droite: (Pas de bordure), Entre : (Pas de bordure)

**Page 127 : [306] Supprimé** **03/05/2024 16:41:00**

▼

**Page 127 : [306] Supprimé** **03/05/2024 16:41:00**

▼

**Page 127 : [307] Mis en forme** **03/05/2024 16:41:00**

Police :Non Gras

**Page 127 : [308] Mis en forme** **03/05/2024 16:41:00**

Police :Gras

**Page 127 : [309] Supprimé** **03/05/2024 16:41:00**

▼

**Page 127 : [309] Supprimé** **03/05/2024 16:41:00**

▼

**Page 127 : [310] Supprimé** **03/05/2024 16:41:00**

▼

**Page 127 : [310] Supprimé** **03/05/2024 16:41:00**

▼

**Page 127 : [311] Mis en forme** **03/05/2024 16:41:00**

Page 127 : [313] Supprimé

03/05/2024 16:41:00

Page 127 : [314] Mis en forme

03/05/2024 16:41:00

Police :Gras

Page 127 : [315] Mis en forme

03/05/2024 16:41:00

Bordure : Haut: (Pas de bordure), Bas: (Pas de bordure), Gauche: (Pas de bordure), Droite: (Pas de bordure), Entre : (Pas de bordure)

Page 127 : [316] Mis en forme

03/05/2024 16:41:00

Bordure : Haut: (Pas de bordure), Bas: (Pas de bordure), Gauche: (Pas de bordure), Droite: (Pas de bordure), Entre : (Pas de bordure)

Page 127 : [317] Supprimé

03/05/2024 16:41:00

Page 127 : [318] Supprimé

03/05/2024 16:41:00

Page 127 : [319] Mis en forme

03/05/2024 16:41:00

Bordure : Haut: (Pas de bordure), Bas: (Pas de bordure), Gauche: (Pas de bordure), Droite: (Pas de bordure), Entre : (Pas de bordure)

Page 127 : [320] Supprimé

03/05/2024 16:41:00

Page 127 : [321] Tableau mis en forme

03/05/2024 16:41:00

Tableau mis en forme

Page 127 : [322] Mis en forme

03/05/2024 16:41:00

Bordure : Haut: (Pas de bordure), Bas: (Pas de bordure), Gauche: (Pas de bordure), Droite: (Pas de bordure), Entre : (Pas de bordure)

Page 127 : [323] Supprimé

03/05/2024 16:41:00

Page 127 : [324] Mis en forme

03/05/2024 16:41:00

Police :8 pt, Gras

Page 127 : [325] Supprimé

03/05/2024 16:41:00

Page 127 : [326] Mis en forme

03/05/2024 16:41:00

Bordure : Haut: (Pas de bordure), Bas: (Pas de bordure), Gauche: (Pas de bordure), Droite: (Pas de bordure), Entre : (Pas de bordure)

**Page 127 : [330] Supprimé** **03/05/2024 16:41:00**

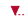

**Page 127 : [331] Mis en forme** **03/05/2024 16:41:00**

Police :Non Gras

**Page 127 : [332] Supprimé** **03/05/2024 16:41:00**

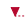

**Page 127 : [333] Supprimé** **03/05/2024 16:41:00**

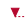

**Page 127 : [334] Mis en forme** **03/05/2024 16:41:00**

Police :Non Gras

**Page 127 : [335] Mis en forme** **03/05/2024 16:41:00**

Bordure : Haut: (Pas de bordure), Bas: (Pas de bordure), Gauche: (Pas de bordure), Droite: (Pas de bordure), Entre : (Pas de bordure)

**Page 127 : [336] Supprimé** **03/05/2024 16:41:00**

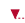

**Page 127 : [337] Mis en forme** **03/05/2024 16:41:00**

Police :Gras

**Page 127 : [338] Supprimé** **03/05/2024 16:41:00**

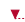

**Page 127 : [339] Mis en forme** **03/05/2024 16:41:00**

Bordure : Haut: (Pas de bordure), Bas: (Pas de bordure), Gauche: (Pas de bordure), Droite: (Pas de bordure), Entre : (Pas de bordure)

**Page 127 : [340] Supprimé** **03/05/2024 16:41:00**

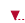

**Page 127 : [341] Mis en forme** **03/05/2024 16:41:00**

Bordure : Haut: (Pas de bordure), Bas: (Pas de bordure), Gauche: (Pas de bordure), Droite: (Pas de bordure), Entre : (Pas de bordure)

**Page 127 : [342] Mis en forme** **03/05/2024 16:41:00**

Police :8 pt, Gras

**Page 127 : [343] Supprimé** **03/05/2024 16:41:00**

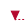

**Page 127 : [344] Supprimé** **03/05/2024 16:41:00**

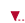

Page 127 : [347] Supprimé

03/05/2024 16:41:00

Page 127 : [348] Mis en forme

03/05/2024 16:41:00

Bordure : Haut: (Pas de bordure), Bas: (Pas de bordure), Gauche: (Pas de bordure), Droite: (Pas de bordure), Entre : (Pas de bordure)

Page 127 : [349] Mis en forme

03/05/2024 16:41:00

Couleur de police : Noir

Page 127 : [350] Mis en forme

03/05/2024 16:41:00

Bordure : Haut: (Pas de bordure), Bas: (Pas de bordure), Gauche: (Pas de bordure), Droite: (Pas de bordure), Entre : (Pas de bordure)

Page 127 : [351] Mis en forme

03/05/2024 16:41:00

Bordure : Haut: (Pas de bordure), Bas: (Pas de bordure), Gauche: (Pas de bordure), Droite: (Pas de bordure), Entre : (Pas de bordure)

Page 127 : [352] Mis en forme

03/05/2024 16:41:00

Bordure : Haut: (Pas de bordure), Bas: (Pas de bordure), Gauche: (Pas de bordure), Droite: (Pas de bordure), Entre : (Pas de bordure)

Page 127 : [353] Mis en forme

03/05/2024 16:41:00

Police :Non Gras

Page 127 : [354] Supprimé

03/05/2024 16:41:00

Page 127 : [354] Supprimé

03/05/2024 16:41:00

Page 127 : [355] Supprimé

03/05/2024 16:41:00

Page 127 : [356] Mis en forme

03/05/2024 16:41:00

Bordure : Haut: (Pas de bordure), Bas: (Pas de bordure), Gauche: (Pas de bordure), Droite: (Pas de bordure), Entre : (Pas de bordure)

Page 127 : [357] Mis en forme

03/05/2024 16:41:00

Bordure : Haut: (Pas de bordure), Bas: (Pas de bordure), Gauche: (Pas de bordure), Droite: (Pas de bordure), Entre : (Pas de bordure)

Page 127 : [358] Supprimé

03/05/2024 16:41:00

Page 127 : [358] Supprimé

03/05/2024 16:41:00

|                                      |                            |
|--------------------------------------|----------------------------|
| <b>Page 128 : [360] Mis en forme</b> | <b>03/05/2024 16:41:00</b> |
|--------------------------------------|----------------------------|

Couleur de police : Rouge

|                                  |                            |
|----------------------------------|----------------------------|
| <b>Page 128 : [361] Supprimé</b> | <b>03/05/2024 16:41:00</b> |
|----------------------------------|----------------------------|

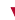

|                                      |                            |
|--------------------------------------|----------------------------|
| <b>Page 128 : [362] Mis en forme</b> | <b>03/05/2024 16:41:00</b> |
|--------------------------------------|----------------------------|

Anglais (G.B.)

|                                  |                            |
|----------------------------------|----------------------------|
| <b>Page 128 : [363] Supprimé</b> | <b>03/05/2024 16:41:00</b> |
|----------------------------------|----------------------------|

|                                      |                            |
|--------------------------------------|----------------------------|
| <b>Page 128 : [364] Mis en forme</b> | <b>03/05/2024 16:41:00</b> |
|--------------------------------------|----------------------------|

Anglais (G.B.)

|                                      |                            |
|--------------------------------------|----------------------------|
| <b>Page 128 : [365] Mis en forme</b> | <b>03/05/2024 16:41:00</b> |
|--------------------------------------|----------------------------|

Anglais (G.B.)

|                                      |                            |
|--------------------------------------|----------------------------|
| <b>Page 128 : [366] Mis en forme</b> | <b>03/05/2024 16:41:00</b> |
|--------------------------------------|----------------------------|

Anglais (G.B.)

|                                      |                            |
|--------------------------------------|----------------------------|
| <b>Page 128 : [367] Mis en forme</b> | <b>03/05/2024 16:41:00</b> |
|--------------------------------------|----------------------------|

Anglais (G.B.)

|                                      |                            |
|--------------------------------------|----------------------------|
| <b>Page 128 : [368] Mis en forme</b> | <b>03/05/2024 16:41:00</b> |
|--------------------------------------|----------------------------|

Anglais (G.B.)

|                                      |                            |
|--------------------------------------|----------------------------|
| <b>Page 128 : [369] Mis en forme</b> | <b>03/05/2024 16:41:00</b> |
|--------------------------------------|----------------------------|

Anglais (G.B.)

|                                      |                            |
|--------------------------------------|----------------------------|
| <b>Page 128 : [370] Mis en forme</b> | <b>03/05/2024 16:41:00</b> |
|--------------------------------------|----------------------------|

Anglais (G.B.)

|                                  |                            |
|----------------------------------|----------------------------|
| <b>Page 128 : [371] Supprimé</b> | <b>03/05/2024 16:41:00</b> |
|----------------------------------|----------------------------|

|                                      |                            |
|--------------------------------------|----------------------------|
| <b>Page 128 : [372] Mis en forme</b> | <b>03/05/2024 16:41:00</b> |
|--------------------------------------|----------------------------|

Anglais (G.B.)

|                                      |                            |
|--------------------------------------|----------------------------|
| <b>Page 128 : [373] Mis en forme</b> | <b>03/05/2024 16:41:00</b> |
|--------------------------------------|----------------------------|

Anglais (G.B.)

|                                      |                            |
|--------------------------------------|----------------------------|
| <b>Page 128 : [374] Mis en forme</b> | <b>03/05/2024 16:41:00</b> |
|--------------------------------------|----------------------------|

Anglais (G.B.)

|                                      |                            |
|--------------------------------------|----------------------------|
| <b>Page 128 : [375] Mis en forme</b> | <b>03/05/2024 16:41:00</b> |
|--------------------------------------|----------------------------|

Anglais (G.B.)

|                                      |                            |
|--------------------------------------|----------------------------|
| <b>Page 128 : [376] Mis en forme</b> | <b>03/05/2024 16:41:00</b> |
|--------------------------------------|----------------------------|

Anglais (G.B.)

|                                      |                            |
|--------------------------------------|----------------------------|
| <b>Page 128 : [379] Mis en forme</b> | <b>03/05/2024 16:41:00</b> |
|--------------------------------------|----------------------------|

Anglais (G.B.)

|                                      |                            |
|--------------------------------------|----------------------------|
| <b>Page 128 : [380] Mis en forme</b> | <b>03/05/2024 16:41:00</b> |
|--------------------------------------|----------------------------|

Anglais (G.B.)

|                                      |                            |
|--------------------------------------|----------------------------|
| <b>Page 128 : [381] Mis en forme</b> | <b>03/05/2024 16:41:00</b> |
|--------------------------------------|----------------------------|

Anglais (G.B.)

|                                      |                            |
|--------------------------------------|----------------------------|
| <b>Page 128 : [382] Mis en forme</b> | <b>03/05/2024 16:41:00</b> |
|--------------------------------------|----------------------------|

Anglais (G.B.), Indice

|                                      |                            |
|--------------------------------------|----------------------------|
| <b>Page 128 : [383] Mis en forme</b> | <b>03/05/2024 16:41:00</b> |
|--------------------------------------|----------------------------|

Anglais (G.B.)

|                                      |                            |
|--------------------------------------|----------------------------|
| <b>Page 128 : [383] Mis en forme</b> | <b>03/05/2024 16:41:00</b> |
|--------------------------------------|----------------------------|

Anglais (G.B.)

|                                      |                            |
|--------------------------------------|----------------------------|
| <b>Page 128 : [384] Mis en forme</b> | <b>03/05/2024 16:41:00</b> |
|--------------------------------------|----------------------------|

Anglais (G.B.)

|                                      |                            |
|--------------------------------------|----------------------------|
| <b>Page 128 : [385] Mis en forme</b> | <b>03/05/2024 16:41:00</b> |
|--------------------------------------|----------------------------|

Anglais (G.B.)

|                                      |                            |
|--------------------------------------|----------------------------|
| <b>Page 128 : [386] Mis en forme</b> | <b>03/05/2024 16:41:00</b> |
|--------------------------------------|----------------------------|

Anglais (G.B.)

|                                      |                            |
|--------------------------------------|----------------------------|
| <b>Page 128 : [387] Mis en forme</b> | <b>03/05/2024 16:41:00</b> |
|--------------------------------------|----------------------------|

Anglais (G.B.)

|                                      |                            |
|--------------------------------------|----------------------------|
| <b>Page 128 : [388] Mis en forme</b> | <b>03/05/2024 16:41:00</b> |
|--------------------------------------|----------------------------|

Anglais (G.B.)

|                                      |                            |
|--------------------------------------|----------------------------|
| <b>Page 128 : [389] Mis en forme</b> | <b>03/05/2024 16:41:00</b> |
|--------------------------------------|----------------------------|

Anglais (G.B.)

|                                      |                            |
|--------------------------------------|----------------------------|
| <b>Page 128 : [390] Mis en forme</b> | <b>03/05/2024 16:41:00</b> |
|--------------------------------------|----------------------------|

Anglais (G.B.)

|                                      |                            |
|--------------------------------------|----------------------------|
| <b>Page 128 : [391] Mis en forme</b> | <b>03/05/2024 16:41:00</b> |
|--------------------------------------|----------------------------|

Anglais (G.B.)

|                                      |                            |
|--------------------------------------|----------------------------|
| <b>Page 128 : [392] Mis en forme</b> | <b>03/05/2024 16:41:00</b> |
|--------------------------------------|----------------------------|

Anglais (G.B.)

|                                      |                            |
|--------------------------------------|----------------------------|
| <b>Page 128 : [393] Mis en forme</b> | <b>03/05/2024 16:41:00</b> |
|--------------------------------------|----------------------------|

Anglais (G.B.)

**Page 128 : [396] Mis en forme** 03/05/2024 16:41:00

Anglais (G.B.)

**Page 128 : [397] Mis en forme** 03/05/2024 16:41:00

Anglais (G.B.)

**Page 128 : [398] Mis en forme** 03/05/2024 16:41:00

Anglais (G.B.)

**Page 128 : [399] Supprimé** 03/05/2024 16:41:00

▼

**Page 128 : [400] Mis en forme** 03/05/2024 16:41:00

Anglais (G.B.)

**Page 128 : [401] Mis en forme** 03/05/2024 16:41:00

Anglais (G.B.)

**Page 128 : [402] Mis en forme** 03/05/2024 16:41:00

Anglais (G.B.)

**Page 128 : [403] Supprimé** 03/05/2024 16:41:00

▼

**Page 128 : [404] Mis en forme** 03/05/2024 16:41:00

Anglais (G.B.)

**Page 128 : [405] Mis en forme** 03/05/2024 16:41:00

Droite

**Page 128 : [406] Mis en forme** 03/05/2024 16:41:00

Anglais (G.B.)

**Page 128 : [407] Mis en forme** 03/05/2024 16:41:00

Autoriser lignes veuves et orphelines

**Page 128 : [408] Mis en forme** 03/05/2024 16:41:00

Anglais (G.B.)

**Page 128 : [409] Mis en forme** 03/05/2024 16:41:00

Anglais (G.B.)

**Page 128 : [410] Mis en forme** 03/05/2024 16:41:00

Anglais (G.B.)

|                                                                                                                                                                        |                            |
|------------------------------------------------------------------------------------------------------------------------------------------------------------------------|----------------------------|
| <b>Page 128 : [413] Mis en forme</b>                                                                                                                                   | <b>03/05/2024 16:41:00</b> |
| Anglais (G.B.)                                                                                                                                                         |                            |
| <b>Page 128 : [414] Cellules supprimées</b>                                                                                                                            | <b>03/05/2024 16:41:00</b> |
| Cellules supprimées                                                                                                                                                    |                            |
| <b>Page 128 : [415] Cellules supprimées</b>                                                                                                                            | <b>03/05/2024 16:41:00</b> |
| Cellules supprimées                                                                                                                                                    |                            |
| <b>Page 128 : [416] Cellules supprimées</b>                                                                                                                            | <b>03/05/2024 16:41:00</b> |
| Cellules supprimées                                                                                                                                                    |                            |
| <b>Page 128 : [417] Supprimé</b>                                                                                                                                       | <b>03/05/2024 16:41:00</b> |
| <b>Page 129 : [418] Mis en forme</b>                                                                                                                                   | <b>03/05/2024 16:41:00</b> |
| Anglais (G.B.)                                                                                                                                                         |                            |
| <b>Page 129 : [419] Mis en forme</b>                                                                                                                                   | <b>03/05/2024 16:41:00</b> |
| Anglais (G.B.)                                                                                                                                                         |                            |
| <b>Page 129 : [420] Supprimé</b>                                                                                                                                       | <b>03/05/2024 16:41:00</b> |
| ▼                                                                                                                                                                      |                            |
| <b>Page 129 : [420] Supprimé</b>                                                                                                                                       | <b>03/05/2024 16:41:00</b> |
| ▼                                                                                                                                                                      |                            |
| <b>Page 129 : [421] Mis en forme</b>                                                                                                                                   | <b>03/05/2024 16:41:00</b> |
| Police :9 pt                                                                                                                                                           |                            |
| <b>Page 129 : [422] Mis en forme</b>                                                                                                                                   | <b>03/05/2024 16:41:00</b> |
| Retrait : Première ligne : 0 cm, Bordure : Haut: (Pas de bordure), Bas: (Pas de bordure), Gauche: (Pas de bordure), Droite: (Pas de bordure), Entre : (Pas de bordure) |                            |
| <b>Page 129 : [423] Mis en forme</b>                                                                                                                                   | <b>03/05/2024 16:41:00</b> |
| Police :9 pt                                                                                                                                                           |                            |
| <b>Page 129 : [424] Mis en forme</b>                                                                                                                                   | <b>03/05/2024 16:41:00</b> |
| Autoriser lignes veuves et orphelines                                                                                                                                  |                            |
| <b>Page 129 : [425] Mis en forme</b>                                                                                                                                   | <b>03/05/2024 16:41:00</b> |
| Police :9 pt                                                                                                                                                           |                            |
| <b>Page 129 : [426] Mis en forme</b>                                                                                                                                   | <b>03/05/2024 16:41:00</b> |
| Police :9 pt                                                                                                                                                           |                            |
| <b>Page 129 : [427] Mis en forme</b>                                                                                                                                   | <b>03/05/2024 16:41:00</b> |



**Page 129 : [429] Mis en forme** **03/05/2024 16:41:00**

Centré, Bordure : Haut: (Pas de bordure), Bas: (Pas de bordure), Gauche: (Pas de bordure), Droite: (Pas de bordure), Entre : (Pas de bordure)

**Page 129 : [430] Cellules supprimées** **03/05/2024 16:41:00**

Cellules supprimées

**Page 129 : [431] Cellules supprimées** **03/05/2024 16:41:00**

Cellules supprimées

**Page 129 : [432] Cellules supprimées** **03/05/2024 16:41:00**

Cellules supprimées

**Page 129 : [433] Cellules supprimées** **03/05/2024 16:41:00**

Cellules supprimées

**Page 129 : [434] Cellules supprimées** **03/05/2024 16:41:00**

Cellules supprimées

**Page 129 : [435] Cellules supprimées** **03/05/2024 16:41:00**

Cellules supprimées

**Page 129 : [436] Supprimé** **03/05/2024 16:41:00**

**Page 129 : [437] Mis en forme** **03/05/2024 16:41:00**

Bordure : Haut: (Pas de bordure), Bas: (Pas de bordure), Gauche: (Pas de bordure), Droite: (Pas de bordure), Entre : (Pas de bordure)

**Page 129 : [438] Mis en forme** **03/05/2024 16:41:00**

Police :9 pt, Gras, Non Italique, Anglais (G.B.)

**Page 129 : [439] Mis en forme** **03/05/2024 16:41:00**

Police :9 pt, Non Gras, Italique

**Page 129 : [440] Mis en forme** **03/05/2024 16:41:00**

Police :9 pt, Non Gras, Italique

**Page 129 : [440] Mis en forme** **03/05/2024 16:41:00**

Police :9 pt, Non Gras, Italique

**Page 129 : [441] Supprimé** **03/05/2024 16:41:00**

**Page 129 : [442] Mis en forme** **03/05/2024 16:41:00**

Police :9 pt

**Page 129 : [444] Mis en forme** **03/05/2024 16:41:00**

Police :9 pt, Italique

**Page 129 : [445] Supprimé** **03/05/2024 16:41:00**

**Page 129 : [446] Mis en forme** **03/05/2024 16:41:00**

Police :9 pt, Non Gras, Italique

**Page 129 : [447] Supprimé** **03/05/2024 16:41:00**

**Page 129 : [448] Mis en forme** **03/05/2024 16:41:00**

Autoriser lignes veuves et orphelines

**Page 129 : [449] Mis en forme** **03/05/2024 16:41:00**

Police :9 pt, Gras

**Page 129 : [450] Supprimé** **03/05/2024 16:41:00**

**Page 129 : [451] Mis en forme** **03/05/2024 16:41:00**

Autoriser lignes veuves et orphelines, Bordure : Haut: (Pas de bordure), Bas: (Pas de bordure), Gauche: (Pas de bordure), Droite: (Pas de bordure), Entre : (Pas de bordure)

**Page 129 : [452] Mis en forme** **03/05/2024 16:41:00**

Police :9 pt, Gras

**Page 129 : [453] Supprimé** **03/05/2024 16:41:00**

**Page 129 : [454] Mis en forme** **03/05/2024 16:41:00**

Police :9 pt, Gras

**Page 129 : [454] Mis en forme** **03/05/2024 16:41:00**

Police :9 pt, Gras

**Page 129 : [455] Supprimé** **03/05/2024 16:41:00**

**Page 129 : [456] Mis en forme** **03/05/2024 16:41:00**

Police :9 pt, Gras

**Page 129 : [456] Mis en forme** **03/05/2024 16:41:00**

Police :9 pt, Gras

**Page 129 : [457] Mis en forme** **03/05/2024 16:41:00**

Police :9 pt

**Page 129 : [458] Mis en forme** **03/05/2024 16:41:00**

Centré, Bordure : Haut: (Pas de bordure), Bas: (Pas de bordure), Gauche: (Pas de bordure), Droite: (Pas de

Cellules supprimées

**Page 129 : [461] Cellules supprimées** 03/05/2024 16:41:00

Cellules supprimées

**Page 129 : [462] Cellules supprimées** 03/05/2024 16:41:00

Cellules supprimées

**Page 129 : [463] Cellules supprimées** 03/05/2024 16:41:00

Cellules supprimées

**Page 129 : [464] Cellules supprimées** 03/05/2024 16:41:00

Cellules supprimées

**Page 129 : [465] Supprimé** 03/05/2024 16:41:00

**Page 129 : [466] Mis en forme** 03/05/2024 16:41:00

Bordure : Haut: (Pas de bordure), Bas: (Pas de bordure), Gauche: (Pas de bordure), Droite: (Pas de bordure), Entre : (Pas de bordure)

**Page 129 : [467] Mis en forme** 03/05/2024 16:41:00

Police :9 pt, Gras

**Page 129 : [468] Mis en forme** 03/05/2024 16:41:00

Police :9 pt, Non Gras, Italique

**Page 129 : [469] Mis en forme** 03/05/2024 16:41:00

Police :9 pt, Italique

**Page 129 : [470] Supprimé** 03/05/2024 16:41:00

**Page 129 : [471] Mis en forme** 03/05/2024 16:41:00

Police :9 pt, Italique

**Page 129 : [472] Mis en forme** 03/05/2024 16:41:00

Police :9 pt, Non Gras, Italique

**Page 129 : [473] Mis en forme** 03/05/2024 16:41:00

Police :9 pt, Italique

**Page 129 : [474] Supprimé** 03/05/2024 16:41:00

**Page 129 : [475] Mis en forme** 03/05/2024 16:41:00

Police :9 pt, Non Gras, Italique

|                                                                                                                                               |                            |
|-----------------------------------------------------------------------------------------------------------------------------------------------|----------------------------|
| <b>Page 129 : [478] Supprimé</b>                                                                                                              | <b>03/05/2024 16:41:00</b> |
| <b>Page 129 : [479] Mis en forme</b>                                                                                                          | <b>03/05/2024 16:41:00</b> |
| Police :9 pt                                                                                                                                  |                            |
| <b>Page 129 : [479] Mis en forme</b>                                                                                                          | <b>03/05/2024 16:41:00</b> |
| Police :9 pt                                                                                                                                  |                            |
| <b>Page 129 : [480] Supprimé</b>                                                                                                              | <b>03/05/2024 16:41:00</b> |
| <b>Page 129 : [481] Mis en forme</b>                                                                                                          | <b>03/05/2024 16:41:00</b> |
| Police :9 pt, Gras                                                                                                                            |                            |
| <b>Page 129 : [481] Mis en forme</b>                                                                                                          | <b>03/05/2024 16:41:00</b> |
| Police :9 pt, Gras                                                                                                                            |                            |
| <b>Page 129 : [482] Supprimé</b>                                                                                                              | <b>03/05/2024 16:41:00</b> |
| <b>Page 129 : [483] Mis en forme</b>                                                                                                          | <b>03/05/2024 16:41:00</b> |
| Police :9 pt                                                                                                                                  |                            |
| <b>Page 129 : [484] Mis en forme</b>                                                                                                          | <b>03/05/2024 16:41:00</b> |
| Police :9 pt                                                                                                                                  |                            |
| <b>Page 129 : [485] Mis en forme</b>                                                                                                          | <b>03/05/2024 16:41:00</b> |
| Centré, Bordure : Haut: (Pas de bordure), Bas: (Pas de bordure), Gauche: (Pas de bordure), Droite: (Pas de bordure), Entre : (Pas de bordure) |                            |
| <b>Page 129 : [486] Mis en forme</b>                                                                                                          | <b>03/05/2024 16:41:00</b> |
| Police :9 pt, Non Gras, Italique                                                                                                              |                            |
| <b>Page 129 : [487] Cellules supprimées</b>                                                                                                   | <b>03/05/2024 16:41:00</b> |
| Cellules supprimées                                                                                                                           |                            |
| <b>Page 129 : [488] Cellules supprimées</b>                                                                                                   | <b>03/05/2024 16:41:00</b> |
| Cellules supprimées                                                                                                                           |                            |
| <b>Page 129 : [489] Cellules supprimées</b>                                                                                                   | <b>03/05/2024 16:41:00</b> |
| Cellules supprimées                                                                                                                           |                            |
| <b>Page 129 : [490] Cellules supprimées</b>                                                                                                   | <b>03/05/2024 16:41:00</b> |
| Cellules supprimées                                                                                                                           |                            |
| <b>Page 129 : [491] Cellules supprimées</b>                                                                                                   | <b>03/05/2024 16:41:00</b> |
| Cellules supprimées                                                                                                                           |                            |
| <b>Page 129 : [492] Cellules supprimées</b>                                                                                                   | <b>03/05/2024 16:41:00</b> |

Retrait : Première ligne : 0 cm, Bordure : Haut: (Pas de bordure), Bas: (Pas de bordure), Gauche: (Pas de bordure), Droite: (Pas de bordure), Entre : (Pas de bordure)

**Page 148 : [495] Mis en forme**

**03/05/2024 16:41:00**

Police :9 pt

**Page 130 : [496] Mis en forme**

**03/05/2024 16:41:00**

Autoriser lignes veuves et orphelines

**Page 148 : [497] Mis en forme**

**03/05/2024 16:41:00**

Police :9 pt

**Page 148 : [498] Mis en forme**

**03/05/2024 16:41:00**

Police :9 pt

**Page 148 : [499] Mis en forme**

**03/05/2024 16:41:00**

Bordure : Haut: (Pas de bordure), Bas: (Pas de bordure), Gauche: (Pas de bordure), Droite: (Pas de bordure), Entre : (Pas de bordure)

**Page 148 : [500] Mis en forme**

**03/05/2024 16:41:00**

Police :9 pt

**Page 148 : [501] Mis en forme**

**03/05/2024 16:41:00**

Centré, Bordure : Haut: (Pas de bordure), Bas: (Pas de bordure), Gauche: (Pas de bordure), Droite: (Pas de bordure), Entre : (Pas de bordure)

**Page 148 : [502] Cellules supprimées**

**03/05/2024 16:41:00**

Cellules supprimées

**Page 148 : [503] Cellules supprimées**

**03/05/2024 16:41:00**

Cellules supprimées

**Page 148 : [504] Cellules supprimées**

**03/05/2024 16:41:00**

Cellules supprimées

**Page 148 : [505] Cellules supprimées**

**03/05/2024 16:41:00**

Cellules supprimées

**Page 148 : [506] Cellules supprimées**

**03/05/2024 16:41:00**

Cellules supprimées

**Page 148 : [507] Cellules supprimées**

**03/05/2024 16:41:00**

Cellules supprimées

**Page 130 : [508] Supprimé**

**03/05/2024 16:41:00**

Police :9 pt, Gras

**Page 130 : [511] Mis en forme** 03/05/2024 16:41:00

Police :9 pt, Non Gras, Italique

**Page 130 : [511] Mis en forme** 03/05/2024 16:41:00

Police :9 pt, Non Gras, Italique

**Page 130 : [512] Mis en forme** 03/05/2024 16:41:00

Police :9 pt, Italique

**Page 130 : [513] Supprimé** 03/05/2024 16:41:00

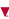

**Page 130 : [514] Mis en forme** 03/05/2024 16:41:00

Police :9 pt, Non Gras, Italique

**Page 130 : [515] Mis en forme** 03/05/2024 16:41:00

Police :9 pt, Italique

**Page 130 : [516] Mis en forme** 03/05/2024 16:41:00

Police :9 pt, Italique

**Page 130 : [517] Supprimé** 03/05/2024 16:41:00

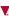

**Page 130 : [518] Mis en forme** 03/05/2024 16:41:00

Police :9 pt, Italique

**Page 130 : [519] Supprimé** 03/05/2024 16:41:00

**Page 130 : [520] Mis en forme** 03/05/2024 16:41:00

Police :10 pt, Gras

**Page 130 : [521] Supprimé** 03/05/2024 16:41:00

**Page 130 : [522] Mis en forme** 03/05/2024 16:41:00

Police :10 pt, Gras

**Page 130 : [522] Mis en forme** 03/05/2024 16:41:00

Police :10 pt, Gras

**Page 130 : [523] Supprimé** 03/05/2024 16:41:00

**Page 130 : [524] Mis en forme** 03/05/2024 16:41:00

Police :10 pt, Gras

**Page 130 : [524] Mis en forme** 03/05/2024 16:41:00

|                                      |                            |
|--------------------------------------|----------------------------|
| <b>Page 130 : [527] Mis en forme</b> | <b>03/05/2024 16:41:00</b> |
|--------------------------------------|----------------------------|

Police :9 pt

|                                      |                            |
|--------------------------------------|----------------------------|
| <b>Page 130 : [528] Mis en forme</b> | <b>03/05/2024 16:41:00</b> |
|--------------------------------------|----------------------------|

Centré, Bordure : Haut: (Pas de bordure), Bas: (Pas de bordure), Gauche: (Pas de bordure), Droite: (Pas de bordure), Entre : (Pas de bordure)

|                                      |                            |
|--------------------------------------|----------------------------|
| <b>Page 130 : [529] Mis en forme</b> | <b>03/05/2024 16:41:00</b> |
|--------------------------------------|----------------------------|

Police :9 pt, Non Gras, Italique

|                                             |                            |
|---------------------------------------------|----------------------------|
| <b>Page 130 : [530] Cellules supprimées</b> | <b>03/05/2024 16:41:00</b> |
|---------------------------------------------|----------------------------|

Cellules supprimées

|                                             |                            |
|---------------------------------------------|----------------------------|
| <b>Page 130 : [531] Cellules supprimées</b> | <b>03/05/2024 16:41:00</b> |
|---------------------------------------------|----------------------------|

Cellules supprimées

|                                             |                            |
|---------------------------------------------|----------------------------|
| <b>Page 130 : [532] Cellules supprimées</b> | <b>03/05/2024 16:41:00</b> |
|---------------------------------------------|----------------------------|

Cellules supprimées

|                                             |                            |
|---------------------------------------------|----------------------------|
| <b>Page 130 : [533] Cellules supprimées</b> | <b>03/05/2024 16:41:00</b> |
|---------------------------------------------|----------------------------|

Cellules supprimées

|                                             |                            |
|---------------------------------------------|----------------------------|
| <b>Page 130 : [534] Cellules supprimées</b> | <b>03/05/2024 16:41:00</b> |
|---------------------------------------------|----------------------------|

Cellules supprimées

|                                             |                            |
|---------------------------------------------|----------------------------|
| <b>Page 130 : [535] Cellules supprimées</b> | <b>03/05/2024 16:41:00</b> |
|---------------------------------------------|----------------------------|

Cellules supprimées

|                                      |                            |
|--------------------------------------|----------------------------|
| <b>Page 130 : [536] Mis en forme</b> | <b>03/05/2024 16:41:00</b> |
|--------------------------------------|----------------------------|

Police :9 pt

|                                      |                            |
|--------------------------------------|----------------------------|
| <b>Page 130 : [537] Mis en forme</b> | <b>03/05/2024 16:41:00</b> |
|--------------------------------------|----------------------------|

Bordure : Haut: (Pas de bordure), Bas: (Pas de bordure), Gauche: (Pas de bordure), Droite: (Pas de bordure), Entre : (Pas de bordure)

|                                  |                            |
|----------------------------------|----------------------------|
| <b>Page 130 : [538] Supprimé</b> | <b>03/05/2024 16:41:00</b> |
|----------------------------------|----------------------------|

|                                      |                            |
|--------------------------------------|----------------------------|
| <b>Page 130 : [539] Mis en forme</b> | <b>03/05/2024 16:41:00</b> |
|--------------------------------------|----------------------------|

Police :9 pt, Gras

|                                      |                            |
|--------------------------------------|----------------------------|
| <b>Page 130 : [540] Mis en forme</b> | <b>03/05/2024 16:41:00</b> |
|--------------------------------------|----------------------------|

Police :9 pt

|                                      |                            |
|--------------------------------------|----------------------------|
| <b>Page 130 : [541] Mis en forme</b> | <b>03/05/2024 16:41:00</b> |
|--------------------------------------|----------------------------|

Autoriser lignes veuves et orphelines

Page 130 : [544] Supprimé

03/05/2024 16:41:00

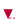

Page 130 : [545] Mis en forme

03/05/2024 16:41:00

Bordure : Haut: (Pas de bordure), Bas: (Pas de bordure), Gauche: (Pas de bordure), Droite: (Pas de bordure), Entre : (Pas de bordure)

Page 130 : [546] Mis en forme

03/05/2024 16:41:00

Police :9 pt

Page 130 : [546] Mis en forme

03/05/2024 16:41:00

Police :9 pt

Page 130 : [547] Supprimé

03/05/2024 16:41:00

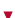

Page 130 : [548] Mis en forme

03/05/2024 16:41:00

Police :9 pt

Page 130 : [549] Supprimé

03/05/2024 16:41:00

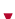

Page 130 : [550] Mis en forme

03/05/2024 16:41:00

Police :9 pt

Page 130 : [551] Supprimé

03/05/2024 16:41:00

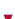

Page 130 : [552] Mis en forme

03/05/2024 16:41:00

Police :9 pt

Page 130 : [553] Supprimé

03/05/2024 16:41:00

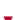

Page 130 : [554] Mis en forme

03/05/2024 16:41:00

Police :9 pt

Page 130 : [555] Supprimé

03/05/2024 16:41:00

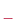

Page 130 : [556] Mis en forme

03/05/2024 16:41:00

Police :9 pt, Non Gras

Page 131 : [557] Supprimé

03/05/2024 16:41:00

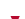

Page 131 : [557] Supprimé

03/05/2024 16:41:00



Police :10 pt

**Page 131 : [559] Tableau mis en forme**

**03/05/2024 16:41:00**

Tableau mis en forme

**Page 131 : [560] Mis en forme**

**03/05/2024 16:41:00**

Police :10 pt

**Page 131 : [561] Mis en forme**

**03/05/2024 16:41:00**

Police :10 pt

**Page 131 : [561] Mis en forme**

**03/05/2024 16:41:00**

Police :10 pt

**Page 131 : [562] Mis en forme**

**03/05/2024 16:41:00**

Police :10 pt

**Page 131 : [563] Mis en forme**

**03/05/2024 16:41:00**

Police :10 pt

**Page 131 : [564] Mis en forme**

**03/05/2024 16:41:00**

Police :10 pt

**Page 131 : [565] Mis en forme**

**03/05/2024 16:41:00**

Police :10 pt, Gras

**Page 131 : [565] Mis en forme**

**03/05/2024 16:41:00**

Police :10 pt, Gras

**Page 131 : [566] Mis en forme**

**03/05/2024 16:41:00**

Police :10 pt

**Page 131 : [567] Mis en forme**

**03/05/2024 16:41:00**

Police :10 pt

**Page 131 : [568] Mis en forme**

**03/05/2024 16:41:00**

Police :10 pt

**Page 131 : [569] Mis en forme**

**03/05/2024 16:41:00**

Police :10 pt, Non Gras

**Page 131 : [570] Mis en forme**

**03/05/2024 16:41:00**

Police :10 pt

**Page 131 : [571] Mis en forme**

**03/05/2024 16:41:00**

Police :10 pt

|                                      |                            |
|--------------------------------------|----------------------------|
| <b>Page 131 : [574] Mis en forme</b> | <b>03/05/2024 16:41:00</b> |
|--------------------------------------|----------------------------|

Police :10 pt

|                                      |                            |
|--------------------------------------|----------------------------|
| <b>Page 131 : [575] Mis en forme</b> | <b>03/05/2024 16:41:00</b> |
|--------------------------------------|----------------------------|

Police :10 pt

|                                      |                            |
|--------------------------------------|----------------------------|
| <b>Page 131 : [576] Mis en forme</b> | <b>03/05/2024 16:41:00</b> |
|--------------------------------------|----------------------------|

Police :10 pt

|                                      |                            |
|--------------------------------------|----------------------------|
| <b>Page 131 : [577] Mis en forme</b> | <b>03/05/2024 16:41:00</b> |
|--------------------------------------|----------------------------|

Police :10 pt

|                                      |                            |
|--------------------------------------|----------------------------|
| <b>Page 131 : [578] Mis en forme</b> | <b>03/05/2024 16:41:00</b> |
|--------------------------------------|----------------------------|

Police :10 pt, Non Gras

|                                      |                            |
|--------------------------------------|----------------------------|
| <b>Page 131 : [579] Mis en forme</b> | <b>03/05/2024 16:41:00</b> |
|--------------------------------------|----------------------------|

Police :8 pt

|                                      |                            |
|--------------------------------------|----------------------------|
| <b>Page 131 : [580] Mis en forme</b> | <b>03/05/2024 16:41:00</b> |
|--------------------------------------|----------------------------|

Police :10 pt

|                                      |                            |
|--------------------------------------|----------------------------|
| <b>Page 131 : [581] Mis en forme</b> | <b>03/05/2024 16:41:00</b> |
|--------------------------------------|----------------------------|

Police :10 pt

|                                      |                            |
|--------------------------------------|----------------------------|
| <b>Page 131 : [582] Mis en forme</b> | <b>03/05/2024 16:41:00</b> |
|--------------------------------------|----------------------------|

Police :10 pt

|                                      |                            |
|--------------------------------------|----------------------------|
| <b>Page 131 : [583] Mis en forme</b> | <b>03/05/2024 16:41:00</b> |
|--------------------------------------|----------------------------|

Police :10 pt

|                                      |                            |
|--------------------------------------|----------------------------|
| <b>Page 131 : [584] Mis en forme</b> | <b>03/05/2024 16:41:00</b> |
|--------------------------------------|----------------------------|

Police :10 pt

|                                      |                            |
|--------------------------------------|----------------------------|
| <b>Page 131 : [585] Mis en forme</b> | <b>03/05/2024 16:41:00</b> |
|--------------------------------------|----------------------------|

Police :10 pt

|                                      |                            |
|--------------------------------------|----------------------------|
| <b>Page 131 : [586] Mis en forme</b> | <b>03/05/2024 16:41:00</b> |
|--------------------------------------|----------------------------|

Police :10 pt

|                                      |                            |
|--------------------------------------|----------------------------|
| <b>Page 131 : [586] Mis en forme</b> | <b>03/05/2024 16:41:00</b> |
|--------------------------------------|----------------------------|

Police :10 pt

|                                      |                            |
|--------------------------------------|----------------------------|
| <b>Page 131 : [587] Mis en forme</b> | <b>03/05/2024 16:41:00</b> |
|--------------------------------------|----------------------------|

Police :10 pt

|                                      |                            |
|--------------------------------------|----------------------------|
| <b>Page 131 : [588] Mis en forme</b> | <b>03/05/2024 16:41:00</b> |
|--------------------------------------|----------------------------|

Police :10 pt, Gras

**Page 131 : [590] Mis en forme** **03/05/2024 16:41:00**

Police :10 pt, Gras

**Page 131 : [591] Mis en forme** **03/05/2024 16:41:00**

Police :10 pt

**Page 131 : [592] Mis en forme** **03/05/2024 16:41:00**

Police :10 pt

**Page 131 : [593] Mis en forme** **03/05/2024 16:41:00**

Police :10 pt, Gras

**Page 131 : [593] Mis en forme** **03/05/2024 16:41:00**

Police :10 pt, Gras

**Page 131 : [594] Mis en forme** **03/05/2024 16:41:00**

Police :10 pt, Non Gras

**Page 131 : [595] Mis en forme** **03/05/2024 16:41:00**

Police :10 pt

**Page 131 : [596] Mis en forme** **03/05/2024 16:41:00**

Police :10 pt

**Page 131 : [597] Mis en forme** **03/05/2024 16:41:00**

Police :10 pt

**Page 131 : [598] Mis en forme** **03/05/2024 16:41:00**

Police :10 pt

**Page 131 : [599] Mis en forme** **03/05/2024 16:41:00**

Police :10 pt

**Page 131 : [600] Mis en forme** **03/05/2024 16:41:00**

Police :10 pt

**Page 131 : [601] Mis en forme** **03/05/2024 16:41:00**

Police :10 pt

**Page 131 : [602] Mis en forme** **03/05/2024 16:41:00**

Police :10 pt, Non Gras

**Page 131 : [603] Mis en forme** **03/05/2024 16:41:00**

Police :10 pt

|                                      |                            |
|--------------------------------------|----------------------------|
| <b>Page 131 : [606] Mis en forme</b> | <b>03/05/2024 16:41:00</b> |
|--------------------------------------|----------------------------|

Police :10 pt

|                                      |                            |
|--------------------------------------|----------------------------|
| <b>Page 131 : [607] Mis en forme</b> | <b>03/05/2024 16:41:00</b> |
|--------------------------------------|----------------------------|

Police :10 pt

|                                      |                            |
|--------------------------------------|----------------------------|
| <b>Page 131 : [608] Mis en forme</b> | <b>03/05/2024 16:41:00</b> |
|--------------------------------------|----------------------------|

Police :10 pt

|                                      |                            |
|--------------------------------------|----------------------------|
| <b>Page 131 : [609] Mis en forme</b> | <b>03/05/2024 16:41:00</b> |
|--------------------------------------|----------------------------|

Police :10 pt

|                                      |                            |
|--------------------------------------|----------------------------|
| <b>Page 131 : [609] Mis en forme</b> | <b>03/05/2024 16:41:00</b> |
|--------------------------------------|----------------------------|

Police :10 pt

|                                      |                            |
|--------------------------------------|----------------------------|
| <b>Page 131 : [610] Mis en forme</b> | <b>03/05/2024 16:41:00</b> |
|--------------------------------------|----------------------------|

Police :10 pt, Non Gras

|                                      |                            |
|--------------------------------------|----------------------------|
| <b>Page 131 : [611] Mis en forme</b> | <b>03/05/2024 16:41:00</b> |
|--------------------------------------|----------------------------|

Police :10 pt

|                                      |                            |
|--------------------------------------|----------------------------|
| <b>Page 131 : [612] Mis en forme</b> | <b>03/05/2024 16:41:00</b> |
|--------------------------------------|----------------------------|

Police :10 pt

|                                      |                            |
|--------------------------------------|----------------------------|
| <b>Page 131 : [613] Mis en forme</b> | <b>03/05/2024 16:41:00</b> |
|--------------------------------------|----------------------------|

Police :10 pt

|                                      |                            |
|--------------------------------------|----------------------------|
| <b>Page 131 : [614] Mis en forme</b> | <b>03/05/2024 16:41:00</b> |
|--------------------------------------|----------------------------|

Police :10 pt

|                                      |                            |
|--------------------------------------|----------------------------|
| <b>Page 131 : [615] Mis en forme</b> | <b>03/05/2024 16:41:00</b> |
|--------------------------------------|----------------------------|

Police :10 pt

|                                      |                            |
|--------------------------------------|----------------------------|
| <b>Page 131 : [616] Mis en forme</b> | <b>03/05/2024 16:41:00</b> |
|--------------------------------------|----------------------------|

Police :10 pt

|                                      |                            |
|--------------------------------------|----------------------------|
| <b>Page 131 : [617] Mis en forme</b> | <b>03/05/2024 16:41:00</b> |
|--------------------------------------|----------------------------|

Police :10 pt

|                                      |                            |
|--------------------------------------|----------------------------|
| <b>Page 131 : [618] Mis en forme</b> | <b>03/05/2024 16:41:00</b> |
|--------------------------------------|----------------------------|

Police :10 pt

|                                      |                            |
|--------------------------------------|----------------------------|
| <b>Page 131 : [619] Mis en forme</b> | <b>03/05/2024 16:41:00</b> |
|--------------------------------------|----------------------------|

Police :10 pt, Gras

|                                      |                            |
|--------------------------------------|----------------------------|
| <b>Page 131 : [619] Mis en forme</b> | <b>03/05/2024 16:41:00</b> |
|--------------------------------------|----------------------------|

Police :10 pt

**Page 131 : [622] Mis en forme** 03/05/2024 16:41:00

Police :10 pt

**Page 131 : [623] Mis en forme** 03/05/2024 16:41:00

Police :10 pt

**Page 131 : [624] Mis en forme** 03/05/2024 16:41:00

Police :10 pt

**Page 132 : [625] Supprimé** 03/05/2024 16:41:00

**Page 147 : [626] Mis en forme** 03/05/2024 16:41:00

Normal, Bordure : Haut: (Pas de bordure), Bas: (Pas de bordure), Gauche: (Pas de bordure), Droite: (Pas de bordure), Entre : (Pas de bordure)

**Page 147 : [627] Mis en forme** 03/05/2024 16:41:00

Forcer une largeur de colonne identique

**Page 147 : [628] Mis en forme** 03/05/2024 16:41:00

Anglais (G.B.)

**Page 147 : [628] Mis en forme** 03/05/2024 16:41:00

Anglais (G.B.)

**Page 147 : [628] Mis en forme** 03/05/2024 16:41:00

Anglais (G.B.)

**Page 147 : [629] Mis en forme** 03/05/2024 16:41:00

Police :Gras, Anglais (G.B.)

**Page 147 : [630] Tableau mis en forme** 03/05/2024 16:41:00

Tableau mis en forme

**Page 147 : [631] Mis en forme** 03/05/2024 16:41:00

Retrait : Gauche : 0,25 cm

**Page 147 : [632] Supprimé** 03/05/2024 16:41:00

Director, Office of Science, Office of Biological and Environmental Research of the US Department of Energy under Contract No. DE-AC02-05CH11231 to Lawrence Berkeley National Laboratory as part of the RUBISCO Scientific Focus Area,

WJR, OZ, E3SM/ELM simulations

**Page 147 : [633] Mis en forme** 03/05/2024 16:41:00

Espace Après : 6 pt

|                               |                     |
|-------------------------------|---------------------|
| Page 147 : [636] Mis en forme | 03/05/2024 16:41:00 |
|-------------------------------|---------------------|

Police :+Corps (Times New Roman), Anglais (G.B.)

|                           |                     |
|---------------------------|---------------------|
| Page 147 : [637] Supprimé | 03/05/2024 16:41:00 |
|---------------------------|---------------------|

|                               |                     |
|-------------------------------|---------------------|
| Page 147 : [638] Mis en forme | 03/05/2024 16:41:00 |
|-------------------------------|---------------------|

Espace Après : 6 pt

|                               |                     |
|-------------------------------|---------------------|
| Page 147 : [639] Mis en forme | 03/05/2024 16:41:00 |
|-------------------------------|---------------------|

Police :+Corps (Times New Roman), Anglais (G.B.)

|                               |                     |
|-------------------------------|---------------------|
| Page 147 : [640] Mis en forme | 03/05/2024 16:41:00 |
|-------------------------------|---------------------|

Police :+Corps (Times New Roman), Anglais (G.B.)

|                               |                     |
|-------------------------------|---------------------|
| Page 147 : [641] Mis en forme | 03/05/2024 16:41:00 |
|-------------------------------|---------------------|

Espace Après : 6 pt

|                                       |                     |
|---------------------------------------|---------------------|
| Page 147 : [642] Tableau mis en forme | 03/05/2024 16:41:00 |
|---------------------------------------|---------------------|

Tableau mis en forme

|                               |                     |
|-------------------------------|---------------------|
| Page 147 : [643] Mis en forme | 03/05/2024 16:41:00 |
|-------------------------------|---------------------|

Police :+Corps (Times New Roman)

|                               |                     |
|-------------------------------|---------------------|
| Page 147 : [644] Mis en forme | 03/05/2024 16:41:00 |
|-------------------------------|---------------------|

Police :+Corps (Times New Roman)

|                               |                     |
|-------------------------------|---------------------|
| Page 147 : [644] Mis en forme | 03/05/2024 16:41:00 |
|-------------------------------|---------------------|

Police :+Corps (Times New Roman)

|                               |                     |
|-------------------------------|---------------------|
| Page 147 : [645] Mis en forme | 03/05/2024 16:41:00 |
|-------------------------------|---------------------|

Police :+Corps (Times New Roman)

|                               |                     |
|-------------------------------|---------------------|
| Page 147 : [645] Mis en forme | 03/05/2024 16:41:00 |
|-------------------------------|---------------------|

Police :+Corps (Times New Roman)

|                               |                     |
|-------------------------------|---------------------|
| Page 147 : [646] Mis en forme | 03/05/2024 16:41:00 |
|-------------------------------|---------------------|

Police :+Corps (Times New Roman), Anglais (G.B.), Indice

|                           |                     |
|---------------------------|---------------------|
| Page 147 : [647] Supprimé | 03/05/2024 16:41:00 |
|---------------------------|---------------------|

|                               |                     |
|-------------------------------|---------------------|
| Page 147 : [648] Mis en forme | 03/05/2024 16:41:00 |
|-------------------------------|---------------------|

Espace Après : 6 pt

|                               |                     |
|-------------------------------|---------------------|
| Page 147 : [649] Mis en forme | 03/05/2024 16:41:00 |
|-------------------------------|---------------------|

Police :+Corps (Times New Roman)

**Page 147 : [650] Mis en forme** 03/05/2024 16:41:00

Police :+Corps (Times New Roman), Anglais (G.B.)

**Page 147 : [651] Mis en forme** 03/05/2024 16:41:00

Police :+Corps (Times New Roman), Anglais (G.B.)

**Page 147 : [652] Supprimé** 03/05/2024 16:41:00

Funded by the Swedish Research Council VR (2020-05338) and Swedish National Space Agency (209/19) WZ: LPI-GUESS simulations

**Page 147 : [653] Mis en forme** 03/05/2024 16:41:00

Espace Après : 6 pt

**Page 147 : [654] Tableau mis en forme** 03/05/2024 16:41:00

Tableau mis en forme

**Page 147 : [655] Mis en forme** 03/05/2024 16:41:00

Police :+Corps (Times New Roman)

**Page 147 : [656] Mis en forme** 03/05/2024 16:41:00

Police :+Corps (Times New Roman)

**Page 147 : [656] Mis en forme** 03/05/2024 16:41:00

Police :+Corps (Times New Roman)

**Page 147 : [657] Mis en forme** 03/05/2024 16:41:00

Police :+Corps (Times New Roman), Anglais (G.B.)

**Page 147 : [658] Mis en forme** 03/05/2024 16:41:00

Espace Après : 6 pt

**Page 147 : [659] Mis en forme** 03/05/2024 16:41:00

Police :+Corps (Times New Roman)

**Page 147 : [660] Mis en forme** 03/05/2024 16:41:00

Police :+Corps (Times New Roman)

**Page 147 : [661] Supprimé** 03/05/2024 16:41:00

▼

**Page 147 : [662] Mis en forme** 03/05/2024 16:41:00

Police :+Corps (Times New Roman), Anglais (G.B.)

**Page 147 : [663] Mis en forme** 03/05/2024 16:41:00

EU H2020 (725546 ERC METLAKE and 101015825 TRIAGE) , Swedish Research Councils VR (2022-03841) and Formas (2018-01794)

DB; inland waters - data and bottom up estimation

**Page 147 : [666] Mis en forme** **03/05/2024 16:41:00**

Espace Après : 6 pt

**Page 147 : [667] Tableau mis en forme** **03/05/2024 16:41:00**

Tableau mis en forme

**Page 147 : [668] Mis en forme** **03/05/2024 16:41:00**

Police :+Corps (Times New Roman), Anglais (G.B.)

**Page 147 : [669] Supprimé** **03/05/2024 16:41:00**

**Page 147 : [670] Mis en forme** **03/05/2024 16:41:00**

Police :+Corps (Times New Roman), Anglais (G.B.)

**Page 147 : [671] Supprimé** **03/05/2024 16:41:00**

**Page 147 : [672] Mis en forme** **03/05/2024 16:41:00**

Espace Après : 6 pt

**Page 147 : [673] Tableau mis en forme** **03/05/2024 16:41:00**

Tableau mis en forme

**Page 147 : [674] Mis en forme** **03/05/2024 16:41:00**

Police :+Corps (Times New Roman)

**Page 147 : [674] Mis en forme** **03/05/2024 16:41:00**

Police :+Corps (Times New Roman)

**Page 147 : [675] Mis en forme** **03/05/2024 16:41:00**

Police :+Corps (Times New Roman), 12 pt, Anglais (G.B.)

**Page 147 : [676] Mis en forme** **03/05/2024 16:41:00**

Espace Après : 6 pt

**Page 147 : [677] Supprimé** **03/05/2024 16:41:00**

Funded by United Nations Environment Programme, Stanford University DTIE21-EN3143

RBJ; inversions and general budget support

**Page 147 : [678] Mis en forme** **03/05/2024 16:41:00**

Espace Après : 6 pt

**Page 147 : [679] Tableau mis en forme** **03/05/2024 16:41:00**

Tableau mis en forme



**Page 147 : [682] Supprimé** 03/05/2024 16:41:00

the Joint Fund for Regional Innovation and Development of the National Natural Science Foundation (Grant No. U22A20570); the Natural Sciences and Engineering Research Council of Canada (NSERC, #371706) Changhui Peng/TRIPLEX-GHG

**Page 147 : [683] Mis en forme** 03/05/2024 16:41:00

Espace Avant : 12 pt, Après : 6 pt

**Page 147 : [684] Tableau mis en forme** 03/05/2024 16:41:00

Tableau mis en forme

**Page 147 : [685] Mis en forme** 03/05/2024 16:41:00

Police :+Corps (Times New Roman)

**Page 147 : [685] Mis en forme** 03/05/2024 16:41:00

Police :+Corps (Times New Roman)

**Page 147 : [686] Mis en forme** 03/05/2024 16:41:00

Police :+Corps (Times New Roman)

**Page 147 : [686] Mis en forme** 03/05/2024 16:41:00

Police :+Corps (Times New Roman)

**Page 147 : [687] Mis en forme** 03/05/2024 16:41:00

Retrait : Gauche : -0,21 cm, Espace Avant : 12 pt, Après : 6 pt

**Page 147 : [688] Mis en forme** 03/05/2024 16:41:00

Police :+Corps (Times New Roman), Anglais (G.B.)

**Page 147 : [689] Supprimé** 03/05/2024 16:41:00

**Page 147 : [690] Mis en forme** 03/05/2024 16:41:00

Police :Gras

**Page 147 : [691] Tableau mis en forme** 03/05/2024 16:41:00

Tableau mis en forme

**Page 147 : [692] Supprimé** 03/05/2024 16:41:00

**Page 147 : [693] Mis en forme** 03/05/2024 16:41:00

Espace Après : 6 pt

**Page 147 : [694] Tableau mis en forme** 03/05/2024 16:41:00

Tableau mis en forme

**Page 147 : [695] Mis en forme** 03/05/2024 16:41:00

Fronçais

Page 147 : [698] Supprimé

03/05/2024 16:41:00

NASA High-End Computing (HEC) Program through the NASA Advanced  
Supercomputing (NAS) Division at NASA Ames Research Center

Matthew S. Johnson (MSJ)

Page 147 : [699] Mis en forme

03/05/2024 16:41:00

Espace Après : 6 pt

Page 147 : [700] Tableau mis en forme

03/05/2024 16:41:00

Tableau mis en forme
